# Supplementary material
Source: PubMed Central journal article supplement (PMC7138021)
Supplement: NIHMS1575650-supplement-Sup_Fig.pdf [file NIHMS1575650-supplement-Sup_Fig.pdf]

# Supplementary Figure 1.

## Extended Data Fig. 2f

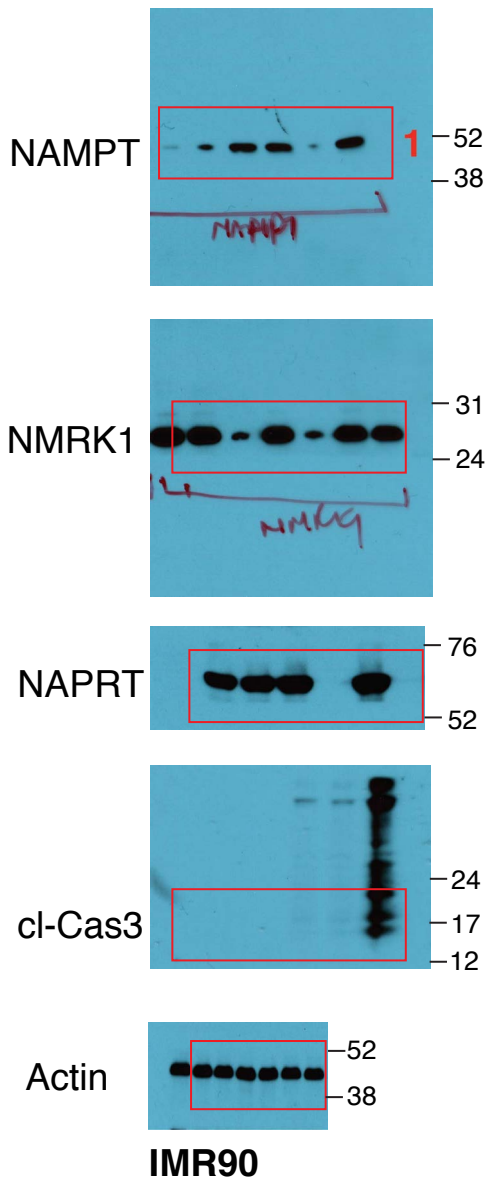

Supplementary Figure 1: Un-cropped immunoblot scans with size marker indications. Raw film scans with red box indicate the area shown in display. Loading control (Actin) on separate gels.

## Extended Data Fig. 2f

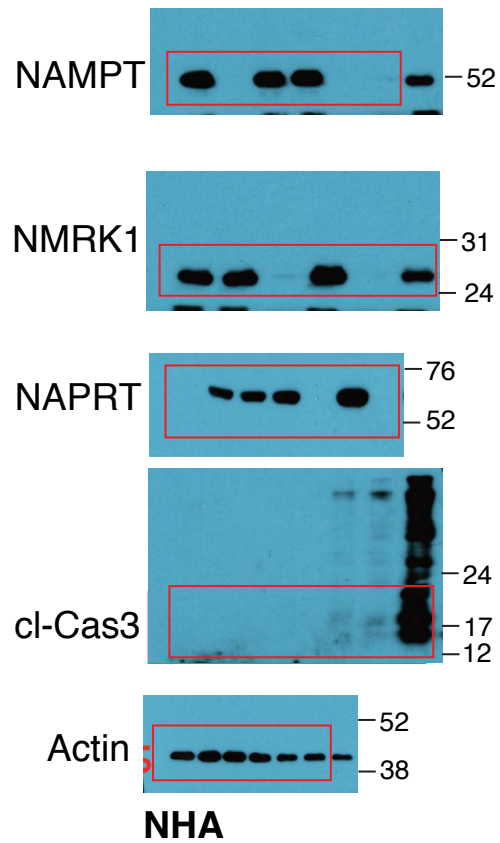

## Extended Data Fig. 2f

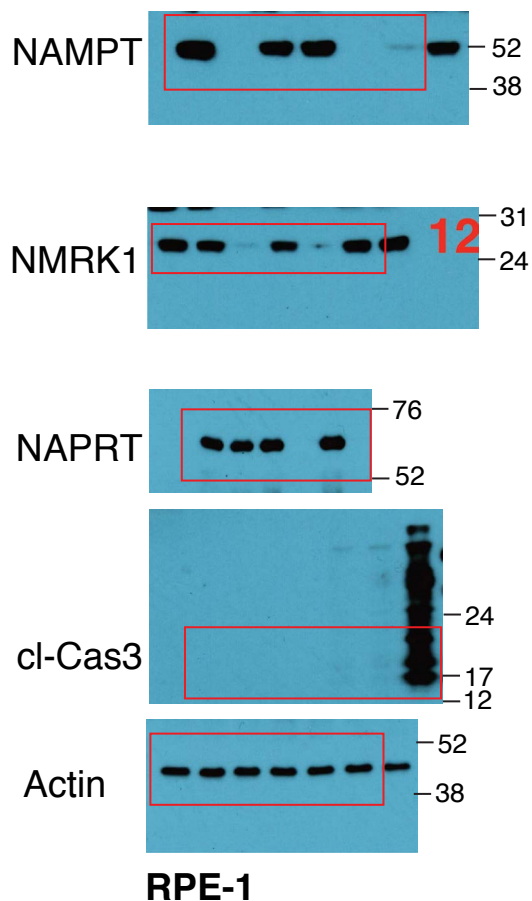

# Supplementary Figure 1.

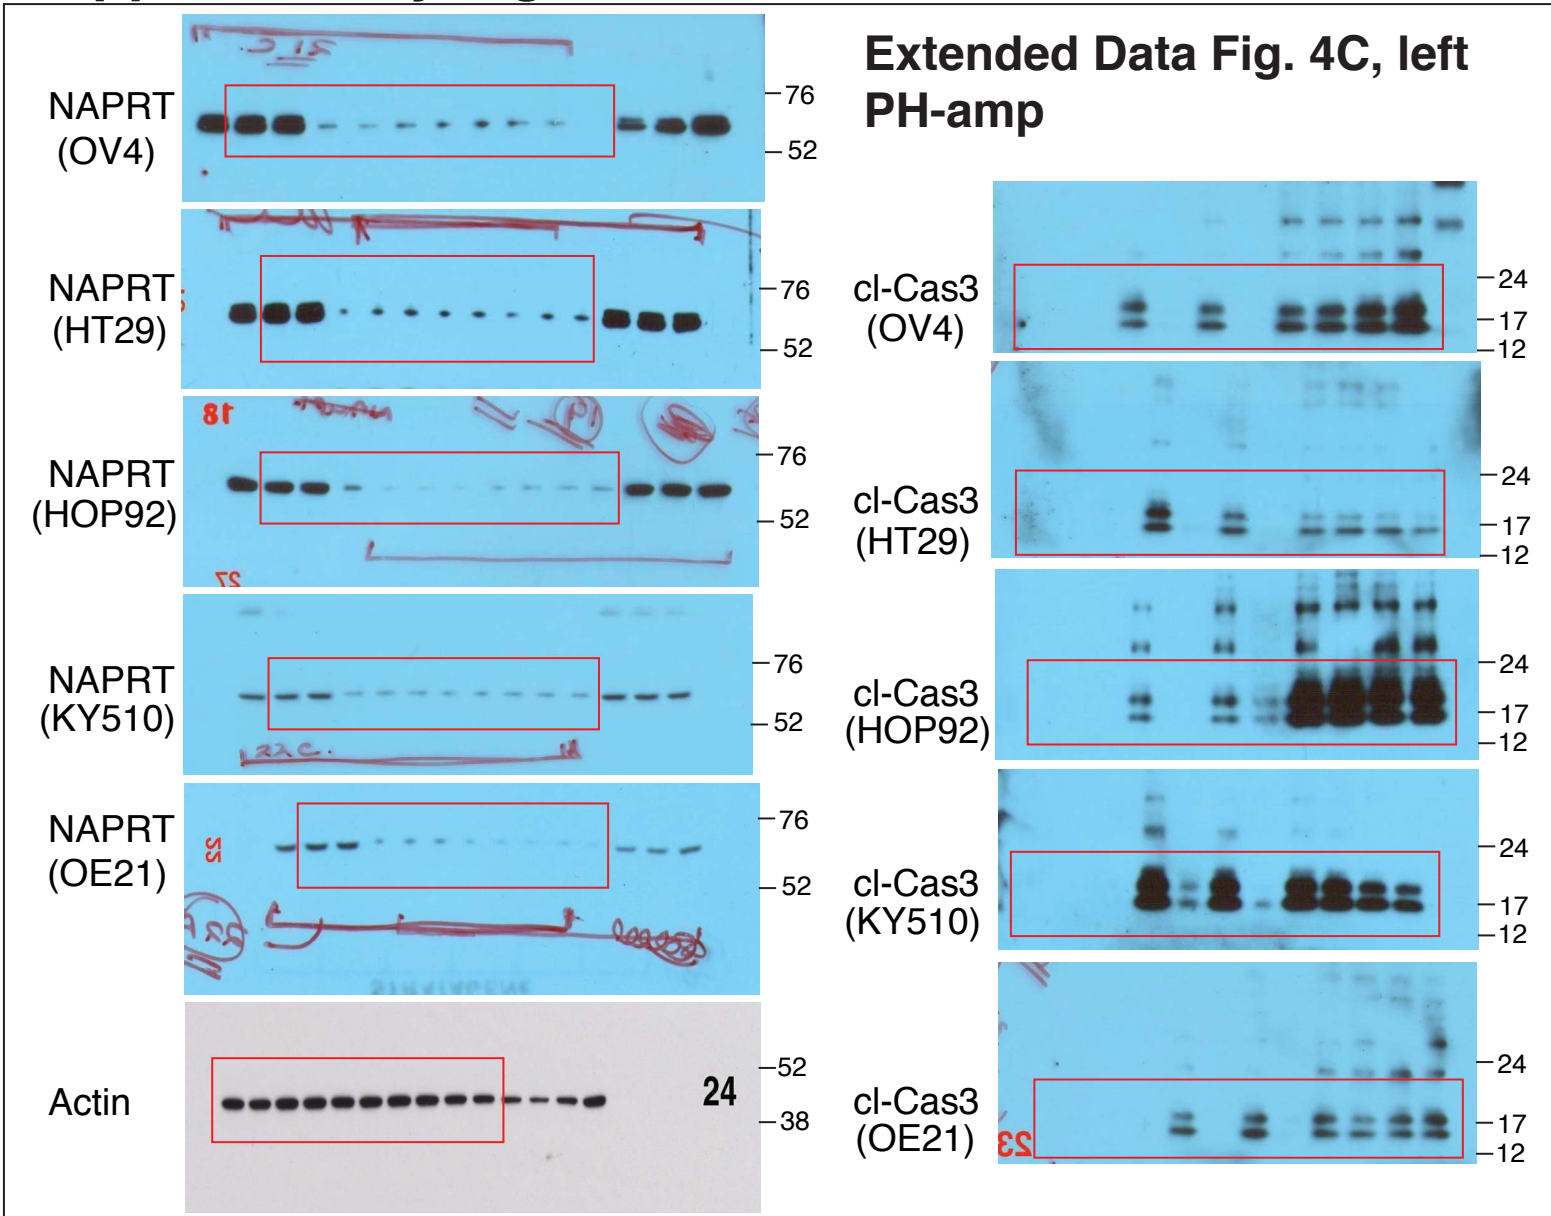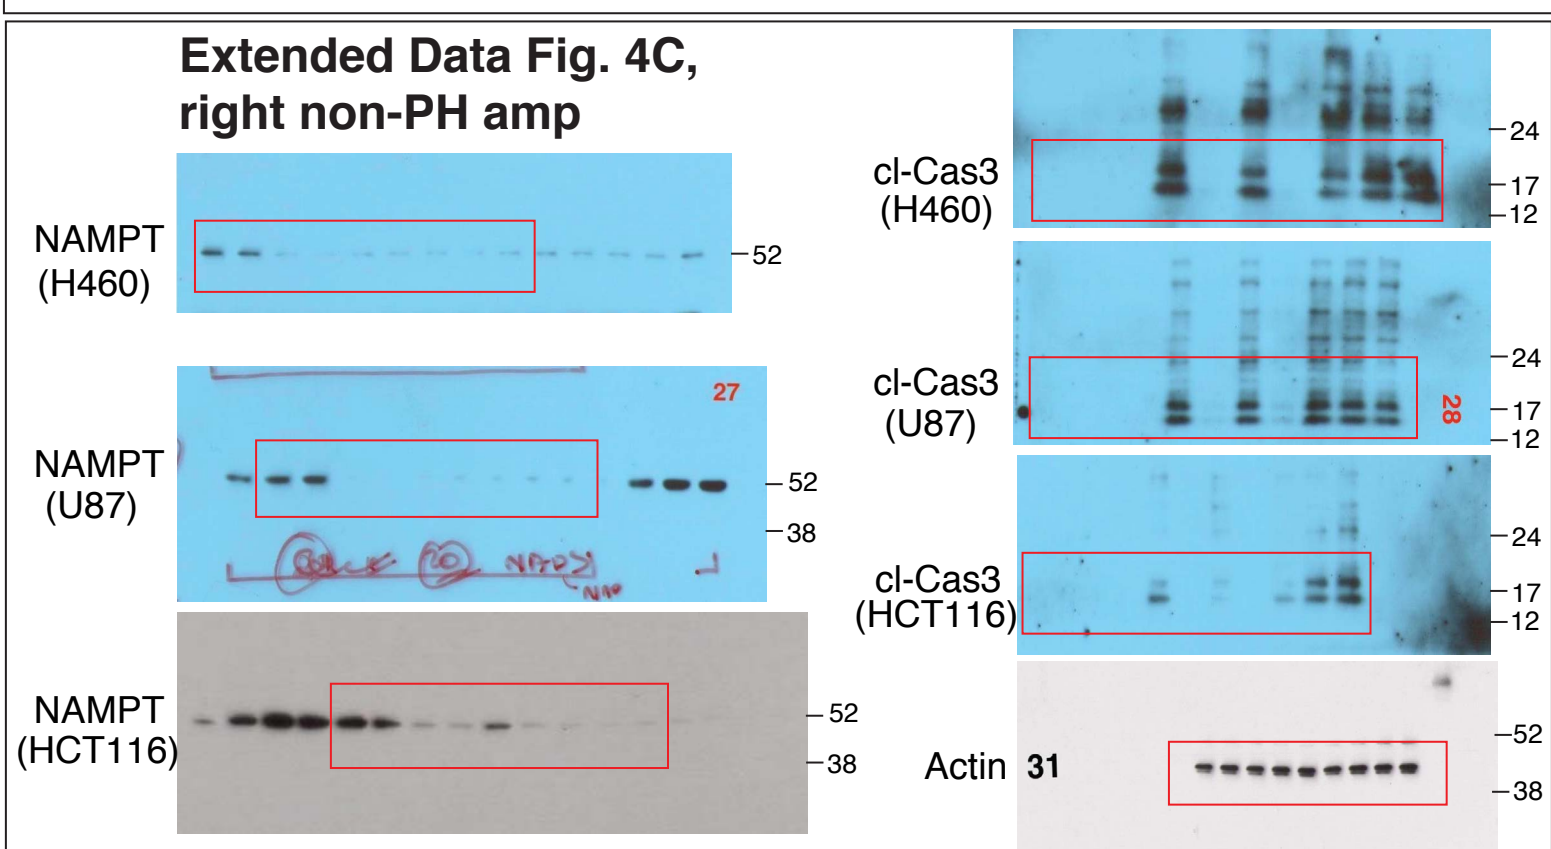

Supplementary Figure 1: Un-cropped immunoblot scans with size marker indications. Raw film scans with red box indicate the area shown in display. Loading control (Actin) on separate gels.

# Supplementary Figure 1.

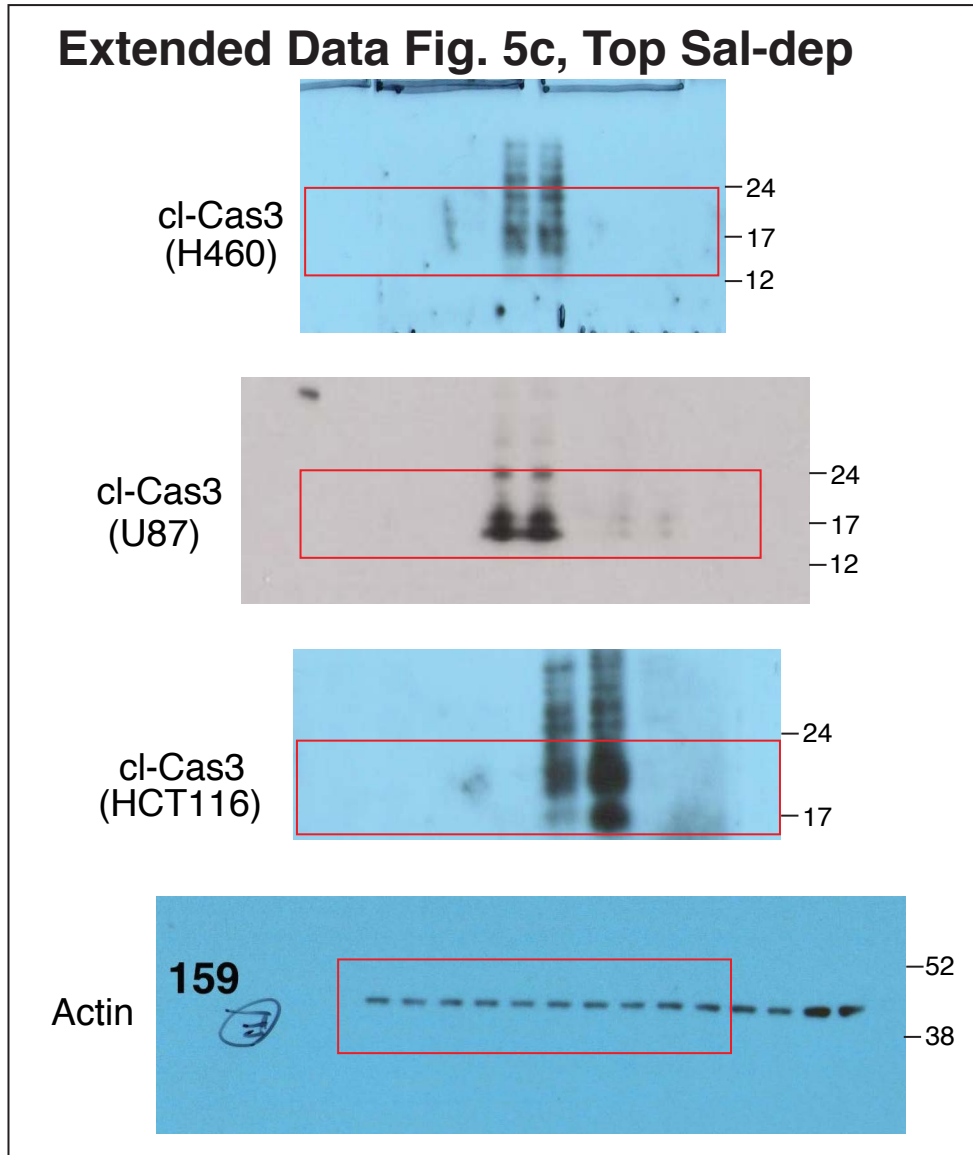

### Extended Data Fig. 5c, Bottom PH amp

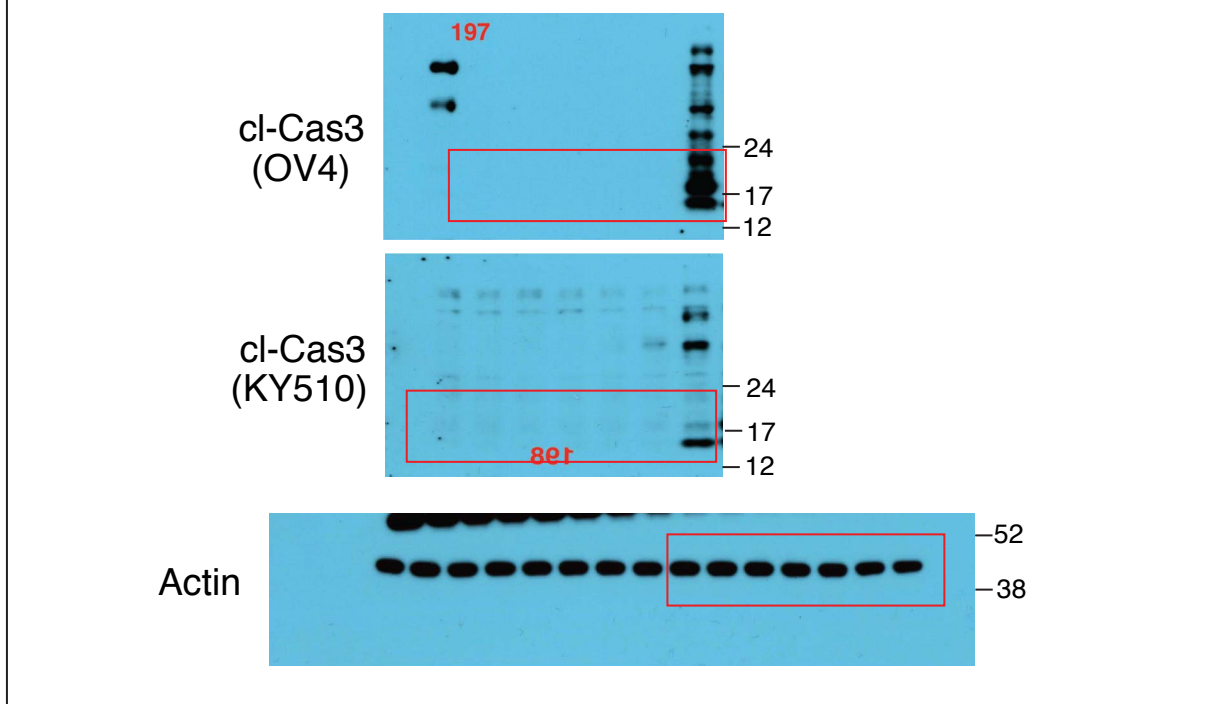

Supplementary Figure 1: Un-cropped immunoblot scans with size marker indications. Raw film scans with red box indicate the area shown in display. Loading control (Actin) on separate gels.



# Supplementary Figure 1.

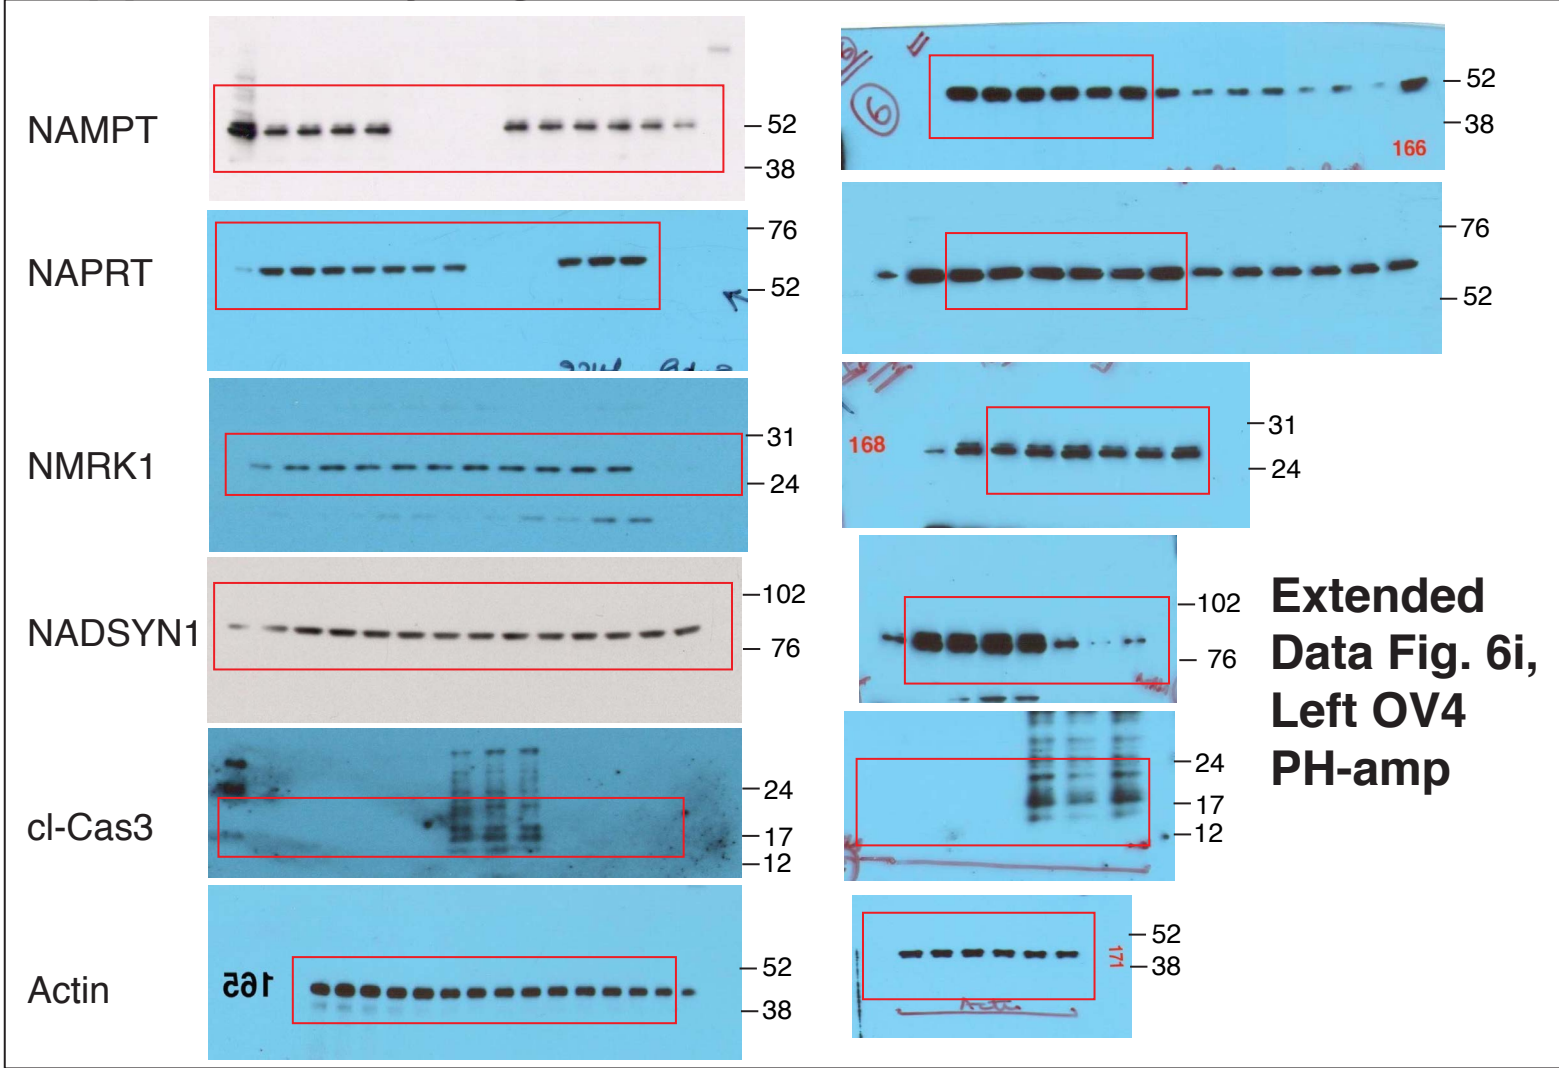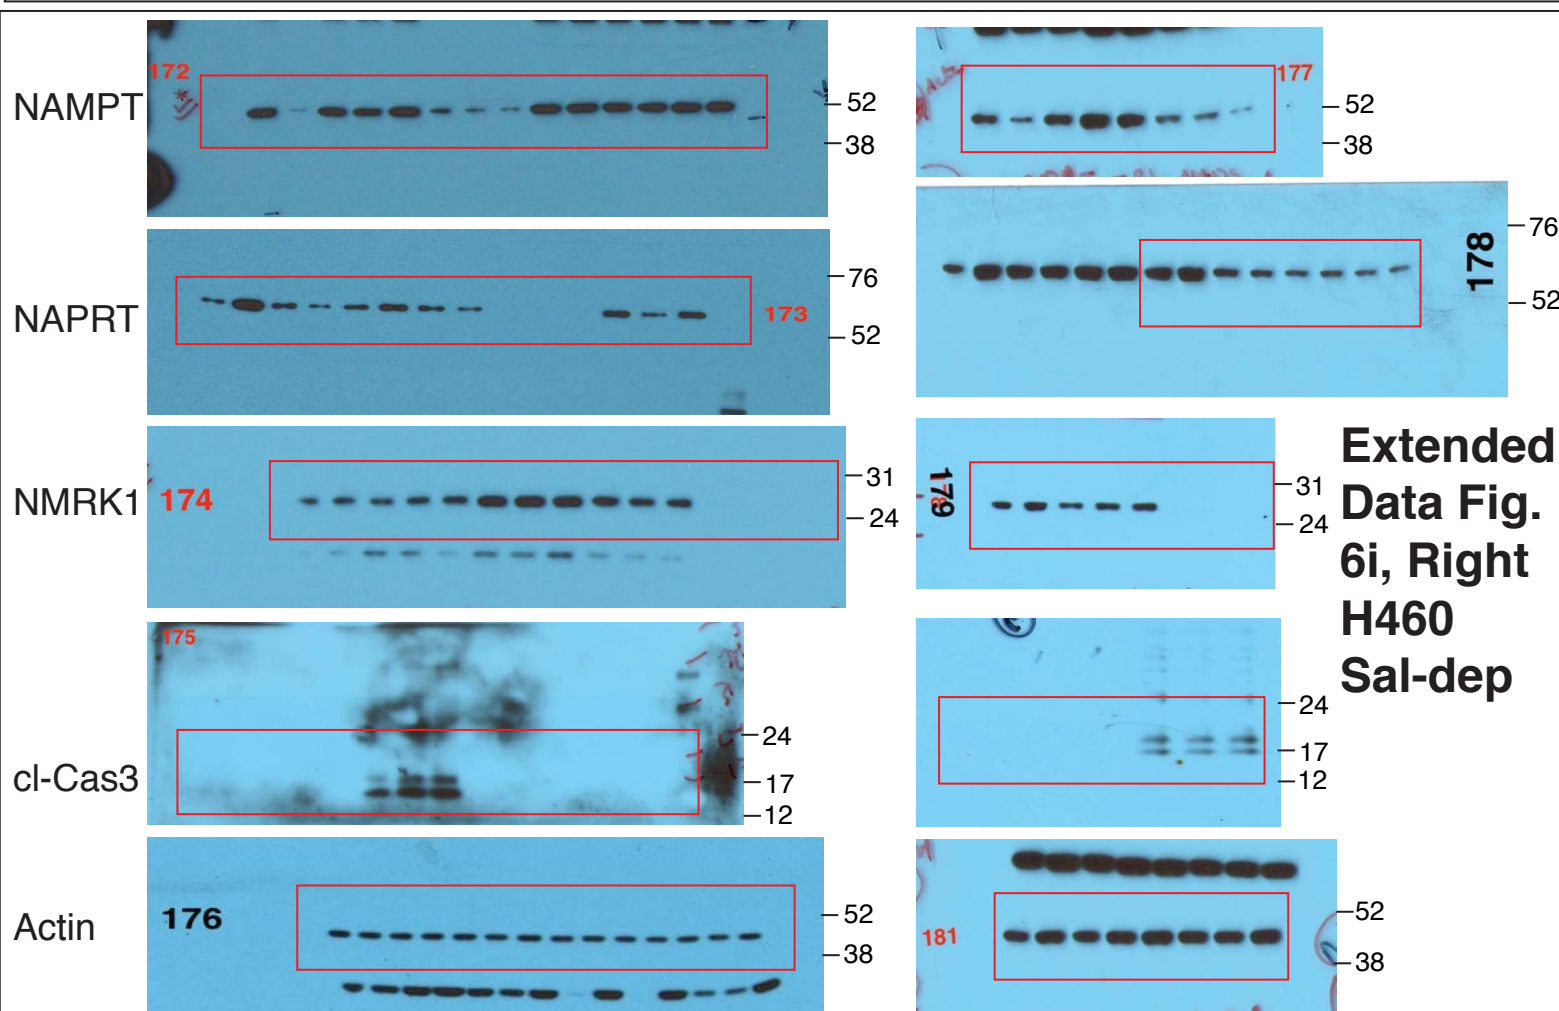

Supplementary Figure 1: Un-cropped immunoblot scans with size marker indications. Raw film scans with red box indicate the area shown in display. Loading control (Actin) on separate gels.

# Supplementary Figure 1.

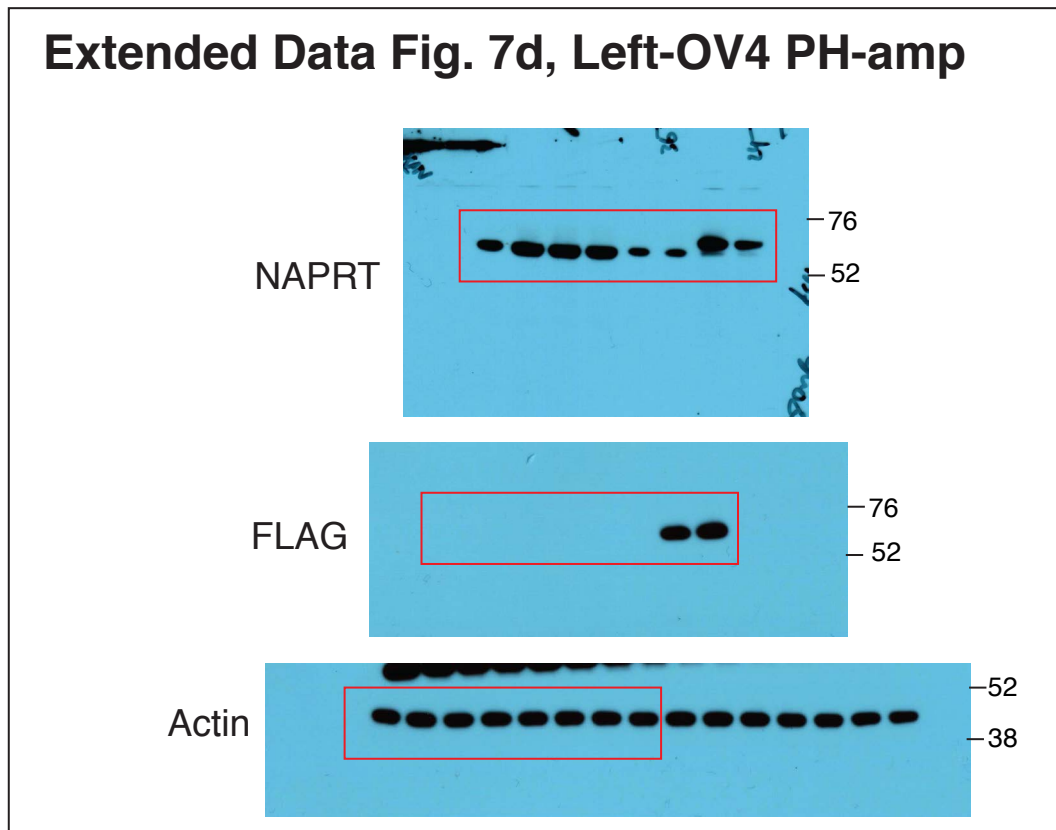

## Extended Data Fig. 7d, Right, H460 Sal-dep

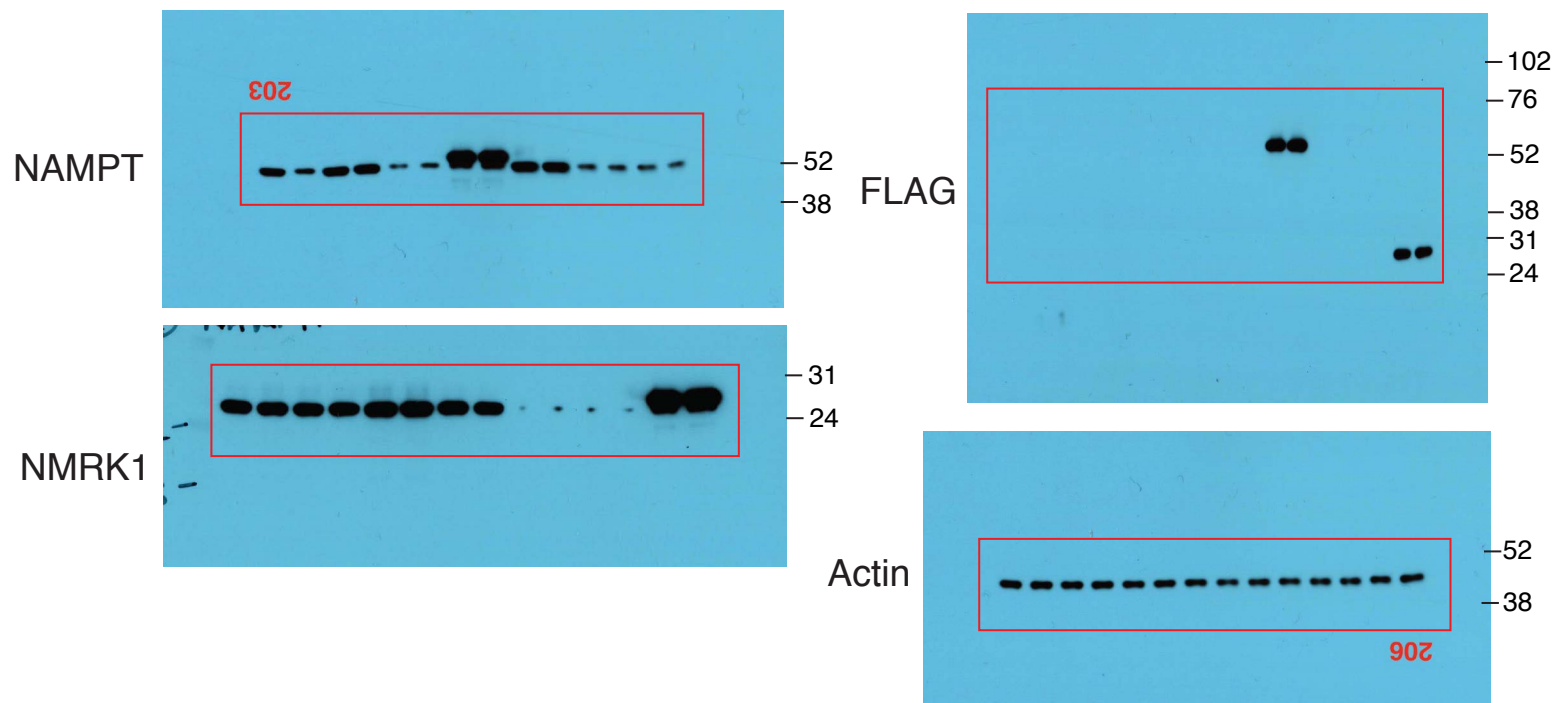

Supplementary Figure 1: Un-cropped immunoblot scans with size marker indications. Raw film scans with red box indicate the area shown in display. Loading control (Actin) on separate gels.

# Supplementary Figure 1.

## Extended Data Fig. 8b, H460<sup>Sal-dep</sup>

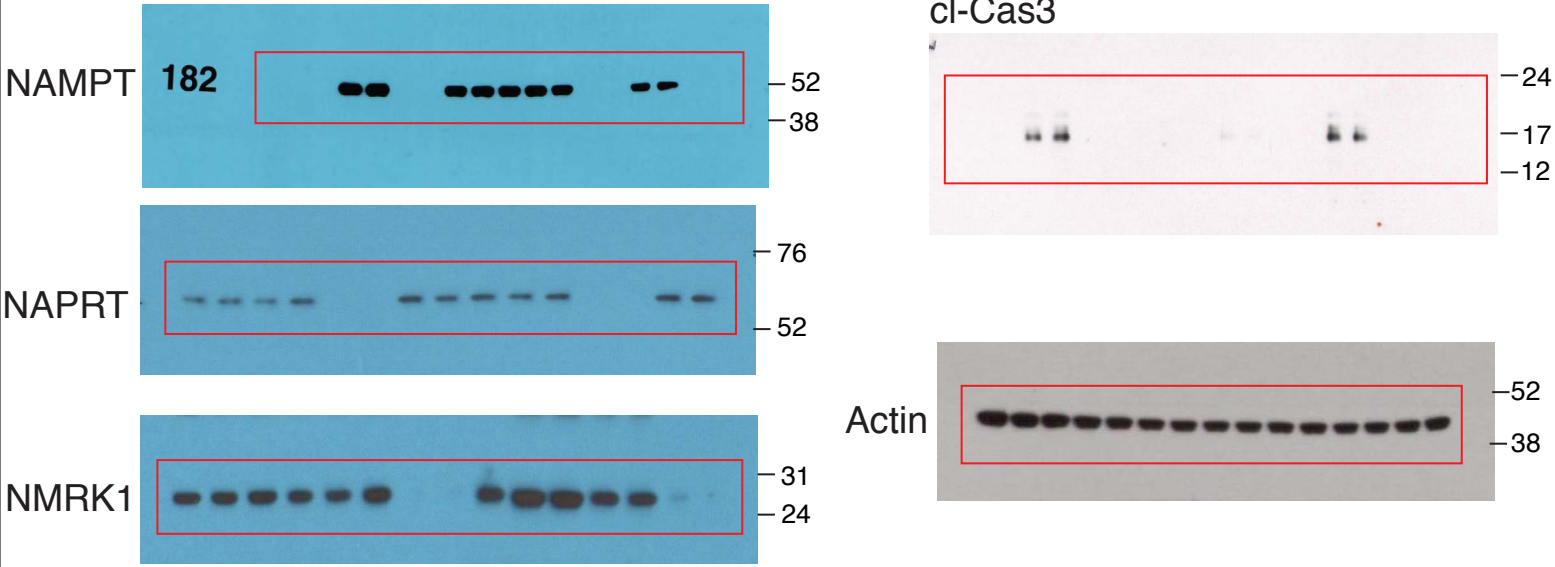

## Extended Data Fig. 8b, HCT116<sup>Sal-dep</sup>

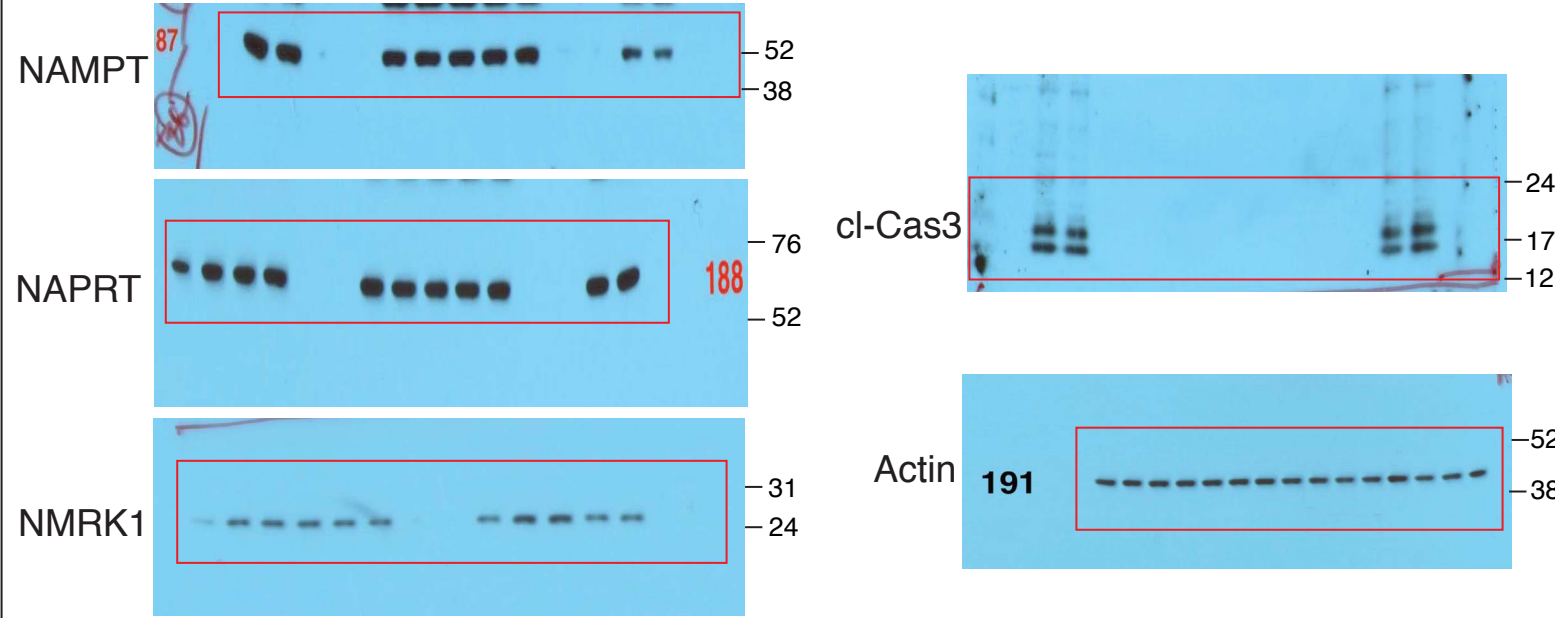

## Extended Data Fig. 8b, U87<sup>Sal-dep</sup>

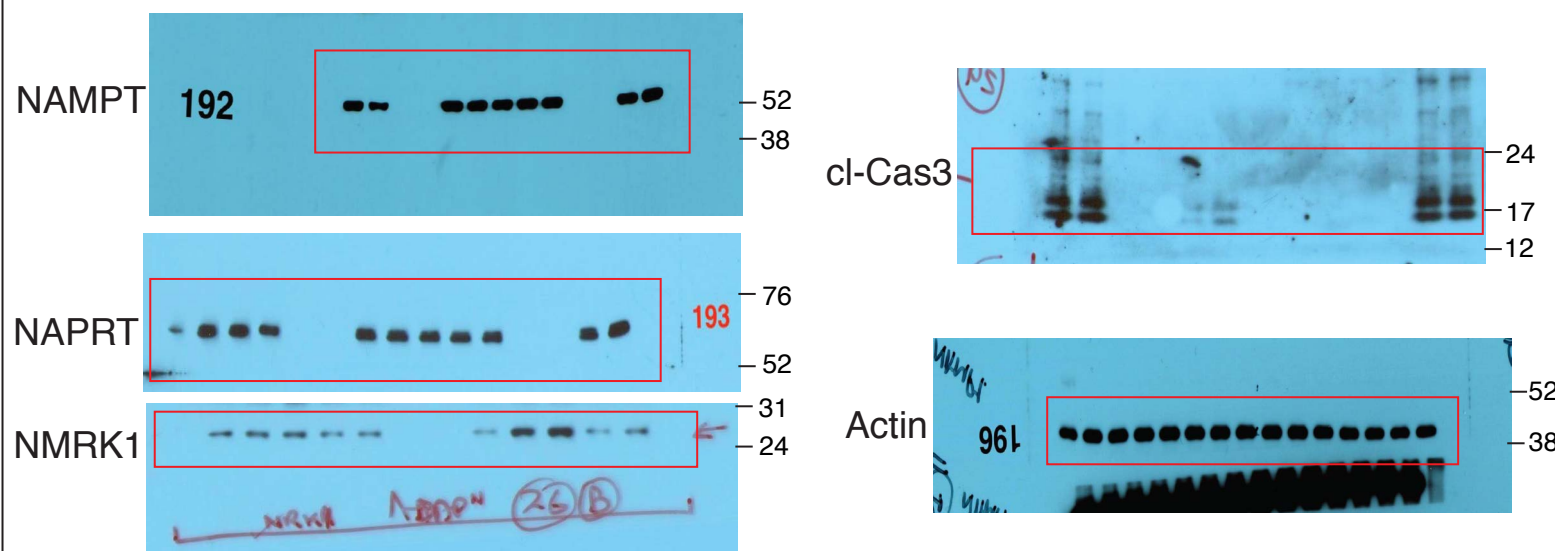

Supplementary Figure 1: Un-cropped immunoblot scans with size marker indications. Raw film scans with red box indicate the area shown in display. Loading control (Actin) on separate gels.



# Supplementary Figure 1.

## Extended Data Fig. 9c

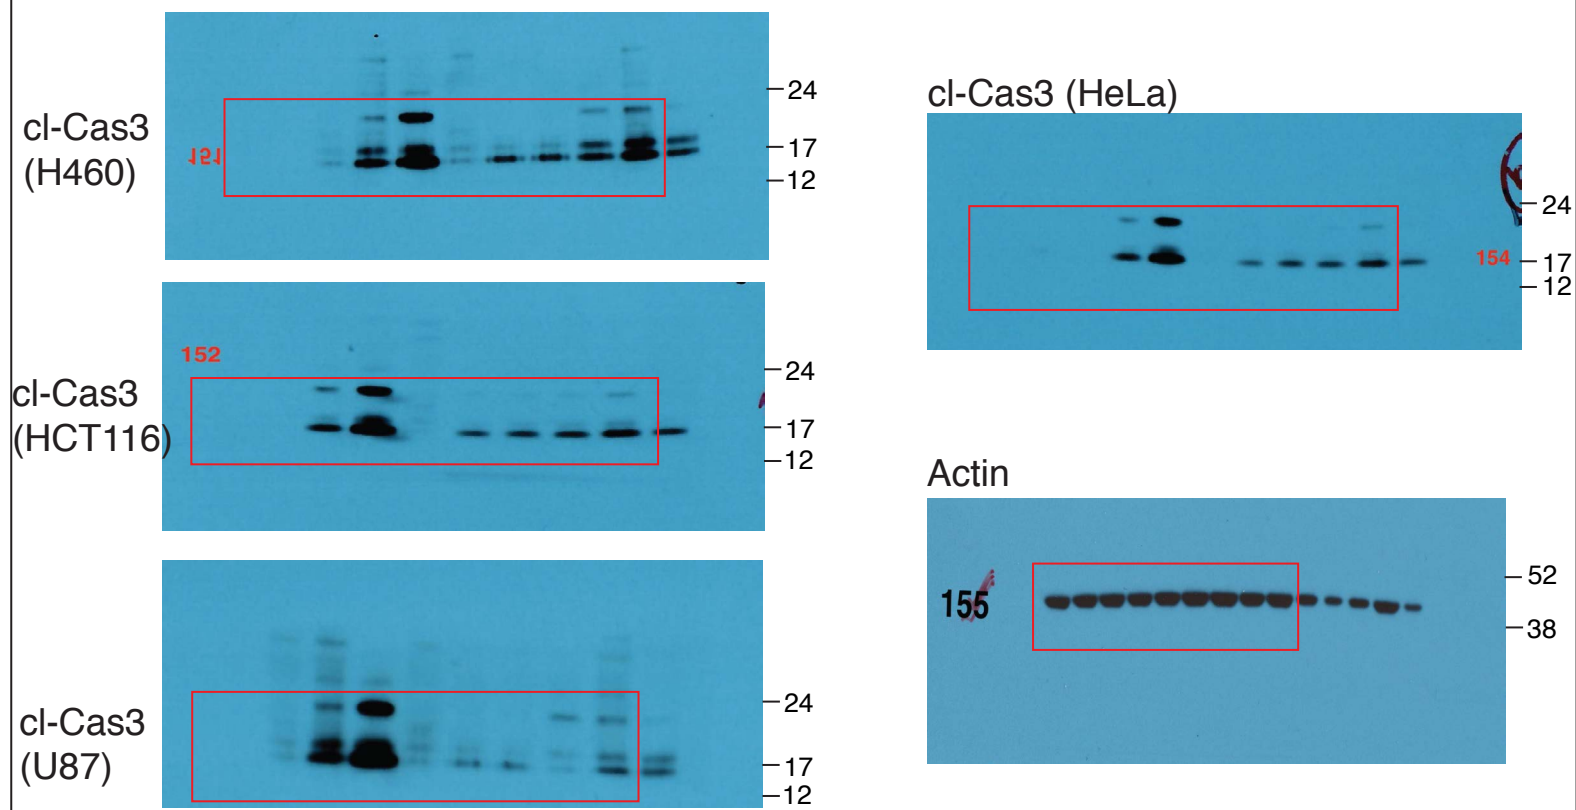

## Extended Data Fig. 9h

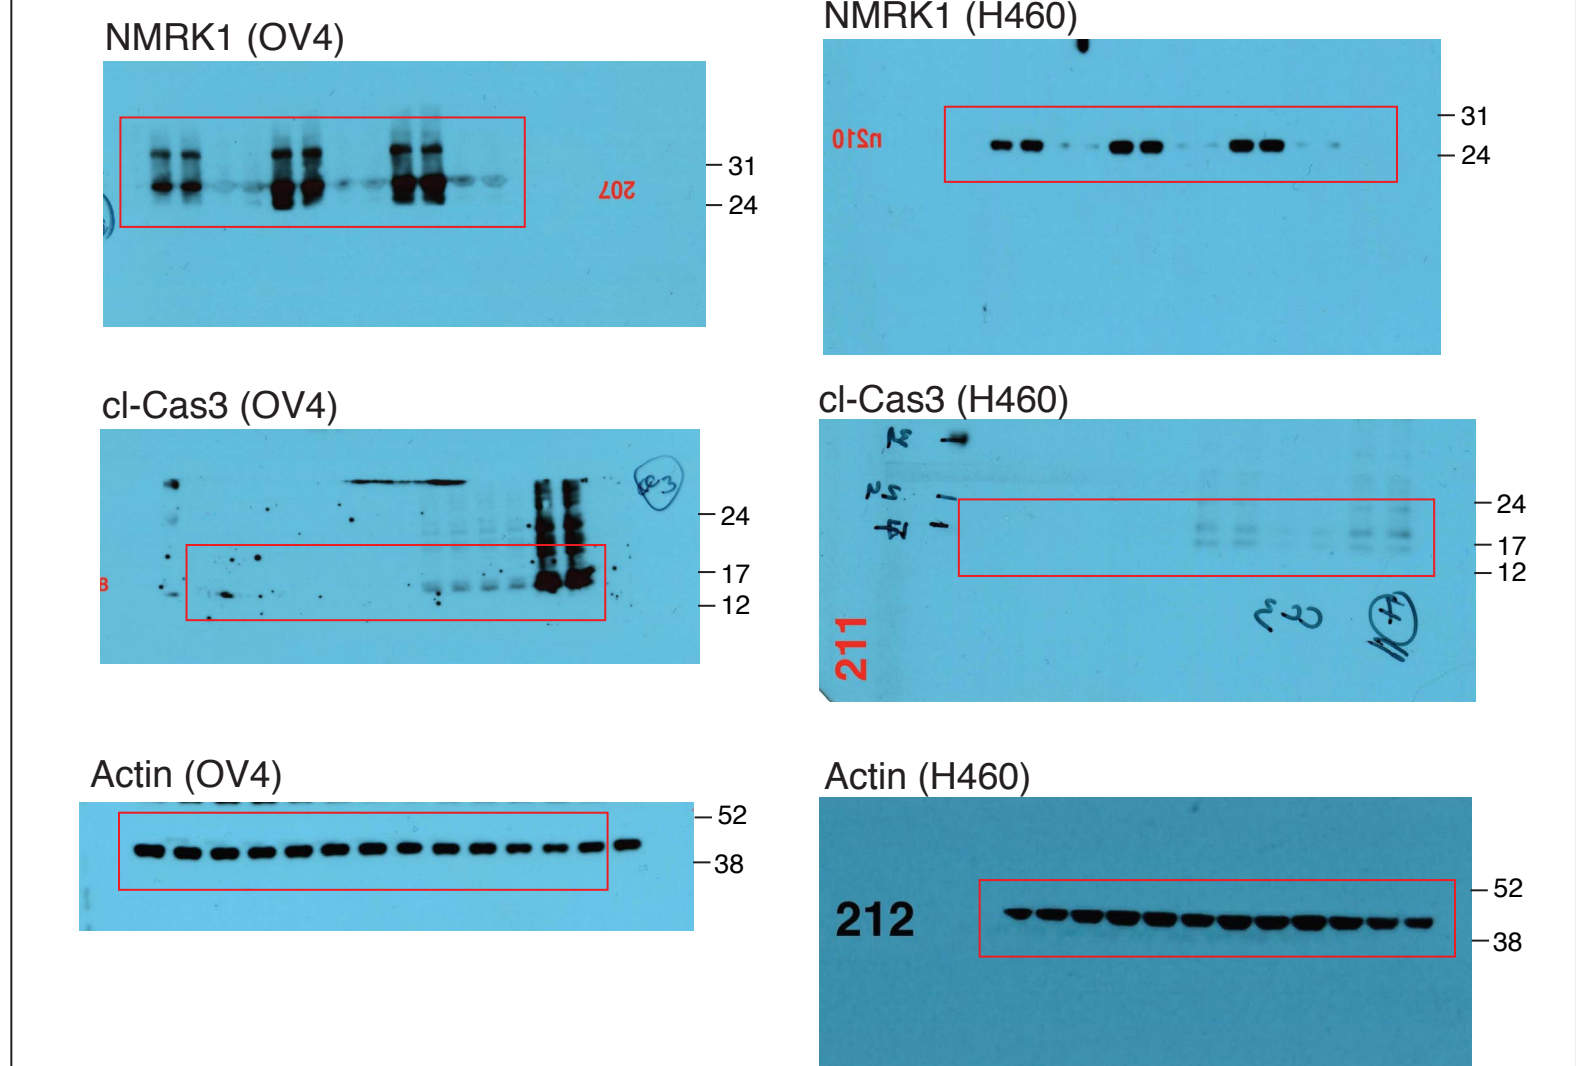

Supplementary Figure 1: Un-cropped immunoblot scans with size marker indications. Raw film scans with red box indicate the area shown in display. Loading control (Actin) on separate gels.

# Supplementary Figure 1.

## Extended Data

### Fig. 10a

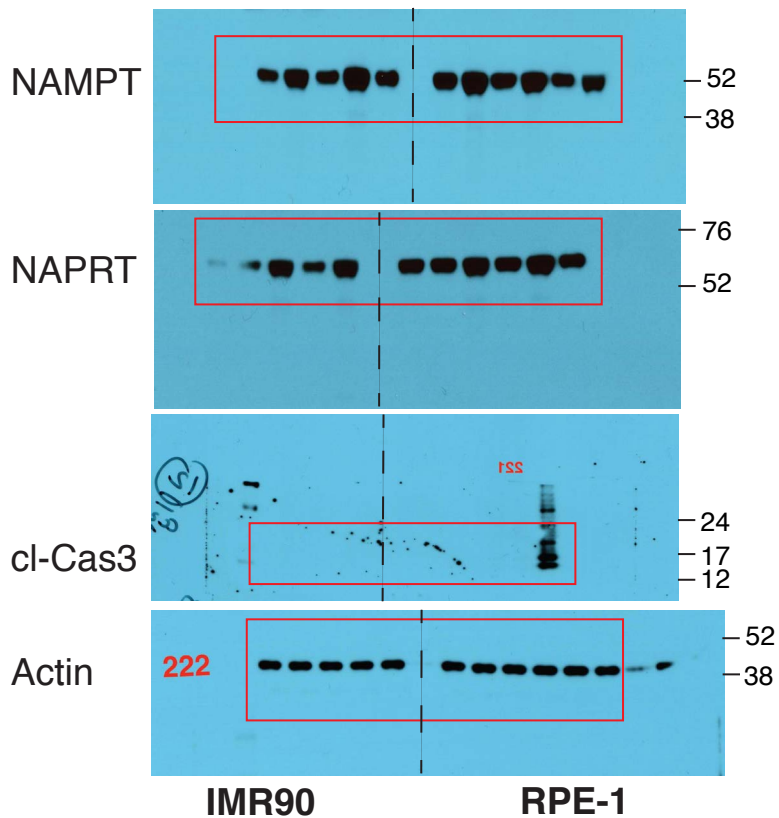

## Extended Data

### Fig. 10d

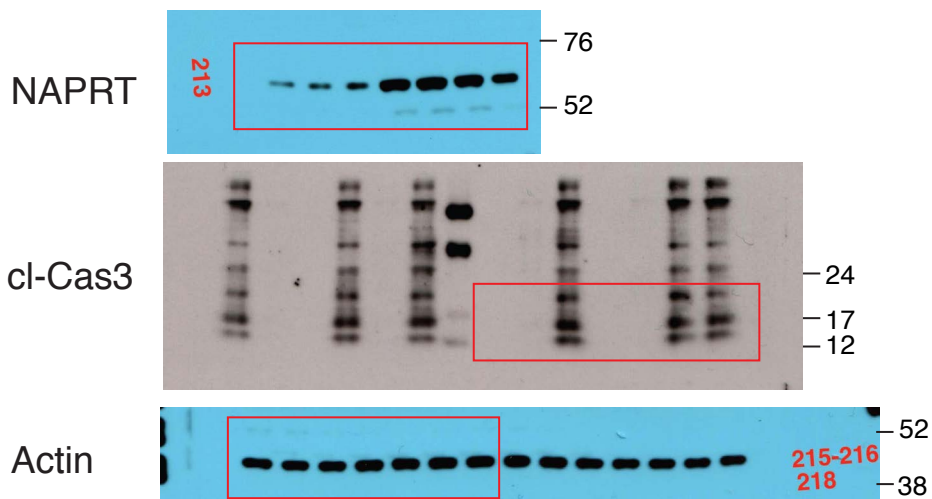

## Extended Data

### Fig. 10e

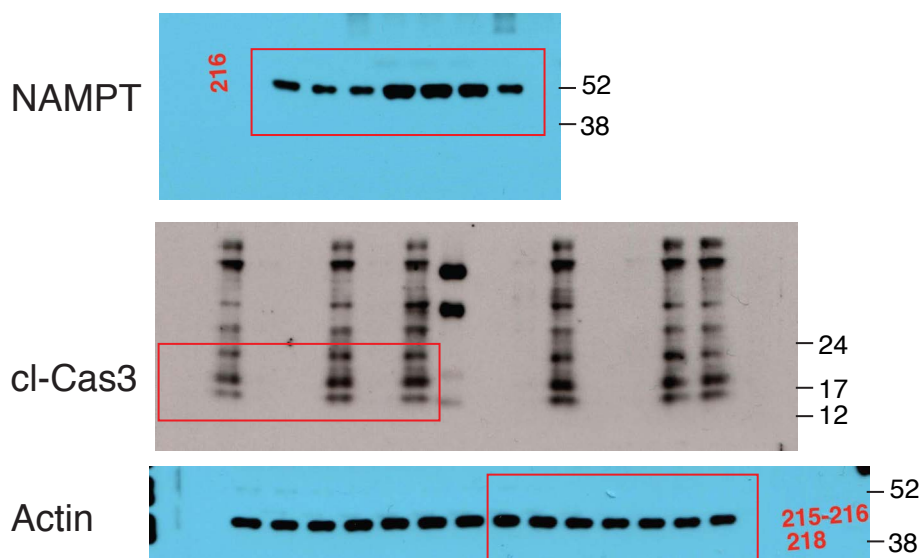

Supplementary Figure 1: Un-cropped immunoblot scans with size marker indications. Raw film scans with red box indicate the area shown in display. Loading control (Actin) on separate gels.
