# Supplementary material
Source: PubMed Central journal article supplement (PMC7138021)
Supplement: NIHMS1575650-supplement-Sup_Tab.pdf [file NIHMS1575650-supplement-Sup_Tab.pdf]

Supplementary Table 1-Posterior class probability of each tissue type; relate to Fig. 1b and Extended Data Fig. 1

| <b>Tissue Types</b> | <b>Sample size</b> | <b>mean <math>\pm</math> standard deviation</b> | <b>P(C T)</b> | <b>Classification</b> |
|---------------------|--------------------|-------------------------------------------------|---------------|-----------------------|
| Liver               | 153                | 42.4434 $\pm$ 10.9155                           | 0             | high                  |
| SI                  | 76                 | 45.9105 $\pm$ 13.0085                           | 0             | high                  |
| Esophagus           | 271                | 40.6468 $\pm$ 14.8043                           | 0             | high                  |
| Stomach             | 149                | 31.6402 $\pm$ 12.3226                           | 0             | high                  |
| Colon               | 129                | 34.7311 $\pm$ 13.6174                           | 0             | high                  |
| Salivary Gland      | 97                 | 25.3163 $\pm$ 7.5447                            | 0             | high                  |
| Prostate            | 169                | 34.1201 $\pm$ 13.0331                           | 0             | high                  |
| Bladder             | 91                 | 31.3717 $\pm$ 8.8247                            | 0             | high                  |
| Breast              | 240                | 25.5097 $\pm$ 9.3526                            | 0             | high                  |
| Lung                | 306                | 23.1637 $\pm$ 5.9364                            | 0             | high                  |
| Ovary               | 106                | 30.9952 $\pm$ 8.4593                            | 0             | high                  |
| Uterine/Cervix      | 28                 | 29.5271 $\pm$ 10.9981                           | 0             | high                  |
| Pancreas            | 80                 | 8.8798 $\pm$ 2.7321                             | 0             | low                   |
| Thyroid             | 98                 | 6.7295 $\pm$ 2.3581                             | 0             | low                   |
| Brain               | 84                 | 5.4363 $\pm$ 2.0664                             | 0             | low                   |
| Muscle              | 353                | 6.1393 $\pm$ 2.2842                             | 0             | low                   |
| Kidney              | 186                | 8.0419 $\pm$ 2.2623                             | 0             | low                   |
| Adrenal gland       | 99                 | 6.0696 $\pm$ 2.0218                             | 0             | low                   |
| Lymph nodes         | 104                | 6.5961 $\pm$ 1.9084                             | 0             | low                   |

Supplementary Table 2-siRNA transfection efficiency RT-PCR  
 NAMPT; relate to Fig. 1c and Extended Data Fig. 3b,3c

|               | siNTC      | siNAPRT    | siNADSyn1  | siNAMPT    | siNMRK1    | siNMRK2    |
|---------------|------------|------------|------------|------------|------------|------------|
| NHA           | -0.4558045 | -0.4349248 | -0.4749749 | -2.0347422 | -0.5057958 | -0.6334649 |
| IMR90         | -0.6047295 | -0.654733  | -0.6348648 | -2.1842848 | -0.6349489 | -0.7046446 |
| RPE-1         | -0.6349492 | -0.6048482 | -0.6347494 | -2.1934749 | -0.7247925 | -0.7734723 |
| MCF10a        | -0.7746843 | -0.8046842 | -0.7746865 | -2.7947424 | -0.8049234 | -0.7173746 |
| HEK293T       | -0.6347422 | -0.6747925 | -0.8174725 | -2.9534375 | -0.8247948 | -0.6483042 |
| LE:K_562      | 0.63599146 | 0.6680757  | 0.64432004 | -2.5505082 | 0.6209333  | 0.63494742 |
| LE:SR         | 2.20481452 | 2.16002408 | 2.19683347 | -2.2404168 | 2.02507735 | 2.03534714 |
| RE:A498       | 2.07381993 | 1.98444747 | 2.12074181 | -2.0774003 | 2.14666917 | 2.036397   |
| RE:RXF_393    | 0.61878671 | 0.55719865 | 0.62168552 | -2.8664001 | 0.56865257 | 0.57516838 |
| GBM:U87       | 0.62752725 | 0.67943875 | 0.62845076 | -1.762254  | 0.59907102 | 0.73887996 |
| GBM:U87vIII   | 1.40900865 | 1.44250005 | 1.36587869 | -2.3926773 | 1.50268863 | 1.45542538 |
| GBM:GBM39     | 1.46791664 | 1.50709084 | 1.46352271 | -2.4053267 | 1.36767019 | 1.36990129 |
| GBM:GBM6      | 1.39148552 | 1.39793457 | 1.36194885 | -2.3889454 | 1.35937248 | 1.40819169 |
| CNS:SF_539    | -0.7977991 | -0.843745  | -0.7686007 | -1.7661788 | -0.7085772 | -0.6444941 |
| CNS:SNB_75    | -0.2557219 | -0.2679477 | -0.2210624 | -2.2738572 | -0.3064026 | -0.2483701 |
| CNS:SNB_19    | -0.9628197 | -0.9414868 | -0.9765771 | -1.9443015 | -0.8794605 | -0.914271  |
| CNS:U251      | -0.7938484 | -0.754974  | -0.7960201 | -1.6158485 | -0.810848  | -0.7254651 |
| CNS:SF_268    | -0.121718  | -0.1783419 | -0.0914275 | -2.0499411 | -0.0683235 | -0.0191303 |
| ME:MALME_3M   | 0.97674053 | 0.98170063 | 0.96913367 | -1.8114963 | 0.9672448  | 0.83871437 |
| ME:M14        | 1.0871972  | 1.11455474 | 1.05962851 | -1.672551  | 1.01534713 | 1.05641093 |
| ME:SK_MEL_5   | 0.55358985 | 0.58226845 | 0.54464198 | -2.052337  | 0.51089791 | 0.66135161 |
| ME:LOXIMVI    | 0.97177549 | 0.95425966 | 0.95244283 | -2.0390909 | 0.94094306 | 0.86396628 |
| ME:SK_MEL_2   | -0.1701256 | -0.1637077 | -0.1960523 | -2.2347031 | -0.1311622 | -0.1726729 |
| ME:UACC_257   | -0.340082  | -0.3323973 | -0.314714  | -2.3836775 | -0.3865795 | -0.3191738 |
| PR:PC3        | -0.643241  | -0.6794135 | -0.6370285 | -2.393901  | -0.7217924 | -0.6591123 |
| PR:LNCAP      | -0.8502926 | -0.8156116 | -0.8588217 | -2.3939677 | -0.8206317 | -0.7884228 |
| PR:DU_145     | -0.1514957 | -0.1691765 | -0.1251735 | -2.1503549 | -0.1735278 | -0.1950034 |
| BR: T47D      | -0.8815264 | -0.8836121 | -0.8388567 | -1.7306316 | -0.868459  | -0.8531236 |
| BR:Hs578T     | -0.6675724 | -0.668611  | -0.6808932 | -1.6330453 | -0.6093108 | -0.5538868 |
| BR:BT_549     | -0.2661794 | -0.2878722 | -0.3157215 | -1.888788  | -0.347807  | -0.428644  |
| BR:MDA_MB_231 | 1.45133944 | 1.3893533  | 1.45012876 | -1.9792776 | 1.32705075 | 1.45520194 |
| BR: MCF7      | 0.16368809 | 0.12778069 | 0.17678098 | -1.6979112 | 0.2053545  | 0.16392628 |
| LU:PC9        | -0.6075814 | -0.600563  | -0.6024835 | -1.846552  | -0.6692576 | -0.6231411 |
| LU:H23        | -0.7734006 | -0.7352185 | -0.7594192 | -1.9336768 | -0.7329954 | -0.7054083 |
| LU:H322M      | -0.9620018 | -0.9457566 | -0.9739204 | -1.9373235 | -0.9631579 | -0.9087864 |
| LU:H522       | -0.9280655 | -0.9147196 | -0.9449561 | -1.8374488 | -0.9117651 | -0.8477807 |
| LU:HOP62      | -0.6156568 | -0.5942034 | -0.6268383 | -1.7494009 | -0.623547  | -0.6687013 |
| LU:HOP92      | -0.5698488 | -0.5694621 | -0.5568734 | -1.4048476 | -0.6072761 | -0.6817043 |
| LU:H460       | 2.1613107  | 2.20797122 | 2.19189195 | -2.0425954 | 2.14893147 | 2.11704239 |
| LU:A549       | 1.72440875 | 1.74697874 | 1.60444321 | -2.0484738 | 1.5688674  | 1.6686942  |
| CO:HT29       | -0.5650881 | -0.5457533 | -0.5767888 | -1.8649424 | -0.5232166 | -0.6425976 |

|                |            |            |            |            |            |            |
|----------------|------------|------------|------------|------------|------------|------------|
| CO:COLO205     | -0.9589008 | -0.9583822 | -0.948189  | -1.9384947 | -0.9062361 | -0.9475593 |
| CO:HCC_2998    | -0.1362587 | -0.2263814 | -0.1147658 | -2.064094  | -0.254303  | -0.2050553 |
| CO:HCT_15      | -0.5958855 | -0.6289725 | -0.5809255 | -2.4440647 | -0.6869042 | -0.5254821 |
| CO:KM12        | -0.912356  | -0.9153208 | -0.9058566 | -1.8494407 | -0.9016327 | -0.910512  |
| CO:HCT_116     | 0.93453595 | 0.87723703 | 0.94836765 | -1.964945  | 0.84752271 | 0.98187403 |
| CO:SW_620      | 0.88464415 | 1.03090678 | 0.73418895 | -1.9094435 | 0.90886206 | 0.80444369 |
| OV:OVCAR_4     | -0.1749292 | -0.1823512 | -0.1138424 | -1.8407811 | -0.1945515 | -0.1813339 |
| OV:OVCAR_5     | -0.7620032 | -0.7442542 | -0.7369903 | -1.9155085 | -0.729407  | -0.800447  |
| OV:OVCAR_8     | -0.9239541 | -0.9189447 | -0.8876702 | -2.0248611 | -0.9052189 | -0.7671865 |
| OV:SK_OV_3     | -0.9851683 | -0.9783376 | -0.9611346 | -2.4804988 | -0.9824663 | -0.9480763 |
| OV:NCI_ADR_RES | -0.9795395 | -0.9848172 | -0.9780469 | -2.0484857 | -0.9399218 | -0.9188302 |
| PAN:CAPAN1     | -0.7808498 | -0.7541838 | -0.7960574 | -2.0497777 | -0.7594628 | -0.8049712 |
| PAN:CAPAN2     | -0.8886812 | -0.8638058 | -0.903693  | -1.9381852 | -0.9135011 | -0.8720525 |
| ESO:KYSE510    | -0.9968926 | -0.9826601 | -1.0041176 | -1.9855422 | -0.9236467 | -0.8374733 |
| ESO:KYSE140    | -0.9016451 | -0.9152873 | -0.9036069 | -1.494969  | -0.9081747 | -1.0163159 |
| H&N:BHY        | -0.9884911 | -0.9781435 | -0.9934418 | -2.1383537 | -0.9462933 | -0.9689458 |
| H&N:OE21       | -0.8336696 | -0.7919474 | -0.8253667 | -2.038686  | -0.8283644 | -0.8048477 |
| CER:HELA       | 1.40470901 | 1.30664192 | 1.48090439 | -2.3949982 | 1.48474323 | 1.30374643 |

Supplementary Table 2-siRNA transfection efficiency RT-PCR  
 NMRK1; relate to Fig. 1c and Extended Data Fig. 3b,3c

|             | siNTC      | siNAPRT    | siNADSyn1  | siNAMPT    | siNMRK1    | siNMRK2    |
|-------------|------------|------------|------------|------------|------------|------------|
| NHA         | -0.4558045 | -0.4349248 | -0.4749749 | -0.5057958 | -2.4294948 | -0.6334649 |
| IMR90       | -0.6047295 | -0.654733  | -0.6348648 | -0.6349489 | -2.6349489 | -0.7046446 |
| RPE-1       | -0.6349492 | -0.6048482 | -0.6347494 | -0.7247925 | -2.7247925 | -0.7734723 |
| MCF10a      | -0.7746843 | -0.8046842 | -0.7746865 | -0.8049234 | -2.8049234 | -0.7173746 |
| HEK293T     | -0.6347422 | -0.6747925 | -0.8174725 | -0.8247948 | -2.2247948 | -0.6483042 |
| LE:K_562    | -1.1945568 | -1.2001521 | -1.1891136 | -1.1721062 | -2.0294944 | -1.0603941 |
| LE:SR       | 1.07166057 | 1.07469323 | 1.11115401 | 1.00873614 | -2.2494543 | 1.34057101 |
| RE:A498     | 1.10293285 | 1.12630184 | 1.04254064 | 1.11984472 | -2.3235541 | 1.04295581 |
| RE:RXF_393  | 0.75582901 | 0.71034571 | 0.7230065  | 0.82033276 | -2.0077989 | 0.79013399 |
| GBM:U87     | 0.65753094 | 0.60323102 | 0.61886912 | 0.73858927 | -1.8987677 | 0.74020879 |
| GBM:U87vIII | 0.65544376 | 0.5106342  | 0.80875794 | 0.63344619 | -1.5724233 | 0.72487782 |
| GBM:GBM39   | 0.88749948 | 0.88622209 | 0.86917587 | 0.89066597 | -1.8987447 | 0.85298005 |
| GBM:GBM6    | 0.61624793 | 0.69219232 | 0.52072645 | 0.62508125 | -2.4209949 | 0.54833807 |
| CNS:SF_539  | 2.34010201 | 2.31250947 | 2.3355797  | 2.32851511 | -2.294396  | 2.33052357 |
| CNS:SNB_74  | 2.40426011 | 2.37152616 | 2.38419369 | 2.41230205 | -2.6311643 | 2.5887535  |
| CNS:SNB_19  | 2.08679849 | 2.13147628 | 2.08562207 | 2.00423686 | -2.2204189 | 2.03793848 |
| CNS:U251    | 1.53241822 | 1.56102825 | 1.50470228 | 1.5030839  | -1.8879621 | 1.64413687 |
| CNS:SF_268  | 1.50765047 | 1.47253293 | 1.42580565 | 1.59717687 | -2.8936736 | 1.48449114 |
| ME:MALME_   | 0.49166097 | 0.59551174 | 0.48375852 | 0.38649229 | -1.9513297 | 0.54917813 |
| ME:M14      | 1.44700034 | 1.41453296 | 1.4260248  | 1.47359654 | -1.5544229 | 1.39904908 |
| ME:SK_MEL   | 0.37664425 | 0.36820931 | 0.29939655 | 0.45597893 | -1.4880648 | 0.36937952 |
| ME:LOXIMV   | -0.0517595 | -0.0662184 | -0.0654811 | -0.0224752 | -2.7877291 | -0.0171815 |
| ME:SK_MEL   | -1.1601566 | -1.1635007 | -1.1526215 | -1.142713  | -2.1868803 | -1.2106804 |
| ME:UACC_2   | -0.9113097 | -0.9343867 | -0.9042176 | -0.8783223 | -2.4412105 | -0.8389033 |
| PR:PC3      | -0.409572  | -0.4272466 | -0.3507499 | -0.4435674 | -1.5858132 | -0.354946  |
| PR:LNCAP    | -1.0463036 | -1.0168479 | -1.0109077 | -1.0919285 | -2.4412324 | -1.0533967 |
| PR:DU_145   | 1.63816135 | 1.56337263 | 1.76473843 | 1.55467422 | -1.6157523 | 1.57819372 |
| BR: T47D    | 0.89923147 | 0.94902102 | 0.87008186 | 0.8619873  | -1.6412343 | 0.85534223 |
| BR:Hs578T   | -0.0615556 | -0.0663826 | -0.0378602 | -0.0794796 | -1.4022396 | -0.0511217 |
| BR:BT_549   | -1.2793593 | -1.2583288 | -1.2731183 | -1.2827777 | -2.2204077 | -1.4868286 |
| BR:MDA_ME   | -0.974448  | -0.9429676 | -0.9814622 | -0.9806551 | -2.2609297 | -0.9626238 |
| BR: MCF7    | -0.1241974 | -0.1330924 | -0.1261547 | -0.1109966 | -2.4465458 | -0.1340752 |
| LU:PC9      | -0.7667674 | -0.796032  | -0.7187216 | -0.771609  | -1.5840065 | -0.7559466 |
| LU:H23      | -0.5164236 | -0.5192893 | -0.547967  | -0.4720719 | -1.8443592 | -0.4733386 |
| LU:H322M    | -0.2783968 | -0.2650206 | -0.3308396 | -0.233668  | -1.6870204 | -0.2388699 |
| LU:H522     | -0.3671142 | -0.3941166 | -0.3600115 | -0.3403869 | -1.9111612 | 0.37749189 |
| LU:HOP62    | 0.31301452 | 0.30931081 | 0.30409503 | 0.3198663  | -2.5019765 | 0.37099319 |
| LU:HOP92    | 0.03435648 | 0.05169999 | -0.0678172 | 0.11943918 | -1.5369413 | 0.09773061 |
| LU:H460     | -0.0334391 | -0.0294059 | -0.0678179 | -0.0021652 | -1.4433807 | -0.028608  |
| LU:A549     | -1.1375021 | -1.1184192 | -1.1520875 | -1.120612  | -2.7924199 | -1.1482609 |
| CO:HT29     | -0.282985  | -0.2762208 | -0.2869644 | -0.2804477 | -1.4968917 | -0.2588749 |

|            |            |            |            |            |            |            |
|------------|------------|------------|------------|------------|------------|------------|
| CO:COLO20  | -0.143246  | -0.0524529 | -0.1092791 | -0.2657127 | -1.5101531 | -0.1504873 |
| CO:HCC_29  | 0.00675886 | 0.0221771  | -0.0216966 | 0.01990928 | -1.3912863 | 0.04110486 |
| CO:HCT_15  | 0.00728045 | 0.08843162 | -0.0366266 | -0.0297828 | -1.8473495 | -0.0288766 |
| CO:KM12    | 0.33054959 | 0.27227021 | 0.33026468 | 0.38298755 | -2.3829006 | 0.31751012 |
| CO:HCT_11  | -0.4696192 | -0.5266893 | -0.4018698 | -0.4720667 | -2.0564863 | -0.4494981 |
| CO:SW_620  | 0.50452409 | 0.59658375 | 0.55540041 | 0.35161392 | -2.3132689 | 0.34829614 |
| OV:OVCAR_  | 0.02169996 | -0.0146773 | 0.07731937 | 0.00158948 | -1.3032422 | 0.03432724 |
| OV:OVCAR_  | -1.2931143 | -1.2739532 | -1.2901404 | -1.2911079 | -2.1122426 | -1.1938069 |
| OV:OVCAR_  | -1.2900302 | -1.281146  | -1.2792307 | -1.2856906 | -2.3105818 | -1.2995526 |
| OV:SK_OV_  | 0.22795676 | 0.15452106 | 0.26090725 | 0.26395206 | -2.3126608 | 0.35649184 |
| OV:NCI_ADF | -1.2621371 | -1.2368418 | -1.2872166 | -1.2385463 | -2.2214537 | -1.3312232 |
| PAN:CAPAN  | -1.0873859 | -1.0834557 | -1.0819723 | -1.076444  | -2.4943593 | 1.19077321 |
| PAN:CAPAN  | -1.0600124 | -1.0759626 | -1.0175427 | -1.0670701 | -2.029574  | -1.0603941 |
| ESO:KYSE5  | -0.9838042 | -1.0086672 | -0.9363923 | -0.9883526 | -2.2976245 | -1.0340571 |
| ESO:KYSE14 | -0.9736149 | -0.9270098 | -1.0029396 | -0.9724669 | -2.3235146 | -0.9295581 |
| H&N:BHY    | -0.9842283 | -1.0087424 | -0.9371097 | -0.9888223 | -2.0077944 | -0.990134  |
| H&N:OE21   | -0.9690304 | -0.9423974 | -1.0109085 | -0.9353124 | -2.1898761 | -0.9402088 |
| CER:HELA   | -0.8051434 | -0.7987109 | -0.7652808 | -0.8367408 | -2.0216966 | -0.748943  |

Supplementary Table 2-siRNA transfection efficiency RT-PCR  
 NMRK2; relate to Fig. 1c and Extended Data Fig. 3b,3c

|             | siNTC      | siNAPRT    | siNADSyn1  | siNAMPT    | siNMRK1    | siNMRK2    |
|-------------|------------|------------|------------|------------|------------|------------|
| NHA         | -0.4558045 | -0.4349248 | -0.4749749 | -0.6334649 | -0.5057958 | -2.6334649 |
| IMR90       | -0.6047295 | -0.654733  | -0.6348648 | -0.7046446 | -0.6349489 | -2.7046446 |
| RPE-1       | -0.6349492 | -0.6048482 | -0.6347494 | -0.7734723 | -0.7247925 | -2.7734723 |
| MCF10a      | -0.7746843 | -0.8046842 | -0.7746865 | -0.7173746 | -0.8049234 | -2.7173746 |
| HEK293T     | -0.6347422 | -0.6747925 | -0.8174725 | -0.6483042 | -0.8247948 | -2.6483042 |
| LE:K_562    | 0.27582585 | 0.2460022  | 0.31705501 | 0.27915277 | 0.3115377  | -2.2092471 |
| LE:SR       | 2.26548485 | 2.34266999 | 2.26370318 | 2.28498339 | 2.40052521 | -2.3024833 |
| RE:A498     | -0.7938131 | -0.8234846 | -0.833933  | -0.7542767 | -0.7454069 | -2.0349761 |
| RE:RXF_393  | -0.9970044 | -1.1127052 | -1.0643068 | -0.8392577 | -0.9748279 | -2.2330041 |
| GBM:U87     | -0.8514183 | -0.8060223 | -1.0149958 | -0.7694516 | -0.9781812 | -2.4808766 |
| GBM:U87vIII | -0.8300377 | -0.7910603 | -0.9821124 | -0.7519342 | -0.7435898 | -1.9455173 |
| GBM:GBM39   | -0.8263967 | -0.8534405 | -0.9409509 | -0.7122084 | -0.9440196 | -1.971617  |
| GBM:GBM6    | -0.842861  | -0.7930141 | -0.9797786 | -0.7939714 | -0.9456694 | -1.8326211 |
| CNS:SF_539  | 1.17221263 | 1.23538527 | 1.16056025 | 1.16702944 | 1.1498746  | -2.1534788 |
| CNS:SNB_74  | 0.00588259 | 0.00918546 | -0.0155262 | 0.02514367 | -0.0744629 | -1.8162731 |
| CNS:SNB_19  | 1.2180474  | 1.16133235 | 1.27462856 | 1.28012364 | 1.02106988 | -2.0328816 |
| CNS:U251    | 0.16838005 | 0.16086569 | 0.15405702 | 0.20014913 | 0.17042022 | -2.0707749 |
| CNS:SF_268  | 1.08799705 | 1.0408446  | 1.19941864 | 1.07463871 | 1.36449787 | -2.5103336 |
| ME:MALME_   | 1.14638628 | 1.17117131 | 1.12763468 | 1.19163964 | 1.12663559 | -1.9847639 |
| ME:M14      | 1.24171582 | 1.2360749  | 1.3230273  | 1.2199222  | 1.27613073 | -1.9660772 |
| ME:SK_MEL   | 1.22634232 | 1.17438636 | 1.34759643 | 1.2145288  | 1.26941099 | -1.6564703 |
| ME:LOXIMV   | 2.52541333 | 2.43500748 | 2.1916682  | 2.37940389 | 2.94597791 | -2.3026641 |
| ME:SK_MEL   | 2.50827883 | 2.51708576 | 2.59296096 | 2.52571118 | 2.38737345 | -1.7121562 |
| ME:UACC_2   | 0.72510926 | 0.60995223 | 0.75708444 | 0.85737515 | 0.84645338 | -1.7130576 |
| PR:PC3      | -0.415933  | -0.4111359 | -0.4858312 | -0.3665807 | -0.4619854 | -1.3715816 |
| PR:LNCAP    | -1.2076262 | -1.111071  | -1.1626716 | -1.423011  | -1.3478619 | -2.9260799 |
| PR:DU_145   | -0.5157715 | -0.601691  | -0.5530898 | -0.4015645 | -0.6010723 | -1.9121069 |
| BR: T47D    | 1.03773319 | 1.19833917 | 1.24288301 | 1.18364609 | 1.28060167 | -1.8804191 |
| BR:Hs578T   | 0.4147869  | 0.4231719  | 0.4010109  | 0.43926865 | 0.4009015  | -1.4563846 |
| BR:BT_549   | 0.88762831 | 0.97118305 | 0.94640349 | 0.77074942 | 0.8572407  | -1.6185817 |
| BR:MDA_ME   | -0.4217589 | -0.2500404 | -0.4366131 | -0.6229829 | -0.5479745 | -1.5996789 |
| BR: MCF7    | 1.36094672 | 1.3219236  | 1.60703035 | 1.20777232 | 1.39974776 | -2.2895849 |
| LU:PC9      | -0.5851779 | -0.5042223 | -0.5969046 | -0.6931388 | -0.5636356 | -1.6531488 |
| LU:H23      | -0.8492904 | -0.9961864 | -0.932562  | -0.6317912 | -0.8585676 | -1.9544885 |
| LU:H322M    | -0.0164841 | -0.0131122 | -0.0264587 | -0.0105173 | -0.0260376 | -1.5970171 |
| LU:H522     | -0.2512556 | -0.2944595 | -0.2225666 | -0.2439393 | -0.2267797 | -1.7202459 |
| LU:HOP62    | -0.1539875 | -0.14061   | -0.1401155 | -0.1913361 | -0.1022882 | -1.9139754 |
| LU:HOP92    | -0.1857659 | -0.2341338 | -0.1177239 | -0.2113179 | -0.170871  | -1.9817617 |
| LU:H460     | 0.69929764 | 0.55940909 | 0.73253351 | 0.85741959 | 0.57929036 | -1.3422472 |
| LU:A549     | 0.52559888 | 0.50564149 | 0.52377769 | 0.57511411 | 0.53659692 | -0.6370902 |
| CO:HT29     | -0.1125582 | -0.0963749 | -0.1423018 | -0.1047797 | -0.1833661 | -2.1409193 |

|            |            |            |            |            |            |            |
|------------|------------|------------|------------|------------|------------|------------|
| CO:COLO20  | -0.0007435 | -0.0453215 | 0.06187842 | -0.0162034 | 0.05856819 | -1.6238966 |
| CO:HCC_29  | 0.11463016 | 0.16086387 | 0.0796609  | 0.10410746 | -0.0396167 | -1.3958949 |
| CO:HCT_15  | 0.1828943  | 0.16086386 | 0.21156363 | 0.18627421 | 0.13187054 | -1.2992819 |
| CO:KM12    | -0.5965413 | -0.7216697 | -0.5517345 | -0.5284663 | -0.6958219 | -1.8302984 |
| CO:HCT_11  | 0.12412117 | 0.12776276 | 0.13801147 | 0.11098081 | 0.1331039  | -1.8144188 |
| CO:SW_620  | 0.06835231 | 0.02348827 | 0.04674949 | 0.14607745 | 0.08489283 | -2.0590123 |
| OV:OVCAR_  | -0.6839474 | -0.7368013 | -0.7082424 | -0.6294666 | -0.7284002 | -1.7882182 |
| OV:OVCAR_  | -0.624852  | -0.6617508 | -0.6735084 | -0.5600057 | -0.705902  | -1.7406884 |
| OV:OVCAR_  | -0.7141631 | -0.8282422 | -0.7329627 | -0.5966199 | -0.8021951 | -1.7379129 |
| OV:SK_OV_  | -0.6734765 | -0.7931383 | -0.7022182 | -0.5370337 | -0.8922954 | -1.9621354 |
| OV:NCI_ADF | -0.7904417 | -0.8056336 | -0.8338057 | -0.7639275 | -0.6475545 | -1.6947242 |
| PAN:CAPAN  | -1.2665194 | -1.1655584 | -1.3116128 | -1.3939157 | -1.396773  | -2.6326295 |
| PAN:CAPAN  | -1.1399122 | -1.1502659 | -1.1461906 | -1.1748065 | -1.4846294 | -2.925383  |
| ESO:KYSE5  | -1.1163729 | -1.0437203 | -1.1296901 | -1.2380199 | -1.284749  | -2.137353  |
| ESO:KYSE1  | -1.0510369 | -0.9894255 | -1.0641979 | -1.1571028 | -1.1047464 | -2.3916393 |
| H&N:BHY    | -0.9906319 | -0.9066031 | -1.0146583 | -1.1080539 | -1.283632  | -2.301683  |
| H&N:OE21   | -0.9228538 | -0.7387034 | -1.031271  | -1.0623103 | -1.0836352 | -2.3102731 |
| CER:HELA   | -1.0544331 | -0.9730115 | -1.1523589 | -1.0932235 | -1.1362934 | -2.1037352 |

Supplementary Table 2-siRNA transfection efficiency RT-PCR NAPRT;  
relate to Fig. 1c and Extended Data Fig. 3b,3c

|               | siNTC      | siNAPRT    | siNADSyn1  | siNAMPT    | siNMRK1    | siNMRK2    |
|---------------|------------|------------|------------|------------|------------|------------|
| NHA           | -0.3554954 | -2.3204243 | -0.3884749 | -0.3047464 | -0.3064648 | -0.2836352 |
| IMR90         | -0.634649  | -1.9470343 | -0.6353994 | -0.6732468 | -0.6248375 | -0.7273636 |
| RPE-1         | -0.692439  | -1.7944934 | -0.7349034 | -0.7049348 | -0.7634749 | -0.7243749 |
| MCF10a        | -0.728354  | -2.4034306 | -0.8440381 | -0.7044284 | -0.7346864 | -0.7173746 |
| HEK293T       | -0.8479434 | -2.2349892 | -0.8043579 | -0.8246443 | -0.8736846 | -0.8246472 |
| LE:K_562      | -0.6613338 | -2.2714536 | -0.6411901 | -0.6590241 | -0.6188316 | -0.6260234 |
| LE:SR         | -0.9743029 | -2.1531828 | -0.9574625 | -0.994335  | -0.9534857 | -0.9047498 |
| RE:A498       | -0.6421946 | -2.543803  | -0.6409233 | -0.6196901 | -0.6261493 | -0.6287573 |
| RE:RXF_393    | -1.0531093 | -2.2444592 | -1.0463591 | -1.0487517 | -1.0312403 | -1.0461064 |
| GBM:U87       | -1.0437879 | -2.4647945 | -1.01173   | -1.0523426 | -1.1419847 | -1.1793947 |
| GBM:U87vIII   | -1.0534162 | -2.8476795 | -1.0440993 | -1.0488348 | -1.0375409 | -1.0439368 |
| GBM:GBM39     | -1.0515405 | -2.7390088 | -1.045544  | -1.0505063 | -1.1267435 | -1.0004655 |
| GBM:GBM6      | -1.0468787 | -2.4342261 | -1.0419241 | -1.0450028 | -1.018829  | -1.0659601 |
| CNS:SF_539    | -1.0545145 | -2.0844212 | -1.0478364 | -1.0518608 | -1.0602849 | -1.0761341 |
| CNS:SNB_75    | -0.9430524 | -2.0939235 | -0.9276661 | -0.9447289 | -0.9307092 | -0.9383683 |
| CNS:SNB_19    | -1.0026913 | -2.1970352 | -1.0007578 | -0.9915302 | -1.1296866 | -0.985848  |
| CNS:U251      | -1.0419515 | -2.0474034 | -1.0348596 | -1.0378305 | -1.244801  | -1.1246163 |
| CNS:SF_268    | -1.0403758 | -2.2420326 | -1.0361574 | -1.0353184 | -1.0364577 | -1.1398249 |
| ME:MALME_3M   | -1.0511134 | -2.0374046 | -1.0446381 | -1.0463554 | -1.033163  | -1.0438126 |
| ME:M14        | -0.3074448 | -2.6247322 | -0.3033688 | -0.3275276 | -0.3726536 | -0.2736448 |
| ME:SK_MEL_5   | -0.9398422 | -2.4403754 | -0.9525279 | -0.917563  | -0.9348879 | -0.9568742 |
| ME:LOXIMVI    | -0.3795636 | -2.5383676 | -0.3826656 | -0.3671737 | -0.378832  | -0.3784876 |
| ME:SK_MEL_2   | -0.8184022 | -2.3936364 | -0.7579058 | -0.8177452 | -0.8464261 | -0.8278713 |
| ME:UACC_257   | 0.5068416  | -2.2630367 | 0.45009904 | 0.49337009 | 0.45615087 | 0.4985724  |
| PR:PC3        | 1.13861078 | -2.4038324 | 1.10923177 | 1.15969455 | 1.1416392  | 1.19042636 |
| PR:LNCAP      | -0.2348233 | -2.4404841 | -0.2527549 | -0.2094044 | 0.25097586 | -0.2974958 |
| PR:DU_145     | 0.17271323 | -2.084731  | 0.16267534 | 0.11153861 | 0.13642001 | 0.16523692 |
| BR: T47D      | -1.1149114 | -2.2937044 | -1.0703019 | -1.2231689 | -1.1766937 | -1.013682  |
| BR:Hs578T     | 0.86569225 | -2.40483   | 0.85688045 | 0.83014226 | 0.85241514 | 0.87248632 |
| BR:BT_549     | 0.30756557 | -1.8336656 | 0.32058422 | 0.27653903 | 0.36282324 | 0.21094498 |
| BR:MDA_MB_231 | -1.044551  | -2.304484  | -1.0518111 | -1.0161483 | -1.0725377 | -1.0750861 |
| BR: MCF7      | 0.9037695  | -2.0484345 | 0.9031826  | 0.8837465  | 0.9571398  | 0.8224597  |
| LU:PC9        | 1.12992749 | -2.4948868 | 1.12504779 | 1.09447551 | 1.18652642 | 1.09749847 |
| LU:H23        | 1.79738785 | -2.4949481 | 1.7763311  | 1.72884176 | 1.5936343  | 1.84789516 |
| LU:H322M      | 1.10624341 | -2.4634427 | 1.1152343  | 1.09136642 | 1.29781785 | 1.03710134 |
| LU:H522       | 0.76455236 | -2.3038475 | 0.75409129 | 0.75528486 | 0.75326824 | 0.74731476 |
| LU:HOP62      | 0.56647015 | -2.3984748 | 0.56871063 | 0.56263774 | 0.54075637 | 0.51101693 |
| LU:HOP92      | 1.18525449 | -2.0474649 | 1.16869783 | 1.19598972 | 1.12251159 | 1.14314882 |
| LU:H460       | -0.9855728 | -1.9440948 | -0.9959233 | -0.9802954 | -1.0554091 | -0.9605376 |
| LU:A549       | -0.9824921 | -2.0383052 | -0.968858  | -0.9943545 | -0.9333264 | -0.9263651 |
| CO:HT29       | 2.1372623  | -1.3837427 | 2.12023396 | 2.14777131 | 2.35723884 | 2.13970158 |



|               |            |            |            |            |            |            |
|---------------|------------|------------|------------|------------|------------|------------|
| CO:COLO205    | 1.72403799 | -2.0388052 | 1.79852054 | 1.68315486 | 1.61984732 | 1.63091645 |
| CO:HCC_2998   | 1.45556765 | -1.5244848 | 1.49319296 | 1.31925445 | 1.46688956 | 1.27651085 |
| CO:HCT_15     | 1.29994454 | -2.2754489 | 1.2478308  | 1.35247096 | 1.2395657  | 1.26106523 |
| CO:KM12       | 1.11152129 | -2.1494747 | 1.03598163 | 1.1663048  | 1.01641024 | 1.15685562 |
| CO:HCT_116    | -0.9247747 | -1.3844067 | -0.8972064 | -0.9632147 | -0.8594607 | -0.9832151 |
| CO:SW_620     | -0.9185325 | -1.8474047 | -0.9330905 | -0.9062695 | -0.9485823 | -0.9045924 |
| OV:OVCAR_4    | 1.50486879 | -2.4840375 | 1.54814772 | 1.4537543  | 1.37525252 | 1.51449186 |
| OV:OVCAR_5    | 1.11278635 | -2.0484311 | 1.05419996 | 1.19604219 | 1.17601404 | 1.18825835 |
| OV:OVCAR_8    | 1.52009113 | -1.6374742 | 1.53945847 | 1.51088535 | 1.36239078 | 1.48714811 |
| OV:SK_OV_3    | 0.71071003 | -2.3847469 | 0.68649176 | 0.75273076 | 0.70055205 | 0.74473271 |
| OV:NCI_ADR_RE | 0.93487732 | -1.846473  | 0.99470635 | 0.87682652 | 0.91874326 | 0.80898584 |
| PAN:CAPAN1    | -0.0763381 | -2.047495  | -0.1388064 | -0.0414523 | -0.0619988 | -0.0362472 |
| PAN:CAPAN2    | -0.2932627 | -2.4949845 | -0.2533002 | -0.3165453 | -0.2604067 | -0.3259845 |
| ESO:KYSE510   | -0.0390024 | -1.8647635 | -0.0243066 | -0.0999267 | -0.029801  | -0.0916362 |
| ESO:KYSE140   | -0.3005638 | -2.3536485 | -0.3029227 | -0.2389146 | -0.2937738 | -0.3084236 |
| H&N:BHY       | -0.4091197 | -2.2837474 | -0.4168767 | -0.3500374 | -0.472933  | -0.3248658 |
| H&N:OE21      | -0.0650097 | -1.7366404 | -0.0952425 | -0.0509618 | -0.0481937 | -0.0482829 |
| CER:HELA      | -0.8845098 | -1.9148456 | -0.8447508 | -0.8748511 | -0.7937367 | -0.8203737 |

Supplementary Table 2-siRNA transfection efficiency RT-PCR  
 NADSYN1; relate to Fig. 1c and Extended Data Fig. 3b,3c

|               | siNTC      | siNAPRT    | siNADSyn1  | siNAMPT    | siNMRK1    | siNMRK2    |
|---------------|------------|------------|------------|------------|------------|------------|
| NHA           | -0.6493845 | -0.6747294 | -2.428402  | -0.6743729 | -0.7249492 | -0.7734648 |
| IMR90         | -0.7349248 | -0.7447297 | -2.140384  | -0.7472837 | -0.7947923 | -0.7524682 |
| RPE-1         | -0.7446823 | -0.8047924 | -2.4038445 | -0.7947975 | -0.8249423 | -0.7846823 |
| MCF10a        | -0.7847948 | -0.8247924 | -2.0942847 | -0.8249284 | -0.8047949 | -0.8247974 |
| HEK293T       | -0.6742984 | -0.7349248 | -2.2348305 | -0.6347949 | -0.7048642 | -0.8048742 |
| LE:K_562      | -0.68105   | -0.6279646 | -1.4999688 | -0.6934593 | -0.6423821 | -0.6031397 |
| LE:SR         | -0.7937185 | -0.7014483 | -1.7349494 | -0.8616593 | -0.7044453 | -0.7439842 |
| RE:A498       | -1.2895092 | -1.2891537 | -2.7336301 | -1.2509609 | -1.2049713 | -1.1777448 |
| RE:RXF_393    | -0.6160305 | -0.60835   | -1.7303834 | -0.5514105 | -0.5976249 | -0.638459  |
| GBM:U87       | -0.5773678 | -0.558575  | -1.7363088 | -0.5741896 | -0.6064033 | -0.5869482 |
| GBM:U87vIII   | -0.7291209 | -0.7552502 | -1.6393711 | -0.7128857 | -0.6913178 | -0.6740279 |
| GBM:GBM39     | -0.589425  | -0.5447543 | -1.9336672 | -0.5975532 | -0.51809   | -0.569177  |
| GBM:GBM6      | -0.229855  | -0.1925391 | -2.3303731 | -0.1887897 | -0.1650087 | -0.176083  |
| CNS:SF_539    | -1.1296879 | -1.1213079 | -2.2839327 | -1.1352551 | -1.1228809 | -1.1940971 |
| CNS:SNB_75    | -0.9708905 | -0.9883606 | -2.0373704 | -0.9894612 | -0.9588643 | -0.9144666 |
| CNS:SNB_19    | -1.2944479 | -1.3014122 | -2.7363623 | -1.251284  | -1.3568885 | -1.1695754 |
| CNS:U251      | -0.975941  | -0.9533949 | -1.837376  | -0.9894195 | -0.9328112 | -0.9606592 |
| CNS:SF_268    | -0.4428482 | -0.4560436 | -1.8363635 | -0.4138317 | -0.374583  | -0.4122043 |
| ME:MALME_3M   | -1.2998966 | -1.2892426 | -2.3394284 | -1.2469762 | -1.3289721 | -1.2827292 |
| ME:M14        | -0.4500063 | -0.4807772 | -1.3993736 | -0.3749118 | -0.4501989 | -0.3236345 |
| ME:SK_MEL_5   | 0.31034468 | 0.29962974 | -2.0283731 | 0.30170549 | 0.25920769 | 0.35359161 |
| ME:LOXIMVI    | -0.4351241 | -0.4284216 | -1.393817  | -0.4259395 | -0.4339506 | -0.4572041 |
| ME:SK_MEL_2   | -1.1649724 | -1.1793745 | -2.148451  | -1.1456547 | -1.1380632 | -1.1389601 |
| ME:UACC_257   | 0.33991668 | 0.3301446  | -2.3003867 | 0.38524237 | 0.41960357 | 0.36126648 |
| PR:PC3        | 0.15042226 | 0.18683497 | -2.4848127 | 0.09783166 | 0.19433742 | 0.08392362 |
| PR:LNCAP      | 0.27280557 | 0.39229422 | -2.048422  | 0.13427701 | 0.39126261 | 0.16231346 |
| PR:DU_145     | -0.0336928 | 0.11649286 | -2.0849436 | -0.0830653 | 0.19277831 | -0.0735675 |
| BR: T47D      | -0.7922976 | -0.8103865 | -2.030426  | -0.7812969 | -0.774764  | -0.7635759 |
| BR:Hs578T     | 0.57768478 | 0.56728759 | -1.7383166 | 0.58207162 | 0.62766427 | 0.63234435 |
| BR:BT_549     | -0.9846019 | -0.9820042 | -2.3633994 | -0.9894064 | -1.0681066 | -0.9397253 |
| BR:MDA_MB_231 | -0.780678  | -0.7654679 | -2.0790493 | -0.7550518 | -0.8266552 | -0.8029105 |
| BR: MCF7      | 0.02542598 | 0.02300801 | -2.3383186 | 0.02109205 | 0.06960254 | 0.02775175 |
| LU:PC9        | 0.36930703 | 0.36482935 | -2.39398   | 0.37984573 | 0.39952969 | 0.35215941 |
| LU:H23        | 0.35180752 | 0.39045078 | -1.2739642 | 0.27994486 | 0.40869978 | 0.21714866 |
| LU:H322M      | -0.0151377 | -0.0151779 | -2.1732949 | 0.04244991 | -0.0273554 | 0.0698618  |
| LU:H522       | -0.0992024 | -0.083399  | -2.3365199 | -0.087751  | -0.039845  | -0.0881548 |
| LU:HOP62      | 0.17365868 | 0.18017106 | -2.2499456 | 0.12515932 | 0.22781539 | 0.17846319 |
| LU:HOP92      | -0.1935759 | -0.2398237 | -2.2743484 | -0.1628853 | -0.2746326 | -0.1782663 |
| LU:H460       | -0.4222352 | -0.4193044 | -2.8373564 | -0.4237015 | -0.5000863 | -0.4988212 |
| LU:A549       | -1.1428591 | -1.1841592 | -2.4944832 | -1.1151895 | -1.1277549 | -1.1782758 |
| CO:HT29       | 0.75270371 | 0.63210442 | -1.8039948 | 0.72216203 | 0.58451685 | 0.6110269  |

|                |            |            |            |            |            |            |
|----------------|------------|------------|------------|------------|------------|------------|
| CO:COLO205     | 0.29742159 | 0.18049329 | -2.3241247 | 0.29177322 | 0.18112334 | 0.14889639 |
| CO:HCC_2998    | 0.09876386 | 0.07501275 | -2.2630404 | 0.05226615 | 0.02719939 | 0.01662047 |
| CO:HCT_15      | 0.99558124 | 0.98096717 | -1.8043909 | 0.98962088 | 0.96945795 | 0.94856886 |
| CO:KM12        | 0.45759931 | 0.40357621 | -2.0494926 | 0.44347465 | -0.5770272 | 0.51285617 |
| CO:HCT_116     | -0.4347337 | -0.4088132 | -1.4858094 | -0.4596069 | -0.4230981 | -0.4118909 |
| CO:SW_620      | 0.19000931 | 0.13072571 | -2.0003595 | 0.20058331 | 0.13866381 | 0.12301172 |
| OV:OVCAR_4     | 0.31497877 | 0.39958939 | -1.4928986 | 0.27994031 | 0.35666908 | 0.40664862 |
| OV:OVCAR_5     | 0.31667024 | 0.29515781 | -1.4500404 | 0.33438    | 0.27660093 | 0.35407825 |
| OV:OVCAR_8     | 0.017774   | 0.03626744 | -1.8340406 | 0.04574812 | 0.0373361  | 0.04337986 |
| OV:SK_OV_3     | 0.03563862 | -0.0200342 | -1.8335674 | 0.10429922 | -0.0109503 | 0.10014291 |
| OV:NCI_ADR_RES | -0.0269538 | -0.0350572 | -1.9539335 | -0.0393428 | -0.034049  | -0.0188926 |
| PAN:CAPAN1     | 0.17049546 | 0.00052188 | -1.4303335 | 0.10218671 | -0.0004087 | 0.11281225 |
| PAN:CAPAN2     | 0.61797015 | 0.60216357 | -1.7020004 | 0.54040652 | 0.63795006 | 0.57589495 |
| ESO:KYSE510    | 2.07335683 | 2.05881821 | -1.1034253 | 2.50272332 | 2.91661384 | 2.87225469 |
| ESO:KYSE140    | 2.50645459 | 2.60728217 | -0.5679074 | 2.30105047 | 2.25722381 | 2.31269746 |
| H&N:BHY        | 2.15793147 | 2.06634189 | -0.9857567 | 2.35934292 | 2.04226207 | 2.3510209  |
| H&N:OE21       | 2.51644661 | 2.54142205 | -2.3342151 | 2.62364461 | 2.497503   | 2.49374    |
| CER:HELA       | -1.0799046 | -1.0423625 | -2.1949499 | -1.0048776 | -1.0194844 | -1.0346465 |

Supplementary Table 3-Known motif discovery analysis of NAMPT enhancer using TRANSFAC relate to Figs. 3d, 3e and Extended Data Figs. 5d, 5e

| Matrix           | Factor name     | Position (strand) | Core score | Matrix score | Sequence               |
|------------------|-----------------|-------------------|------------|--------------|------------------------|
| A\$CGD2          | Cgd2            | 2 (+)             | 0.808      | 0.849        | agacACATGcacat         |
| V\$OCT2_04       | OCT_2           | 6 (+)             | 1          | 0.972        | acATGCACatg            |
| V\$DEC1_Q2       | DEC_1           | 10 (-)            | 0.965      | 0.934        | gcaCATGTgtg            |
| V\$TEAD4CEBPB_01 | TEF-3:C/EBPbeta | 12 (-)            | 0.686      | 0.733        | acatgtgtgtttattgCGGCAC |
| V\$MEQ_01        | MEQ             | 14 (-)            | 1          | 1            | aTGTGTgtt              |
| V\$GCM1CEBPB_01  | GCMa:C/EBPbeta  | 14 (+)            | 1          | 0.78         | atgtgtgtttaTTGCGgcac   |
| V\$XFD2_01       | XFD-2           | 15 (-)            | 1          | 0.934        | tgtgtgTTTATtgc         |
| F\$TEA1_01       | Tea1p           | 16 (-)            | 0.776      | 0.754        | gtgtgTTTATtgcggcacta   |
| V\$RUNX2_02      | RUNX2           | 16 (-)            | 0.881      | 0.788        | gtgtgtttattGCGGCac     |
| P\$AT1G53910_02  | AT1G53910       | 16 (+)            | 1          | 0.788        | gtgtgtttattGCGGCactat  |
| V\$FOXP1_06      | FOXP1           | 17 (+)            | 1          | 0.996        | tgTGTTTat              |
| I\$MIRR_01       | mirr            | 19 (-)            | 1          | 1            | TGTTT                  |
| V\$FOXC1_06      | Foxc1           | 19 (-)            | 1          | 1            | TGTTTat                |
| V\$FOXM1_Q3_02   | FOXM1           | 19 (+)            | 1          | 0.997        | TGTTTattg              |
| V\$HOXD9_02      | Hoxd9           | 19 (-)            | 1          | 0.95         | tgTTTATtgc             |
| V\$CEBP_C        | C/EBPalpha      | 19 (-)            | 1          | 0.916        | tgtttATTGCggcactat     |
| F\$YBR239C_01    | Ybr239c         | 19 (+)            | 0.796      | 0.766        | tgtttatTGCGGcactattc   |
| V\$CDX1_03       | CDX1            | 20 (-)            | 1          | 0.992        | gTTTATtgc              |
| V\$CDX2_05       | Cdx-2           | 20 (+)            | 1          | 0.957        | gtttATTGCggc           |
| V\$CDX1_Q5       | Cdx-1           | 21 (+)            | 1          | 1            | TTTATt                 |
| I\$CAD_01        | cad             | 21 (+)            | 1          | 1            | TTTATtg                |
| I\$CG4328_01     | CG4328          | 21 (+)            | 1          | 1            | tTTATTg                |
| V\$CEBPD_Q6      | C/EBPdelta      | 23 (+)            | 1          | 0.957        | tATTGCggcact           |
| P\$ERF11_01      | ERF11           | 24 (-)            | 0.981      | 0.966        | attgCGGCAC             |
| P\$RRTF1_02      | RRTF1           | 25 (-)            | 0.815      | 0.805        | ttgCGGCAct             |
| P\$AT1G68550_03  | AT1G68550       | 25 (+)            | 0.946      | 0.946        | ttgCGGCAC              |
| P\$ERF098_01     | ERF098          | 26 (-)            | 1          | 0.897        | tGCGGCac               |
| P\$HSFA4A_01     | HSFA4A          | 32 (+)            | 1          | 1            | aCTATT                 |
| P\$GT1_Q6        | GT-1            | 34 (-)            | 1          | 1            | taTTCAC                |

|                  |                   |         |       |       |                      |
|------------------|-------------------|---------|-------|-------|----------------------|
| V\$SRY_12        | SRY               | 38 (+)  | 1     | 0.99  | cACAATag             |
| V\$SRY_10        | SRY               | 39 (+)  | 0.602 | 0.746 | acaatagCAAAGa        |
| V\$NFIA_02       | NF-1A             | 53 (+)  | 0.894 | 0.91  | TTGGAaccaaccac       |
| P\$TCP7_01       | TCP7              | 53 (-)  | 0.854 | 0.822 | ttggaaCCAAC          |
| P\$CBF3_02       | CBF3              | 58 (+)  | 0.796 | 0.805 | accaaCCACatgt        |
| V\$ZNF777_02     | ZNF777            | 61 (+)  | 0.557 | 0.717 | aaccCaCATGTccatcaat  |
| P\$ASR1_01       | ASR-1             | 62 (+)  | 1     | 1     | ACCCA                |
| V\$EGR3_Q3       | egr-3             | 62 (-)  | 1     | 1     | aCCCAC               |
| V\$DEC1_Q3       | 1-Dec             | 62 (+)  | 0.983 | 0.967 | acccACATGtcc         |
| V\$DEC1_Q2       | 1-Dec             | 63 (+)  | 0.965 | 0.948 | cccACATGtcc          |
| V\$CUX1TBX21_01  | CDP:T-bet         | 63 (+)  | 0.969 | 0.825 | cccacatgtccATCAAtg   |
| V\$PBX1_04       | Pbx1              | 68 (+)  | 1     | 0.954 | atgtccATCAAtgatag    |
| V\$CDPCR1_01     | CDP               | 71 (-)  | 0.929 | 0.916 | tccaTCAATg           |
| V\$CUX1HOXA13_01 | CDP:HOXA13        | 74 (+)  | 0.876 | 0.764 | aTCAATgatagactgga    |
| V\$CUX1_05       | CDP               | 74 (+)  | 0.547 | 0.785 | atcaatgatagaCTGGAt   |
| I\$OPTIX_01      | Optix             | 79 (+)  | 1     | 1     | TGATA                |
| V\$IPF1_07       | ipf1              | 79 (+)  | 0.929 | 0.867 | TGATAgact            |
| F\$FZF1_01       | FZF1              | 79 (-)  | 1     | 1     | tGATAG               |
| V\$TCF1_07       | TCF1              | 82 (+)  | 1     | 0.992 | tagactgGATTAAa       |
| V\$CRX_06        | Crx               | 83 (+)  | 1     | 0.972 | agactgGATTAA         |
| V\$DMBX1_02      | DMBX1             | 86 (+)  | 1     | 0.995 | ctgGATTAAa           |
| V\$GTF2IRD1_01   | GTF2IRD1-isoform2 | 87 (+)  | 1     | 0.959 | tgGATTAAa            |
| I\$GSC_01        | Gsc               | 88 (-)  | 1     | 1     | gGATTA               |
| I\$PTX1_01       | Ptx1              | 88 (-)  | 1     | 1     | gGATTAA              |
| I\$BCD_02        | bcd               | 88 (-)  | 1     | 1     | gGATTA               |
| I\$OC_01         | oc                | 88 (-)  | 1     | 1     | gGATTA               |
| I\$BCD_04        | BCD               | 88 (-)  | 1     | 1     | gGATTAA              |
| V\$CRX_Q4_01     | CRX               | 89 (-)  | 1     | 1     | GATTAA               |
| V\$LHX3_Q3       | LHX3              | 90 (+)  | 1     | 1     | ATTAAa               |
| F\$RAP1_01       | RAP1              | 104 (-) | 1     | 0.826 | gcacatatACACCatggaat |
| V\$NFAT2_02      | NFAT2c1dimer      | 113 (+) | 1     | 0.837 | caccaTGGAAt          |
| P\$SPL1_01       | SPL1              | 124 (+) | 0.847 | 0.774 | acTGTACagc           |
| P\$SPL1_01       | SPL1              | 124 (-) | 0.847 | 0.772 | actGTACAgc           |

|                     |             |         |       |       |                   |
|---------------------|-------------|---------|-------|-------|-------------------|
| V\$CDX2_01          | Cdx-2       | 128 (+) | 1     | 0.947 | tacagccATAAAaatg  |
| V\$CDX2_05          | Cdx-2       | 129 (-) | 0.948 | 0.964 | acaGCCATaaaa      |
| I\$ABDB_01          | Abd-B       | 129 (-) | 1     | 0.985 | acagccATAAAaat    |
| V\$HOXA9_01         | hoxa9       | 129 (+) | 1     | 0.97  | acagccATAAAaatgga |
| V\$EVX2_05          | EVX2        | 129 (-) | 1     | 0.996 | acagccATAAAA      |
| V\$EVX2_06          | Evx2        | 129 (-) | 1     | 0.995 | acagccATAAAA      |
| V\$EVX2_07          | EVX2        | 129 (-) | 1     | 0.997 | acagccATAAAA      |
| V\$CDX2_06          | Cdx-2       | 129 (-) | 1     | 0.992 | acagccATAAAA      |
| V\$EVX2_08          | Evx2        | 129 (-) | 1     | 0.997 | acagccATAAAA      |
| V\$CDX2_04          | Cdx-2       | 130 (+) | 1     | 0.998 | cagccATAAAA       |
| V\$CDX2_Q5          | Cdx-2       | 131 (-) | 1     | 0.941 | agccATAAAaatgg    |
| V\$HOXA10_04        | HOXA10      | 131 (+) | 1     | 0.963 | agccATAAAA        |
| V\$HOXC11_04        | HOXC11      | 131 (+) | 1     | 0.995 | agccATAAAA        |
| V\$HOXD11_04        | HOXD11      | 131 (+) | 1     | 0.969 | agccATAAAA        |
| V\$HOXA11_04        | Hoxa11      | 131 (+) | 1     | 0.998 | agccATAAAA        |
| I\$CAD_02           | CAD         | 131 (+) | 1     | 0.994 | agccATAAAA        |
| V\$HOXC9_04         | HOXC9       | 131 (-) | 1     | 0.993 | agccATAAAA        |
| V\$CDX2_03          | Cdx-2       | 132 (+) | 1     | 0.989 | gccATAAAA         |
| V\$HOXC10_03        | HOXC10      | 132 (+) | 1     | 0.996 | gccATAAAA         |
| V\$HOXC10_04        | HOXC10      | 132 (+) | 1     | 0.972 | gccATAAAA         |
| V\$HOXD9_01         | Hoxd9       | 132 (+) | 1     | 0.99  | gccATAAAA         |
| V\$CUX1HOXB13_01    | CDP:HOXB13  | 132 (+) | 0.917 | 0.94  | gccataaaaATGGAtg  |
| V\$HOXB13ONECUT2_01 | HOXB13:OC-2 | 132 (+) | 0.945 | 0.948 | gccataaaaATGGAtg  |
| V\$CDPCR3_01        | CDP         | 133 (-) | 1     | 0.87  | CCATAaaaatggatg   |
| I\$CAD_Q6           | CAD         | 133 (-) | 1     | 0.987 | ccATAAAaat        |
| I\$ABDB_Q6          | Abd-B       | 134 (+) | 1     | 1     | cATAAAA           |
| V\$YY1_Q4_01        | YY1         | 134 (+) | 1     | 0.987 | cataaaaAATGGatga  |
| V\$HOXA13_01        | HOXA13      | 135 (+) | 1     | 1     | ATAAAA            |
| V\$SATB1_Q5_01      | SATB1       | 135 (-) | 1     | 1     | ATAAAA            |
| V\$YY1_Q6_03        | YY1         | 138 (-) | 1     | 1     | aaAATGG           |
| I\$PRD_03           | Prd         | 139 (-) | 0.969 | 0.911 | aaaTGGATga        |
| V\$POU3F2_01        | POU3F2      | 141 (+) | 1     | 0.87  | atggatgagTTCAT    |
| V\$PRDM16_04        | MEL1        | 144 (+) | 1     | 1     | GATGAg            |

|                  |            |         |       |       |                          |
|------------------|------------|---------|-------|-------|--------------------------|
| V\$MEQCJUN_02    | MEQ:c-Jun  | 144 (+) | 0.716 | 0.836 | gatgAGTTCat              |
| V\$VDR_02        | VDR        | 146 (+) | 1     | 1     | tgaGTTCA                 |
| V\$RXRA_06       | RXRA       | 147 (-) | 0.862 | 0.812 | gaGTTCAgtcctt            |
| V\$RXRA_06       | RXRA       | 147 (+) | 0.812 | 0.804 | gagttcaTGTCctt           |
| V\$SOX9_Q5       | Sox-9      | 152 (-) | 1     | 0.966 | catgtccTTTGTaggga        |
| V\$SOX9_Q4       | Sox-9      | 155 (-) | 1     | 0.979 | gtcCTTTGtag              |
| V\$SOX2_08       | Sox-2      | 155 (+) | 1     | 0.957 | gtccTTTGTaggg            |
| V\$ZNF214_04     | ZNF214     | 156 (+) | 0.855 | 0.868 | tcctttgtagggacaTGGATga   |
| V\$TCF1_Q5_01    | TCF-1      | 157 (-) | 1     | 0.988 | cCTTTGtaggga             |
| P\$SPL15_01      | SPL15      | 157 (+) | 0.795 | 0.843 | cctttGTAGGgaca           |
| V\$TCF1_Q5       | TCF-1      | 158 (+) | 1     | 1     | CTTTGt                   |
| V\$SOX10_Q6_01   | Sox-10     | 158 (-) | 1     | 1     | cTTTGTa                  |
| V\$SOX10_01      | Sox-10     | 158 (+) | 1     | 1     | cTTTGT                   |
| P\$SPL5_02       | SPL5       | 158 (+) | 0.8   | 0.853 | ctttGTAGGgac             |
| P\$BHLH28_01     | bHLH28     | 158 (+) | 0.8   | 0.836 | ctttGTAGGgac             |
| P\$SPL3_01       | SPL3       | 161 (-) | 0.8   | 0.839 | tgTAGGGa                 |
| V\$HELIOSA_01    | Helios     | 161 (+) | 1     | 0.986 | tgtAGGGAcac              |
| V\$PIT1_Q6       | Pit-1      | 163 (-) | 1     | 0.888 | tagggacatggATGAAGc       |
| V\$P54NRB_Q5     | p54NRB     | 166 (+) | 1     | 0.887 | ggacatGGATGaagctggc      |
| V\$CUX1TBX21_01  | CDP:T-bet  | 169 (-) | 0.922 | 0.769 | caTGGATgaagctggcaa       |
| V\$CUX1HOXA13_01 | CDP:HOXA13 | 170 (+) | 0.823 | 0.754 | aTGGATgaagctggcaa        |
| V\$PBX_Q3        | Pbx        | 184 (-) | 0.868 | 0.917 | caacatCATTC              |
| V\$CMAF_01       | c-Maf      | 188 (-) | 1     | 0.943 | catcattctCAGCAaacta      |
| V\$CMAF_04       | c-MAF      | 189 (-) | 1     | 0.935 | atcattcTCAGCaaact        |
| V\$CMAF_Q5       | c-MAF      | 191 (+) | 1     | 0.993 | cattcTCAGCa              |
| V\$MAFB_Q4_01    | MAFB       | 195 (+) | 1     | 1     | cTCAGCa                  |
| P\$C1_Q2         | C1         | 200 (+) | 1     | 0.983 | caAACTAtccc              |
| V\$PRDM16_06     | Prdm16     | 207 (+) | 1     | 0.977 | tCCCAGggac               |
| V\$MYOGNF1_01    | myogenin   | 210 (-) | 0.929 | 0.717 | cagggacaaaatACCAAGcaccac |
| V\$SOX17_Q2      | Sox-17     | 213 (-) | 1     | 1     | gGACAA                   |
| V\$ARID5A_04     | ARID5A     | 214 (+) | 0.889 | 0.879 | gacaaaATACCaagcac        |
| V\$TEF3_Q3       | TEF-3      | 216 (-) | 1     | 0.92  | caAAATAcc                |
| V\$AR_02         | AR         | 220 (+) | 1     | 0.913 | ataccaagcaccacaTGTTTcac  |

|             |       |         |       |       |                         |
|-------------|-------|---------|-------|-------|-------------------------|
| V\$PR_01    | PR    | 220 (+) | 1     | 0.951 | ataccaagcaccacaTGTTcact |
| V\$GR_01    | GR    | 220 (+) | 1     | 0.969 | ataccaagcaccacaTGTTcact |
| V\$AR_03    | AR    | 220 (+) | 1     | 0.957 | ataccaagcaccacaTGTTcact |
| V\$PR_02    | PR    | 220 (+) | 1     | 0.967 | ataccaagcaccacaTGTTcact |
| V\$NR3C1_01 | NR3C1 | 224 (-) | 0.875 | 0.865 | caaGCACCacatgttctc      |
| V\$AR_08    | AR    | 225 (-) | 0.806 | 0.848 | aaGCACCacatgttctc       |
| V\$AR_09    | AR    | 225 (-) | 0.804 | 0.853 | aaGCACCacatgttctc       |
| V\$NR3C1_03 | NR3C1 | 225 (-) | 0.764 | 0.852 | aaGCACCacatgttctc       |
| V\$PR_03    | PR    | 225 (-) | 0.782 | 0.879 | aaGCACCacatgttct        |
| V\$AR_08    | AR    | 225 (+) | 0.998 | 0.867 | aagcaccacaTGTTcctc      |
| V\$AR_09    | AR    | 225 (+) | 0.981 | 0.897 | aagcaccacaTGTTcctc      |
| V\$NR3C1_03 | NR3C1 | 225 (+) | 1     | 0.883 | aagcaccacaTGTTcctc      |
| V\$AR_Q2    | AR    | 226 (-) | 0.899 | 0.878 | AGCACcacatgttct         |
| V\$AR_01    | AR    | 226 (-) | 0.869 | 0.887 | aGCACCacatgttct         |
| V\$AR_13    | AR    | 226 (-) | 0.683 | 0.861 | aGCACCacatgttct         |
| V\$GR_02    | GR    | 226 (-) | 0.873 | 0.914 | aGCACCacatgttct         |
| V\$NR3C1_10 | GR    | 226 (+) | 0.869 | 0.877 | aGCACCacatgttct         |
| V\$GR_03    | GR    | 226 (+) | 0.843 | 0.9   | aGCACCacatgttct         |
| V\$AR_01    | AR    | 226 (+) | 1     | 0.904 | agcaccacaTGTTcct        |
| V\$AR_04    | AR    | 226 (+) | 1     | 0.913 | agcaccacaTGTTcct        |
| V\$NR3C1_04 | GR    | 226 (+) | 1     | 0.91  | agcaccacaTGTTc          |
| V\$AR_13    | AR    | 226 (+) | 1     | 0.859 | agcaccacaTGTTcct        |
| V\$GR_02    | GR    | 226 (+) | 1     | 0.917 | agcaccacaTGTTcct        |
| V\$AR_14    | AR    | 226 (+) | 1     | 0.942 | agcaccacaTGTTccta       |
| V\$NR3C1_10 | GR    | 226 (-) | 1     | 0.903 | agcaccacaTGTTcct        |
| V\$GR_03    | GR    | 226 (-) | 1     | 0.866 | agcaccacaTGTTcct        |
| V\$PR_03    | PR    | 226 (+) | 1     | 0.882 | agcaccacaTGTTcctc       |
| V\$AR_16    | AR    | 226 (+) | 1     | 0.885 | agcaccacaTGTTcctc       |
| V\$GRE_C    | GR    | 226 (+) | 1     | 0.904 | agcaccacatGTTCTc        |
| V\$AR_Q2    | AR    | 226 (+) | 1     | 0.905 | agcaccacatGTTCT         |
| V\$NR3C1_04 | GR    | 227 (-) | 0.774 | 0.86  | GCACCacatgttct          |
| V\$AR_Q6_01 | AR    | 227 (+) | 1     | 0.985 | gcaccacaTGTTcctc        |
| V\$AR_10    | AR    | 227 (-) | 1     | 0.936 | gcaccacaTGTTcctc        |



|                 |             |         |       |       |                      |
|-----------------|-------------|---------|-------|-------|----------------------|
| V\$AML1_01      | AML1a       | 229 (-) | 1     | 1     | ACCACa               |
| V\$AML1_Q6      | AML1        | 229 (-) | 1     | 1     | aCCACA               |
| V\$AML1_Q5      | AML1        | 229 (-) | 1     | 1     | aCCACA               |
| I\$SN_02        | Sn          | 229 (+) | 0.953 | 0.958 | accacATGTTctca       |
| V\$GR_Q6_02     | GR          | 230 (+) | 1     | 0.995 | ccacaTGTTctca        |
| F\$HSF_01       | HSF         | 236 (-) | 1     | 1     | GTTCT                |
| V\$PAX8_B       | Pax-8       | 236 (-) | 0.919 | 0.881 | gttctCACTCacagggtga  |
| V\$BRACH_03     | Brachyury   | 239 (+) | 0.938 | 0.898 | ctcactcacaggTGAGAatt |
| V\$CLOCK_02     | CLOCK       | 243 (+) | 0.932 | 0.926 | ctcacAGGTGagaa       |
| V\$ZBTB44_01    | Zbtb44      | 244 (-) | 1     | 1     | tCACAG               |
| V\$AREB6_01     | AREB6       | 244 (-) | 1     | 0.963 | tcaCAGGTgagaa        |
| V\$AREB6_02     | AREB6       | 244 (-) | 1     | 0.993 | tcacAGGTGaga         |
| V\$GATAD2A_01   | GATAD2A     | 245 (-) | 1     | 1     | CACAGg               |
| V\$ZEB_01       | ZEB         | 246 (-) | 1     | 1     | aCAGGTga             |
| V\$TEAD4TCF3_01 | TEF-3:E2A   | 246 (+) | 1     | 0.963 | acAGGTGagaattga      |
| V\$TBET_04      | T-bet       | 246 (+) | 0.978 | 0.964 | acagGTGAGaat         |
| V\$ZEB1_03      | ZEB1        | 247 (+) | 1     | 1     | CAGGTga              |
| V\$PAX4_Q2      | Pax-4       | 248 (-) | 0.974 | 0.895 | aGGTGAgatt           |
| V\$MEIS1SOX2_01 | meis1:Sox-2 | 251 (+) | 0.765 | 0.82  | TGAGAattgaacaatga    |
| V\$SOX21_04     | Sox-21      | 254 (-) | 1     | 0.971 | gaattgaACAATgagaa    |
| V\$SRY_05       | SRY         | 254 (+) | 1     | 0.98  | gaattgaACAATgagaa    |
| V\$SOX9_B1      | Sox-9       | 256 (+) | 1     | 0.967 | attgaACAATgaga       |
| V\$SOX30_03     | Sox-30      | 256 (+) | 1     | 0.983 | attgaACAATgagaac     |
| V\$SOX17_09     | Sox-17      | 256 (+) | 1     | 0.953 | attgaACAAT           |
| V\$SOX_Q6       | SOX         | 256 (-) | 0.901 | 0.877 | attgaaCAATGag        |
| V\$HBP1_04      | HBP1        | 256 (-) | 0.913 | 0.928 | attgaacAATGAgaca     |
| I\$CT_01        | ct          | 257 (+) | 1     | 1     | tTGAAC               |
| I\$SOXN_01      | SoxN        | 257 (+) | 1     | 0.94  | ttgaACAATga          |
| V\$VDR_01       | VDR         | 258 (-) | 1     | 0.818 | TGAACaatgagaacac     |
| V\$SOX6_01      | Sox-6       | 258 (-) | 1     | 0.964 | tgaACAATga           |
| V\$SOX17_Q2     | Sox-17      | 259 (-) | 1     | 1     | gAACAA               |
| F\$ROX1_Q6      | ROX1        | 260 (-) | 1     | 0.981 | aACAATgag            |
| V\$SOX10_Q6_01  | Sox-10      | 260 (+) | 1     | 1     | aACAATg              |

|                 |              |         |       |       |                          |
|-----------------|--------------|---------|-------|-------|--------------------------|
| V\$SRY_12       | SRY          | 260 (+) | 1     | 0.994 | aACAATga                 |
| V\$PR_01        | PR           | 261 (-) | 1     | 0.921 | acaatgaGAACAcatggacacagg |
| V\$PR_02        | PR           | 261 (-) | 1     | 0.91  | acaatgaGAACAcatggacacagg |
| V\$GR_Q6        | GR           | 265 (-) | 1     | 0.983 | tgaGAACAcatggacacag      |
| V\$GR_Q6_02     | GR           | 265 (-) | 1     | 0.996 | tgaGAACAcatgg            |
| F\$HSF_01       | HSF          | 267 (+) | 1     | 1     | AGAAC                    |
| N\$LIN14_01     | lin-14       | 268 (+) | 1     | 1     | GAACAc                   |
| V\$MYC_07       | c-Myc        | 268 (-) | 0.941 | 0.935 | gaaCACGTgga              |
| V\$FOXO1ELK3_02 | FOXO1A:Net   | 276 (+) | 0.796 | 0.84  | ggaCACAGgaagag           |
| V\$ERFFOXO1_01  | ERF:FOXO1A   | 276 (+) | 1     | 0.902 | ggacACAGGaagag           |
| V\$FOXO1ETV7_01 | FOXO1A:ETV7  | 276 (+) | 1     | 0.771 | ggacACAGGaagaggaacctc    |
| V\$ELK1EOMES_03 | Elk-1:TBR2   | 276 (+) | 0.845 | 0.855 | ggacaCAGGAaga            |
| V\$ELK1TBX21_02 | Elk-1:T-bet  | 276 (+) | 0.874 | 0.879 | ggacaCAGGAagag           |
| V\$FOXO1ELK1_02 | FOXO1A:Elk-1 | 276 (+) | 1     | 0.881 | ggacaCAGGAagag           |
| V\$ERFFOXI1_02  | ERF:FOXI1    | 276 (+) | 1     | 0.944 | ggacacAGGAagag           |
| V\$FOXJ2ELF1_01 | FOXJ2:Elf-1  | 276 (+) | 1     | 0.935 | ggacacAGGAagag           |
| V\$ETS1_09      | Ets1         | 277 (-) | 1     | 0.969 | gacacAGGAagagga          |
| V\$ETS1_11      | c-Ets-1      | 277 (+) | 1     | 0.96  | gacacaGGAAGagg           |
| V\$FLI1_10      | Fli-1        | 277 (+) | 1     | 0.952 | gacacaGGAAGagg           |
| V\$ERG_08       | Erg          | 278 (+) | 1     | 0.986 | acacAGGAAGagg            |
| V\$ERG_09       | Erg          | 278 (+) | 1     | 0.99  | acacAGGAAGagga           |
| V\$ETS1_10      | c-Ets-1      | 278 (+) | 1     | 0.956 | acacaGGAAGagg            |
| V\$GATAD2A_01   | GATAD2A      | 279 (-) | 1     | 1     | CACAGg                   |
| V\$PEA3_03      | PEA3         | 279 (+) | 1     | 0.996 | cacAGGAAGag              |
| V\$ETS2_Q4      | c-Ets-2      | 279 (-) | 1     | 0.993 | cacaGGAAGag              |
| V\$ETS2_03      | c-Ets-2      | 279 (+) | 1     | 0.993 | cacaGGAAGagga            |
| V\$ETS2_04      | c-Ets-2      | 279 (+) | 1     | 0.993 | cacaGGAAGagga            |
| V\$ER71_Q2      | ER71         | 280 (-) | 1     | 1     | aCAGGAag                 |
| V\$ELK1_11      | Elk-1        | 280 (+) | 0.912 | 0.874 | acAGGAAGagg              |
| V\$GABP_B       | GABP         | 280 (+) | 1     | 0.934 | acaGGAAGagga             |
| V\$SAP1A_Q6     | SAP-1a       | 280 (-) | 1     | 1     | acaGGAAG                 |
| V\$FLI1_05      | Fli-1        | 280 (+) | 1     | 0.967 | acaGGAAGagg              |
| V\$GABPBETA_01  | GABPBETA     | 280 (-) | 1     | 0.986 | acaGGAAGagg              |

|                 |             |         |       |       |                        |
|-----------------|-------------|---------|-------|-------|------------------------|
| V\$PET1_03      | Pet-1       | 280 (+) | 1     | 0.968 | acaGGAAGag             |
| V\$PET1_04      | Pet-1       | 280 (+) | 1     | 0.968 | acaGGAAGag             |
| V\$ELK1_Q4      | Elk-1       | 281 (-) | 1     | 1     | cAGGAAG                |
| V\$ETS2_Q6      | c-Ets-2     | 281 (-) | 1     | 1     | caGGAAG                |
| V\$ELF1_Q5      | Elf-1       | 282 (+) | 1     | 1     | AGGAAG                 |
| V\$SPI1_Q5      | PU.1        | 282 (+) | 1     | 1     | AGGAAG                 |
| V\$DREF_02      | DREF        | 282 (-) | 0.997 | 0.967 | aggAAGAGgaac           |
| V\$ZNF35_04     | ZNF35       | 283 (+) | 1     | 1     | gGAAGA                 |
| V\$SPIB_Q3      | Spi-B       | 287 (-) | 1     | 1     | gAGGAA                 |
| V\$MUSCLEINI_B  | Muscle      | 289 (+) | 0.974 | 0.915 | ggaacctcaCACACcggggcc  |
| V\$RUNX2_02     | RUNX2       | 290 (+) | 0.875 | 0.787 | gaACCTCacacaccgggg     |
| V\$P53_01       | p53         | 295 (+) | 0.57  | 0.686 | tcACACAccggggcctgtca   |
| V\$E2F3FOXO6_01 | E2F-3:FOXO6 | 301 (-) | 0.796 | 0.749 | accggggCCTGTcatgg      |
| P\$HSF3_01      | HSF3        | 302 (+) | 1     | 1     | cCGGGG                 |
| V\$CPBP_Q6      | CPBP        | 302 (-) | 1     | 1     | ccGGGGC                |
| V\$PLAG1_02     | PLAG1       | 304 (-) | 0.924 | 0.941 | ggggcctgtcaTGGGG       |
| I\$ACHI_01      | achi        | 309 (-) | 1     | 1     | cTGTCa                 |
| I\$Hth_01       | hth         | 309 (-) | 1     | 1     | cTGTCa                 |
| I\$VIS_01       | vis         | 309 (-) | 1     | 1     | cTGTCa                 |
| I\$ACHI_02      | achi        | 309 (-) | 1     | 1     | cTGTCa                 |
| I\$VIS_02       | vis         | 309 (-) | 1     | 1     | cTGTCa                 |
| V\$ETF_Q6_01    | ETF         | 314 (-) | 0.965 | 0.954 | atggGGTGGgg            |
| V\$GKLF_Q3_01   | GKLF        | 314 (+) | 0.992 | 0.988 | atgggggtGGGGGg         |
| F\$ADR1_01      | Adr1p       | 315 (+) | 1     | 1     | tGGGGT                 |
| V\$SREBP1_Q6    | SREBP-1     | 315 (-) | 1     | 1     | tgGGGTG                |
| V\$MAZ_03       | MAZ         | 315 (+) | 0.943 | 0.881 | tggGGTGGggggagggcgacgg |
| V\$ZNF692_02    | ZNF692      | 315 (-) | 1     | 0.917 | tgggGTGGGgggagg        |
| V\$PAX4_03      | Pax-4       | 316 (-) | 1     | 0.985 | gGGGTGggggga           |
| V\$SP1_02       | SP1         | 316 (+) | 0.989 | 0.993 | gGGGTGggggg            |
| V\$LKLF_Q3      | LKLF        | 316 (+) | 1     | 1     | gGGGTGgggg             |
| V\$LKLF_Q6      | LKLF        | 316 (-) | 1     | 1     | gGGGTGggg              |
| V\$DB1_02       | DB1         | 316 (+) | 1     | 0.907 | ggggtggggGGAGGgcgacggg |
| V\$SALL2_01     | SALL2       | 317 (+) | 1     | 1     | GGGTGgg                |

|                   |              |         |       |       |                        |
|-------------------|--------------|---------|-------|-------|------------------------|
| V\$KLF_Q3         | KLF          | 317 (+) | 1     | 1     | GGGTGggg               |
| V\$MAZ_02         | MAZ          | 317 (+) | 0.952 | 0.871 | gGGTGgggggagggcgacggga |
| V\$KID3_01        | Kid3         | 318 (-) | 1     | 1     | GGTGG                  |
| F\$HMO1CA_01      | HMO1         | 318 (-) | 0.989 | 0.962 | ggtGGGGGgag            |
| V\$CPBP_Q6        | CPBP         | 319 (-) | 1     | 1     | gtGGGGG                |
| V\$ZFP740_05      | Zfp740       | 319 (-) | 1     | 0.923 | gtgGGGGGgag            |
| P\$ANAC042_01     | ANAC042      | 319 (-) | 0.925 | 0.8   | gtgggggggagggcgACGGGa  |
| V\$ETF_Q6_01      | ETF          | 321 (-) | 0.965 | 0.917 | ggggGAGGgc             |
| V\$WT1_Q6         | WT1          | 322 (-) | 1     | 1     | gggGGAGGg              |
| V\$REST_13        | REST         | 322 (-) | 0.797 | 0.741 | gggggAGGGCgacggga      |
| V\$MAZ_Q6         | MAZ          | 323 (+) | 1     | 1     | gGGGAGgg               |
| V\$FKLF_Q5        | FKLF         | 323 (+) | 0.984 | 0.988 | gGGGAGggcg             |
| V\$CKROX_Q2       | CKROX        | 323 (-) | 1     | 1     | gggGAGGGc              |
| P\$RRTF1_02       | RRTF1        | 328 (-) | 0.866 | 0.824 | gggCGACGgg             |
| P\$RAP26_03       | RAP2-6       | 328 (-) | 0.844 | 0.83  | gggCGACGgg             |
| P\$RAP210_04      | RAP2-10      | 328 (-) | 0.814 | 0.794 | gggCGACGgg             |
| I\$MAD_Q6         | MAD          | 330 (+) | 1     | 1     | gCGACGgg               |
| P\$HSFA1E_01      | HSFA1E       | 331 (-) | 0.996 | 0.997 | CGACGg                 |
| I\$ARA_01         | ara          | 339 (+) | 1     | 1     | TAACA                  |
| I\$CAUP_01        | caup         | 339 (+) | 1     | 1     | TAACA                  |
| F\$YDR520C_01     | Ydr520c      | 340 (+) | 0.786 | 0.84  | aacattAGGAGatacaccta   |
| V\$OCT1_Q6        | 1-Oct        | 356 (+) | 0.909 | 0.926 | cctaataGTAATgac        |
| V\$POU2F2_08      | 2-Oct        | 358 (-) | 0.881 | 0.906 | taATGTAaatgac          |
| V\$OCT_Q6         | Octamer      | 359 (-) | 0.963 | 0.966 | aATGTAaatga            |
| V\$OCT1_Q5_01     | 1-Oct        | 359 (-) | 0.986 | 0.988 | aatGTAATga             |
| V\$MEIS1BHOXA9_02 | MEIS1B:HOXA9 | 367 (+) | 1     | 0.948 | TGACAagttaatgc         |
| V\$MEIS1DLX2_01   | meis1:Dlx-2  | 367 (+) | 1     | 0.976 | TGACAagttaatgc         |
| V\$HNF1B_Q6_01    | HNF-1beta    | 372 (-) | 1     | 0.91  | aGTTAAtgcgtaca         |
| V\$IPF1_Q6        | ipf1         | 374 (-) | 1     | 1     | tTAATG                 |
| P\$SPL15_01       | SPL15        | 376 (-) | 1     | 0.848 | aatgCGTACagcac         |
| P\$SPL4_01        | SPL4         | 377 (-) | 1     | 0.988 | atgCGTACa              |
| P\$SPL5_02        | SPL5         | 377 (-) | 1     | 0.847 | atgCGTACagca           |
| P\$BHLH28_01      | bHLH28       | 377 (-) | 1     | 0.864 | atgCGTACagca           |

|                 |                 |         |       |       |                          |
|-----------------|-----------------|---------|-------|-------|--------------------------|
| P\$SPL3_01      | SPL3            | 378 (+) | 0.8   | 0.839 | tGCGTAcA                 |
| P\$SPL1_01      | SPL1            | 378 (+) | 1     | 0.787 | tgCGTACagc               |
| P\$SPL12_01     | SPL12           | 378 (-) | 1     | 0.971 | tgCGTACa                 |
| P\$SPL5_01      | SPL5            | 378 (-) | 1     | 0.963 | tgCGTACag                |
| P\$SPL1_01      | SPL1            | 378 (-) | 0.847 | 0.805 | tcGTACAgc                |
| V\$THAP1_01     | Thap1           | 379 (-) | 1     | 0.746 | gcgtacagcacaccaacATGGCac |
| V\$YY1_07       | YY1             | 382 (-) | 1     | 0.868 | tacagcacaccaacATGGCaca   |
| P\$CBF3_02      | CBF3            | 386 (+) | 0.796 | 0.806 | gcacaCCAACatgg           |
| P\$AT1G77200_03 | AT1G77200       | 388 (+) | 0.797 | 0.821 | acaCCAACatggca           |
| V\$YY1_Q6       | YY1             | 392 (-) | 1     | 0.997 | caacATGGC                |
| V\$YY1_03       | YY1             | 392 (-) | 1     | 0.889 | caacATGGCaca             |
| V\$YY1_12       | YY1             | 392 (+) | 1     | 0.95  | caacATGGCaca             |
| V\$YY1_14       | YY1             | 392 (+) | 1     | 0.893 | caacATGGCaca             |
| P\$MYB118_01    | MYB118          | 412 (-) | 1     | 0.817 | tatGTAACaaacctgca        |
| I\$ARA_01       | ara             | 416 (+) | 1     | 1     | TAACA                    |
| I\$CAUP_01      | caup            | 416 (+) | 1     | 1     | TAACA                    |
| P\$ATMYB15_Q2   | Myb-15          | 416 (+) | 1     | 1     | TAACAA                   |
| V\$SOX4_Q5      | Sox-4           | 417 (+) | 1     | 1     | AACAAa                   |
| P\$MYB3R5_01    | MYB3R5          | 419 (+) | 0.827 | 0.798 | caaacctgcACGTTg          |
| P\$MYB3R1_01    | MYB3R1          | 420 (+) | 0.858 | 0.813 | aaacctgcACGTTgt          |
| P\$MYB3R4_01    | MYB3R4          | 420 (+) | 0.839 | 0.81  | aaacctgcACGTTgt          |
| V\$SOX10_09     | Sox-10          | 420 (+) | 0.941 | 0.887 | aaacctgcacGTTGTg         |
| V\$GABPA_08     | GABP-alpha      | 421 (+) | 0.865 | 0.858 | AACCTgcac                |
| V\$HIF1A_Q6     | HIF-1alpha      | 426 (+) | 1     | 1     | gCACGT                   |
| V\$TRP53_02     | Trp53           | 426 (+) | 0.954 | 0.844 | gCACGTtgtggtcatgt        |
| V\$HIF1A_Q4     | HIF-1alpha      | 426 (-) | 1     | 0.981 | gCACGTtg                 |
| P\$OCSBF1_01    | OCSBF-1         | 427 (+) | 1     | 1     | CACGT                    |
| P\$HMG1_01      | HMG-1           | 430 (+) | 1     | 0.963 | GTTGTggtc                |
| V\$AML1_Q6      | AML1            | 432 (+) | 1     | 1     | TGTGGt                   |
| V\$AML1_Q5      | AML1            | 432 (+) | 1     | 1     | TGTGGt                   |
| V\$PEBP2B_Q6    | PEBP2beta       | 432 (+) | 1     | 1     | TGTGGtc                  |
| V\$AML1_01      | AML1a           | 432 (+) | 1     | 1     | tGTGGT                   |
| V\$NR4A2RXRA_01 | NURR1:RXR-ALPHA | 433 (-) | 1     | 0.821 | gtGGTCAtgtaccct          |

|                 |           |         |       |       |                         |
|-----------------|-----------|---------|-------|-------|-------------------------|
| V\$RXRA_06      | RXRA      | 433 (+) | 0.675 | 0.831 | gtggtcaTGTA Ccc         |
| V\$PRDM16_01    | PRDM16    | 434 (-) | 0.632 | 0.817 | tggtcaTGTA Cc           |
| P\$SRS7_01      | SRS7      | 441 (+) | 1     | 0.714 | gtACCCTagaacttaaagtttaa |
| P\$MYB1L_01     | MYB1-like | 442 (+) | 1     | 1     | taCCCTAga               |
| F\$HSF_01       | HSF       | 448 (+) | 1     | 1     | AGAAC                   |
| V\$LHX3_Q3      | LHX3      | 459 (-) | 1     | 1     | tTTAAT                  |
| V\$HOXD13_Q6    | HOXD13    | 459 (+) | 0.987 | 0.97  | ttaATAATag              |
| V\$PMX1_Q6      | PMX1      | 461 (+) | 1     | 1     | TAATAa                  |
| V\$ZNF333_01    | ZNF333    | 463 (+) | 1     | 1     | ATAAT                   |
| V\$FREAC3_01    | Freac-3   | 464 (+) | 1     | 0.901 | taataGTAA Aaaaaaa       |
| V\$FOXA2_04     | HNF3-beta | 464 (+) | 1     | 0.922 | taataGTAA Aaaaaaa       |
| V\$FOXA2_05     | FOXA2     | 464 (+) | 1     | 0.924 | taataGTAA Aaaaaaa       |
| P\$HSFA4A_01    | HSFA4A    | 465 (-) | 1     | 1     | AATAGt                  |
| P\$GT1_Q6_01    | GT-1      | 468 (-) | 1     | 0.991 | agtaaaaAAAAA            |
| V\$FOXJ3_07     | FOXJ3     | 469 (+) | 0.968 | 0.975 | gtAAAAAa                |
| P\$MADSA_Q2     | MADS-A    | 471 (+) | 0.8   | 0.872 | aaaaaaAAAAAggaaa        |
| P\$AP1_01       | AP1       | 474 (+) | 1     | 0.956 | aaAAAAAaggaaa           |
| V\$STAT1_11     | STAT1     | 474 (-) | 0.908 | 0.904 | aaaaaaaaGAAA Aaaaag     |
| I\$DATI_01      | dati      | 475 (+) | 1     | 0.993 | aAAAAAaggaaaaaaa        |
| V\$IRF4_Q5_01   | IRF4      | 475 (+) | 1     | 0.999 | aaaaaaAGGAAa            |
| V\$STAT1_11     | STAT1     | 475 (-) | 0.955 | 0.912 | aaaaaaagGAAA Aaaaaga    |
| P\$PBF_Q2       | PBF       | 478 (+) | 1     | 1     | aAAAGG                  |
| P\$PBF_Q2_01    | PBF       | 478 (-) | 1     | 1     | aAAAGG                  |
| V\$PRDM6_02     | PRDM6     | 478 (+) | 1     | 0.999 | aaaagGAAA Aaaa          |
| V\$NFAT1_Q6     | NFATc2    | 482 (+) | 1     | 1     | GGAAAa                  |
| V\$NFAT4_Q3     | NFATc3    | 482 (+) | 1     | 1     | GGAAAa                  |
| V\$NFAT1_Q4     | NFATc2    | 482 (+) | 1     | 1     | GGAAAa                  |
| P\$AT3G51080_01 | AT3G51080 | 482 (+) | 1     | 1     | GGAAAa                  |
| P\$PBF_01       | PBF       | 485 (+) | 1     | 0.995 | aaaAAAAGaga             |
| V\$STAT1_11     | STAT1     | 486 (-) | 0.955 | 0.918 | aaaaaagaGAAA Atgacat    |
| V\$BCL11A_04    | BCL-11A   | 488 (+) | 0.871 | 0.892 | aaaagAGAAA atgacat      |
| N\$BLMP1_01     | blmp-1    | 488 (+) | 1     | 0.999 | aaaagaGAAA              |
| V\$IRF4_11      | IRF-4     | 488 (+) | 0.98  | 0.873 | aaaagagaAAATGacatc      |

|                   |              |         |       |       |                      |
|-------------------|--------------|---------|-------|-------|----------------------|
| V\$IRF2_03        | IRF-2        | 489 (+) | 0.984 | 0.959 | aaagaGAAAAtg         |
| P\$TGA2_04        | TGA2         | 489 (-) | 0.816 | 0.849 | aaagagaaaatgaCATCAga |
| V\$IRF7_Q3        | IRF-7        | 490 (+) | 1     | 1     | AAGAGaa              |
| P\$TGA7_02        | TGA7         | 493 (-) | 0.826 | 0.864 | agaaaatGACATcagac    |
| V\$FOS_09         | C-FOS        | 494 (+) | 0.877 | 0.895 | gaaaaTGACATcagact    |
| P\$TGA6_02        | TGA6         | 494 (-) | 0.821 | 0.843 | gaaaatgaCATCAga      |
| V\$ATF1_03        | Atf-1        | 495 (+) | 0.797 | 0.849 | aaaatGACATcagact     |
| V\$ATF1_03        | Atf-1        | 495 (-) | 0.797 | 0.848 | aaaatgACATCagact     |
| P\$TGA5_02        | TGA5         | 495 (-) | 0.815 | 0.839 | aaaatgaCATCAga       |
| V\$ATF3_Q6        | ATF3         | 496 (+) | 0.881 | 0.864 | aaaTGACATcagac       |
| P\$TGA7_02        | TGA7         | 496 (+) | 0.816 | 0.847 | aatgACATCagactca     |
| V\$ATF3_Q6        | ATF3         | 496 (-) | 0.877 | 0.87  | aatgaCATCAgac        |
| V\$NFE2L1_Q5      | Nfe2l1       | 497 (-) | 1     | 0.953 | aATGACatcaga         |
| V\$JUNFRA2_02     | C-JUN:FRA-2  | 497 (+) | 0.874 | 0.901 | aaTGACAtcag          |
| P\$TGA2_04        | TGA2         | 497 (+) | 0.82  | 0.852 | aaTGACATcagactcatatg |
| P\$TGA5_02        | TGA5         | 497 (+) | 0.821 | 0.841 | aaTGACATcagact       |
| P\$TGA6_02        | TGA6         | 497 (+) | 0.824 | 0.843 | aaTGACATcagactc      |
| V\$CREB1_04       | CREB1        | 497 (+) | 0.881 | 0.928 | aatGACATcaga         |
| V\$CREB1_04       | CREB1        | 497 (-) | 0.881 | 0.928 | aatgACATCaga         |
| V\$JUNDFRA1_02    | JUND:FRA-1   | 498 (+) | 0.925 | 0.905 | aTGACAtcag           |
| V\$MEQCJUN_02     | MEQ:c-Jun    | 498 (-) | 0.867 | 0.867 | atGACATcaga          |
| V\$JUND_01        | JunD         | 498 (+) | 0.868 | 0.922 | atgaCATCA            |
| V\$ATF2_02        | ATF-2        | 498 (-) | 1     | 0.978 | atgaCATCAga          |
| V\$ATF2_03        | ATF-2        | 498 (-) | 1     | 0.978 | atgaCATCAga          |
| V\$CREBP1CJUN_01  | ATF2:c-Jun   | 499 (+) | 0.848 | 0.891 | tGACATca             |
| V\$NEUROD_01      | NeuroD-2     | 509 (-) | 1     | 0.954 | ctcATATGtc           |
| V\$SPIB_Q3        | Spi-B        | 524 (-) | 1     | 1     | gGAGAA               |
| V\$LEF1_04        | LEF-1        | 524 (-) | 1     | 0.912 | ggagaaTCAAAGtatta    |
| I\$TCF_Q6         | TCF          | 525 (+) | 1     | 0.986 | gagaaTCAAAGtatta     |
| V\$LEF1_Q4        | LEF-1        | 525 (+) | 1     | 0.996 | gagaatCAAAGta        |
| V\$TCF7RELATED_Q4 | TCF7RELATED  | 525 (+) | 1     | 0.997 | gagaatCAAAGt         |
| V\$BETACATENIN_Q6 | Beta-catenin | 526 (-) | 1     | 0.977 | agaatCAAAGtatta      |
| V\$LEF1_Q3        | LEF-1        | 526 (+) | 1     | 0.999 | agaatCAAAGt          |

|                      |               |         |       |       |                  |
|----------------------|---------------|---------|-------|-------|------------------|
| V\$TCF4_Q5_02        | TCF-4         | 527 (+) | 1     | 0.998 | gaatCAAAGt       |
| V\$TCF3_Q6_01        | TCF3          | 527 (+) | 1     | 0.979 | gaatCAAAGt       |
| V\$LEF1_Q2_01        | LEF-1         | 528 (+) | 1     | 0.989 | aatCAAAGta       |
| V\$BETACATENIN_Q3_01 | beta-catenin  | 528 (-) | 1     | 0.999 | aatCAAAG         |
| V\$BETACATENIN_Q6_01 | beta-catenin  | 528 (-) | 1     | 1     | aatCAAAG         |
| V\$LEF1_07           | LEF-1         | 529 (-) | 1     | 0.995 | aTCAAAGtat       |
| V\$LEF1_Q2           | TCF-7         | 530 (+) | 1     | 1     | tCAAAG           |
| V\$TCF3_Q6           | TCF-3         | 530 (-) | 1     | 1     | tCAAAG           |
| V\$AP2GAMMA_Q5       | AP-2          | 541 (-) | 1     | 1     | CAGGCaa          |
| F\$MOT3_01           | MOT3          | 541 (+) | 1     | 1     | cAGGCA           |
| P\$EDT1_01           | EDT1          | 549 (-) | 0.965 | 0.962 | gcATTTAata       |
| V\$LHX3_Q3           | LHX3          | 552 (-) | 1     | 1     | tTTAAT           |
| V\$SALL3_Q3          | Sall3         | 562 (-) | 0.981 | 0.969 | tccctgGTACct     |
| I\$SD_01             | sd            | 578 (+) | 1     | 0.953 | gaCATTcattaa     |
| V\$SOX8_Q4           | Sox-8         | 579 (+) | 1     | 0.973 | acATTCattaaatg   |
| V\$IPF1_Q5           | ipf1          | 581 (+) | 1     | 0.979 | attcATTAAatg     |
| I\$DFD_02            | Dfd           | 583 (-) | 1     | 1     | tCATTaa          |
| I\$SCR_01            | Scr           | 583 (-) | 1     | 1     | tCATTaa          |
| I\$BTN_01            | btn           | 583 (-) | 1     | 1     | tCATTaa          |
| I\$EMS_01            | ems           | 583 (-) | 1     | 1     | tCATTaa          |
| I\$ANTP_01           | Antp          | 583 (-) | 1     | 1     | tcATTAA          |
| I\$FTZ_02            | ftz           | 583 (-) | 1     | 1     | tcATTAA          |
| P\$EDT1_01           | EDT1          | 583 (-) | 1     | 0.978 | tcATTAAatg       |
| V\$IPF1_Q6           | ipf1          | 584 (+) | 1     | 1     | CATTaa           |
| V\$MSX1_Q1           | Msx-1         | 584 (+) | 0.996 | 0.958 | catTAAATg        |
| V\$LHX3_Q3           | LHX3          | 585 (+) | 1     | 1     | ATTAAa           |
| I\$ZEN_Q6            | Zen           | 586 (-) | 1     | 1     | ttaAATGT         |
| V\$FOXO1_Q6          | FOXO1         | 586 (+) | 0.858 | 0.79  | ttaaagtGTGTTtc   |
| V\$FOXO1HOXA10_Q1    | FOXO1A:HOXA10 | 586 (-) | 1     | 0.901 | ttaaagtTGTTTtc   |
| V\$ELK1EVX1_Q1       | Elk-1:EVX1    | 587 (-) | 1     | 0.816 | taaagtgtTTTCcttc |
| V\$MEQ_Q1            | MEQ           | 590 (-) | 1     | 0.976 | aTGTGTttt        |
| I\$MIRR_01           | mirr          | 593 (-) | 1     | 1     | TGTTT            |
| V\$FOXK1_Q11         | FOXK1         | 593 (+) | 1     | 0.986 | TGTTTtcctt       |



|                  |                  |         |       |       |                       |
|------------------|------------------|---------|-------|-------|-----------------------|
| V\$TEAD4CEBPB_01 | TEF-3:C/EBPbeta  | 594 (-) | 0.783 | 0.729 | gtttccttctctttcTGCAAc |
| V\$NFAT1_Q6      | NFATc2           | 595 (-) | 1     | 1     | tTTTCC                |
| V\$NFAT4_Q3      | NFATc3           | 595 (-) | 1     | 1     | tTTTCC                |
| V\$NFAT1_Q4      | NFATc2           | 595 (-) | 1     | 1     | tTTTCC                |
| V\$TAL1_01       | Tal-1            | 596 (+) | 0.996 | 0.97  | tttcTTCTCttt          |
| V\$IRF7_Q3       | IRF-7            | 601 (-) | 1     | 1     | ttCTCTT               |
| V\$MAFB_03       | MAFB             | 603 (-) | 0.953 | 0.942 | ctctTTCTGcaacac       |
| V\$CEBP_Q2       | C/EBP            | 604 (-) | 0.987 | 0.975 | tctttctGCAACac        |
| P\$BPC1_Q2       | BPC1             | 605 (-) | 1     | 1     | cTTTCT                |
| V\$CEBPA_05      | C/EBPalpha       | 605 (+) | 1     | 0.928 | cttcTGCAAcac          |
| V\$SPIB_Q3       | Spi-B            | 607 (+) | 1     | 1     | TTCTGc                |
| V\$MEQ_01        | MEQ              | 613 (+) | 1     | 0.995 | aacACACAa             |
| F\$MIG1_03       | Mig1p            | 616 (+) | 0.853 | 0.813 | acacaaatGCGGTgtg      |
| I\$TWI_03        | Twi              | 623 (-) | 0.846 | 0.905 | tgCGGTGgttg           |
| V\$FAC1_01       | FAC1             | 626 (-) | 1     | 0.961 | ggtgtGTTGTggga        |
| V\$FOXJ1_04      | FOXJ1            | 626 (-) | 1     | 0.94  | ggtgtGTTGTgggac       |
| V\$CEBPGELF1_01  | C/EBPgamma:Elf-1 | 632 (+) | 0.846 | 0.768 | ttgtgggacacaGGAAct    |
| P\$TCP7_01       | TCP7             | 634 (+) | 1     | 0.853 | GTGGGacacag           |
| V\$ERFFOXI1_02   | ERF:FOXI1        | 637 (+) | 1     | 0.932 | ggacacAGGAAActa       |
| V\$CETS1P54_02   | c-Ets-1(p54)     | 639 (+) | 0.993 | 0.983 | acacAGGAAActaa        |
| V\$GATAD2A_01    | GATAD2A          | 640 (-) | 1     | 1     | CACAGg                |
| V\$ETS_B         | c-Ets            | 640 (+) | 1     | 0.924 | cacAGGAAActaact       |
| F\$YBR239C_02    | Ybr239c          | 641 (+) | 0.8   | 0.813 | acAGGAAc              |
| V\$SPIB_02       | Spi-B            | 641 (+) | 0.986 | 0.975 | acaGGAACta            |
| V\$ERFSREBF2_02  | ERF:SREBP-2      | 641 (+) | 0.85  | 0.787 | acaggaactaACTTGac     |
| P\$WRKY18_Q2     | WRKY18           | 649 (-) | 1     | 1     | taacTTGAC             |
| V\$CDP_Q6_01     | CDP              | 650 (+) | 0.993 | 0.988 | aacttgaCAAATg         |
| I\$PRD_02        | Prd              | 651 (+) | 0.822 | 0.85  | acTTGACaaatg          |
| P\$SPL15_01      | SPL15            | 658 (+) | 0.795 | 0.81  | aaatgGTAAGgata        |
| P\$SPL5_02       | SPL5             | 659 (+) | 0.8   | 0.826 | aatgGTAAGgat          |
| P\$BHLH28_01     | bHLH28           | 659 (+) | 0.8   | 0.822 | aatgGTAAGgat          |
| P\$SPL3_01       | SPL3             | 662 (-) | 0.8   | 0.837 | ggTAAGGa              |
| V\$HOXA13_01     | HOXA13           | 669 (+) | 1     | 1     | ATAAAa                |

|                |          |         |       |       |                     |
|----------------|----------|---------|-------|-------|---------------------|
| V\$SATB1_Q5_01 | SATB1    | 669 (-) | 1     | 1     | ATAAAa              |
| V\$HOXD13_Q6   | HOXD13   | 670 (+) | 1     | 0.994 | taaaATAAAac         |
| V\$FOXL1_02    | FOXL1    | 671 (+) | 1     | 0.973 | aaaataaAACAAaaaa    |
| V\$HOXA13_02   | HOXA13   | 672 (+) | 1     | 1     | aaATAAAac           |
| V\$CDX1_Q5     | Cdx-1    | 673 (-) | 1     | 1     | aATAAA              |
| V\$FOXP3_Q6    | FOXP3    | 673 (+) | 1     | 0.994 | aataAAACAaaa        |
| V\$HOXA13_01   | HOXA13   | 674 (+) | 1     | 1     | ATAAAa              |
| V\$SATB1_Q5_01 | SATB1    | 674 (-) | 1     | 1     | ATAAAa              |
| V\$FOXC1_Q4    | Foxc1    | 674 (-) | 1     | 1     | ataaAACAA           |
| V\$SRY_01      | SRY      | 677 (+) | 1     | 1     | AAACAaa             |
| I\$MIRR_01     | mirr     | 677 (+) | 1     | 1     | AAACA               |
| V\$FOXO1A_Q5   | FOXO1A   | 677 (+) | 1     | 1     | AAACAa              |
| V\$SRY_Q6      | SRY      | 677 (-) | 1     | 1     | aAACAA              |
| V\$SOX4_Q5     | Sox-4    | 678 (+) | 1     | 1     | AACAAa              |
| P\$MYB3R1_01   | MYB3R1   | 685 (-) | 0.789 | 0.797 | aaAAAGGtaatattt     |
| P\$MYB3R4_01   | MYB3R4   | 685 (-) | 0.792 | 0.795 | aaAAAGGtaatattt     |
| P\$PBF_Q2      | PBF      | 686 (+) | 1     | 1     | aAAAGG              |
| P\$PBF_Q2_01   | PBF      | 686 (-) | 1     | 1     | aAAAGG              |
| P\$MYB3R5_01   | MYB3R5   | 686 (-) | 0.792 | 0.801 | aAAAGGtaatatttg     |
| V\$XVENT1_01   | Xvent-1  | 691 (+) | 1     | 0.946 | gtaatATTTGtgt       |
| P\$ATHSFA1D_01 | ATHSFA1D | 701 (-) | 1     | 1     | TGTAGt              |
| V\$HSF1_Q6_01  | HSF1     | 705 (+) | 1     | 0.979 | gtagtTTCTGgcag      |
| V\$HSF1_Q5     | HSF1     | 705 (-) | 1     | 0.962 | gtagtTTCTGgc        |
| V\$HSF1_Q5_01  | HSF1     | 705 (+) | 1     | 0.987 | gtagtTTCTGgc        |
| V\$NF1B_Q6_01  | NF-1B    | 708 (-) | 1     | 0.998 | gtttCTGGC           |
| V\$HSF4_Q3     | HSF4     | 712 (-) | 1     | 1     | ctGGCAG             |
| V\$SMAD1_Q6    | Smad1    | 719 (+) | 1     | 0.987 | agGCAGAcc           |
| I\$EVE_Q6      | Eve      | 721 (-) | 1     | 0.966 | GCAGAccaga          |
| V\$GATA5_Q4    | GATA-5   | 727 (-) | 1     | 1     | cAGATA              |
| F\$STP4_02     | Stp4p    | 729 (+) | 0.8   | 0.808 | gaTAGAGct           |
| V\$FOXM1_Q3    | FOXM1    | 738 (-) | 0.985 | 0.907 | aaaaCACTCta         |
| I\$MIRR_01     | mirr     | 739 (+) | 1     | 1     | AAACA               |
| V\$CMAF_03     | c-MAF    | 747 (+) | 1     | 0.952 | taagttGCTGAaaaagact |

|                  |              |         |       |       |                       |
|------------------|--------------|---------|-------|-------|-----------------------|
| V\$CMAF_04       | c-MAF        | 748 (+) | 1     | 0.937 | aagttGCTGAaaaagac     |
| V\$CMAF_Q5       | c-MAF        | 752 (-) | 1     | 0.961 | tGCTGAaaaag           |
| V\$MAFB_Q4_01    | MAFB         | 752 (-) | 1     | 1     | tGCTGAa               |
| V\$NKX22_01      | Nkx2-2       | 759 (-) | 1     | 0.958 | aaagACTTAa            |
| V\$HOXD12ELK1_01 | HOXD12:Elk-1 | 764 (-) | 0.79  | 0.764 | cttaaaaaCTTCTgta      |
| V\$ELK1HOXB13_01 | Elk-1:HOXB13 | 764 (-) | 0.777 | 0.768 | cttaaaaacTTCTGtt      |
| P\$MYB24_01      | MYB24        | 775 (+) | 1     | 0.966 | ctgTTAGGc             |
| I\$ARA_01        | ara          | 776 (-) | 1     | 1     | TGTTA                 |
| I\$CAUP_01       | caup         | 776 (-) | 1     | 1     | TGTTA                 |
| V\$REST_16       | REST         | 787 (-) | 0.914 | 0.812 | gggtaCTGGCctagctggtgt |
| V\$FOXJ1_04      | FOXJ1        | 798 (-) | 1     | 0.932 | tagctGTTGTaacta       |
| V\$RFX4_04       | RFX4         | 803 (-) | 1     | 0.995 | gttGTAACtaagaaa       |
| I\$LBE_01        | lbe          | 807 (+) | 1     | 1     | TAACTa                |
| F\$YML081W_01    | Yml081wp     | 811 (+) | 0.911 | 0.84  | taagaaagcCCCACatataat |
| V\$PARP_Q4       | PARP         | 812 (-) | 1     | 1     | aAGAAA                |
| P\$BPC1_Q2       | BPC1         | 813 (+) | 1     | 1     | AGAAAg                |
| V\$CPBP_Q6       | CPBP         | 818 (+) | 1     | 1     | GCCCCac               |
| V\$NANOG_Q3      | Nanog        | 825 (+) | 1     | 0.991 | ataTAATGgt            |
| V\$BARX1_05      | Barx1        | 826 (+) | 0.957 | 0.951 | tatAATGGtta           |
| V\$ZNF333_01     | ZNF333       | 827 (+) | 1     | 1     | ATAAT                 |
| V\$YY2           | YY2          | 827 (-) | 1     | 1     | atAATGG               |
| F\$ADR1_Q6       | Adr1p        | 843 (+) | 0.988 | 0.938 | atgGGAGTtt            |
| V\$RELA_05       | RelA-p65     | 845 (-) | 0.974 | 0.984 | GGGAGttt              |
| P\$AZF3_01       | AZF3         | 847 (+) | 0.937 | 0.962 | gAGTTTatttt           |
| V\$CDX_Q5        | Cdx          | 850 (-) | 1     | 0.904 | TTTATttttctccatgta    |
| V\$CDX1_Q5       | Cdx-1        | 850 (+) | 1     | 1     | TTTATt                |
| V\$MEF2C_Q4      | MEF-2C       | 852 (+) | 1     | 1     | TATTTtt               |
| V\$SPIB_Q3       | Spi-B        | 857 (+) | 1     | 1     | TTCTCc                |
| F\$MATALPHA2_01  | MATalpha2p   | 861 (+) | 1     | 0.976 | cCATGTaata            |
| V\$PMX1_Q6       | PMX1         | 866 (+) | 1     | 1     | TAATAa                |
| V\$PPARG_06      | PPARGAMMA    | 867 (-) | 0.98  | 0.955 | aaTAACCcagaa          |
| V\$ELF1_02       | ELF1         | 870 (+) | 0.751 | 0.842 | aaccAGAAgta           |
| P\$ASR1_01       | ASR-1        | 871 (+) | 1     | 1     | ACCCA                 |

|                   |             |         |       |       |                          |
|-------------------|-------------|---------|-------|-------|--------------------------|
| V\$FOXA1_02       | HNF-3alpha  | 876 (+) | 1     | 0.948 | gaaGTAAAc                |
| V\$LXL1_01        | Lyl-1       | 884 (-) | 1     | 0.911 | ctgttcaCAGCTga           |
| V\$LXL1_02        | Lyl-1       | 884 (-) | 1     | 0.911 | ctgttcaCAGCTga           |
| V\$PAX2_01        | Pax-2       | 884 (-) | 0.97  | 0.86  | ctgttcacagCTGACaagg      |
| V\$ZBTB44_01      | Zbtb44      | 888 (-) | 1     | 1     | tCACAG                   |
| V\$VMAF_01        | v-Maf       | 889 (+) | 1     | 0.883 | cacaGCTGAcaaggcggct      |
| V\$MYOGENIN_Q6_01 | myogenin    | 891 (+) | 1     | 1     | CAGCTg                   |
| V\$MYOGENIN_Q6_01 | myogenin    | 891 (-) | 1     | 1     | cAGCTG                   |
| P\$AT1G53910_02   | AT1G53910   | 891 (+) | 1     | 0.84  | cagtgacaagGCGGcTcgtc     |
| V\$E2F3TBX21_01   | E2F-3:T-bet | 892 (+) | 0.927 | 0.844 | agcTGACAaggcggct         |
| P\$BZIP42_01      | bZIP42      | 892 (+) | 0.623 | 0.775 | agctgACAAGgc             |
| P\$BZIP43_01      | bZIP43      | 892 (-) | 0.624 | 0.785 | agctgACAAGgc             |
| V\$E2F3EOMES_01   | E2F-3:TBR2  | 892 (+) | 0.794 | 0.764 | agctgacaaGGCGGctcgtctttc |
| V\$E2F1EOMES_02   | E2F-1:TBR2  | 892 (+) | 0.951 | 0.818 | agctgacaaGGCGGctcgtctttc |
| V\$E2F3EOMES_01   | E2F-3:TBR2  | 892 (-) | 0.786 | 0.735 | agctgacaagGCGGcTcgtctttc |
| V\$MAFB_01        | MafB        | 893 (+) | 1     | 1     | GCTGAc                   |
| P\$ERF7_02        | ERF7        | 898 (-) | 1     | 0.988 | caagGCGGcT               |
| P\$ERF8_01        | ERF8        | 898 (-) | 0.972 | 0.967 | caaggCGGCT               |
| P\$ERF096_01      | ERF096      | 899 (-) | 1     | 0.991 | aagGCGGcTc               |
| P\$ERF11_01       | ERF11       | 899 (-) | 0.984 | 0.979 | aaggCGGCTc               |
| P\$RRTF1_02       | RRTF1       | 900 (-) | 0.823 | 0.825 | aggCGGCTcg               |
| P\$RAP26_03       | RAP2-6      | 900 (-) | 0.815 | 0.84  | aggCGGCTcg               |
| P\$RAP210_04      | RAP2-10     | 900 (-) | 0.803 | 0.857 | aggCGGCTcg               |
| P\$ERF069_01      | ERF069      | 900 (-) | 0.989 | 0.988 | aggCGGCTc                |
| P\$AT1G68550_03   | AT1G68550   | 900 (+) | 0.949 | 0.952 | aggCGGCTc                |
| P\$ERF1_Q2        | ERF1        | 901 (+) | 1     | 1     | GGCGGctc                 |
| P\$ERF098_01      | ERF098      | 901 (-) | 1     | 0.998 | gGCGGcTc                 |
| P\$BPC1_Q2        | BPC1        | 911 (-) | 1     | 1     | cTTTCT                   |
| V\$FOXO1ETV7_01   | FOXO1A:ETV7 | 917 (+) | 1     | 0.764 | caacACAGgatttccatctt     |
| V\$ERFSREBF2_02   | ERF:SREBP-2 | 918 (-) | 0.562 | 0.732 | aaCACAGgatttccatc        |
| V\$GATAD2A_01     | GATAD2A     | 920 (-) | 1     | 1     | CACAGg                   |
| V\$ELK1ETV7_01    | Elk-1:ETV7  | 920 (-) | 0.669 | 0.772 | cacaggatttccatcttgg      |
| V\$ERG_05         | ERG         | 921 (-) | 0.846 | 0.793 | acAGGATtccatc            |

|                 |            |         |       |       |                    |
|-----------------|------------|---------|-------|-------|--------------------|
| V\$FLI1_04      | FLI1       | 921 (-) | 0.825 | 0.775 | acAGGATtccatc      |
| V\$ELK1SPDEF_01 | Elk-1:PDEF | 921 (-) | 0.946 | 0.832 | acAGGATtccatcttg   |
| V\$OCT1_05      | 1-Oct      | 923 (+) | 0.934 | 0.913 | aggaTTTCCatctt     |
| V\$AP3_Q6_01    | AP-3       | 925 (-) | 1     | 1     | gaTTTCCa           |
| P\$AGL15_02     | AGL15      | 927 (-) | 1     | 0.947 | TTTCCatctttgg      |
| P\$AGL15_03     | AGL15      | 927 (+) | 1     | 0.931 | TTTCCatctttggct    |
| V\$E2F3_05      | E2F-3      | 932 (+) | 0.758 | 0.723 | atctttGGCTCcaacggg |
| V\$E2F2_06      | E2F2       | 932 (-) | 0.881 | 0.759 | atctttgGCTCcaacggg |
| V\$E2F3_05      | E2F-3      | 932 (-) | 0.845 | 0.756 | atctttgGCTCcaacggg |
| V\$E2F4_03      | E2F-4      | 935 (+) | 0.803 | 0.831 | ttTGGCTccaac       |
| V\$E2F1_04      | E2F-1      | 935 (-) | 0.793 | 0.843 | tttGGCTCcaac       |
| V\$E2F4_02      | E2F-4      | 935 (-) | 0.8   | 0.778 | tttGGCTCcaac       |
| V\$E2F4_03      | E2F-4      | 935 (-) | 0.798 | 0.849 | tttggCTCCAac       |
| V\$VMYB_02      | v-Myb      | 941 (+) | 1     | 0.973 | tccAACGGg          |
| P\$AT5G54070_01 | AT5G54070  | 942 (+) | 1     | 1     | cCAACG             |
| P\$MYB3R1_01    | MYB3R1     | 942 (-) | 1     | 0.852 | ccAACGGggttgctt    |
| P\$MYB3R4_01    | MYB3R4     | 942 (-) | 1     | 0.853 | ccAACGGggttgctt    |
| P\$MYB3R5_01    | MYB3R5     | 943 (-) | 1     | 0.857 | cAACGGggttgcttt    |
| V\$NR2C2_04     | TR4        | 945 (-) | 1     | 0.988 | acGGGGT            |
| V\$MIF1_01      | MIF-1      | 947 (-) | 0.769 | 0.826 | ggggttgctttGGATCct |
| V\$MIF1_01      | MIF-1      | 948 (+) | 1     | 0.782 | ggGTTGCtttgatcctg  |
| V\$RFX_Q6_01    | RFX        | 948 (+) | 1     | 0.971 | ggGTTGCtttgga      |
| V\$RFX1_Q6      | Rfx1       | 950 (+) | 1     | 0.963 | GTTGCtttgatcc      |
| P\$CBNAC_01     | CBNAC      | 951 (+) | 1     | 1     | tTGCTT             |
| V\$BLIMP1_03    | Blimp-1    | 951 (+) | 1     | 0.858 | ttgctTTGGAtc       |
| V\$ARID3A_02    | ARID3A     | 962 (+) | 1     | 0.963 | cctgaTATCActag     |
| I\$OPTIX_01     | Optix      | 964 (+) | 1     | 1     | TGATA              |
| I\$OPTIX_01     | Optix      | 967 (-) | 1     | 1     | TATCA              |
| V\$OSR1_04      | OSR1       | 970 (-) | 1     | 0.97  | catctagGTAGCggga   |
| V\$OSR2_04      | OSR2       | 970 (-) | 1     | 0.958 | catctagGTAGCggga   |
| V\$E2F1_11      | E2F-1      | 975 (+) | 1     | 0.941 | aggtaGCGGgaagg     |
| F\$STP4_02      | Stp4p      | 976 (+) | 1     | 0.942 | ggTAGCGgg          |
| V\$E2F4_11      | E2F-4      | 976 (+) | 1     | 0.939 | ggtaGCGGgaagg      |

|                 |                 |         |       |       |                        |
|-----------------|-----------------|---------|-------|-------|------------------------|
| V\$E2F4_05      | E2F-4           | 977 (-) | 1     | 0.942 | gtaGCGGGaagg           |
| V\$E2F1_09      | E2F-1           | 977 (+) | 1     | 0.946 | gtaGCGGGaag            |
| V\$E2F3_07      | E2F-3           | 977 (+) | 1     | 0.939 | gtaGCGGGaag            |
| V\$E2F4_09      | E2F-4           | 978 (+) | 1     | 0.96  | taGCGGGaagg            |
| V\$STAT3_12     | STAT3           | 978 (-) | 0.983 | 0.922 | tagcgGGAAGgggga        |
| V\$ELK1EVX1_01  | Elk-1:EVX1      | 979 (+) | 0.91  | 0.813 | agcGGGAAGggggataa      |
| F\$LEU3_02      | Leu3p           | 980 (-) | 0.915 | 0.9   | GCGGGaagggg            |
| V\$E2F4_Q6      | E2F-4           | 980 (+) | 1     | 0.904 | GCGGGaagggg            |
| V\$E2F1DP1_01   | E2F-1:DP-1      | 980 (-) | 1     | 0.96  | gCGGGAag               |
| V\$GABP_B       | GABP            | 980 (+) | 1     | 0.925 | gcgGGAAGgggg           |
| V\$PET1_03      | Pet-1           | 980 (+) | 1     | 0.988 | gcgGGAAGgg             |
| V\$PET1_04      | Pet-1           | 980 (+) | 1     | 0.988 | gcgGGAAGgg             |
| V\$DR3_Q4       | VDR,            | 983 (-) | 0.848 | 0.837 | ggaagGGGAtaaaggccagg   |
| V\$COUPTF_Q6    | COUPTF          | 984 (-) | 0.927 | 0.887 | gaagggggataaaGCCAgggga |
| V\$CPBP_Q6      | CPBP            | 985 (-) | 1     | 1     | aaGGGGG                |
| V\$PPARG_03     | PPAR            | 985 (+) | 1     | 0.869 | aaggggatAAAGGcca       |
| V\$PPARARXR_01  | PPARALPHA:RXR-A | 985 (+) | 1     | 0.852 | aaggggatAAAGGccag      |
| V\$PPARG_08     | PPARgamma       | 985 (+) | 1     | 0.925 | aaggggatAAAGGcca       |
| V\$PPARA_03     | PPARalpha       | 985 (+) | 1     | 0.919 | aaggggatAAAGGcca       |
| V\$PPARG_09     | PPARgamma       | 985 (+) | 1     | 0.924 | aaggggatAAAGGcca       |
| V\$PPARA_04     | PPARalpha       | 985 (+) | 1     | 0.904 | aaggggatAAAGGcca       |
| V\$PPARG_10     | PPARgamma       | 985 (+) | 1     | 0.915 | aaggggatAAAGGcca       |
| V\$ESRRA_06     | ESRRA           | 985 (+) | 0.876 | 0.776 | aaggggataAAGGCca       |
| V\$PPARGRXRA_03 | PPARGAMMA:RXR-  | 986 (+) | 1     | 0.871 | aggggatAAAGGcc         |
| V\$PPARGRXRA_01 | PPARGAMMA:RXR-a | 987 (+) | 1     | 0.919 | ggggatAAAGGcca         |
| V\$RXRB_02      | Rxrb            | 988 (+) | 1     | 0.78  | gggatAAAGGcca          |
| V\$RXRA_13      | RXR-ALPHA       | 988 (+) | 1     | 0.822 | gggatAAAGGccag         |
| V\$NR2F1_06     | COUP-TF1        | 988 (+) | 0.935 | 0.927 | gggataaaGCCAggg        |
| V\$PPARDR1_Q2   | PPAR            | 989 (-) | 0.854 | 0.868 | gggataaAGGCca          |
| V\$RXRA_16      | RXRALPHA        | 992 (-) | 0.984 | 0.966 | ataaaGCCAggg           |
| V\$ESRRA_07     | ESRRA           | 994 (+) | 0.889 | 0.769 | aaaggccagggAAGGGag     |
| V\$NURR1_Q3     | NURR1           | 995 (-) | 1     | 1     | AAGGCca                |
| V\$REST_13      | REST            | 997 (-) | 0.797 | 0.74  | ggccaGGGAagggagg       |

|                  |              |          |       |       |                          |
|------------------|--------------|----------|-------|-------|--------------------------|
| V\$DPF2_01       | DPF2         | 997 (-)  | 1     | 0.925 | ggccaggGGAAGggag         |
| V\$KAISO_Q2      | Kaiso        | 998 (+)  | 0.938 | 0.929 | gccaggGGAAGg             |
| V\$SPIB_Q3       | Spi-B        | 1002 (-) | 1     | 1     | gGGGAA                   |
| V\$IRF4_07       | IRF-4        | 1003 (+) | 1     | 0.97  | gGGAAGgga                |
| V\$HOXD12ELK1_01 | HOXD12:Elk-1 | 1005 (+) | 0.82  | 0.767 | gaagGGAGGatgtaa          |
| V\$GKLF_Q4       | GKLF         | 1007 (-) | 1     | 1     | agGGAGG                  |
| V\$FOXO1SPDEF_01 | FOXO1A:PDEF  | 1008 (+) | 1     | 0.889 | gggaGGATGtaaa            |
| V\$PEA3_Q6       | PEA3         | 1011 (-) | 1     | 1     | aGGATGt                  |
| V\$HMGYIY_Q3     | HMGYIY       | 1014 (+) | 1     | 0.942 | atgtaAATTTctttt          |
| V\$PARP_Q4       | PARP         | 1021 (+) | 1     | 1     | TTTCTt                   |
| F\$GCN4_01       | Gcn4p        | 1026 (+) | 1     | 0.961 | ttaaggacaTGACTcagaaatgac |
| V\$BATF_07       | B-ATF        | 1026 (+) | 1     | 0.957 | ttaaggacaTGACTcag        |
| F\$GCN4_02       | Gcn4p        | 1029 (-) | 1     | 0.963 | aaggacatgACTCAgaaatga    |
| V\$TCF11MAFG_01  | TCF11:MafG   | 1030 (+) | 1     | 0.835 | aggacATGACTcagaaatgaca   |
| V\$JUN_04        | c-Jun        | 1030 (+) | 1     | 0.986 | aggacaTGACTcag           |
| V\$BATFJUN_01    | c-Jun:B-ATF  | 1032 (+) | 1     | 0.987 | gacaTGACTca              |
| V\$AP1_01        | AP-1         | 1033 (-) | 1     | 0.961 | acaTGACTcagaa            |
| V\$FOSL2_02      | Fra-2        | 1033 (+) | 1     | 0.988 | acaTGACTcag              |
| V\$JUNB_01       | JunB         | 1033 (+) | 1     | 0.987 | acaTGACTcag              |
| V\$JUNBFRA1_01   | JUNB:FRA-1   | 1033 (+) | 1     | 0.977 | acaTGACTcagaa            |
| V\$JUNBFOS_01    | JUNB:C-FOS   | 1033 (-) | 1     | 0.976 | acaTGACTcaga             |
| V\$JUNDFOS_01    | JUND:C-FOS   | 1033 (-) | 1     | 0.977 | acaTGACTcagaa            |
| V\$JUNFRA1_01    | C-JUN:FRA-1  | 1033 (+) | 1     | 0.979 | acaTGACTcagaa            |
| V\$FOS_10        | c-Fos        | 1033 (-) | 1     | 0.989 | acaTGACTcag              |
| V\$AP1_01        | AP-1         | 1033 (+) | 0.968 | 0.959 | acatgACTCAgaa            |
| V\$TRP53_02      | Trp53        | 1033 (-) | 0.726 | 0.795 | acatgactcagAAATGa        |
| V\$NRF2_Q4       | Nrf-2        | 1034 (-) | 1     | 0.907 | caTGACTcagaaa            |
| V\$FOS_06        | c-Fos        | 1034 (-) | 0.995 | 0.996 | caTGACTcaga              |
| V\$NRF2_Q4_01    | Nrf2         | 1034 (+) | 1     | 0.92  | caTGACTcagaaa            |
| V\$JUNBFOSB_01   | JUNB:FOSB    | 1034 (+) | 1     | 0.978 | caTGACTcag               |
| V\$JUNBFRA2_01   | JUNB:FRA-2   | 1034 (+) | 1     | 0.975 | caTGACTcag               |
| V\$FOSBJUND_01   | FOSB:JUND    | 1034 (+) | 1     | 0.945 | caTGACTcaga              |
| V\$JUNDFRA1_01   | JUND:FRA-1   | 1034 (+) | 1     | 0.99  | caTGACTcag               |

|                |             |          |       |       |                |
|----------------|-------------|----------|-------|-------|----------------|
| V\$JUNDFRA2_01 | JUND:FRA-2  | 1034 (+) | 1     | 0.975 | caTGACTcag     |
| V\$JUNFOSB_01  | C-JUN:FOSB  | 1034 (+) | 1     | 0.991 | caTGACTcag     |
| V\$JUNFRA2_01  | C-JUN:FRA-2 | 1034 (-) | 1     | 0.983 | caTGACTcagaa   |
| V\$FOSJUN_02   | C-FOS:C-JUN | 1034 (-) | 1     | 0.974 | caTGACTcag     |
| V\$JUNBJUN_01  | JUNB:C-JUN  | 1034 (+) | 1     | 0.98  | caTGACTcag     |
| V\$FOS_08      | C-FOS       | 1034 (-) | 1     | 0.916 | caTGACTcaga    |
| V\$FOSL1_03    | Fra-1       | 1034 (+) | 1     | 0.99  | caTGACTcaga    |
| V\$FOSL1_05    | Fra-1       | 1034 (-) | 1     | 0.991 | caTGACTcagaa   |
| V\$FRA2_04     | Fra-2       | 1034 (-) | 1     | 0.984 | caTGACTcagaa   |
| V\$JUND_08     | JunD        | 1034 (-) | 1     | 0.989 | caTGACTcaga    |
| V\$JUN_06      | c-Jun       | 1034 (-) | 1     | 0.985 | caTGACTcaga    |
| V\$FOSL1_06    | Fra-1       | 1034 (-) | 1     | 0.991 | caTGACTcagaa   |
| V\$FRA2_05     | Fra-2       | 1034 (-) | 1     | 0.989 | caTGACTcaga    |
| V\$FOS_12      | c-Fos       | 1034 (-) | 1     | 0.982 | caTGACTcagaa   |
| V\$JUND_04     | JunD        | 1034 (-) | 0.978 | 0.969 | catgACTCAg     |
| V\$AP1_C       | AP-1        | 1035 (-) | 1     | 0.985 | aTGACTcag      |
| V\$AP1_Q6_01   | AP-1        | 1035 (+) | 1     | 1     | aTGACTcag      |
| V\$AP1_Q4_01   | AP-1        | 1035 (-) | 1     | 1     | aTGACTca       |
| V\$MAF_Q6_01   | MAF         | 1035 (-) | 1     | 0.965 | aTGACTcagaa    |
| V\$FRA1_Q5     | Fra-1       | 1035 (-) | 1     | 1     | aTGACTca       |
| V\$NFE2_04     | NF-E2       | 1035 (+) | 1     | 1     | aTGACTcag      |
| V\$FOS_02      | c-Fos       | 1035 (+) | 0.997 | 0.961 | aTGACTcag      |
| V\$MAF_Q4      | MAF         | 1035 (-) | 1     | 0.958 | aTGACTcaga     |
| V\$FRA2_01     | FRA-2       | 1035 (+) | 1     | 1     | aTGACTca       |
| V\$JUNB_02     | JUNB        | 1035 (+) | 1     | 1     | aTGACTca       |
| V\$JUND_06     | JUND        | 1035 (-) | 1     | 0.969 | aTGACTcaga     |
| V\$FRA2_03     | Fra-2       | 1035 (+) | 1     | 0.994 | aTGACTcagaa    |
| V\$JUNB_04     | JunB        | 1035 (-) | 1     | 0.99  | aTGACTcagaa    |
| V\$NRF2_03     | Nrf2        | 1035 (-) | 1     | 0.886 | aTGACTcagaaatg |
| V\$JUNB_06     | JunB        | 1035 (-) | 1     | 0.997 | aTGACTcag      |
| V\$JUND_09     | JunD        | 1035 (-) | 1     | 0.988 | aTGACTcagaa    |
| V\$JUN_07      | c-Jun       | 1035 (-) | 1     | 0.993 | aTGACTcaga     |
| V\$AP1_C       | AP-1        | 1035 (+) | 0.989 | 0.993 | atgACTCAg      |



|                 |                    |          |       |       |                         |
|-----------------|--------------------|----------|-------|-------|-------------------------|
| V\$JUN_04       | c-Jun              | 1035 (-) | 0.99  | 0.954 | atgACTCAgaaatg          |
| V\$NFE2_01      | NF-E2              | 1035 (-) | 0.884 | 0.929 | atgacTCAGAA             |
| V\$AP1_02       | AP1                | 1036 (+) | 1     | 1     | TGACTca                 |
| V\$CJUN_Q6      | C-Jun              | 1036 (+) | 1     | 1     | TGACTc                  |
| V\$JUNB_Q6      | JunB               | 1036 (+) | 1     | 1     | TGACTcag                |
| V\$CFOS_Q6      | c-Fos              | 1036 (+) | 1     | 1     | TGACTcag                |
| V\$FRA1_Q6_01   | Fra-1              | 1036 (+) | 1     | 0.999 | TGACTcag                |
| V\$TCF11MAFG_01 | TCF11:MafG         | 1041 (+) | 1     | 0.843 | cagaaATGACacagctcattct  |
| V\$MAFG_Q3      | MafG               | 1044 (+) | 0.861 | 0.801 | aatgacACAGCtca          |
| V\$E2F3EOMES_01 | E2F-3:TBR2         | 1044 (+) | 0.673 | 0.768 | aatgacacAGCTCattctcacc  |
| V\$E2F3EOMES_01 | E2F-3:TBR2         | 1044 (-) | 0.696 | 0.799 | aatgacacaGCTCAttctcacc  |
| V\$NFE2L1_Q5    | Nfe2l1             | 1045 (-) | 1     | 0.977 | aATGACacagct            |
| V\$NRF2_Q4      | Nrf-2              | 1045 (-) | 0.905 | 0.893 | aaTGACAcagctc           |
| V\$NRF2_Q4_01   | Nrf2               | 1045 (+) | 0.925 | 0.912 | aaTGACAcagctc           |
| V\$NFE2L2_01    | NFE2L2             | 1046 (+) | 1     | 0.947 | ATGACacagct             |
| V\$MAF_Q4       | MAF                | 1046 (-) | 0.944 | 0.962 | aTGACAcagc              |
| V\$NRF2_Q3      | Nrf2               | 1046 (-) | 0.846 | 0.855 | aTGACAcagctcat          |
| V\$PPARG_02     | PPARgamma:RXRalpha | 1049 (+) | 0.795 | 0.703 | acacaGCTCAttctcaccagca  |
| V\$PPARG_02     | PPARgamma:RXRalpha | 1049 (-) | 0.899 | 0.686 | acacagctcattcTCACCcagca |
| V\$ESR1_Q3      | ESR1               | 1052 (-) | 0.813 | 0.802 | caGCTCAttctcacc         |
| V\$E2F3TBX21_01 | E2F-3:T-bet        | 1052 (-) | 0.94  | 0.844 | cagctcatTCTCACCc        |
| V\$PAX4_Q2      | Pax-4              | 1057 (+) | 0.974 | 0.88  | cattcTCACCc             |
| V\$ZIC3_Q5      | ZIC3               | 1062 (+) | 1     | 0.967 | tcaccCAGCATgacc         |
| V\$TCF11_Q1     | TCF11              | 1063 (-) | 1     | 0.999 | caccagcATGAC            |
| P\$ASR1_Q1      | ASR-1              | 1064 (+) | 1     | 1     | ACCCA                   |
| V\$PAX5_Q7      | Pax-5              | 1067 (-) | 0.918 | 0.887 | cagcATGAC               |
| V\$PAX5_Q13     | PAX5               | 1067 (+) | 0.83  | 0.879 | cagcATGACcaa            |
| I\$PRD_Q2       | Prd                | 1069 (+) | 0.872 | 0.844 | gcATGACcaa              |
| I\$PRD_Q3       | Prd                | 1077 (+) | 0.969 | 0.899 | aaATCCAatgc             |
| V\$RHOX11_Q7    | Rhox11             | 1084 (+) | 0.991 | 0.992 | tgCTGTAAa               |
| I\$CHES1L_Q2    | CHES1L             | 1084 (+) | 0.801 | 0.805 | tgctgtaaaGATGCcaagaaaag |
| V\$NF1A_Q6_01   | NF-1A              | 1095 (+) | 1     | 1     | tGCCAAg                 |
| F\$RIM101_Q1    | Rim101p            | 1097 (+) | 1     | 1     | CCAAGaaa                |

|                  |             |          |       |       |                      |
|------------------|-------------|----------|-------|-------|----------------------|
| V\$PARP_Q4       | PARP        | 1099 (-) | 1     | 1     | aAGAAA               |
| V\$NKX22_Q2      | NKX2B       | 1104 (+) | 1     | 0.905 | aagtaCACTTgaactgg    |
| V\$NKX25_Q3      | NKX25       | 1104 (+) | 1     | 0.868 | aagtaCACTTgaactg     |
| V\$NKX25_Q6      | CSX         | 1107 (+) | 1     | 0.984 | taCACTTgaac          |
| V\$NKX28_Q1      | NKX2-8      | 1108 (+) | 1     | 0.993 | aCACTTgaa            |
| V\$NKX25_Q1      | Nkx2-5      | 1109 (-) | 1     | 1     | CACTTga              |
| V\$NKX2B_Q3      | NKX2B       | 1109 (+) | 1     | 1     | CACTTga              |
| I\$CT_Q1         | ct          | 1112 (+) | 1     | 1     | tTGAAC               |
| F\$YDR520C_Q1    | Ydr520c     | 1116 (+) | 0.786 | 0.765 | actggcCAGAGaaattctca |
| V\$NF1B_Q6_Q1    | NF-1B       | 1120 (+) | 1     | 0.998 | GCCAGagaa            |
| F\$AMT1_Q2       | AMT1        | 1133 (+) | 1     | 1     | TCAGCtaa             |
| V\$FOXP3_Q6      | FOXP3       | 1136 (+) | 1     | 0.991 | gctaAAACAacag        |
| I\$MIRR_Q1       | mirr        | 1140 (+) | 1     | 1     | AAACA                |
| V\$GATAD2A_Q1    | GATAD2A     | 1143 (-) | 1     | 1     | CACAGg               |
| V\$PMX1_Q6       | PMX1        | 1156 (-) | 1     | 1     | tTATTA               |
| V\$LHX3_Q3       | LHX3        | 1158 (+) | 1     | 1     | ATTAAa               |
| V\$SMAD2_Q6      | Smad2       | 1163 (+) | 1     | 1     | AGACAg               |
| V\$P54NRB_Q5     | p54NRB      | 1170 (+) | 1     | 0.875 | gaatatGGATGttgctgga  |
| V\$FOXO1SPDEF_Q1 | FOXO1A:PDEF | 1172 (+) | 1     | 0.901 | atatGGATGttgc        |
| V\$ZNF777_Q2     | ZNF777      | 1180 (-) | 0.778 | 0.708 | gttgctggACAGGtagcca  |
| V\$OSR1_Q4       | OSR1        | 1185 (-) | 1     | 0.972 | tggacagGTAGCcatc     |
| V\$OSR2_Q4       | OSR2        | 1185 (-) | 1     | 0.949 | tggacagGTAGCcatc     |
| V\$SMAD4_Q6      | SMAD4       | 1187 (+) | 1     | 0.914 | gacaggtAGCCAtct      |
| F\$MOT3_Q1       | MOT3        | 1189 (+) | 1     | 1     | cAGGTA               |
| P\$O2_Q4         | O2          | 1193 (+) | 0.934 | 0.872 | taGCCATctcagc        |
| P\$bZIP42_Q1     | bZIP42      | 1195 (-) | 0.606 | 0.756 | gcCATCTcagcc         |
| P\$bZIP43_Q1     | bZIP43      | 1195 (+) | 0.624 | 0.781 | gcCATCTcagcc         |
| V\$AREB6_Q1      | AREB6       | 1206 (+) | 1     | 0.992 | cacatACCTGtgt        |
| F\$MOT3_Q1       | MOT3        | 1210 (-) | 1     | 1     | TACCTg               |
| V\$GATAD2A_Q1    | GATAD2A     | 1212 (+) | 1     | 1     | cCTGTG               |
| V\$FAC1_Q1       | FAC1        | 1212 (-) | 0.956 | 0.944 | cctgtGTTATgttt       |
| V\$IRX2_Q3       | IRX2        | 1214 (-) | 0.954 | 0.952 | tgtgtTATGTtt         |
| V\$IRX5_Q3       | IRX5        | 1214 (-) | 0.984 | 0.97  | tgtgtTATGTtt         |

|                  |              |          |       |       |                    |
|------------------|--------------|----------|-------|-------|--------------------|
| I\$ARA_01        | ara          | 1216 (-) | 1     | 1     | TGTTA              |
| I\$CAUP_01       | caup         | 1216 (-) | 1     | 1     | TGTTA              |
| V\$FOXP3_Q6      | FOXP3        | 1218 (-) | 1     | 0.996 | ttaTGTTTtctc       |
| V\$FOXP1_05      | FOXP1        | 1220 (+) | 1     | 0.953 | aTGTTTtctctag      |
| I\$MIRR_01       | mirr         | 1221 (-) | 1     | 1     | TGTTT              |
| V\$FOXM1_05      | foxm1        | 1221 (+) | 1     | 0.933 | TGTTTtctctag       |
| V\$ELK1HOXB13_01 | Elk-1:HOXB13 | 1232 (-) | 0.777 | 0.781 | gtctaaaacTTCAGgc   |
| V\$FOXJ2_01      | FOXJ2        | 1251 (+) | 1     | 0.967 | caaaaaacAAACAaaaca |
| V\$HNF3_Q6_01    | HNF3         | 1251 (-) | 1     | 0.975 | caaaaaacAAACAaaaca |
| V\$FOXC1_Q4      | Foxc1        | 1252 (-) | 1     | 1     | aaaaAACAA          |
| V\$FOXP1_05      | FOXP1        | 1252 (-) | 1     | 0.955 | aaaaaacAAACAa      |
| V\$FOXO1_Q5      | FOXO1        | 1253 (+) | 1     | 1     | aaAAACAaa          |
| V\$FOXO1A_Q3     | FOXO1A       | 1253 (-) | 1     | 1     | aaAAACAa           |
| V\$HNF3ALPHA_Q6  | HNF3alpha    | 1253 (-) | 1     | 1     | aaaaacAAACA        |
| V\$HNF3_Q6       | HNF3         | 1253 (+) | 1     | 0.99  | aaaaacAAACAa       |
| V\$HNF3B_01      | HNF3beta     | 1254 (-) | 1     | 0.955 | aaaacAAACAaaaca    |
| V\$HFH3_01       | HFH3         | 1254 (-) | 1     | 0.984 | aaaacAAACAaaa      |
| V\$FOX_Q2        | FOX          | 1254 (-) | 1     | 0.956 | aaaacAAACAaaa      |
| V\$SRY_01        | SRY          | 1255 (+) | 1     | 1     | AAACAa             |
| I\$MIRR_01       | mirr         | 1255 (+) | 1     | 1     | AAACA              |
| V\$FOXO1A_Q5     | FOXO1A       | 1255 (+) | 1     | 1     | AAACAa             |
| V\$SRY_Q6        | SRY          | 1255 (-) | 1     | 1     | aAACAA             |
| V\$FOXD3_01      | FOXD3        | 1255 (-) | 1     | 0.96  | aaacaAACAAaa       |
| V\$SOX4_Q5       | Sox-4        | 1256 (+) | 1     | 1     | AACAAa             |
| V\$HNF3G_Q4      | HNF-3gamma   | 1256 (-) | 1     | 1     | aacAAACA           |
| V\$FOXM1_Q6      | Foxm1        | 1257 (-) | 1     | 1     | acAAACAa           |
| V\$FOXL1_02      | FOXL1        | 1258 (+) | 1     | 0.963 | caaacaaAACAAcaaa   |
| V\$SRY_01        | SRY          | 1259 (+) | 1     | 1     | AAACAa             |
| I\$MIRR_01       | mirr         | 1259 (+) | 1     | 1     | AAACA              |
| V\$FOXO1A_Q5     | FOXO1A       | 1259 (+) | 1     | 1     | AAACAa             |
| V\$SRY_Q6        | SRY          | 1259 (-) | 1     | 1     | aAACAA             |
| V\$FOXL2_Q5      | FOXL2        | 1259 (+) | 1     | 0.96  | aaaCAAAca          |
| V\$FAC1_01       | FAC1         | 1259 (+) | 0.978 | 0.947 | aaacAAAACaaca      |

|                      |              |          |       |       |                           |
|----------------------|--------------|----------|-------|-------|---------------------------|
| V\$SOX4_Q5           | Sox-4        | 1260 (+) | 1     | 1     | AACAAa                    |
| V\$FOXK1_04          | FOXK1        | 1260 (+) | 1     | 0.952 | aacaaaACAACaaag           |
| V\$FOXJ1_04          | FOXJ1        | 1261 (+) | 1     | 0.943 | acaaaACAACaaagc           |
| V\$TCF3_01           | TCF-3        | 1263 (-) | 1     | 0.984 | aaaacaaCAAAGc             |
| I\$MIRR_01           | mirr         | 1264 (+) | 1     | 1     | AAACA                     |
| V\$FOXO1A_Q5         | FOXO1A       | 1264 (+) | 1     | 1     | AAACAa                    |
| V\$SRY_Q6            | SRY          | 1264 (-) | 1     | 1     | aAACAA                    |
| V\$LEF1_Q4           | LEF-1        | 1264 (+) | 1     | 0.995 | aaacaaCAAAGct             |
| V\$TCF7RELATED_Q4    | TCF7RELATED  | 1264 (+) | 1     | 0.991 | aaacaaCAAAGc              |
| V\$TCF1_10           | TCF-1        | 1264 (+) | 1     | 0.967 | aaacaaCAAAGctaac          |
| V\$BETACATENIN_Q6    | Beta-catenin | 1265 (-) | 1     | 0.98  | aacaaCAAAGctaac           |
| V\$SOX10_08          | SOX10        | 1266 (+) | 1     | 0.998 | acaACAAAgct               |
| V\$BETACATENIN_Q3_01 | beta-catenin | 1267 (-) | 1     | 0.996 | caaCAAAG                  |
| V\$BETACATENIN_Q6_01 | beta-catenin | 1267 (-) | 1     | 0.986 | caaCAAAG                  |
| V\$SOX4_Q5           | Sox-4        | 1268 (+) | 1     | 1     | AACAAa                    |
| V\$SOX10_Q6_01       | Sox-10       | 1268 (+) | 1     | 1     | aACAAAg                   |
| V\$SOX10_01          | Sox-10       | 1269 (-) | 1     | 1     | ACAAAg                    |
| V\$TCF1_Q5           | TCF-1        | 1269 (-) | 1     | 1     | aCAAAG                    |
| I\$ARA_01            | ara          | 1276 (+) | 1     | 1     | TAACA                     |
| I\$CAUP_01           | caup         | 1276 (+) | 1     | 1     | TAACA                     |
| V\$HOXA10_Q5         | HOXA10       | 1279 (-) | 1     | 0.997 | cATAAAct                  |
| P\$AT4G12670_01      | AT4G12670    | 1280 (+) | 1     | 0.658 | aTAAACtccaaatataagcccaatt |
| F\$ADR1_Q6           | Adr1p        | 1282 (-) | 0.988 | 0.958 | aaACTCCaaa                |
| P\$TRP2_01           | TRP2         | 1282 (+) | 0.6   | 0.691 | aaactccAAAATataagccc      |
| P\$HSFA2_01          | HSFA2        | 1287 (+) | 1     | 1     | CCAAAa                    |
| V\$FOXL2_Q2          | FOXL2        | 1295 (+) | 1     | 0.936 | taagcccAATTT              |
| V\$TCF1_10           | TCF-1        | 1302 (-) | 0.972 | 0.946 | aatttCTTTCttgta           |
| V\$PARP_Q4           | PARP         | 1304 (+) | 1     | 1     | TTTCTt                    |
| P\$BPC1_Q2           | BPC1         | 1307 (-) | 1     | 1     | cTTTCT                    |
| P\$NAC078_01         | NAC078       | 1307 (-) | 1     | 0.861 | cttTCTTGttattcaat         |
| V\$PARP_Q4           | PARP         | 1308 (+) | 1     | 1     | TTTCTt                    |
| V\$HOXC8_Q3          | HOXC-8       | 1311 (-) | 1     | 0.981 | cttGTTATtc                |
| P\$NAC078_01         | NAC078       | 1311 (+) | 0.742 | 0.874 | cttgttattCAATAaat         |

|                   |              |          |       |       |                   |
|-------------------|--------------|----------|-------|-------|-------------------|
| P\$ATMYB15_Q2     | Myb-15       | 1312 (-) | 1     | 1     | tTGTTA            |
| V\$SOX1_03        | Sox-1        | 1312 (+) | 1     | 0.943 | ttgttATTCaataaat  |
| I\$ARA_01         | ara          | 1313 (-) | 1     | 1     | TGTTA             |
| I\$CAUP_01        | caup         | 1313 (-) | 1     | 1     | TGTTA             |
| V\$FOXJ2HOXB13_01 | FOXJ2:HOXB13 | 1313 (-) | 1     | 0.915 | tgttattcaATAAAAt  |
| V\$ZFP105_04      | ZFP105       | 1314 (+) | 1     | 0.947 | gttatTCAATaaatatt |
| I\$SGF3_Q6        | SGF-3        | 1315 (+) | 1     | 1     | tTATTCa           |
| N\$CEH48_01       | ceh-48       | 1317 (+) | 0.985 | 0.979 | atTCAATaa         |
| V\$OC2_Q3         | OC-2         | 1319 (+) | 1     | 1     | TCAATa            |
| V\$CUX1HOXB13_01  | CDP:HOXB13   | 1319 (+) | 0.716 | 0.831 | tcaataaatATTTAta  |
| I\$CG4328_01      | CG4328       | 1320 (-) | 1     | 1     | cAATAAA           |
| I\$CAD_01         | cad          | 1320 (-) | 1     | 1     | caATAAA           |
| V\$CDX1_Q5        | Cdx-1        | 1321 (-) | 1     | 1     | aATAAA            |
| V\$CUX1HOXB13_01  | CDP:HOXB13   | 1321 (-) | 0.716 | 0.829 | aaTAAATattataga   |
| V\$POU2F2_03      | POU2F2       | 1321 (+) | 0.995 | 0.916 | aataAATATttata    |
| V\$FOXC2_01       | FOXC2        | 1321 (+) | 1     | 0.932 | aataAATATttata    |
| V\$FOXD2_01       | FOXD2        | 1321 (+) | 1     | 0.991 | aataAATATttata    |
| V\$FOXD3_04       | FOXD3        | 1321 (-) | 1     | 0.957 | aataAATATttata    |
| V\$POU2F2_03      | POU2F2       | 1321 (-) | 0.995 | 0.912 | aataaATATTtata    |
| V\$FOXC2_01       | FOXC2        | 1321 (-) | 1     | 0.931 | aataaATATTtata    |
| V\$FOXD2_01       | FOXD2        | 1321 (-) | 1     | 0.99  | aataaATATTtata    |
| V\$FOXD3_04       | FOXD3        | 1321 (+) | 1     | 0.957 | aataaATATTtata    |
| V\$SATB1_Q5_01    | SATB1        | 1322 (-) | 1     | 1     | ATAAAAt           |
| V\$MEF2C_Q4       | MEF-2C       | 1322 (-) | 1     | 1     | atAAATA           |
| V\$POU2F3_04      | POU2F3       | 1322 (+) | 1     | 0.912 | ataAATATttat      |
| V\$POU3F3_04      | POU3F3       | 1322 (+) | 1     | 0.985 | ataAATATttat      |
| V\$POU2F3_04      | POU2F3       | 1322 (-) | 1     | 0.912 | ataaATATTtat      |
| V\$POU3F3_04      | POU3F3       | 1322 (-) | 1     | 0.985 | ataaATATTtat      |
| V\$MEF2C_Q4       | MEF-2C       | 1327 (+) | 1     | 1     | TATTTat           |
| V\$CDXA_02        | CdxA         | 1328 (+) | 1     | 1     | aTTTATa           |
| V\$SATB1_Q5_01    | SATB1        | 1328 (+) | 1     | 1     | aTTTAT            |
| V\$CDX2_Q5_02     | CDX-2        | 1329 (+) | 1     | 1     | TTTATa            |
| I\$VVL_01         | vvl          | 1345 (+) | 1     | 1     | tATGCA            |

|                |         |          |       |       |                        |
|----------------|---------|----------|-------|-------|------------------------|
| V\$XVENT1_01   | Xvent-1 | 1355 (+) | 1     | 0.913 | gcactATTTGaaa          |
| P\$HSFA4A_01   | HSFA4A  | 1357 (+) | 1     | 1     | aCTATT                 |
| V\$DMRT4_01    | DMRT4   | 1359 (-) | 0.94  | 0.944 | tatttGAAACatt          |
| I\$MIRR_01     | mirr    | 1365 (+) | 1     | 1     | AAACA                  |
| V\$MAFF_08     | MafF    | 1366 (-) | 1     | 0.908 | aacattgcagattCAGCA     |
| V\$MAFG_01     | MAFG    | 1367 (-) | 1     | 0.927 | acattgcagatTCAGCagact  |
| V\$MAFF_09     | MafF    | 1367 (-) | 1     | 0.888 | acattgcagatTCAGCagactg |
| V\$MAFB_07     | MafB    | 1369 (+) | 0.859 | 0.92  | attGCAGAttcagcaga      |
| V\$MAFB_07     | MafB    | 1369 (-) | 1     | 0.949 | attgcagatTCAGCaga      |
| V\$MAFK_06     | MAFK    | 1370 (+) | 0.879 | 0.94  | ttGCAGAttcagcag        |
| V\$MAFK_06     | MAFK    | 1370 (-) | 1     | 0.949 | ttgcagatTCAGCag        |
| V\$CMAF_03     | c-MAF   | 1370 (-) | 1     | 0.956 | ttgcagatTCAGCagactg    |
| V\$CMAF_04     | c-MAF   | 1371 (-) | 1     | 0.963 | tgcatTCAGCagact        |
| F\$RDS1_01     | Rds1p   | 1372 (+) | 0.643 | 0.737 | gcagattCAGCagactgcaa   |
| F\$RDS1_01     | Rds1p   | 1372 (-) | 0.643 | 0.735 | gcagattcAGCAGactgcaa   |
| V\$CMAF_Q5     | c-MAF   | 1373 (+) | 1     | 0.965 | cagatTCAGCa            |
| V\$MAFB_09     | MafB    | 1373 (-) | 1     | 0.984 | cagatTCAGCa            |
| V\$MAFB_10     | MafB    | 1373 (-) | 1     | 0.984 | cagatTCAGCa            |
| V\$MAFB_Q4_01  | MAFB    | 1377 (+) | 1     | 1     | tTCAGCa                |
| V\$MAFA_Q4     | MAFA    | 1378 (+) | 1     | 1     | TCAGCag                |
| F\$PDR3_02     | PDR3    | 1378 (+) | 0.8   | 0.75  | TCAGCaga               |
| F\$PDR3_02     | PDR3    | 1378 (-) | 0.8   | 0.75  | tcaGCAGA               |
| V\$SMAD5_Q5_01 | SMAD5   | 1382 (+) | 1     | 0.999 | CAGACTgc               |
| F\$FLP1_01     | Flp     | 1383 (-) | 1     | 1     | agACTGC                |
| I\$MIRR_01     | mirr    | 1391 (+) | 1     | 1     | AAACA                  |
| F\$YBR239C_01  | Ybr239c | 1397 (+) | 0.792 | 0.759 | atcagctTCCCGatcccaga   |
| V\$CETS168_Q6  | c-Ets-1 | 1401 (-) | 1     | 0.98  | gCTTCCcg               |
| V\$STAT_Q6     | STAT    | 1410 (-) | 1     | 0.993 | tccCAGAAagctg          |
| P\$BPC1_Q2     | BPC1    | 1414 (+) | 1     | 1     | AGAAAg                 |
| V\$OC2_Q3      | OC-2    | 1426 (+) | 1     | 1     | TCAATa                 |
| V\$HELIOSA_01  | Helios  | 1428 (+) | 1     | 0.987 | aatAGGGAgag            |
| I\$TRL_02      | GAGA    | 1432 (-) | 1     | 0.935 | ggGAGAGaag             |
| V\$FREAC3_01   | Freac-3 | 1437 (+) | 1     | 0.901 | agaagGTAAcaaatg        |

|                |            |          |       |       |                     |
|----------------|------------|----------|-------|-------|---------------------|
| V\$FOXA2_04    | HNF3-beta  | 1437 (+) | 1     | 0.989 | agaagGTAAAcfaatga   |
| V\$FOXA2_05    | FOXA2      | 1437 (+) | 1     | 0.989 | agaagGTAAAcfaatga   |
| V\$FREAC2_01   | Freac-2    | 1437 (+) | 1     | 0.986 | agaaggTAAACfaatg    |
| V\$FREAC4_01   | Freac-4    | 1437 (+) | 1     | 0.888 | agaaggTAAACfaatg    |
| V\$FOXK1_03    | Foxk1      | 1437 (+) | 1     | 0.986 | agaaggTAAACfaatga   |
| V\$FOXL1_04    | FOXL1      | 1437 (+) | 1     | 0.964 | agaaggTAAACfaatga   |
| V\$FOXP1_03    | FOXP1      | 1437 (+) | 1     | 0.989 | agaaggTAAACfaat     |
| V\$FOXA1_08    | HNF-3alpha | 1437 (-) | 1     | 0.966 | agaaggTAAACfa       |
| V\$HNF3A_02    | HNF-3alpha | 1437 (-) | 1     | 0.967 | agaaggTAAACA        |
| V\$HNF3B_04    | HNF-3beta  | 1437 (-) | 1     | 0.954 | agaaggTAAACA        |
| V\$FOXM1_05    | foxm1      | 1437 (-) | 1     | 0.946 | agaaggTAAACA        |
| V\$ZNF394_04   | ZNF394     | 1437 (+) | 0.969 | 0.894 | agaaggtaacaaaTGAAAa |
| V\$FOXA2_07    | HNF-3beta  | 1438 (-) | 1     | 0.959 | gaaggTAAACA         |
| V\$HNF3B_03    | HNF-3beta  | 1438 (-) | 1     | 0.966 | gaaggTAAACfa        |
| V\$HNF3G_02    | HNF-3gamma | 1438 (-) | 1     | 0.963 | gaaggTAAACfaa       |
| V\$FOXL2_01    | foxl2      | 1438 (-) | 1     | 0.98  | gaaggTAAACA         |
| V\$XFD3_01     | XFD-3      | 1439 (+) | 1     | 0.933 | aagGTAAAcfaatg      |
| V\$FOXA1_02    | HNF-3alpha | 1439 (+) | 1     | 0.979 | aagGTAAAc           |
| F\$NCU00019_01 | FKH1       | 1439 (+) | 1     | 0.999 | aagGTAAAcfaa        |
| V\$HNF3A_03    | HNF-3alpha | 1439 (-) | 1     | 0.982 | aagGTAAAcfa         |
| V\$HNF3B_05    | HNF-3beta  | 1439 (-) | 1     | 0.973 | aagGTAAAcfaat       |
| V\$FOXO1_02    | FOXO1      | 1439 (-) | 1     | 0.976 | aaggTAAACfaatg      |
| V\$FOXJ1_03    | FOXJ1      | 1439 (+) | 1     | 0.997 | aaggTAAACfaatgaa    |
| I\$SLP1_01     | slp1       | 1439 (-) | 1     | 0.992 | aaggTAAACfa         |
| V\$FOXC2_03    | FOXC2      | 1439 (+) | 1     | 0.984 | aaggTAAACfaa        |
| V\$FOXO3A_Q3   | FOXO3A     | 1439 (+) | 1     | 0.996 | aaggTAAACfaat       |
| I\$CROC_02     | Croc       | 1439 (+) | 1     | 0.936 | aaggTAAACfa         |
| V\$FOXA1_07    | HNF-3alpha | 1439 (+) | 1     | 0.975 | aaggTAAACA          |
| V\$FOXK1_11    | FOXK1      | 1439 (-) | 1     | 0.998 | aaggTAAACA          |
| V\$FOXO4_02    | FOXO4      | 1439 (-) | 1     | 0.978 | aaggtaAACAAatg      |
| V\$FOXO3_01    | FOXO3      | 1439 (-) | 1     | 0.984 | aaggtaAACAAatg      |
| V\$HNF3A_01    | HNF3A      | 1440 (+) | 1     | 0.978 | aggtAAACfa          |
| V\$FOXM1_Q3_02 | FOXM1      | 1440 (-) | 1     | 0.987 | aggtAAACA           |

|                 |              |          |  |       |       |                |
|-----------------|--------------|----------|--|-------|-------|----------------|
| V\$FOXK2_02     | FOXK2        | 1440 (+) |  | 1     | 0.998 | aggtAAACAaa    |
| V\$FOXK1_12     | FOXK1        | 1440 (-) |  | 1     | 0.993 | aggtAAACAaa    |
| V\$FOXO1_01     | FOXO1        | 1441 (+) |  | 1     | 0.99  | ggtAAACAaa     |
| V\$FOXO3A_Q1    | FOXO3A       | 1441 (+) |  | 1     | 0.978 | ggtAAACAaatg   |
| V\$FOXO3_02     | FOXO3        | 1441 (+) |  | 1     | 0.977 | ggtAAACA       |
| V\$FOXO1_08     | FOXO1A       | 1441 (-) |  | 1     | 0.964 | ggtAAACAaat    |
| V\$FOXO3_06     | FOXO3a       | 1441 (-) |  | 1     | 0.995 | ggtAAACAaa     |
| V\$FOXI1_02     | FOXI1        | 1442 (+) |  | 1     | 1     | GTAAACA        |
| V\$FOXG1_06     | FOXG1        | 1442 (+) |  | 1     | 1     | gTAAACAa       |
| V\$FOXD2_02     | FOXD2        | 1442 (+) |  | 1     | 1     | gtAAACA        |
| V\$FOXD3_05     | FOXD3        | 1442 (+) |  | 1     | 1     | gtAAACA        |
| V\$FOXJ2_04     | FOXJ2        | 1442 (+) |  | 1     | 1     | gtAAACAa       |
| V\$FOXJ3_07     | FOXJ3        | 1442 (+) |  | 1     | 1     | gtAAACAa       |
| V\$FOXL1_05     | FOXL1        | 1442 (+) |  | 1     | 1     | gtAAACA        |
| V\$FOXO1_05     | FOXO1        | 1442 (+) |  | 1     | 1     | gtAAACAa       |
| V\$FOXO3_04     | FOXO3        | 1442 (+) |  | 1     | 1     | gtAAACAa       |
| V\$FOXO4_04     | FOXO4        | 1442 (+) |  | 1     | 1     | gtAAACA        |
| V\$FOXO6_02     | FOXO6        | 1442 (+) |  | 1     | 1     | gtAAACA        |
| V\$FOXP3_03     | FOXP3        | 1442 (+) |  | 1     | 1     | gtAAACA        |
| V\$FOXG1_05     | Foxg1        | 1442 (+) |  | 1     | 1     | gtAAACA        |
| V\$FOXJ3_12     | Foxj3        | 1442 (+) |  | 1     | 1     | gtAAACAa       |
| V\$FOXK1_07     | Foxk1        | 1442 (+) |  | 1     | 1     | gtAAACA        |
| V\$FOXJ2_06     | Foxj2        | 1442 (+) |  | 1     | 1     | gtAAACAa       |
| N\$FKH2_01      | fkH-2        | 1442 (+) |  | 1     | 1     | gtAAACAa       |
| V\$FOXP1_06     | FOXP1        | 1442 (-) |  | 1     | 1     | gtAAACAaa      |
| V\$FOXO1_10     | FOXO1A       | 1442 (-) |  | 1     | 0.989 | gtAAACAaat     |
| V\$SRY_01       | SRY          | 1444 (+) |  | 1     | 1     | AAACAaa        |
| I\$MIRR_01      | mirr         | 1444 (+) |  | 1     | 1     | AAACA          |
| V\$FOXO1A_Q5    | FOXO1A       | 1444 (+) |  | 1     | 1     | AAACAa         |
| V\$SRY_Q6       | SRY          | 1444 (-) |  | 1     | 1     | aAACAA         |
| V\$SOX4_Q5      | Sox-4        | 1445 (+) |  | 1     | 1     | AACAAa         |
| V\$FOXP3_Q6     | FOXP3        | 1451 (+) |  | 1     | 0.991 | tgaaAAACAgaa   |
| V\$FOXO1ELF1_01 | FOXO1A:Elf-1 | 1451 (+) |  | 0.808 | 0.859 | tgaaaaACAGAaac |



|                 |              |          |       |       |                     |
|-----------------|--------------|----------|-------|-------|---------------------|
| V\$STAT1_11     | STAT1        | 1452 (-) | 1     | 0.898 | gaaaaacaGAAACaacagt |
| I\$MIRR_01      | mirr         | 1455 (+) | 1     | 1     | AAACA               |
| V\$IRF2_03      | IRF-2        | 1455 (+) | 0.996 | 0.956 | aaacaGAAACaa        |
| I\$MIRR_01      | mirr         | 1461 (+) | 1     | 1     | AAACA               |
| V\$FO XO1A_Q5   | FO XO1A      | 1461 (+) | 1     | 1     | AAACAa              |
| V\$SRY_Q6       | SRY          | 1461 (-) | 1     | 1     | aAACAA              |
| F\$NIT2_01      | NIT2         | 1470 (-) | 1     | 1     | tAGATA              |
| P\$BHLH64_02    | bHLH64       | 1475 (+) | 1     | 1     | ACCAGt              |
| V\$TCF1_10      | TCF-1        | 1480 (+) | 1     | 0.956 | taagagCAAAGatgaa    |
| V\$EAR2_Q2      | EAR2         | 1481 (-) | 1     | 0.926 | aagagCAAAGatga      |
| V\$OCT1_Q6      | 1-Oct        | 1487 (+) | 0.893 | 0.92  | aaagatGAAAAttaa     |
| V\$POU3F1_04    | POU3F1       | 1488 (+) | 1     | 0.903 | aagATGAAaattaagg    |
| V\$OCT1_05      | 1-Oct        | 1488 (-) | 0.934 | 0.911 | aagatGAAAAttaa      |
| V\$POU2F2_08    | 2-Oct        | 1489 (-) | 0.879 | 0.907 | agATGAAaattaa       |
| V\$OCT_C        | OCT-x        | 1489 (-) | 0.884 | 0.888 | agatGAAAAttaa       |
| V\$OCT_Q6       | Octamer      | 1490 (-) | 0.957 | 0.955 | gATGAAaatta         |
| I\$FTZ_01       | Ftz          | 1491 (+) | 1     | 0.926 | atgaaaATTAAG        |
| V\$PRRX2_03     | Prrx2        | 1496 (+) | 1     | 1     | AATTA               |
| V\$DLX5_Q3      | Dlx-5        | 1496 (+) | 1     | 1     | AATTAa              |
| V\$DRI1_01      | DRI1         | 1496 (+) | 1     | 1     | aATTAA              |
| V\$TEAD4ELF1_01 | TEF-3:Elf-1  | 1503 (+) | 0.817 | 0.838 | gcaatGGGGAaatg      |
| V\$SPI1_11      | PU.1         | 1503 (+) | 0.919 | 0.878 | gcaatgggGAAATgagc   |
| V\$SPI1_12      | PU.1         | 1503 (+) | 0.937 | 0.889 | gcaatgggGAAATgag    |
| V\$SOX18_Q5     | Sox-18       | 1504 (+) | 1     | 1     | CAATGgg             |
| V\$IRF4_11      | IRF-4        | 1504 (+) | 0.98  | 0.864 | caatggggAAATGagcga  |
| V\$CEBPD_Q6     | C/EBPdelta   | 1505 (-) | 0.986 | 0.962 | aatgggGAAATg        |
| V\$CEBPG_Q6_01  | C/EBPgamma   | 1505 (+) | 1     | 0.977 | aatgggGAAATg        |
| V\$SPIB_Q3      | Spi-B        | 1508 (-) | 1     | 1     | gGGGAA              |
| V\$E2F3DRGX_01  | E2F-3:Prrx1l | 1511 (-) | 0.807 | 0.785 | gaaATGAGCgac        |
| V\$ZNF777_02    | ZNF777       | 1513 (-) | 0.778 | 0.71  | aatgagcgACTGGgtggct |
| V\$GLI1_02      | GLI          | 1521 (+) | 1     | 0.874 | actgGGTGGctc        |
| P\$ASR1_01      | ASR-1        | 1523 (-) | 1     | 1     | TGGGT               |
| V\$KID3_01      | Kid3         | 1525 (-) | 1     | 1     | GGTGG               |

|                |            |          |       |       |                 |
|----------------|------------|----------|-------|-------|-----------------|
| V\$GKLF_Q3     | GKLF       | 1527 (-) | 0.99  | 0.976 | tggtCCTCCcttt   |
| V\$BTEB3_Q5    | BTEB3      | 1529 (-) | 1     | 0.97  | gctCCTCCctttg   |
| V\$GKLF_Q4     | GKLF       | 1532 (+) | 1     | 1     | CCTCCct         |
| V\$SOX18_Q5    | Sox-18     | 1535 (-) | 1     | 1     | ccCTTTG         |
| V\$GLI1_Q3     | GLI        | 1539 (-) | 1     | 0.965 | ttGGGTGgta      |
| V\$GLI_Q3      | GLI        | 1539 (+) | 1     | 0.989 | ttGGGTGgtt      |
| P\$ASR1_01     | ASR-1      | 1540 (-) | 1     | 1     | TGGGT           |
| V\$GLI2_Q6     | GLI2       | 1540 (+) | 1     | 0.971 | TGGGTggtag      |
| V\$ZIC3_01     | Zic3       | 1540 (+) | 1     | 0.945 | tGGGTGgtt       |
| V\$ZIC1_01     | Zic1       | 1540 (+) | 1     | 0.904 | tgGGTGGtt       |
| N\$TRA1_01     | Tra-1      | 1540 (+) | 0.998 | 0.998 | tgGGTGGt        |
| N\$TRA1_02     | Tra-1      | 1540 (+) | 1     | 1     | tggtTGGT        |
| P\$C1_Q2       | C1         | 1540 (-) | 0.996 | 0.982 | tggtTGGTtag     |
| V\$KID3_01     | Kid3       | 1542 (-) | 1     | 1     | GGTGG           |
| V\$ELK1_Q6     | Elk-1      | 1551 (+) | 1     | 1     | GGAAGt          |
| I\$TLL_03      | Tll        | 1552 (+) | 0.631 | 0.809 | gaagtcagcCAGGCa |
| V\$MAFB_01     | MafB       | 1555 (-) | 1     | 1     | gTCAGC          |
| V\$NF1C_02     | NF1C       | 1558 (+) | 1     | 1     | aGCCAGg         |
| F\$MOT3_01     | MOT3       | 1561 (+) | 1     | 1     | cAGGCA          |
| V\$ZNF35_04    | ZNF35      | 1569 (+) | 1     | 1     | gGAAGA          |
| V\$E2F1_11     | E2F-1      | 1570 (+) | 1     | 0.94  | gaagaGCGGgaagc  |
| V\$E2F4_11     | E2F-4      | 1571 (+) | 1     | 0.935 | aagaGCGGgaagc   |
| V\$E2F4_05     | E2F-4      | 1572 (-) | 1     | 0.944 | agaGCGGgaagc    |
| V\$E2F1_09     | E2F-1      | 1572 (+) | 1     | 0.968 | agaGCGGgaag     |
| V\$E2F3_07     | E2F-3      | 1572 (+) | 1     | 0.945 | agaGCGGgaag     |
| V\$E2F4_09     | E2F-4      | 1573 (+) | 1     | 0.963 | gaGCGGgaagc     |
| V\$ETS2_03     | c-Ets-2    | 1574 (+) | 1     | 0.985 | agcgGGAAGcaga   |
| V\$E2F4_Q6     | E2F-4      | 1575 (+) | 1     | 0.945 | GCGGgaagca      |
| V\$E2F1DP1_01  | E2F-1:DP-1 | 1575 (-) | 1     | 0.96  | gCGGgaag        |
| V\$KAISO_Q2    | Kaiso      | 1575 (+) | 0.986 | 0.936 | gcggaAGCAGa     |
| V\$CETS168_Q6  | c-Ets-1    | 1576 (+) | 1     | 0.98  | cgGGAAGc        |
| V\$SPIB_Q3     | Spi-B      | 1582 (-) | 1     | 1     | gCAGAA          |
| V\$TFIIL_Q6_01 | TFIIL      | 1583 (+) | 0.979 | 0.979 | cAGAAgtgc       |

|                  |                   |          |       |       |                      |
|------------------|-------------------|----------|-------|-------|----------------------|
| P\$BPC1_Q2       | BPC1              | 1584 (+) | 1     | 1     | AGAAAg               |
| V\$LTF_Q6        | LTF               | 1585 (-) | 1     | 0.992 | gaaAGTGcC            |
| F\$MOT3_01       | MOT3              | 1590 (-) | 1     | 1     | TGCCTg               |
| V\$HES1_02       | Hes1              | 1594 (+) | 0.96  | 0.957 | tgCACGGgaa           |
| V\$DEC1_05       | 1-Dec             | 1594 (+) | 0.843 | 0.861 | tgCACGGGaa           |
| V\$RFX3SREBF2_01 | rfx3:SREBP-2      | 1594 (-) | 0.835 | 0.758 | tgcaCGGGAagctgcaag   |
| F\$PHO4_03       | Pho4p             | 1595 (+) | 0.965 | 0.927 | GCACGgg              |
| V\$CETS168_Q6    | c-Ets-1           | 1598 (+) | 1     | 0.98  | cgGGAAGc             |
| V\$PPARA_01      | PPARalpha:RXRalph | 1603 (+) | 1     | 0.806 | agctgcaagggCAAAGgtcc |
| V\$HSF4_Q3       | HSF4              | 1605 (+) | 1     | 1     | CTGCAag              |
| V\$HDAC1_Q3      | HDAC1             | 1606 (+) | 1     | 0.981 | tgCAAGGgc            |
| V\$PPARG_01      | PPARgamma:RXRalph | 1606 (+) | 0.792 | 0.821 | tgcaaGGCAaaggtcccgat |
| V\$PPARG_03      | PPAR              | 1606 (+) | 1     | 0.896 | tgcaagggcAAAGGtcc    |
| V\$PPARARXRA_01  | PPARALPHA:RXR-A   | 1606 (+) | 1     | 0.868 | tgcaagggcAAAGGtccc   |
| V\$PPARG_08      | PPARgamma         | 1606 (+) | 1     | 0.873 | tgcaagggcAAAGGtcc    |
| V\$PPARA_03      | PPARalpha         | 1606 (+) | 1     | 0.869 | tgcaagggcAAAGGtcc    |
| V\$PPARG_09      | PPARgamma         | 1606 (+) | 1     | 0.876 | tgcaagggcAAAGGtcc    |
| V\$PPARG_10      | PPARgamma         | 1606 (+) | 1     | 0.867 | tgcaagggcAAAGGtcc    |
| V\$HNF4_01       | HNF-4             | 1607 (+) | 1     | 0.953 | gcaagggCAAAGgtcccga  |
| V\$PPARGRXRA_03  | PPARGAMMA:RXR-    | 1607 (+) | 1     | 0.947 | gcaagggcAAAGGtc      |
| V\$PPARGRXRA_01  | PPARgamma:RXR-a   | 1608 (+) | 1     | 0.909 | caagggcAAAGGtcc      |
| I\$USP_02        | CF1               | 1608 (+) | 0.822 | 0.829 | caagggcaaaGGTCC      |
| V\$HNF4_01_B     | HNF4alpha1        | 1609 (+) | 1     | 0.946 | aagggCAAAGgtccc      |
| V\$EAR2_Q2       | EAR2              | 1609 (-) | 1     | 0.938 | aagggCAAAGgtcc       |
| V\$HNF4A_06      | HNF4A             | 1609 (+) | 1     | 0.858 | aagggCAAAGgtcc       |
| V\$RXRA_05       | RXRA              | 1609 (+) | 1     | 0.819 | aagggCAAAGgtcc       |
| V\$RXRB_02       | Rxrb              | 1609 (+) | 1     | 0.801 | aagggcAAAGGtcc       |
| V\$RXRA_13       | RXR-ALPHA         | 1609 (+) | 1     | 0.898 | aagggcAAAGGtccc      |
| V\$NR2F1_02      | COUP-TF1          | 1609 (+) | 1     | 0.841 | aagggcaaAGGTCC       |
| V\$COUP_01       | COUP-TF,          | 1609 (-) | 0.857 | 0.912 | aagggcaaaGGTCC       |
| V\$DR1_Q3        | PPAR,             | 1610 (+) | 1     | 0.938 | agggCAAAGgtcc        |
| V\$HNF4DR1_Q3    | HNF4              | 1610 (-) | 1     | 0.914 | agggCAAAGgtcc        |
| V\$HNF4A_03      | HNF4A             | 1610 (+) | 1     | 0.964 | agggCAAAGgtcc        |

|                   |             |          |       |       |                        |
|-------------------|-------------|----------|-------|-------|------------------------|
| V\$PPARDR1_Q2     | PPAR        | 1610 (-) | 1     | 0.952 | agggcaaAGGTCC          |
| V\$COUPDR1_Q6     | COUP        | 1610 (-) | 1     | 0.935 | agggcaaAGGTCC          |
| V\$HNF4ALPHA_Q6   | HNF4alpha   | 1611 (-) | 1     | 0.925 | gggCAAAGgtccc          |
| V\$HNF4A_Q6_01    | HNF-4alpha  | 1611 (+) | 1     | 0.963 | gggCAAAGgtcccgga       |
| V\$MYBL1ELF1_01   | A-Myb:Elf-1 | 1614 (-) | 0.796 | 0.739 | cAAAGGtccccgatg        |
| V\$RELA_05        | RelA-p65    | 1616 (+) | 1     | 0.923 | aagGTCCC               |
| F\$YBR239C_02     | Ybr239c     | 1619 (-) | 0.8   | 0.811 | gTCCCGat               |
| F\$LEU3_02        | Leu3p       | 1622 (-) | 0.884 | 0.932 | CCGATgccgg             |
| F\$LEU3_02        | Leu3p       | 1622 (+) | 0.989 | 0.982 | ccgatGCCGG             |
| V\$STAT3_03       | STAT3       | 1624 (+) | 1     | 0.955 | gattccaGGGAAtct        |
| V\$STAT3_11       | STAT3       | 1625 (-) | 1     | 0.956 | atgccGGGAAG            |
| V\$STAT3_14       | STAT3       | 1626 (-) | 1     | 0.962 | tgccgGGGAAGat          |
| V\$ELK1HOXA3_01   | Elk-1:HOXA3 | 1627 (+) | 0.922 | 0.764 | gcCGGGAagatcttgagggttg |
| V\$ZNF35_04       | ZNF35       | 1631 (+) | 1     | 1     | gGAAGA                 |
| V\$PRDM16_05      | MEL1        | 1632 (+) | 1     | 1     | GAAGAt                 |
| V\$SPZ1_01        | Spz1        | 1638 (+) | 1     | 0.967 | cttGGAGGgtttgtg        |
| V\$TAXCREB_02     | Tax/CREB    | 1642 (-) | 0.6   | 0.743 | gagggtttgTGACAc        |
| P\$ANAC094_01     | ANAC094     | 1643 (-) | 0.974 | 0.808 | agggtttgtgacACGGAA     |
| V\$ZNF777_02      | ZNF777      | 1647 (-) | 0.832 | 0.709 | tttgtgacACGGAaggct     |
| F\$YBR239C_02     | Ybr239c     | 1654 (+) | 1     | 0.933 | caCGGAAG               |
| V\$TEL1_01        | TEL1        | 1654 (+) | 1     | 0.989 | caCGGAAGgg             |
| V\$TEL1_02        | TEL1        | 1654 (+) | 1     | 0.989 | caCGGAAGgg             |
| V\$ELK1ONECUT2_01 | Elk-1:OC-2  | 1654 (+) | 1     | 0.708 | caCGGAAGggctgggtg      |
| V\$GCM1ELF1_02    | GCMa:Elf-1  | 1654 (+) | 1     | 0.876 | caCGGAAGggctggt        |
| V\$ELK1_11        | Elk-1       | 1654 (+) | 1     | 0.885 | caCGGAAGggc            |
| V\$ELF5_03        | Elf5        | 1654 (+) | 1     | 0.98  | cacGGAAGgg             |
| V\$GABPA_Q4       | GABP-alpha  | 1656 (-) | 1     | 1     | cGGAAG                 |
| P\$bZIP43_01      | bZIP43      | 1662 (-) | 0.588 | 0.762 | ggctgGTGTGgc           |
| V\$TBX5_05        | Tbx5        | 1663 (+) | 1     | 0.951 | gctGGTGTggctgga        |
| V\$AML2_Q3        | AML2        | 1665 (-) | 1     | 1     | tggtGTGG               |
| F\$MET31_01       | Met31p      | 1666 (+) | 1     | 1     | ggTGTGGc               |
| V\$MYF6_04        | MYF6        | 1666 (-) | 1     | 0.904 | ggtgtGGCTGgatt         |
| V\$GEMIN3_01      | GEMIN3      | 1681 (+) | 0.998 | 0.941 | agtGGGAGaggagaa        |

|                   |                |          |       |       |                           |
|-------------------|----------------|----------|-------|-------|---------------------------|
| V\$GKLF_Q3_01     | GKLF           | 1681 (+) | 0.989 | 0.991 | agtgggaGAGGGa             |
| I\$TRL_02         | GAGA           | 1684 (-) | 1     | 0.911 | ggGAGAGgga                |
| V\$NKX25_08       | CSX            | 1684 (+) | 1     | 0.996 | ggGAGAGg                  |
| V\$RXRA_04        | RXR-ALPHA      | 1690 (+) | 1     | 0.931 | gggagAAGGTtataag          |
| V\$SPIB_Q3        | Spi-B          | 1691 (-) | 1     | 1     | gGAGAA                    |
| V\$PPARGRXRA_02   | PPARGAMMA:RXR- | 1694 (+) | 0.97  | 0.892 | gaaGGTTAtaaggggag         |
| V\$GCM1FOXO1_01   | GCMa:FOXO1A    | 1697 (+) | 1     | 0.822 | ggttatAAGGGgag            |
| I\$TRL_02         | GAGA           | 1706 (-) | 1     | 0.935 | ggGAGAGaag                |
| F\$HSF_02         | HSF            | 1711 (+) | 0.997 | 0.903 | AGAAGagatcagaaa           |
| V\$LEF1_09        | LEF-1          | 1715 (-) | 0.985 | 0.962 | gagatcaGAAAGgc            |
| I\$TLL_03         | TII            | 1715 (+) | 0.84  | 0.791 | gagatcagaAAGGCa           |
| P\$BPC1_Q2        | BPC1           | 1721 (+) | 1     | 1     | AGAAAg                    |
| V\$MYOGENIN_Q6    | myogenin       | 1726 (+) | 1     | 1     | ggCAGCTg                  |
| V\$OLIG2_02       | OLIG2          | 1726 (+) | 1     | 0.944 | ggcAGCTGgggagcaggctg      |
| V\$ITF2_02        | ITF-2          | 1726 (+) | 1     | 1     | ggcAGCTGgg                |
| V\$AP4_Q6_01      | AP-4           | 1727 (-) | 1     | 0.981 | gCAGCTggg                 |
| V\$LBP1_Q6        | LBP-1          | 1727 (-) | 1     | 1     | gcAGCTG                   |
| V\$MYOGENIN_Q6_01 | myogenin       | 1728 (+) | 1     | 1     | CAGCTg                    |
| V\$MYOGENIN_Q6_01 | myogenin       | 1728 (-) | 1     | 1     | cAGCTG                    |
| V\$KAISO_Q2       | Kaiso          | 1730 (+) | 0.986 | 0.97  | gctgggAGCAGg              |
| V\$AR_02          | AR             | 1759 (+) | 1     | 0.968 | tagccagggacagttTGTTcctggc |
| V\$PR_01          | PR             | 1759 (+) | 1     | 0.982 | tagccagggacagttTGTTcctggc |
| V\$GR_01          | GR             | 1759 (+) | 1     | 0.992 | tagccagggacagttTGTTcctggc |
| V\$AR_03          | AR             | 1759 (+) | 1     | 0.975 | tagccagggacagttTGTTcctggc |
| V\$PR_02          | PR             | 1759 (+) | 1     | 0.984 | tagccagggacagttTGTTcctggc |
| V\$NF1C_02        | NF1C           | 1760 (+) | 1     | 1     | aGCCAGg                   |
| V\$NR3C1_01       | NR3C1          | 1763 (-) | 1     | 0.92  | cagGGACAgttgttctc         |
| V\$AR_14          | AR             | 1763 (-) | 0.959 | 0.967 | cagGGACAgttgttct          |
| V\$GR_Q6          | GR             | 1763 (+) | 1     | 0.988 | cagggacagttTGTTcct        |
| V\$AR_08          | AR             | 1764 (-) | 0.976 | 0.937 | agGGACAgttgttctc          |
| V\$AR_09          | AR             | 1764 (-) | 0.968 | 0.936 | agGGACAgttgttctc          |
| V\$NR3C1_03       | NR3C1          | 1764 (-) | 0.985 | 0.962 | agGGACAgttgttctc          |
| V\$AR_10          | AR             | 1764 (+) | 0.977 | 0.968 | agGGACAgttgttctc          |

|               |        |          |       |       |                  |
|---------------|--------|----------|-------|-------|------------------|
| V\$PR_03      | PR     | 1764 (-) | 0.98  | 0.904 | agGGACAgttgttct  |
| V\$AR_16      | AR     | 1764 (-) | 0.995 | 0.934 | agGGACAgttgttct  |
| V\$MYB_10     | c-Myb  | 1764 (+) | 1     | 0.944 | agggaCAGTTtg     |
| V\$NR3C1_01   | NR3C1  | 1764 (+) | 0.989 | 0.852 | agggacagttGTTcct |
| V\$AR_08      | AR     | 1764 (+) | 0.998 | 0.95  | agggacagttGTTcct |
| V\$AR_09      | AR     | 1764 (+) | 0.981 | 0.946 | agggacagttGTTcct |
| V\$NR3C1_03   | NR3C1  | 1764 (+) | 1     | 0.96  | agggacagttGTTcct |
| V\$AR_01      | AR     | 1765 (-) | 0.975 | 0.912 | gGGACAgttgttct   |
| V\$AR_04      | AR     | 1765 (-) | 0.982 | 0.888 | gGGACAgttgttct   |
| V\$AR_13      | AR     | 1765 (-) | 0.883 | 0.883 | gGGACAgttgttct   |
| V\$GR_02      | GR     | 1765 (-) | 0.99  | 0.948 | gGGACAgttgttct   |
| V\$NR3C1_10   | GR     | 1765 (+) | 0.998 | 0.993 | gGGACAgttgttct   |
| V\$GR_03      | GR     | 1765 (+) | 0.993 | 0.919 | gGGACAgttgttct   |
| V\$AR_01      | AR     | 1765 (+) | 1     | 0.978 | gggacagttGTTcct  |
| V\$AR_04      | AR     | 1765 (+) | 1     | 0.98  | gggacagttGTTcct  |
| V\$NR3C1_04   | GR     | 1765 (+) | 1     | 0.974 | gggacagttGTTc    |
| V\$AR_13      | AR     | 1765 (+) | 1     | 0.884 | gggacagttGTTcct  |
| V\$GR_02      | GR     | 1765 (+) | 1     | 0.978 | gggacagttGTTcct  |
| V\$AR_14      | AR     | 1765 (+) | 1     | 0.986 | gggacagttGTTcct  |
| V\$NR3C1_10   | GR     | 1765 (-) | 1     | 0.937 | gggacagttGTTcct  |
| V\$GR_03      | GR     | 1765 (-) | 1     | 0.993 | gggacagttGTTcct  |
| V\$PR_03      | PR     | 1765 (+) | 1     | 0.958 | gggacagttGTTcct  |
| V\$AR_16      | AR     | 1765 (+) | 1     | 0.983 | gggacagttGTTcct  |
| V\$GRE_C      | GR     | 1765 (+) | 1     | 0.943 | gggacagttGTTcct  |
| V\$AR_Q2      | AR     | 1765 (+) | 1     | 0.855 | gggacagttGTTCT   |
| V\$NR3C1_04   | GR     | 1766 (-) | 0.991 | 0.933 | GGACAgttgttct    |
| V\$AR_Q6_01   | AR     | 1766 (+) | 1     | 0.992 | ggacagttGTTcct   |
| V\$AR_10      | AR     | 1766 (-) | 1     | 0.987 | ggacagttGTTcct   |
| V\$GR_Q6_02   | GR     | 1769 (+) | 1     | 0.999 | cagttGTTcct      |
| V\$SOX4_Q5    | Sox-4  | 1772 (-) | 1     | 1     | tTTGTT           |
| V\$SOX17_Q2   | Sox-17 | 1773 (+) | 1     | 1     | TTGTTc           |
| F\$HSF_01     | HSF    | 1775 (-) | 1     | 1     | GTTCT            |
| V\$NF1B_Q6_01 | NF-1B  | 1776 (-) | 1     | 0.998 | ttctCTGGC        |

|                |           |          |       |       |                      |
|----------------|-----------|----------|-------|-------|----------------------|
| F\$YBR239C_01  | Ybr239c   | 1782 (+) | 0.787 | 0.767 | ggcatttTCCAGcactgatt |
| V\$NFAT3_Q3_01 | NFATc4    | 1785 (-) | 1     | 1     | atTTTCCa             |
| V\$NFAT1_Q6    | NFATc2    | 1786 (-) | 1     | 1     | tTTTCC               |
| V\$NFAT4_Q3    | NFATc3    | 1786 (-) | 1     | 1     | tTTTCC               |
| V\$NFATC2_01   | NFATc2    | 1786 (+) | 1     | 1     | tTTTCCa              |
| V\$NFAT1_Q4    | NFATc2    | 1786 (-) | 1     | 1     | tTTTCC               |
| V\$SOX10_09    | Sox-10    | 1794 (+) | 1     | 0.9   | cactgattgcATTGTa     |
| V\$LHX8_06     | Lhx8      | 1797 (+) | 1     | 1     | TGATTg               |
| V\$BRN1_Q6     | BRN1      | 1801 (-) | 1     | 1     | tGCATTg              |
| V\$SOX10_Q6_01 | Sox-10    | 1803 (-) | 1     | 1     | cATTGTa              |
| V\$SOX12_04    | Sox-12    | 1805 (+) | 1     | 0.933 | ttgtacACAAAgtagg     |
| V\$SOX10_Q6    | Sox-10    | 1810 (-) | 1     | 1     | cACAAAg              |
| V\$SOX10_Q6_01 | Sox-10    | 1810 (+) | 1     | 1     | cACAAAg              |
| V\$SOX10_01    | Sox-10    | 1811 (-) | 1     | 1     | ACAAAg               |
| V\$TCF1_Q5     | TCF-1     | 1811 (-) | 1     | 1     | aCAAAG               |
| V\$YB1_Q4      | YB-1      | 1820 (+) | 1     | 0.984 | gcacCCAATga          |
| V\$ALPHACP1_01 | alpha-CP1 | 1821 (+) | 1     | 0.966 | cacCCAATgag          |
| P\$ASR1_01     | ASR-1     | 1822 (+) | 1     | 1     | ACCCA                |
| V\$PAX3_01     | Pax-3     | 1825 (-) | 0.774 | 0.797 | caatgagtGATGA        |
| V\$FOSBJUND_01 | FOSB:JUND | 1826 (-) | 0.929 | 0.943 | aatgAGTGAtg          |
| V\$JUND_08     | JunD      | 1826 (+) | 0.825 | 0.873 | aatgAGTGAtg          |
| V\$FOXM1_Q3    | FOXM1     | 1827 (+) | 0.985 | 0.907 | atGAGATgGactga       |
| V\$IPF1_07     | ipf1      | 1828 (+) | 0.862 | 0.912 | TGAGTgatg            |
| V\$PAX8_B      | Pax-8     | 1828 (+) | 0.886 | 0.878 | tgagtgatGAATGaacaa   |
| V\$IPF1_07     | ipf1      | 1832 (+) | 0.924 | 0.877 | TGATGaattg           |
| V\$SOX17_Q2    | Sox-17    | 1840 (-) | 1     | 1     | gAACAA               |
| I\$BRCZ3_01    | BR-C      | 1840 (+) | 1     | 0.97  | gaacaAACTAaaaga      |
| V\$SOX4_Q5     | Sox-4     | 1841 (+) | 1     | 1     | AACAAa               |
| V\$CDX_Q5      | Cdx       | 1841 (+) | 1     | 0.913 | aacaaactaaaagATAAA   |
| V\$GATA1_11    | Gata1     | 1850 (-) | 1     | 0.927 | aaaGATAAaga          |
| V\$GATA3_Q4    | GATA-3    | 1852 (+) | 1     | 1     | AGATAa               |
| V\$GATA4_Q5_01 | GATA-4    | 1852 (+) | 1     | 1     | AGATAaa              |
| V\$TFAP2C_05   | AP-2gamma | 1857 (+) | 0.93  | 0.95  | aagACCTGaggctg       |

|                 |                   |          |       |       |                    |
|-----------------|-------------------|----------|-------|-------|--------------------|
| V\$MYB_10       | c-Myb             | 1863 (+) | 0.967 | 0.963 | tgaggCTGTTga       |
| V\$HNF3B_05     | HNF-3beta         | 1866 (+) | 0.932 | 0.938 | ggctgTTGACact      |
| V\$TBX20_07     | Tbx20             | 1866 (+) | 1     | 0.906 | ggctgtTGACAActc    |
| V\$FOXO1_03     | FOXO1             | 1869 (+) | 1     | 1     | TGTTGac            |
| V\$HNF3A_03     | HNF-3alpha        | 1869 (+) | 0.937 | 0.951 | tgTTGACact         |
| V\$MEIS1DRGX_01 | meis1:Prrx1l1     | 1872 (+) | 1     | 0.921 | TGACAActcatag      |
| V\$TCF1_10      | TCF-1             | 1884 (-) | 1     | 0.947 | ctttcCTTTGctttac   |
| V\$LEF1_09      | LEF-1             | 1887 (+) | 1     | 0.959 | tcCTTTGctttact     |
| P\$CBNAC_01     | CBNAC             | 1891 (+) | 1     | 1     | tTGCTT             |
| V\$EFC_Q6       | RFX1              | 1894 (+) | 0.82  | 0.89  | cTTTACtggcaaa      |
| V\$NFATC1_03    | NFATc1            | 1894 (+) | 0.883 | 0.764 | ctttactTGGCAaa     |
| V\$NF1A_Q6_01   | NF-1A             | 1899 (-) | 1     | 1     | cTTGGCa            |
| V\$HNF1_Q6      | HNF-1             | 1905 (-) | 1     | 0.9   | aaagattaggATTAacct |
| V\$GTF2IRD1_01  | GTF2IRD1-isoform2 | 1906 (+) | 1     | 0.936 | aaGATTAgg          |
| V\$PITX1_01     | Pitx1             | 1907 (+) | 1     | 0.934 | agattaGGATTAacctc  |
| V\$CRX_02       | Crx               | 1907 (+) | 1     | 0.93  | agattagGATTAacct   |
| V\$CRX_Q4_01    | CRX               | 1908 (-) | 1     | 1     | GATTAg             |
| V\$PITX2_01     | PITX2             | 1908 (+) | 1     | 0.95  | gattagGATTAacctct  |
| V\$HNF1B_Q6_01  | HNF-1beta         | 1908 (+) | 1     | 0.908 | gattaggaTTAACc     |
| V\$DMBX1_02     | DMBX1             | 1911 (+) | 1     | 0.997 | tagGATTAac         |
| V\$DPRX_01      | DPRX              | 1911 (+) | 1     | 0.997 | tagGATTAac         |
| V\$OTX1_06      | Otx1              | 1912 (-) | 1     | 0.999 | agGATTAa           |
| V\$PITX1_Q6     | PITX1             | 1913 (-) | 1     | 0.943 | gGATTAacctc        |
| I\$GSC_01       | Gsc               | 1913 (-) | 1     | 1     | gGATTA             |
| I\$PTX1_01      | Ptx1              | 1913 (-) | 1     | 1     | gGATTAa            |
| I\$BCD_02       | bcd               | 1913 (-) | 1     | 1     | gGATTA             |
| I\$OC_01        | oc                | 1913 (-) | 1     | 1     | gGATTA             |
| I\$BCD_04       | BCD               | 1913 (-) | 1     | 1     | gGATTAa            |
| V\$CRX_Q4_01    | CRX               | 1914 (-) | 1     | 1     | GATTAa             |
| V\$PRDM16_04    | MEL1              | 1926 (-) | 1     | 1     | cTCATC             |
| V\$TEF_08       | TEF1              | 1928 (-) | 0.923 | 0.915 | catcctttgcATACC    |
| V\$OCT1_05      | 1-Oct             | 1929 (+) | 1     | 0.905 | atccTTTGatacc      |
| V\$OCT1_Q6      | 1-Oct             | 1929 (-) | 1     | 0.943 | atccTTTGatacc      |



|                   |                     |          |       |       |                           |
|-------------------|---------------------|----------|-------|-------|---------------------------|
| V\$OCT_C          | OCT-x               | 1929 (+) | 1     | 0.925 | atccTTTGCatac             |
| V\$OCT_Q6         | Octamer             | 1930 (+) | 1     | 0.957 | tccttTGCATa               |
| V\$OCT2_Q6        | 2-Oct               | 1930 (-) | 1     | 0.947 | tccttTGCATacct            |
| V\$OCT1_B         | 1-Oct               | 1931 (-) | 1     | 0.953 | ccttTGCATa                |
| V\$OCT2_Q4        | 2-Oct               | 1931 (-) | 1     | 0.956 | ccttTGCATac               |
| V\$POU2F2_Q5      | Pou2f2              | 1932 (-) | 1     | 0.911 | ctttGCATA                 |
| I\$VVL_Q1         | vvl                 | 1935 (-) | 1     | 1     | TGCATa                    |
| P\$LBD23_Q1       | LBD23               | 1935 (+) | 0.986 | 0.799 | tgcatacctCTCGct           |
| V\$IRF4_Q4        | IRF4                | 1938 (+) | 1     | 0.91  | ataccTCTCGctcag           |
| V\$IRF6_Q4        | IRF6                | 1938 (+) | 1     | 0.922 | ataccTCTCGctcag           |
| F\$HSF_Q1         | HSF                 | 1951 (+) | 1     | 1     | AGAAC                     |
| V\$EOMES_Q4       | EOMES               | 1954 (-) | 1     | 0.959 | acctcaaCACCTcttt          |
| V\$TBX5_Q1        | Tbx5                | 1956 (-) | 1     | 0.972 | ctcaACACCTct              |
| V\$TBX5_Q2        | Tbx5                | 1958 (-) | 1     | 0.975 | caACACCTct                |
| P\$BPC1_Q2        | BPC1                | 1966 (-) | 1     | 1     | cTTTCT                    |
| V\$SPIB_Q3        | Spi-B               | 1968 (+) | 1     | 1     | TTCTCc                    |
| V\$ZNF35_Q4       | ZNF35               | 1976 (+) | 1     | 1     | gCAAGA                    |
| V\$SRY_Q12        | SRY                 | 1979 (-) | 1     | 0.986 | agATTGTt                  |
| V\$CUX1TBX21_Q1   | CDP:T-bet           | 1980 (-) | 0.797 | 0.802 | gaTTGTTcttagtgcct         |
| V\$GR_Q6          | GR                  | 1981 (+) | 0.989 | 0.956 | attgttcttagTGTCctg        |
| V\$SOX17_Q2       | Sox-17              | 1982 (+) | 1     | 1     | TTGTTc                    |
| F\$HSF_Q1         | HSF                 | 1984 (-) | 1     | 1     | GTTCT                     |
| V\$AR_Q10         | AR                  | 1984 (-) | 0.977 | 0.933 | gttcttagTGTCctt           |
| V\$DR3_Q4         | VDR,                | 1990 (+) | 0.775 | 0.835 | agtgtcctggTAGCCcagtg      |
| V\$REVERBALPHA_Q3 | Rev-ErbAalpha       | 1996 (-) | 0.995 | 0.913 | cttgtagCCCAGtgtccc        |
| I\$LAG1_Q1        | Lag1                | 1997 (-) | 1     | 1     | ttGGTAG                   |
| V\$PPARG_Q2       | PPARGgamma:RXRalpha | 1998 (+) | 0.627 | 0.692 | tggttaGCCCAgtgtcccctggtt  |
| F\$STP4_Q2        | Stp4p               | 1999 (+) | 0.8   | 0.815 | ggTAGCCca                 |
| V\$THAP1_Q1       | Thap1               | 2008 (-) | 1     | 0.864 | gtgtcccctgggttaaaaATGGCct |
| V\$ZXL_Q2         | ZXL                 | 2010 (-) | 1     | 1     | gTCCCT                    |
| V\$CTCF_Q6        | CTCF                | 2010 (-) | 1     | 0.887 | gtcccCTGGT                |
| V\$YY1_Q7         | YY1                 | 2011 (-) | 1     | 0.869 | tcccctgggttaaaaATGGCctt   |
| V\$AMEF2_Q6       | aMEF-2              | 2015 (+) | 1     | 0.917 | ctggtTAAAAatggcctt        |

|                  |                  |          |       |       |                        |
|------------------|------------------|----------|-------|-------|------------------------|
| V\$MMEF2_Q6      | MEF-2A           | 2015 (+) | 1     | 0.968 | ctggtTAAAAatggcc       |
| V\$YY1_Q4_01     | YY1              | 2018 (+) | 1     | 0.99  | gttaaaAATGGcctt        |
| V\$YY1_Q6        | YY1              | 2021 (-) | 1     | 0.994 | aaaaATGGC              |
| V\$YY1_03        | YY1              | 2021 (-) | 1     | 0.875 | aaaaATGGCctt           |
| V\$YY1_12        | YY1              | 2021 (+) | 1     | 0.935 | aaaaATGGCctt           |
| V\$YY1_13        | YY1              | 2021 (+) | 1     | 0.97  | aaaaATGGCctta          |
| V\$YY1_14        | YY1              | 2021 (+) | 1     | 0.883 | aaaaATGGCctt           |
| V\$YY1_Q6_03     | YY1              | 2022 (-) | 1     | 1     | aaAATGG                |
| V\$YY1_Q6_02     | YY1              | 2022 (-) | 1     | 0.983 | aaaATGGCctt            |
| V\$TEAD4CEBPD_01 | TEF-3:C/EBPdelta | 2022 (+) | 0.777 | 0.807 | aaaatggccTTAGGgaaa     |
| V\$TFAP2A_10     | TFAP2A           | 2024 (+) | 0.912 | 0.932 | aatggccttAGGGAA        |
| V\$AP2ALPHA_02   | AP-2alphaA       | 2025 (+) | 0.979 | 0.967 | atGGCCTtagggaaa        |
| V\$NURR1_Q3      | NURR1            | 2026 (+) | 1     | 1     | tgGCCTT                |
| V\$HELIOSA_01    | Helios           | 2030 (+) | 1     | 0.991 | cttAGGGAaag            |
| V\$TEAD4CEBPD_01 | TEF-3:C/EBPdelta | 2035 (+) | 1     | 0.87  | ggaaagaatTTGCGgaaa     |
| P\$DEL2_02       | DEL2             | 2035 (+) | 0.825 | 0.729 | ggaaagaattTGCGGaaaag   |
| V\$ETV2CEBPD_01  | ER71:C/EBPdelta  | 2036 (+) | 0.946 | 0.804 | gaaaGAATTtgcggaaa      |
| V\$FLI1CEBPD_01  | Fli-1:C/EBPdelta | 2036 (+) | 0.877 | 0.793 | gaaaGAATTtgcggaaa      |
| V\$ERFCEBPD_01   | ERF:C/EBPdelta   | 2036 (+) | 1     | 0.83  | gaaagaatTTGCGgaaa      |
| V\$FLI1CEBPB_01  | Fli-1:C/EBPbeta  | 2036 (+) | 1     | 0.782 | gaaagaatTTGCGgaaa      |
| V\$ETV5CEBPD_01  | Erm:C/EBPdelta   | 2036 (+) | 1     | 0.789 | gaaagaatTTGCGgaaa      |
| V\$POU2F1ELK1_01 | POU2F1:Elk-1     | 2038 (-) | 0.788 | 0.779 | aagAATTTgcgga          |
| F\$YBR239C_01    | Ybr239c          | 2038 (+) | 0.796 | 0.82  | aagaattTGCGGaaaagatg   |
| F\$PDR1_01       | Pdr1p            | 2038 (+) | 0.86  | 0.879 | aagaattTGCGGaaaagatg   |
| F\$YBR239C_01    | Ybr239c          | 2038 (-) | 0.796 | 0.809 | aagaattTGCGGaaaagatg   |
| V\$TEAD4FLI1_01  | TEF-3:Fli-1      | 2039 (-) | 0.883 | 0.816 | agaATTTGcgga           |
| V\$E2F3DRGX_01   | E2F-3:Prrx1l     | 2039 (-) | 0.864 | 0.806 | agaATTTGcgga           |
| V\$ZNF236_02     | ZNF236           | 2039 (+) | 1     | 0.982 | agaatTTGCGga           |
| V\$SFPI1_04      | SFPI1            | 2040 (+) | 0.953 | 0.934 | gaatttgcGAAAa          |
| V\$SP100_03      | Sp100            | 2041 (-) | 0.958 | 0.955 | aatTTGCGgaaaag         |
| P\$AT4G27900_01  | AT4G27900        | 2041 (+) | 0.693 | 0.748 | aattTGCGGaaaagatggctat |
| V\$SP100_03      | Sp100            | 2041 (+) | 1     | 0.967 | aatttgcGAAAaag         |
| P\$DEL1_02       | DEL1             | 2041 (-) | 0.805 | 0.739 | aatttgcGAAAaagatggcta  |

|                   |                 |          |       |       |                        |
|-------------------|-----------------|----------|-------|-------|------------------------|
| V\$YY1_07         | YY1             | 2041 (-) | 1     | 0.843 | aatttgcggaaaagATGGCtat |
| V\$E2F1_Q4        | E2F-1           | 2042 (+) | 0.919 | 0.941 | aTTTGCgg               |
| V\$CEBPB_08       | C/EBPBETA       | 2042 (+) | 1     | 0.905 | atTTGCGgaaa            |
| V\$CEBPB_03       | CEBPB           | 2043 (-) | 1     | 0.907 | tTTGCGgaaa             |
| V\$CEBPD_01       | CEBPD           | 2043 (-) | 1     | 0.92  | tTTGCGgaaa             |
| V\$CEBPE_02       | CEBPE           | 2043 (-) | 1     | 0.927 | tTTGCGgaaa             |
| V\$CEBPA_04       | C/EBPalpha      | 2043 (+) | 1     | 0.905 | tTTGCGgaaa             |
| V\$CEBPB_07       | C/EBPbeta       | 2043 (+) | 1     | 0.91  | tTTGCGgaaa             |
| V\$TEAD4CEBPB_01  | TEF-3:C/EBPbeta | 2043 (+) | 1     | 0.805 | tTTGCGgaaaagatggctatct |
| F\$PDR3_02        | PDR3            | 2043 (-) | 1     | 0.75  | tttGCGGA               |
| V\$CEBPB_08       | C/EBPBETA       | 2043 (-) | 0.926 | 0.898 | tttgCGGAAaa            |
| F\$YBR239C_02     | Ybr239c         | 2045 (+) | 1     | 0.935 | tgCGGAAa               |
| V\$ELK1ONECUT2_01 | Elk-1:OC-2      | 2045 (+) | 1     | 0.788 | tgCGGAAaagatggctat     |
| V\$YY1_02         | YY1             | 2045 (-) | 1     | 0.874 | tgcggaaaagATGGCtatct   |
| V\$E2F1DP1_01     | E2F-1:DP-1      | 2046 (-) | 0.887 | 0.918 | gCGGAAaa               |
| V\$E2F1DP2_01     | E2F-1:DP-2      | 2046 (-) | 0.902 | 0.937 | gCGGAAaa               |
| V\$E2F4DP1_01     | E2F-4:DP-1      | 2046 (-) | 0.79  | 0.869 | gCGGAAaa               |
| V\$E2F1DP1RB_01   | Rb:E2F-1:DP-1   | 2046 (-) | 0.79  | 0.863 | gCGGAAaa               |
| V\$SPIB_Q3        | Spi-B           | 2046 (-) | 1     | 1     | gCGGAA                 |
| V\$E2F_02         | E2F             | 2046 (-) | 0.816 | 0.893 | gcgGAAAA               |
| V\$NFAT1_Q6       | NFATc2          | 2048 (+) | 1     | 1     | GGAAAA                 |
| V\$NFAT4_Q3       | NFATc3          | 2048 (+) | 1     | 1     | GGAAAA                 |
| V\$NFAT1_Q4       | NFATc2          | 2048 (+) | 1     | 1     | GGAAAA                 |
| V\$YY1_Q4_01      | YY1             | 2048 (+) | 0.996 | 0.987 | ggaaaaGATGGctat        |
| V\$YY1_Q6         | YY1             | 2051 (-) | 1     | 0.996 | aaagATGGC              |
| V\$YY1_12         | YY1             | 2051 (+) | 1     | 0.939 | aaagATGGCtat           |
| V\$YY1_13         | YY1             | 2051 (+) | 1     | 0.965 | aaagATGGCtatc          |
| V\$YY1_14         | YY1             | 2051 (+) | 1     | 0.893 | aaagATGGCtat           |
| V\$YY1_Q6_02      | YY1             | 2052 (-) | 1     | 0.986 | aagATGGCtat            |
| V\$GATA2_01       | GATA-2          | 2057 (-) | 1     | 0.996 | ggCTATCtga             |
| V\$GATA5_Q4       | GATA-5          | 2060 (+) | 1     | 1     | TATCTg                 |
| V\$SPIB_Q3        | Spi-B           | 2065 (-) | 1     | 1     | gAAGAA                 |
| V\$PRDM16_05      | MEL1            | 2068 (+) | 1     | 1     | GAAGAt                 |

|                 |           |          |       |       |                   |
|-----------------|-----------|----------|-------|-------|-------------------|
| V\$FOS_09       | C-FOS     | 2068 (+) | 0.877 | 0.84  | gaagaTGACCacatctc |
| V\$ESR1_05      | ER-alpha  | 2069 (+) | 1     | 0.973 | aagaTGACC         |
| V\$MEQCJUN_02   | MEQ:c-Jun | 2072 (-) | 0.717 | 0.837 | atGACCacatc       |
| V\$PEBP2B_Q6    | PEBP2beta | 2074 (-) | 1     | 1     | gaCCACA           |
| V\$AML1_01      | AML1a     | 2075 (-) | 1     | 1     | ACCACa            |
| V\$AML1_Q6      | AML1      | 2075 (-) | 1     | 1     | aCCACA            |
| V\$AML1_Q5      | AML1      | 2075 (-) | 1     | 1     | aCCACA            |
| V\$HLTF_Q4      | HLTF      | 2078 (-) | 1     | 0.939 | acatctccTTTTTggct |
| P\$PBF_Q2       | PBF       | 2084 (-) | 1     | 1     | CCTTTt            |
| P\$PBF_Q2_01    | PBF       | 2084 (+) | 1     | 1     | CCTTTt            |
| P\$HSFA2_01     | HSFA2     | 2087 (-) | 1     | 1     | tTTTGG            |
| V\$SOX12_04     | Sox-12    | 2089 (-) | 1     | 0.921 | tggcTTTGTctattc   |
| V\$TCF1_Q5      | TCF-1     | 2093 (+) | 1     | 1     | CTTTGt            |
| V\$SOX10_Q6     | Sox-10    | 2093 (+) | 1     | 1     | cTTTGTc           |
| V\$SOX10_01     | Sox-10    | 2093 (+) | 1     | 1     | cTTTGT            |
| I\$CT_01        | ct        | 2106 (-) | 1     | 1     | GTTCAa            |
| V\$NFAT2_Q5_01  | NFATc1    | 2124 (+) | 1     | 0.999 | tgattTTTCCa       |
| V\$ZNF721_03    | ZNF721    | 2125 (-) | 1     | 1     | gaTTTTTtcc        |
| V\$CIZ_01       | CIZ       | 2125 (-) | 1     | 1     | gatTTTTTc         |
| V\$NFAT4_Q5     | NFATc3    | 2127 (-) | 1     | 1     | tttTTTCCa         |
| V\$POU2F1_04    | POU2F1    | 2127 (-) | 0.997 | 0.935 | ttttTCCATagggtt   |
| V\$POU2F1_05    | POU2F1    | 2127 (-) | 0.997 | 0.935 | ttttTCCATagggtt   |
| P\$AT3G51080_01 | AT3G51080 | 2128 (-) | 1     | 1     | ttTTTCC           |
| V\$NFAT_Q3      | NFAT      | 2128 (-) | 1     | 1     | ttTTTCCat         |
| V\$NFATC1_04    | NFATC1    | 2128 (+) | 1     | 0.998 | ttTTTCCata        |
| V\$NFATC3_01    | NFATC3    | 2128 (+) | 1     | 0.996 | ttTTTCCata        |
| V\$NFAT1_Q6     | NFATc2    | 2129 (-) | 1     | 1     | tTTTCC            |
| V\$NFAT4_Q3     | NFATc3    | 2129 (-) | 1     | 1     | tTTTCC            |
| V\$NFATC2_01    | NFATc2    | 2129 (+) | 1     | 1     | tTTTCCa           |
| V\$NFAT1_Q4     | NFATc2    | 2129 (-) | 1     | 1     | tTTTCC            |
| P\$GATA8_01     | GATA8     | 2146 (+) | 1     | 0.999 | caGATCTgg         |
| V\$ZNF644_01    | ZNF644    | 2160 (+) | 1     | 0.941 | gcCTGCCactct      |
| V\$PBX2_01      | PBX2      | 2161 (-) | 0.932 | 0.925 | cCTGCCactct       |

|                |             |          |       |       |                       |
|----------------|-------------|----------|-------|-------|-----------------------|
| V\$CTCF_08     | CTCF        | 2162 (-) | 1     | 0.889 | cTGCCActcttgg         |
| F\$TBF1_01     | Tbf1p       | 2169 (-) | 1     | 0.988 | tcttggTAGGGttaagttt   |
| P\$MYB1L_01    | MYB1-like   | 2173 (-) | 1     | 0.999 | ggTAGGGtt             |
| F\$TBF1_04     | Tbf1p       | 2175 (-) | 1     | 1     | tTAGGGtt              |
| V\$ZNF511_01   | ZNF511      | 2188 (+) | 1     | 0.942 | tgaagaGGCAGtg         |
| P\$MYB118_01   | MYB118      | 2197 (-) | 1     | 0.847 | agtGTAACagtgagtg      |
| I\$ARA_01      | ara         | 2201 (+) | 1     | 1     | TAACA                 |
| I\$CAUP_01     | caup        | 2201 (+) | 1     | 1     | TAACA                 |
| V\$NKX25_09    | CSX         | 2205 (+) | 1     | 0.995 | agtgGAGTGg            |
| V\$TTF1_04     | TTF-1       | 2206 (+) | 1     | 0.978 | gtgGAGTGgc            |
| V\$NKX22_05    | NKX2B       | 2206 (+) | 1     | 0.995 | gtgGAGTGgca           |
| V\$PBX2_01     | PBX2        | 2208 (+) | 0.932 | 0.925 | ggagtGGCAGg           |
| V\$ZNF644_01   | ZNF644      | 2208 (-) | 1     | 0.976 | ggagtGGCAGga          |
| F\$MET28_01    | MET28       | 2237 (+) | 1     | 1     | CTGTGg                |
| V\$RXRA_16     | RXRALPHA    | 2237 (+) | 0.984 | 0.97  | ctgTGGCCtttag         |
| V\$NURR1_Q3    | NURR1       | 2240 (+) | 1     | 1     | tgGCCTT               |
| V\$E2F1HES7_02 | E2F-1:HES-7 | 2247 (-) | 0.759 | 0.738 | tagagccagactgCCCGAgta |
| V\$SMAD5_Q5_01 | SMAD5       | 2253 (+) | 1     | 0.999 | CAGACTgc              |
| F\$FLP1_01     | Flp         | 2254 (-) | 1     | 1     | agACTGC               |
| F\$LEU3_02     | Leu3p       | 2261 (-) | 0.871 | 0.913 | CCGAGtaagg            |
| V\$VMAF_01     | v-Maf       | 2277 (-) | 0.91  | 0.867 | gccttcttggTCATCaatt   |
| P\$NAC078_01   | NAC078      | 2282 (+) | 0.709 | 0.8   | ctggatcatCAATTtac     |
| V\$CDP_02      | CDP         | 2283 (-) | 0.93  | 0.91  | tgggtcaTCAATtta       |
| V\$CLOX_01     | Clox        | 2283 (-) | 0.941 | 0.896 | tgggtcaTCAATtta       |
| V\$CDPCR3HD_01 | CDP         | 2286 (-) | 0.996 | 0.964 | gtcATCAAtt            |
| I\$PRD_03      | Prd         | 2287 (+) | 0.993 | 0.928 | tcATCAAtt             |
| V\$CUX1_07     | CDP         | 2287 (+) | 0.97  | 0.936 | tcaTCAATtt            |
| I\$ABDA_Q6     | Abd-A       | 2289 (-) | 1     | 0.994 | atcaATTTAc            |
| V\$CUX1_05     | CDP         | 2289 (+) | 0.696 | 0.845 | atcaatttacttATCTGt    |
| V\$FOXA1_02    | HNF-3alpha  | 2293 (-) | 1     | 0.954 | aTTTACtta             |
| V\$GATA6_04    | GATA-6      | 2293 (-) | 1     | 0.972 | atttacTTATCgtgaa      |
| V\$GATA2_09    | GATA2       | 2293 (+) | 1     | 0.971 | atttacTTATCgt         |
| V\$GATA_C      | GATA-X      | 2294 (-) | 1     | 0.992 | tttacTTATCt           |

|                 |            |          |       |       |                        |
|-----------------|------------|----------|-------|-------|------------------------|
| V\$GATA6_08     | GATA-6     | 2294 (-) | 1     | 0.953 | tttacTTATCtgt          |
| V\$GATA6_10     | GATA-6     | 2294 (-) | 1     | 0.969 | tttacTTATCtgt          |
| V\$GATA1_Q6     | GATA-1     | 2295 (-) | 1     | 0.998 | ttacTTATCtgtgaa        |
| V\$GATA6_09     | GATA6      | 2295 (-) | 1     | 0.961 | ttacTTATCtgtg          |
| V\$GATA1_04     | GATA-1     | 2295 (-) | 1     | 0.988 | ttactTATCTgtg          |
| V\$GATA1_11     | Gata1      | 2296 (+) | 1     | 0.986 | tacTTATCtgt            |
| V\$GATA2_10     | GATA-2     | 2296 (-) | 1     | 0.987 | tacTTATCtgt            |
| V\$GATA1_14     | GATA-1     | 2296 (-) | 1     | 0.992 | tacTTATCtgt            |
| V\$GATA2_11     | GATA-2     | 2296 (-) | 1     | 0.99  | tacTTATCtgt            |
| V\$SMARCC2_02   | BAF170     | 2296 (+) | 1     | 0.988 | tacTTATCtgt            |
| V\$GATA1_16     | GATA-1     | 2296 (-) | 1     | 0.943 | tacTTATCtgtgaaatggg    |
| V\$GATA2_14     | GATA-2     | 2296 (-) | 1     | 0.985 | tactTATCTgt            |
| V\$GATA2_02     | GATA-2     | 2297 (-) | 1     | 0.986 | acTTATCtgt             |
| V\$GATA3_07     | GATA3      | 2297 (-) | 1     | 0.996 | acTTATCt               |
| V\$GATA1_10     | GATA-1     | 2297 (+) | 1     | 0.978 | acTTATCtg              |
| V\$GATA4_03     | GATA-4     | 2297 (+) | 1     | 0.973 | acTTATCtgtg            |
| V\$GATA3_11     | GATA-3     | 2297 (-) | 1     | 0.991 | acTTATCt               |
| V\$GATA1_13     | GATA-1     | 2297 (-) | 1     | 0.934 | acTTATCtgtgaaatgggc    |
| V\$GATA4_05     | GATA-4     | 2297 (-) | 1     | 0.974 | acTTATCtgt             |
| V\$GATA6_11     | GATA-6     | 2297 (-) | 1     | 0.983 | acTTATCtgt             |
| V\$GATA3_10     | GATA3      | 2297 (-) | 1     | 0.97  | actTATCT               |
| V\$GATA_Q6      | GATA       | 2298 (-) | 1     | 1     | cTTATCt                |
| V\$GATA6_Q5     | GATA-6     | 2298 (-) | 1     | 1     | cTTATCt                |
| V\$GATA1_12     | GATA-1     | 2298 (-) | 1     | 1     | cTTATCt                |
| V\$GATA3_12     | GATA-3     | 2298 (+) | 1     | 1     | cTTATC                 |
| V\$GATA3_Q4     | GATA-3     | 2299 (-) | 1     | 1     | tTATCT                 |
| V\$GATA5_Q4     | GATA-5     | 2300 (+) | 1     | 1     | TATCTg                 |
| V\$CEBPG_Q6     | C/EBPgamma | 2302 (-) | 1     | 0.896 | tctgtGAAATggg          |
| V\$ZBTB44_01    | Zbtb44     | 2303 (+) | 1     | 1     | CTGTGa                 |
| V\$SNAP190_02   | SNAP190    | 2309 (-) | 0.928 | 0.94  | AATGGgca               |
| P\$AT4G27900_01 | AT4G27900  | 2311 (-) | 0.769 | 0.714 | tgggcaaccataaTCGTTcatg |
| P\$MYB3R5_01    | MYB3R5     | 2315 (+) | 0.821 | 0.785 | caaccataaTCGTTc        |
| P\$MYB3R1_01    | MYB3R1     | 2316 (+) | 0.845 | 0.807 | aaccataaTCGTTca        |

|                 |              |          |       |       |                     |
|-----------------|--------------|----------|-------|-------|---------------------|
| P\$MYB3R4_01    | MYB3R4       | 2316 (+) | 0.83  | 0.802 | aaccataaTCGTTca     |
| V\$CDP_01       | CDP          | 2317 (+) | 0.818 | 0.785 | aCCATAatcggt        |
| V\$CDPCR3_01    | CDP          | 2318 (-) | 1     | 0.843 | CCATAatcggtcatg     |
| V\$ZNF333_01    | ZNF333       | 2320 (+) | 1     | 1     | ATAAT               |
| V\$PAX2_01      | Pax-2        | 2320 (-) | 0.991 | 0.895 | ataatcggtcATGACTgca |
| I\$EVE_Q6       | Eve          | 2328 (+) | 0.982 | 0.926 | tcatgACTGC          |
| V\$ARID5A_03    | Arid5a       | 2336 (+) | 1     | 0.989 | gcAATATtgaagc       |
| V\$OC2_Q3       | OC-2         | 2340 (-) | 1     | 1     | tATTGA              |
| V\$TCF4_Q5      | TCF-4        | 2348 (+) | 1     | 0.992 | gCTTTGaa            |
| V\$LEF1_Q2      | TCF-7        | 2349 (-) | 1     | 1     | CTTTGa              |
| V\$TCF3_Q6      | TCF-3        | 2349 (+) | 1     | 1     | CTTTGa              |
| V\$IRF8_Q6      | IRF-8        | 2352 (-) | 1     | 1     | tGAAAct             |
| V\$ZNF835_02    | ZNF835       | 2356 (+) | 1     | 1     | actAAGATt           |
| P\$MYB118_01    | MYB118       | 2366 (-) | 1     | 0.815 | ttaGTAACtcacttgag   |
| V\$ERFSREBF2_02 | ERF:SREBP-2  | 2366 (+) | 0.85  | 0.751 | ttagtaactcACTTGag   |
| V\$DEC_Q1       | DEC          | 2371 (-) | 1     | 0.936 | aactcACTTGagg       |
| V\$NKX25_Q6     | CSX          | 2373 (+) | 1     | 0.992 | ctCACTTgagg         |
| V\$NKX25_01     | Nkx2-5       | 2375 (-) | 1     | 1     | CACTTga             |
| V\$NKX2B_Q3     | NKX2B        | 2375 (+) | 1     | 1     | CACTTga             |
| I\$TIN_01       | tin          | 2375 (-) | 1     | 1     | CACTTgag            |
| V\$TRP53_01     | Trp53        | 2376 (-) | 0.977 | 0.918 | acttgaggcaacaCCTGT  |
| V\$EOMES_04     | EOMES        | 2380 (-) | 1     | 0.975 | gaggcaaCACCTgtcc    |
| V\$RFX_Q6       | RFX          | 2381 (-) | 1     | 0.982 | agGCAACac           |
| V\$TALLIKE_Q6   | Tal          | 2382 (+) | 1     | 0.981 | ggcaaCACCTgt        |
| V\$E47_02       | E47          | 2382 (-) | 1     | 0.979 | ggcaacACCTGtctg     |
| V\$GRE_C        | GR           | 2382 (+) | 0.978 | 0.862 | ggcaacacctGTCCtG    |
| N\$HLH2HLH14_01 | hlh-2:hlh-14 | 2383 (+) | 1     | 0.998 | gcaacACCTGtctga     |
| V\$TBX5_02      | Tbx5         | 2384 (-) | 1     | 0.975 | caACACctgt          |
| V\$MYOD_01      | MyoD         | 2384 (-) | 1     | 1     | caacACCTGtcc        |
| V\$DEC1_Q3      | 1-Dec        | 2384 (+) | 0.966 | 0.941 | caacACCTGtcc        |
| V\$FIGLA_01     | FIGLA        | 2385 (+) | 1     | 0.997 | aaCACCTgtc          |
| V\$ID4_01       | ID4          | 2385 (+) | 1     | 0.999 | aaCACCTgtc          |
| V\$MESP1_01     | MESP1        | 2385 (+) | 1     | 1     | aaCACCTgtc          |

|                  |                     |          |       |       |                       |
|------------------|---------------------|----------|-------|-------|-----------------------|
| V\$ITF2_01       | ITF-2               | 2385 (+) | 1     | 0.999 | aaCACCTgtc            |
| V\$SNAI2_01      | slug                | 2386 (-) | 1     | 1     | acACCTGtc             |
| V\$E2A_Q6        | E2A                 | 2387 (+) | 1     | 1     | CACCTgtc              |
| F\$YDR520C_01    | Ydr520c             | 2389 (+) | 0.786 | 0.775 | cctgctCTGAGttaatctga  |
| V\$NR1H3RXRA_01  | LXR-alpha:RXR-alpha | 2391 (+) | 0.962 | 0.827 | TGTCCtgagttaatctgaa   |
| V\$CRX_Q4_01     | CRX                 | 2400 (+) | 1     | 1     | tTAATC                |
| V\$PRX2_Q2       | Prx2                | 2400 (-) | 0.98  | 0.985 | ttaaTCTGA             |
| V\$IRF8_Q6       | IRF-8               | 2406 (-) | 1     | 1     | tGAAACt               |
| P\$REM16_01      | REM16               | 2406 (+) | 1     | 0.749 | tgaaactgtttggaaGGAAAa |
| P\$DEL2_02       | DEL2                | 2407 (+) | 0.611 | 0.792 | gaaactgtttGGAAGgaaaa  |
| I\$MIRR_01       | mirr                | 2412 (-) | 1     | 1     | TGTTT                 |
| P\$DEL1_02       | DEL1                | 2413 (-) | 0.591 | 0.762 | gtttggAAGGAaaactgaca  |
| V\$NFAT1_Q6      | NFATc2              | 2421 (+) | 1     | 1     | GGAAAa                |
| V\$NFAT4_Q3      | NFATc3              | 2421 (+) | 1     | 1     | GGAAAa                |
| V\$NFAT1_Q4      | NFATc2              | 2421 (+) | 1     | 1     | GGAAAa                |
| V\$TITF1_Q3      | TTF1                | 2424 (-) | 1     | 0.926 | aaaCTTGAcA            |
| P\$WRKY18_Q2     | WRKY18              | 2424 (-) | 1     | 1     | aaacTTGAC             |
| F\$MATALPHA2_01  | MATalpha2p          | 2427 (-) | 1     | 0.984 | ctgACATGa             |
| P\$O2_Q4         | Opaque-2            | 2429 (-) | 1     | 0.984 | tgACATGaaac           |
| F\$STE12_Q4      | Ste12p              | 2433 (+) | 1     | 1     | aTGAAAc               |
| V\$IRF8_Q6       | IRF-8               | 2434 (-) | 1     | 1     | tGAAACt               |
| V\$NKX22_01      | Nkx2-2              | 2437 (-) | 1     | 0.968 | aactACTTAt            |
| I\$EMS_02        | Ems                 | 2439 (+) | 0.917 | 0.94  | ctACTTAt              |
| V\$CUX1_04       | Cux1                | 2440 (+) | 0.987 | 0.94  | tacttATAATcatta       |
| V\$CUX1_04       | Cux1                | 2440 (-) | 0.969 | 0.934 | tacttATAATcatta       |
| V\$SATB1_Q3      | SATB1               | 2444 (-) | 1     | 0.956 | tataatCATTAttat       |
| V\$ZNF333_01     | ZNF333              | 2445 (+) | 1     | 1     | ATAAT                 |
| V\$PMX1_Q6       | PMX1                | 2446 (+) | 1     | 1     | TAATCa                |
| V\$FOXM1_Q3      | FOXM1               | 2446 (-) | 0.906 | 0.937 | taatCATTAtt           |
| V\$CUX1HOXB13_01 | CDP:HOXB13          | 2447 (-) | 0.71  | 0.824 | aaTCATTatttattcc      |
| I\$DFD_03        | Dfd                 | 2447 (+) | 1     | 0.986 | aatCATTAtt            |
| V\$POU2F1GSC2_01 | POU2F1:Gscl         | 2448 (+) | 0.958 | 0.895 | atCATTAttattccattt    |
| V\$POU3F3_04     | POU3F3              | 2448 (-) | 0.999 | 0.979 | atcaTTATTtat          |



|                |              |          |       |       |                      |
|----------------|--------------|----------|-------|-------|----------------------|
| V\$POU6F1_01   | POU6F1       | 2449 (+) | 1     | 0.885 | tcattaTTTAT          |
| V\$ZNF333_01   | ZNF333       | 2451 (-) | 1     | 1     | ATTAT                |
| V\$MEF2C_Q4    | MEF-2C       | 2453 (+) | 1     | 1     | TATTTat              |
| V\$SATB1_Q5_01 | SATB1        | 2454 (+) | 1     | 1     | aTTTAT               |
| V\$CDX1_Q5     | Cdx-1        | 2455 (+) | 1     | 1     | TTTATt               |
| V\$YY1_01      | YY1          | 2456 (+) | 1     | 0.984 | ttatTCCATttttaaa     |
| P\$MADSA_Q2    | MADS-A       | 2458 (-) | 1     | 0.967 | attccATTTTttaa       |
| V\$YY1_Q6_03   | YY1          | 2461 (+) | 1     | 1     | CCATTt               |
| V\$ARID5A_03   | Arid5a       | 2465 (-) | 1     | 0.986 | ttttaaATATTg         |
| V\$FOXJ2_02    | FOXJ2        | 2468 (-) | 0.839 | 0.864 | ttaaATTAGtgc         |
| V\$HMG1Y_Q3    | HMG1Y        | 2477 (+) | 0.96  | 0.955 | agtgATTTTgttg        |
| V\$BRN1_Q6     | BRN1         | 2479 (-) | 1     | 1     | tGCATTt              |
| I\$TCF_Q6      | TCF          | 2482 (-) | 1     | 0.97  | atTTGATTg            |
| V\$SOX4_Q5     | Sox-4        | 2484 (-) | 1     | 1     | tTTGTT               |
| V\$SRY_01      | SRY          | 2484 (-) | 1     | 1     | ttTGTTT              |
| V\$PBX1_03     | Pbx-1        | 2484 (-) | 1     | 0.972 | ttgtTTGATta          |
| V\$SRY_Q6      | SRY          | 2485 (+) | 1     | 1     | TTGTTt               |
| V\$FOXO1A_Q5   | FOXO1A       | 2485 (-) | 1     | 1     | tTGTTT               |
| I\$MIRR_01     | mirr         | 2486 (-) | 1     | 1     | TGTTT                |
| V\$PMX1_Q6     | PMX1         | 2490 (-) | 1     | 1     | tGATTA               |
| V\$CRX_Q4_01   | CRX          | 2491 (-) | 1     | 1     | GATTAg               |
| V\$SMAD3_Q5    | Smad3        | 2494 (-) | 0.99  | 0.956 | tAGGAGacagtc         |
| V\$SMAD2_Q2    | Smad2        | 2495 (-) | 0.922 | 0.938 | aggagacAGTCA         |
| V\$SMAD2_Q6    | Smad2        | 2498 (+) | 1     | 1     | AGACA                |
| V\$NFAT2_Q2    | NFAT2c1dimer | 2513 (-) | 1     | 0.854 | cTTCCAgggga          |
| F\$YDR520C_01  | Ydr520c      | 2514 (+) | 0.786 | 0.765 | ttccagGGGAGttatataat |
| V\$RELA_Q3     | RelA-p65     | 2516 (+) | 0.99  | 0.988 | cCAGGGgagtt          |
| V\$ELK1TEF_01  | Elk-1:TEF    | 2517 (+) | 0.593 | 0.739 | caGGGAgttatataat     |
| F\$YAP1_01     | yAP-1        | 2519 (+) | 0.694 | 0.793 | ggggagTTATAaattata   |
| F\$YAP1_01     | yAP-1        | 2519 (-) | 0.694 | 0.792 | ggggagtaTATAAttata   |
| V\$HLF_01      | HLF          | 2524 (+) | 0.892 | 0.908 | GTTATataat           |
| V\$POU6F1_01   | POU6F1       | 2527 (+) | 1     | 0.894 | atataaTTTAT          |
| V\$ZNF333_01   | ZNF333       | 2529 (+) | 1     | 1     | ATAAT                |

|                  |                 |          |       |       |                    |
|------------------|-----------------|----------|-------|-------|--------------------|
| V\$PRRX2_03      | Prrx2           | 2530 (-) | 1     | 1     | TAATT              |
| V\$CDXA_02       | CdxA            | 2532 (+) | 1     | 1     | aTTTATa            |
| V\$SATB1_Q5_01   | SATB1           | 2532 (+) | 1     | 1     | aTTTAT             |
| V\$CUX1_05       | CDP             | 2532 (-) | 0.748 | 0.787 | aTTTATaatgtaatttat |
| V\$CDX2_Q5_02    | CDX-2           | 2533 (+) | 1     | 1     | TTTATa             |
| F\$MATALPHA2_Q4  | MATalpha2p      | 2533 (+) | 0.898 | 0.913 | ttaTAATGtaatttat   |
| F\$MATALPHA2P_Q4 | MATALPHA2P      | 2533 (-) | 1     | 0.959 | tttataATGTAatt     |
| V\$CUX1HOXA13_01 | CDP:HOXA13      | 2533 (-) | 0.702 | 0.828 | tttataatgtaATTTAt  |
| V\$ZNF333_01     | ZNF333          | 2536 (+) | 1     | 1     | ATAAT              |
| V\$UNCX_02       | UNCX            | 2536 (+) | 0.924 | 0.945 | ataatgtAATTTa      |
| V\$HOXA9_Q5      | Hoxa9           | 2538 (-) | 1     | 0.958 | aatgTAATTtat       |
| V\$PRRX2_03      | Prrx2           | 2542 (-) | 1     | 1     | TAATT              |
| V\$HBP1_04       | HBP1            | 2543 (-) | 1     | 0.921 | aatttatAATGGgccat  |
| V\$CDXA_02       | CdxA            | 2544 (+) | 1     | 1     | aTTTATa            |
| V\$SATB1_Q5_01   | SATB1           | 2544 (+) | 1     | 1     | aTTTAT             |
| V\$SATB1_Q3      | SATB1           | 2544 (+) | 1     | 0.931 | atttaTAATGggccat   |
| V\$CDX2_Q5_02    | CDX-2           | 2545 (+) | 1     | 1     | TTTATa             |
| V\$NANOG_Q3      | Nanog           | 2546 (+) | 1     | 0.99  | ttaTAATGgg         |
| V\$ZNF333_01     | ZNF333          | 2548 (+) | 1     | 1     | ATAAT              |
| V\$YY2           | YY2             | 2548 (-) | 1     | 1     | atAATGG            |
| P\$PEND_01       | PEND            | 2560 (-) | 1     | 1     | acTTCTTa           |
| V\$BLIMP1_03     | Blimp-1         | 2586 (-) | 1     | 0.891 | atTCCAAaacac       |
| V\$FAC1_01       | FAC1            | 2587 (+) | 0.978 | 0.93  | ttccAAAACactgg     |
| P\$HSFA2_01      | HSFA2           | 2589 (+) | 1     | 1     | CCAAAa             |
| I\$MIRR_01       | mirr            | 2592 (+) | 1     | 1     | AAACA              |
| V\$PPARG_08      | PPARgamma       | 2609 (+) | 1     | 0.862 | aatttgatAAAGGact   |
| V\$PPARA_03      | PPARalpha       | 2609 (+) | 1     | 0.864 | aatttgatAAAGGact   |
| V\$PPARG_10      | PPARgamma       | 2609 (+) | 1     | 0.856 | aatttgatAAAGGact   |
| V\$ZNF445_02     | ZNF445          | 2613 (+) | 1     | 1     | tggatAAAGGa        |
| V\$NR4A2RXRA_01  | NURR1:RXR-ALPHA | 2619 (+) | 0.865 | 0.822 | aaggactgTGAACca    |
| V\$ZBTB44_01     | Zbtb44          | 2624 (+) | 1     | 1     | CTGTGa             |
| V\$RARA_07       | RARA            | 2627 (-) | 0.843 | 0.78  | TGAACcattactgtcct  |
| V\$RARG_02       | RARG            | 2627 (-) | 0.824 | 0.819 | tgaaccattacTGTCctt |

|              |        |          |       |       |                          |
|--------------|--------|----------|-------|-------|--------------------------|
| V\$RARA_09   | RARA   | 2627 (-) | 0.852 | 0.78  | tgaaccattacTGTCct        |
| V\$THAP1_01  | Thap1  | 2636 (-) | 1     | 0.816 | actgtccttctctaaacATGGCag |
| V\$YY1_07    | YY1    | 2639 (-) | 1     | 0.94  | gtccttctctaaacATGGCagc   |
| V\$ELF1_Q5   | Elf-1  | 2642 (-) | 1     | 1     | cTTCCT                   |
| V\$SPI1_Q5   | PU.1   | 2642 (-) | 1     | 1     | cTTCCT                   |
| V\$YY1_02    | YY1    | 2643 (-) | 1     | 0.867 | ttcctaaacATGGCagcta      |
| I\$MIRR_01   | mirr   | 2649 (+) | 1     | 1     | AAACA                    |
| V\$YY1_08    | YY1    | 2649 (+) | 1     | 1     | AAACAtggc                |
| V\$YY1_Q6    | YY1    | 2649 (-) | 1     | 0.994 | aaacATGGC                |
| V\$YY1_03    | YY1    | 2649 (-) | 1     | 0.872 | aaacATGGCagc             |
| V\$YY1_12    | YY1    | 2649 (+) | 1     | 0.971 | aaacATGGCagc             |
| V\$YY1_13    | YY1    | 2649 (+) | 1     | 0.97  | aaacATGGCagct            |
| V\$YY1_14    | YY1    | 2649 (+) | 1     | 0.937 | aaacATGGCagc             |
| V\$YY1_15    | YY1    | 2649 (+) | 1     | 0.95  | aaacATGGCagc             |
| V\$YY1_Q6_02 | YY1    | 2650 (-) | 1     | 0.995 | aacATGGCagc              |
| V\$REX1_05   | REX-1  | 2650 (-) | 1     | 0.949 | aacATGGCagct             |
| V\$SOX8_04   | Sox-8  | 2659 (-) | 1     | 0.968 | gctaaaaTGAATgt           |
| P\$O2_04     | O2     | 2670 (-) | 0.898 | 0.826 | tgtgagCTGGCag            |
| V\$CMYB_01   | c-Myb  | 2672 (+) | 0.988 | 0.954 | tgagctggcaGTTGTggt       |
| V\$MYB_03    | MYB    | 2674 (-) | 1     | 0.963 | agctggCAGTTgtggt         |
| V\$MYB_Q3    | c-MYB  | 2675 (+) | 1     | 0.999 | gctggCAGTTg              |
| V\$MYB_10    | c-Myb  | 2675 (+) | 1     | 0.993 | gctggCAGTTgt             |
| V\$MYB_11    | c-Myb  | 2675 (+) | 1     | 0.983 | gctggCAGTTgt             |
| V\$HSF4_Q3   | HSF4   | 2676 (-) | 1     | 1     | ctGGCAG                  |
| V\$MYB_Q4    | c-Myb  | 2676 (+) | 1     | 0.998 | ctggCAGTTgtg             |
| V\$MYB_08    | c-Myb  | 2676 (+) | 1     | 0.986 | ctggCAGTTgt              |
| V\$MYB_Q5_01 | MYB    | 2677 (-) | 1     | 1     | tggCAGTTg                |
| V\$CMYB_Q5   | c-Myb  | 2677 (-) | 1     | 0.997 | tggCAGTTgtg              |
| V\$MYB_07    | c-Myb  | 2677 (-) | 1     | 0.996 | tggCAGTTgt               |
| V\$MYB_Q6    | c-Myb  | 2678 (-) | 1     | 0.995 | ggCAGTTgtg               |
| V\$MYB_09    | MYB    | 2678 (-) | 1     | 1     | ggCAGTTgtg               |
| P\$MYBAS1_01 | MYBAS1 | 2678 (-) | 0.999 | 0.999 | ggcaGTTGTgg              |
| V\$AML_Q6    | AML    | 2679 (+) | 1     | 0.974 | gcagtTGTGGttaat          |

|                  |             |          |       |       |                          |
|------------------|-------------|----------|-------|-------|--------------------------|
| V\$AML2_01       | AML2        | 2683 (-) | 1     | 1     | ttGTGGTt                 |
| V\$AML3_Q6       | AML3        | 2683 (-) | 1     | 1     | ttGTGGTt                 |
| V\$AML1_Q6       | AML1        | 2684 (+) | 1     | 1     | TGTGGt                   |
| V\$AML1_Q5       | AML1        | 2684 (+) | 1     | 1     | TGTGGt                   |
| V\$PEBP2B_Q6     | PEBP2beta   | 2684 (+) | 1     | 1     | TGTGGtt                  |
| V\$AML1_01       | AML1a       | 2684 (+) | 1     | 1     | tGTGGT                   |
| V\$AML1_Q4       | AML1        | 2684 (+) | 1     | 1     | tGTGGTt                  |
| V\$AML_Q4        | AML         | 2684 (+) | 1     | 1     | tGTGGTta                 |
| V\$E2F3EOMES_01  | E2F-3:TBR2  | 2684 (-) | 0.765 | 0.74  | tgtggttaatGTGCCagctcaaag |
| V\$ISL1_Q3       | islet1      | 2687 (+) | 1     | 1     | ggtTAATG                 |
| V\$IPF1_Q6       | ipf1        | 2689 (-) | 1     | 1     | tTAATG                   |
| P\$O2_04         | O2          | 2694 (+) | 0.898 | 0.826 | gtGCCAGctcaaa            |
| V\$EAR2_Q2       | EAR2        | 2698 (-) | 1     | 0.914 | cagctCAAAGttaa           |
| V\$RXRA_05       | RXRA        | 2698 (+) | 1     | 0.781 | cagctCAAAGttaa           |
| V\$LEF1_Q2       | TCF-7       | 2702 (+) | 1     | 1     | tCAAAG                   |
| V\$TCF3_Q6       | TCF-3       | 2702 (-) | 1     | 1     | tCAAAG                   |
| V\$MSX2_Q3       | Msx-2       | 2709 (+) | 0.905 | 0.941 | TAAATggggagt             |
| V\$P300_01       | p300        | 2712 (+) | 1     | 0.978 | atggGGAGTgagaa           |
| V\$MZF1_Q5       | MZF-1       | 2713 (+) | 1     | 1     | tGGGGAg                  |
| V\$E2F3TBX21_01  | E2F-3:T-bet | 2717 (+) | 0.94  | 0.825 | gagTGAGAaggtgtct         |
| V\$TFIII_Q6_01   | TFII-I      | 2721 (+) | 0.963 | 0.966 | gAGAAggtgt               |
| V\$SMAD3_03      | Smad3       | 2723 (-) | 1     | 0.987 | gaaggtGTCTGgatgct        |
| V\$SMAD_Q6       | SMAD        | 2724 (-) | 1     | 0.997 | aaggTGTCT                |
| F\$RAP1_03       | RAP1        | 2724 (-) | 0.941 | 0.911 | aaggtgtctGGATGt          |
| V\$SMAD4_Q6      | SMAD4       | 2725 (-) | 0.99  | 0.922 | aggTGTCTggatgct          |
| V\$SMAD4_05      | SMAD4       | 2728 (+) | 0.977 | 0.982 | tGTCTGga                 |
| V\$FOXO1SPDEF_01 | FOXO1A:PDEF | 2729 (+) | 1     | 0.918 | gtctGGATGtcat            |
| I\$CHES1L_02     | CHES1L      | 2734 (-) | 0.8   | 0.827 | gatgtcatgGAGTCattctcaa   |
| I\$TLL_03        | Tll         | 2734 (+) | 0.794 | 0.841 | gatgtcatgGAGTCa          |
| V\$FOS_09        | C-FOS       | 2737 (-) | 0.883 | 0.844 | gtcatggAGTCAttctc        |
| V\$NFE2L1_Q5     | Nfe2l1      | 2739 (+) | 1     | 0.964 | catggaGTCATt             |
| F\$GCN4_Q2       | Gcn4p       | 2740 (+) | 1     | 0.964 | atggAGTCAtt              |
| F\$GCN4_C        | Gcn4p       | 2742 (-) | 1     | 0.99  | ggAGTCAttc               |

|                   |              |          |       |       |                            |
|-------------------|--------------|----------|-------|-------|----------------------------|
| V\$CJUN_Q6        | C-Jun        | 2743 (-) | 1     | 1     | gAGTCA                     |
| F\$ADR1_Q6        | Adr1p        | 2748 (-) | 1     | 0.958 | atTCTCCaaa                 |
| V\$SPIB_Q3        | Spi-B        | 2749 (+) | 1     | 1     | TTCTCc                     |
| V\$BRN1_Q6        | BRN1         | 2760 (-) | 1     | 1     | tGCATTt                    |
| P\$MYB3R5_01      | MYB3R5       | 2760 (+) | 0.792 | 0.782 | gcatttcaCCCTTg             |
| P\$MYB3R1_01      | MYB3R1       | 2761 (+) | 0.789 | 0.792 | gcatttcaCCCTTgt            |
| P\$MYB3R4_01      | MYB3R4       | 2761 (+) | 0.792 | 0.801 | gcatttcaCCCTTgt            |
| P\$AT1G77200_03   | AT1G77200    | 2768 (-) | 0.797 | 0.831 | acccttGTGGGtga             |
| V\$PAX8_B         | Pax-8        | 2768 (+) | 0.902 | 0.893 | acccttgtGGGTGagatg         |
| V\$EGR3_Q3        | egr-3        | 2774 (+) | 1     | 1     | GTGGGt                     |
| P\$ASR1_01        | ASR-1        | 2775 (-) | 1     | 1     | TGGGT                      |
| V\$TEAD4HOXB13_01 | TEF-3:HOXB13 | 2783 (+) | 1     | 0.917 | atggTAAAAtgtg              |
| I\$DMRT93B_01     | dmrt93B      | 2801 (+) | 1     | 0.996 | aatGATACagt                |
| I\$OPTIX_01       | Optix        | 2803 (+) | 1     | 1     | TGATA                      |
| I\$SIX4_01        | Six-4        | 2803 (+) | 1     | 1     | TGATAc                     |
| I\$SO_01          | so           | 2803 (+) | 1     | 1     | TGATAc                     |
| V\$FOXO1ETV7_01   | FOXO1A:ETV7  | 2806 (+) | 0.627 | 0.795 | tacaGTAGGaggatttccag       |
| V\$ETS1_03        | ETS1         | 2810 (+) | 0.861 | 0.725 | gtaggaggatTTTCcagg         |
| V\$CREL_Q6        | c-Rel        | 2814 (+) | 1     | 0.961 | gaggatTTTCCa               |
| V\$RELA_Q6        | RelA-p65     | 2815 (+) | 0.996 | 0.976 | aGGATTtccag                |
| I\$DL_01          | dl           | 2815 (+) | 1     | 0.904 | aggatTTTCCa                |
| V\$NFKB1_03       | NF-kappaB1   | 2815 (+) | 1     | 0.98  | aggatTTTCCa                |
| V\$RELA_09        | RelA-p65     | 2815 (+) | 1     | 0.955 | aggatTTTCCa                |
| F\$FACBCA_Q2      | FACB         | 2817 (-) | 0.911 | 0.91  | gattTTCCAggcctcacaggagtgtt |
| F\$FACBCA_Q2      | FACB         | 2817 (+) | 0.989 | 0.905 | gattttccaggcctcacAGGAGtgtt |
| V\$NFAT3_Q3_01    | NFATc4       | 2818 (-) | 1     | 1     | atTTTCCa                   |
| V\$NFAT1_Q6       | NFATc2       | 2819 (-) | 1     | 1     | tTTTCC                     |
| V\$NFAT4_Q3       | NFATc3       | 2819 (-) | 1     | 1     | tTTTCC                     |
| V\$NFATC2_01      | NFATc2       | 2819 (+) | 1     | 1     | tTTTCCa                    |
| V\$NFAT1_Q4       | NFATc2       | 2819 (-) | 1     | 1     | tTTTCC                     |
| V\$NFE4_Q5_01     | NF-E4        | 2827 (-) | 1     | 1     | gCCTCAc                    |
| V\$ZBTB44_01      | Zbtb44       | 2830 (-) | 1     | 1     | tCACAG                     |
| V\$GATAD2A_01     | GATAD2A      | 2831 (-) | 1     | 1     | CACAGg                     |

|               |          |          |       |       |                      |
|---------------|----------|----------|-------|-------|----------------------|
| P\$REM16_01   | REM16    | 2836 (+) | 0.782 | 0.739 | gagtgtttttggggGGAGAt |
| V\$RREB1_01   | RREB-1   | 2837 (-) | 1     | 0.875 | agtgttttTTGGGg       |
| P\$DEL2_02    | DEL2     | 2837 (+) | 0.818 | 0.813 | agtgtttttGGGGGgagat  |
| I\$MIRR_01    | mirr     | 2839 (-) | 1     | 1     | TGTTT                |
| F\$YML081W_01 | Yml081wp | 2840 (-) | 0.897 | 0.829 | gtttttGGGGGgagatctta |
| V\$ZBTB7B_03  | Zbtb7b   | 2841 (-) | 1     | 0.988 | tttttGGGGGgaga       |
| V\$E2F2_06    | E2F2     | 2841 (+) | 0.763 | 0.725 | tttttGGGGGgagatct    |
| V\$MSX2_Q3    | Msx-2    | 2842 (+) | 0.966 | 0.951 | TTTTTgggggga         |
| P\$HSFA2_01   | HSFA2    | 2843 (-) | 1     | 1     | tTTTGG               |
| P\$DEL1_02    | DEL1     | 2843 (-) | 0.796 | 0.794 | tttggGGGGAgatcttacgg |
| V\$ETS1_03    | ETS1     | 2847 (+) | 0.807 | 0.736 | ggggggagatCTTACggt   |
| V\$GATA3_03   | GATA-3   | 2851 (+) | 1     | 0.967 | ggaGATCTta           |
| P\$SPL1_01    | SPL1     | 2855 (+) | 0.791 | 0.755 | atCTTACggt           |
| P\$SPL1_01    | SPL1     | 2855 (-) | 0.791 | 0.755 | atcTTACGgt           |

Extended Data Table 3-Known motif discovery analysis of NAMPT enhancer using GENOMATIX Software suite  
relate to Figs. 3d, 3e and Extended Data Figs. 5d, 5e

| Motif ID | Detailed Family Information                                             | Alt Motif ID   | Motif Information                                                                      | Start | End  | Anchor | Strand | Matrix sim | Matched Sequence            |
|----------|-------------------------------------------------------------------------|----------------|----------------------------------------------------------------------------------------|-------|------|--------|--------|------------|-----------------------------|
| V\$ARID  | AT rich interactive domain factor                                       | V\$MRF2.01     | Modulator recognition factor 2 (MRF2, ARID5B)                                          | 215   | 235  | 225    | (+)    | 1          | acaaAATAccaagcaccacat       |
| V\$ZF02  | C2H2 zinc finger transcription factors 2                                | V\$ZKSCAN3.01  | Zinc finger with KRAB and SCAN domains 3                                               | 307   | 329  | 318    | (-)    | 1          | ccctcCCCCaccctatgacagcc     |
| V\$MZF1  | Myeloid zinc finger 1 factors                                           | V\$MZF1.03     | Myeloid zinc finger protein MZF1                                                       | 321   | 331  | 326    | (+)    | 1          | ggGGGGgagggc                |
| V\$TCFF  | TCF11 transcription factor                                              | V\$TCF11.01    | TCF11/LCR-F1/Nrf1 homodimers                                                           | 364   | 370  | 367    | (-)    | 1          | GTCAtt                      |
| V\$TCFF  | TCF11 transcription factor                                              | V\$TCF11.01    | TCF11/LCR-F1/Nrf1 homodimers                                                           | 496   | 502  | 499    | (-)    | 1          | GTCAtt                      |
| V\$FKHD  | Fork head domain factors                                                | V\$ILF1.01     | Winged-helix transcription factor IL-2 enhancer binding factor                         | 588   | 604  | 596    | (-)    | 1          | agaagggaaAACAcatt           |
| V\$RUSH  | SWI/SNF related nucleophosphoproteins                                   | V\$SMARCA3.01  | SWI/SNF related, matrix associated, actin dependent regulator                          | 655   | 665  | 660    | (-)    | 1          | taCCATttgtc                 |
| V\$FKHD  | Fork head domain factors                                                | V\$FOXP1_ES.01 | Alternative splicing variant of FOXP1, activated in ESCs                               | 671   | 687  | 679    | (+)    | 1          | aaaataAACAAAAA              |
| V\$FKHD  | Fork head domain factors                                                | V\$FOXP1_ES.01 | Alternative splicing variant of FOXP1, activated in ESCs                               | 733   | 749  | 741    | (+)    | 1          | gagctaaAACActctaa           |
| V\$TAIP  | TGF-beta induced apoptosis proteins                                     | V\$CSRNP1.01   | Cysteine-serine-rich nuclear protein 1 (AXUD1, AXIN1 up-regulated)                     | 741   | 747  | 744    | (-)    | 1          | AGAGTgt                     |
| V\$PLAG  | Pleomorphic adenoma gene                                                | V\$PLAG1.02    | Pleomorphic adenoma gene 1                                                             | 985   | 1007 | 996    | (+)    | 1          | aaGGGGgataaaggccaggggaa     |
| V\$TCFF  | TCF11 transcription factor                                              | V\$TCF11.01    | TCF11/LCR-F1/Nrf1 homodimers                                                           | 1044  | 1050 | 1047   | (-)    | 1          | GTCAtt                      |
| V\$RUSH  | SWI/SNF related nucleophosphoproteins                                   | V\$SMARCA3.02  | SWI/SNF related, matrix associated, actin dependent regulator                          | 1101  | 1111 | 1106   | (-)    | 1          | ggtACTTttc                  |
| V\$NKXH  | NKX homeodomain factors                                                 | V\$NKX25.01    | Homeo domain factor Nkx-2.5/Csx, tinman homolog, high                                  | 1101  | 1119 | 1110   | (-)    | 1          | cagttcAAGTgacttttc          |
| V\$FKHD  | Fork head domain factors                                                | V\$FOXP1_ES.01 | Alternative splicing variant of FOXP1, activated in ESCs                               | 1134  | 1150 | 1142   | (+)    | 1          | cagctaaAACAcagggag          |
| V\$FKHD  | Fork head domain factors                                                | V\$FOXP1_ES.01 | Alternative splicing variant of FOXP1, activated in ESCs                               | 1215  | 1231 | 1223   | (-)    | 1          | tagagaaAACAtaacac           |
| V\$FKHD  | Fork head domain factors                                                | V\$FOXP1_ES.01 | Alternative splicing variant of FOXP1, activated in ESCs                               | 1249  | 1265 | 1257   | (+)    | 1          | ttcaaaAACAAcaaaa            |
| V\$FKHD  | Fork head domain factors                                                | V\$FOXP1_ES.01 | Alternative splicing variant of FOXP1, activated in ESCs                               | 1258  | 1274 | 1266   | (+)    | 1          | caaaacAACAAcaaaa            |
| V\$CABL  | C-abl DNA binding sites                                                 | V\$CABL.01     | Multifunctional c-Abl src type tyrosine kinase                                         | 1263  | 1273 | 1268   | (+)    | 1          | aaAACAAcaaaa                |
| V\$FKHD  | Fork head domain factors                                                | V\$FOXP1.02    | Sites bound by FOXP1 and an alternative splicing variant                               | 1261  | 1277 | 1269   | (+)    | 1          | acaacAACAAagcta             |
| V\$FKHD  | Fork head domain factors                                                | V\$FOXP1_ES.01 | Alternative splicing variant of FOXP1, activated in ESCs                               | 1385  | 1401 | 1393   | (+)    | 1          | actgcaaAACAgatcag           |
| V\$FKHD  | Fork head domain factors                                                | V\$FOXP1_ES.01 | Alternative splicing variant of FOXP1, activated in ESCs                               | 1449  | 1465 | 1457   | (+)    | 1          | aatgaaaAACAgaaaca           |
| V\$BRAC  | Brachyury gene, mesoderm development                                    | V\$TBX20.01    | T-box transcription factor TBX20                                                       | 1946  | 1974 | 1960   | (-)    | 1          | aggagaaagAGGTgtgaggtctgagcg |
| V\$TAIP  | TGF-beta induced apoptosis proteins                                     | V\$CSRNP1.01   | Cysteine-serine-rich nuclear protein 1 (AXUD1, AXIN1 up-regulated)                     | 2165  | 2171 | 2168   | (-)    | 1          | AGAGTgg                     |
| V\$NKXH  | NKX homeodomain factors                                                 | V\$NKX25.01    | Homeo domain factor Nkx-2.5/Csx, tinman homolog, high                                  | 2367  | 2385 | 2376   | (-)    | 1          | tgctcAAGTgagtacta           |
| V\$FKHD  | Fork head domain factors                                                | V\$FOXP1_ES.01 | Alternative splicing variant of FOXP1, activated in ESCs                               | 2586  | 2602 | 2594   | (+)    | 1          | attccaaAACActgggc           |
| V\$FKHD  | Fork head domain factors                                                | V\$FOXP1_ES.01 | Alternative splicing variant of FOXP1, activated in ESCs                               | 2643  | 2659 | 2651   | (+)    | 1          | ttcctaaAACAtggcag           |
| V\$SMAD  | Vertebrate SMAD family of transcription factors                         | V\$SMAD3.01    | Smad3 transcription factor involved in TGF-beta signaling                              | 2726  | 2736 | 2731   | (+)    | 1          | ggtGTCtggat                 |
| V\$FKHD  | Fork head domain factors                                                | V\$FOXP1_ES.01 | Alternative splicing variant of FOXP1, activated in ESCs                               | 2833  | 2849 | 2841   | (-)    | 1          | cccaaaaAACActctctg          |
| V\$EV11  | EV11-myeloid transforming protein                                       | V\$MEL1.02     | MEL1 (MDS1/EV11-like gene 1) DNA-binding domain 2                                      | 137   | 153  | 145    | (+)    | 0.999      | aaaaatgGATGagttca           |
| V\$EV11  | EV11-myeloid transforming protein                                       | V\$MEL1.02     | MEL1 (MDS1/EV11-like gene 1) DNA-binding domain 2                                      | 1922  | 1938 | 1930   | (-)    | 0.999      | tgcaagGATGagtaga            |
| V\$MYBL  | Cellular and viral myb-like transcriptional regulators                  | V\$SCMYB.01    | c-Myb, important in hematopoiesis, cellular equivalent to avian                        | 2674  | 2694 | 2684   | (-)    | 0.998      | cattaaccaAACActgccagct      |
| V\$CABL  | C-abl DNA binding sites                                                 | V\$CABL.01     | Multifunctional c-Abl src type tyrosine kinase                                         | 676   | 686  | 681    | (+)    | 0.997      | aaAACAAAAA                  |
| V\$ZFXH  | Two-handed zinc finger homeodomain transcription factors                | V\$DELTAEF1.02 | Delta-crystallin enhancer binding factor, transcription factor                         | 244   | 256  | 250    | (-)    | 0.996      | ttctcACCTgtga               |
| V\$BPTF  | Bromodomain and PHD domain transcription factors                        | V\$FAC1.01     | Fetal Alz-50 clone 1 (FAC1)                                                            | 628   | 638  | 633    | (-)    | 0.996      | cccacAACACA                 |
| V\$FKHD  | Fork head domain factors                                                | V\$FOXP1.01    | Forkhead box P1                                                                        | 1437  | 1453 | 1445   | (+)    | 0.996      | agaaggtAACAAaatga           |
| V\$NEUR  | NeuroD, Beta2, HLH domain                                               | V\$OLIG2.01    | Oligodendrocyte lineage transcription factor 2                                         | 1723  | 1737 | 1730   | (-)    | 0.996      | ctcccaGGCTGccttt            |
| V\$MZF1  | Myeloid zinc finger 1 factors                                           | V\$MZF1.01     | Myeloid zinc finger protein MZF1                                                       | 2847  | 2857 | 2852   | (+)    | 0.996      | ggGGGGgagatc                |
| V\$MZF1  | Myeloid zinc finger 1 factors                                           | V\$MZF1.02     | Myeloid zinc finger protein MZF1                                                       | 1506  | 1516 | 1511   | (+)    | 0.995      | atGGGGaaatg                 |
| V\$SMAD  | Vertebrate SMAD family of transcription factors                         | V\$SMAD3.01    | Smad3 transcription factor involved in TGF-beta signaling                              | 2250  | 2260 | 2255   | (-)    | 0.995      | gcaGTCtggct                 |
| V\$RU49  | Zinc finger transcription factor RU49, zinc finger transcription factor | V\$RU49.01     | Zinc finger transcription factor RU49 (zinc finger proliferating cell nuclear antigen) | 788   | 794  | 791    | (-)    | 0.994      | cAGTAcc                     |
| V\$GREF  | Glucocorticoid responsive and related elements                          | V\$ARE.03      | Androgene receptor binding site, IR3 sites                                             | 1763  | 1781 | 1772   | (+)    | 0.994      | cagggacagttGTTTctt          |
| V\$ZF02  | C2H2 zinc finger transcription factors 2                                | V\$ZNF219.01   | Kruppel-like zinc finger protein 219                                                   | 309   | 331  | 320    | (-)    | 0.993      | gccctCCCccaccctatgacag      |
| V\$ZTRE  | Zinc transcriptional regulatory element                                 | V\$ZTRE.03     | 5' half site of ZTRE motif                                                             | 314   | 330  | 322    | (-)    | 0.993      | ccCTCCccaccctatg            |
| V\$ZF02  | C2H2 zinc finger transcription factors 2                                | V\$ZBP89.01    | Zinc finger transcription factor ZBP-89                                                | 312   | 334  | 323    | (-)    | 0.993      | gtgcccCOCccaccctatga        |
| V\$BTBF  | BTB/POZ (broad complex, TramTrack, Breathless) domain factors           | V\$KAIISO.01   | Transcription factor Kaiso, ZBTB33                                                     | 2207  | 2221 | 2214   | (-)    | 0.993      | catcCTGCcactcca             |
| V\$BCDF  | Bicoid-like homeodomain transcription factors                           | V\$OTX2.01     | Homeodomain transcription factor Otx2 (homolog of Drosophila)                          | 82    | 98   | 90     | (-)    | 0.992      | ctttTAAAtccagttca           |
| V\$SETF  | Human and murine ETS1 factors                                           | V\$ETV1.02     | Ets variant 1                                                                          | 275   | 295  | 285    | (+)    | 0.992      | tgagacacaGAAgaggaacct       |
| V\$EGRF  | EGF/nerve growth factor induced protein                                 | V\$CKROX.01    | Collagen krox protein (zinc finger protein 67 - zfp67)                                 | 318   | 336  | 327    | (+)    | 0.992      | ggtggGGAGgggcagcg           |
| V\$ZF11  | C2H2 zinc finger transcription factors 11                               | V\$ZBTB3.01    | Zinc finger and BTB domain containing 3                                                | 1555  | 1565 | 1560   | (+)    | 0.992      | gtcaGCCAggc                 |
| V\$MOKF  | Mouse Krueppel like factor                                              | V\$MOK2.02     | Ribonucleoprotein associated zinc finger protein MOK-2 (human)                         | 1612  | 1632 | 1622   | (-)    | 0.992      | cccggcatcggaCCTTtgccc       |
| V\$ZF35  | Zinc finger protein ZNF35                                               | V\$ZNF35.01    | Human zinc finger protein ZNF35                                                        | 1627  | 1639 | 1633   | (+)    | 0.992      | gcccggAAGAtct               |
| V\$HEAT  | Heat shock factors                                                      | V\$HSF2.02     | Heat shock factor 2                                                                    | 1976  | 2000 | 1988   | (-)    | 0.992      | ccaaggacactaAGAAcaatctgc    |
| V\$GATA  | GATA binding factors                                                    | V\$GATA.01     | GATA binding factor                                                                    | 2295  | 2307 | 2301   | (-)    | 0.992      | cacaGATAagtaa               |
| V\$CDXF  | Vertebrate caudal related homeodomain proteins                          | V\$CDX2.03     | Caudal type homeobox transcription factor 2                                            | 14    | 32   | 23     | (+)    | 0.991      | atgtgtTATTTggcgca           |
| V\$KLF5  | Kruppel like transcription factors                                      | V\$KLF2.01     | Kruppel-like factor 2 (lung) (LKL2)                                                    | 312   | 330  | 321    | (+)    | 0.991      | tcatgGGTgggggaggg           |
| V\$AP1F  | AP1, Activating protein 1                                               | V\$JUNB.01     | Transcription factor Jun-B                                                             | 1033  | 1045 | 1039   | (-)    | 0.991      | ttctgGTAAtgt                |
| V\$AP1R  | MAF and AP1 related factors                                             | V\$MARE.02     | Binding sites for homodimers of large Maf-proteins                                     | 1366  | 1390 | 1378   | (+)    | 0.991      | aacattgcagattcAGCAgactgca   |
| V\$LTSM  | Localized tandem sequence motif                                         | V\$LTSM.03     | LTSM elements with 8 bp spacer                                                         | 1623  | 1637 | 1630   | (-)    | 0.991      | ATCTtcccggcatcg             |
| V\$MZF1  | Myeloid zinc finger 1 factors                                           | V\$MZF1.02     | Myeloid zinc finger protein MZF1                                                       | 1703  | 1713 | 1708   | (+)    | 0.991      | aaGGGGgagaga                |
| V\$SORY  | SOX/SRY-sex/testis determining and related factors                      | V\$SOX6.01     | SRY (sex determining region Y)-box 6                                                   | 2081  | 2103 | 2092   | (-)    | 0.991      | aatgACAaagccaaaaaggaga      |
| V\$HAND  | Twist subfamily of class B bHLH transcription factors                   | V\$SCX.01      | Tendon-specific bHLH transcription factor scleraxis                                    | 392   | 412  | 402    | (-)    | 0.99       | aggtatcatgTGCCatgtg         |

|          |                                               |                  |                                                              |      |      |      |     |       |                           |
|----------|-----------------------------------------------|------------------|--------------------------------------------------------------|------|------|------|-----|-------|---------------------------|
| V\$MYOD  | Myoblast determining factors                  | V\$TCFE2A.03     | Transcription factor E2a (E12/E47)                           | 1723 | 1739 | 1731 | (-) | 0.99  | IgctccCAGCtccttt          |
| V\$CIZF  | CAS interacting zinc finger protein           | V\$NMP4.01       | NMP4 (nuclear matrix protein 4) / CIZ (Cas-interacting zinc  | 2124 | 2134 | 2129 | (-) | 0.99  | ggAAAaAatc                |
| V\$BEDF  | BED subclass of zinc-finger proteins          | V\$ZBED4.02      | Zinc finger, BED-type containing 4; polyG binding sites      | 315  | 329  | 322  | (+) | 0.989 | IgggggtGGGgaggg           |
| V\$CDXF  | Vertebrate caudal related homeodomain p       | V\$CDX2.03       | Caudal type homeobox transcription factor 2                  | 1315 | 1333 | 1324 | (-) | 0.989 | ataaafatTTATgaaata        |
| V\$ABDB  | Abdominal-B type homeodomain transcrip        | V\$HOBX9.02      | Homeobox B9                                                  | 128  | 144  | 136  | (+) | 0.988 | tacagccaTAAaAatgg         |
| V\$SORY  | SOX/SRY-sex/testis determining and relat      | V\$SOX3.01       | SRY-related HMGB-box gene 30                                 | 256  | 278  | 267  | (+) | 0.988 | attgacCAAtgagaacacatgga   |
| V\$XBBF  | X-box binding factors                         | V\$SRFX.02       | Regulatory factor X, 4 (secondary DNA binding preference     | 803  | 821  | 812  | (-) | 0.988 | gggctttcctaGTTTAcac       |
| V\$AP1R  | MAF and AP1 related factors                   | V\$BACH2.01      | BTB and CNC homology 1, basic leucine zipper transcripti     | 1026 | 1050 | 1038 | (-) | 0.988 | gtcatttcTGAGtcagtcttaaa   |
| V\$YY1F  | Activator/repressor binding to transcription  | V\$YY2.02        | Transcription factor yin yang 2                              | 128  | 150  | 139  | (+) | 0.987 | actcatCCATttttatggctgta   |
| V\$RUSH  | SWI/SNF related nucleophosphoproteins         | V\$SMARCA3.02    | SWI/SNF related, matrix associated, actin dependent regul    | 2556 | 2566 | 2561 | (+) | 0.987 | ccatACTTctt               |
| V\$EGRF  | EGR/nerve growth factor induced protein       | V\$SWT1.01       | Wlms Tumor Suppressor                                        | 315  | 333  | 324  | (+) | 0.986 | IggggGGGggggggggcga       |
| V\$RUSH  | SWI/SNF related nucleophosphoproteins         | V\$SMARCA3.02    | SWI/SNF related, matrix associated, actin dependent regul    | 2293 | 2303 | 2298 | (+) | 0.986 | atttACTTatc               |
| V\$SATB  | Special AT-rich sequence binding protein      | V\$SATB1.01      | Special AT-rich sequence-binding protein 1, predominantly    | 2465 | 2479 | 2472 | (-) | 0.986 | actAAATAttaaaaa           |
| V\$BZIP  | Heterodimers between bZIP family membe        | V\$CEBPE_ATF4.01 | Heterodimer of CEBP epsilon and ATF4                         | 2377 | 2389 | 2383 | (+) | 0.985 | cttgagGCAAcac             |
| V\$RUSH  | SWI/SNF related nucleophosphoproteins         | V\$SMARCA3.01    | SWI/SNF related, matrix associated, actin dependent regul    | 2707 | 2717 | 2712 | (-) | 0.985 | cccCATttaa                |
| V\$ZFYX  | Zfx and Zfy - transcription factors implicat  | V\$ZFX.01        | X-linked zinc finger protein                                 | 2821 | 2831 | 2826 | (-) | 0.985 | gaGGCctggaa               |
| V\$ZTRE  | Zinc transcriptional regulatory element       | V\$ZTRE.04       | 3' half site of ZTRE motif                                   | 322  | 338  | 330  | (+) | 0.984 | gggGAGGggcgacggga         |
| V\$NF1F  | Nuclear factor 1                              | V\$NF1.03        | Non-palindromic nuclear factor I binding sites               | 709  | 729  | 719  | (-) | 0.984 | ctggtctgcctcGCCAgaaa      |
| V\$NF1F  | Nuclear factor 1                              | V\$NF1.03        | Non-palindromic nuclear factor I binding sites               | 1083 | 1103 | 1093 | (+) | 0.984 | atgctgtaaatGCCaAaaa       |
| V\$ZFHX  | Two-handed zinc finger homeodomain tra        | V\$AREB6.01      | AREB6 (Atp1a1 regulatory element binding factor 6)           | 1206 | 1218 | 1212 | (+) | 0.984 | cacatACCtTgtgt            |
| V\$ZFHX  | Two-handed zinc finger homeodomain tra        | V\$AREB6.04      | AREB6 (Atp1a1 regulatory element binding factor 6)           | 1361 | 1373 | 1367 | (-) | 0.984 | gcaatGTTTTcaaa            |
| O\$INRE  | Core promoter initiator elements              | O\$DINR.01       | Drosophila initiator motifs                                  | 1445 | 1455 | 1450 | (-) | 0.984 | tTCATttgtt                |
| V\$SPZ1  | Testis-specific bHLH-Zip transcription fac    | V\$SPZ1.01       | Spermatogenic Zip 1 transcription factor                     | 1640 | 1650 | 1645 | (+) | 0.984 | tGGAGgttttg               |
| V\$CDXF  | Vertebrate caudal related homeodomain p       | V\$CDX1.01       | Intestine specific homeodomain factor CDX-1                  | 462  | 480  | 471  | (-) | 0.983 | ttttttTTTActattatt        |
| V\$AP1F  | AP1, Activating protein 1                     | V\$BATF.01       | Basic leucine zipper transcription factor, ATF-like          | 1033 | 1045 | 1039 | (+) | 0.983 | acatgaCTCAGaa             |
| V\$HOMF  | Homeodomain transcription factors             | V\$HHEX.01       | Hematopoietically expressed homeobox, proline-rich home      | 1154 | 1172 | 1163 | (-) | 0.983 | ttccctgtctTAAAtaga        |
| V\$BPTF  | Bromodomain and PHD domain transcrip          | V\$FAC1.01       | Fetal Atz-50 clone 1 (FAC1)                                  | 1263 | 1273 | 1268 | (+) | 0.983 | aaaaAACAAaa               |
| V\$HAML  | Human acute myelogenous leukemia fact         | V\$AML2.01       | RUNX3 (Runt-related transcription factor 3), AML2 (Acute     | 2681 | 2695 | 2688 | (+) | 0.983 | agtTGTGGttaagt            |
| V\$ZF02  | C2H2 zinc finger transcription factors 2      | V\$ZBTB7.01      | Zinc finger and BTB domain containing 7, Proto-oncogene      | 2835 | 2857 | 2846 | (-) | 0.983 | gatctcCCCcAAAAaacactcc    |
| V\$SORY  | SOX/SRY-sex/testis determining and relat      | V\$SOX3.01       | SRY-box containing gene 3                                    | 146  | 168  | 157  | (-) | 0.982 | tcctcaCAAaggacatgaactca   |
| V\$MYT1  | MYT1 C2HC zinc finger protein                 | V\$MYT1.02       | MyT1 zinc finger transcription factor involved in primary ne | 453  | 465  | 459  | (+) | 0.982 | ttaAAGTtaata              |
| O\$PTBP  | Plant TATA binding protein factor             | O\$PTATA.02      | Plant TATA box                                               | 1324 | 1338 | 1331 | (-) | 0.982 | agtcTATAaalttt            |
| V\$AP1R  | MAF and AP1 related factors                   | V\$NRLN.02       | Neural retinal basic leucine zipper factor (bZIP)            | 1370 | 1394 | 1382 | (+) | 0.982 | ttgcaqattcAGCAGactgcaaaac |
| V\$SORY  | SOX/SRY-sex/testis determining and relat      | V\$SOX6.01       | SRY (sex determining region Y)-box 6                         | 1806 | 1828 | 1817 | (+) | 0.982 | IgtacACAaAgtaggcaccaat    |
| V\$MYBL  | Cellular and viral myb-like transcriptional r | V\$SCMYB.01      | c-Myb, important in hematopoiesis, cellular equivalent to av | 1862 | 1882 | 1872 | (-) | 0.982 | IatgagtgGCAACagcctcag     |
| V\$HAND  | Two subfamily of class B bHLH transcrip       | V\$TAL1_E2A.01   | Complex of Lmo2 bound to Tal-1, E2A proteins, and GATA       | 2379 | 2399 | 2389 | (-) | 0.982 | ctcaggaCAGGtggtgcctca     |
| V\$PAX3  | PAX-3 binding sites                           | V\$PAX3.03       | Pax-3 paired domain protein                                  | 2734 | 2752 | 2743 | (+) | 0.982 | gatgTCATGgagtcattc        |
| V\$XBBF  | X-box binding factors                         | V\$SRFX.01       | Regulatory factor X, 5 (influences HLA class II expression)  | 1177 | 1195 | 1186 | (-) | 0.981 | ctactgtccAGCAacatc        |
| V\$AP4R  | AP4 and related proteins                      | V\$AP4.03        | Activating enhancer binding protein 4                        | 1722 | 1738 | 1730 | (-) | 0.981 | gctcccaGCTGccittc         |
| V\$ARID  | AT rich interactive domain factor             | V\$ARID5A.01     | AT rich interactive domain 5A (MRF 1-like)                   | 2334 | 2354 | 2344 | (+) | 0.981 | ctgcaATATgaaagctttga      |
| V\$CEBP  | Ccoat/Enhancer Binding Protein                | V\$CEBPE.02      | CCAAT/enhancer binding protein (C/EBP), epsilon              | 603  | 617  | 610  | (+) | 0.98  | ctctttcGCAAcac            |
| V\$SETSF | Human and murine ETS1 factors                 | V\$PDEF.01       | Prostate-derived Ets factor                                  | 2209 | 2229 | 2219 | (+) | 0.979 | gagtgccaGGATgggatgta      |
| V\$CEBP  | Ccoat/Enhancer Binding Protein                | V\$CEBPB.02      | CCAAT/enhancer binding protein beta                          | 2299 | 2313 | 2306 | (-) | 0.979 | ttatcTGTGaaatgg           |
| V\$ARID  | AT rich interactive domain factor             | V\$ARID5A.01     | AT rich interactive domain 5A (MRF 1-like)                   | 2327 | 2347 | 2337 | (-) | 0.979 | tttcaATATgagtcgatgaa      |
| V\$ARID  | AT rich interactive domain factor             | V\$ARID5A.01     | AT rich interactive domain 5A (MRF 1-like)                   | 2460 | 2480 | 2470 | (-) | 0.979 | cactaATATtaaaaaatgga      |
| V\$PAX3  | PAX-3 binding sites                           | V\$PAX3.03       | Pax-3 paired domain protein                                  | 308  | 326  | 317  | (+) | 0.978 | cctgCATGgggtggggg         |
| V\$CIZF  | CAS interacting zinc finger protein           | V\$NMP4.01       | NMP4 (nuclear matrix protein 4) / CIZ (Cas-interacting zinc  | 482  | 492  | 487  | (+) | 0.978 | ggAAAAaaaag               |
| V\$FKHD  | Fork head domain factors                      | V\$SHFH3.01      | HNF-3/Fkh Homolog 3 (FOX11, Freac-6)                         | 1252 | 1268 | 1260 | (+) | 0.978 | aaaaaaAACAAAaaca          |
| V\$SORY  | SOX/SRY-sex/testis determining and relat      | V\$SOX6.01       | SRY (sex determining region Y)-box 6                         | 1264 | 1286 | 1275 | (+) | 0.978 | aaacaCAAagactaactaaact    |
| V\$SAL2  | Spalt-like transcription factor 2             | V\$SALL2.01      | Zinc finger protein Spalt-2, sal-like 2, p150(sal2)          | 315  | 325  | 320  | (+) | 0.977 | IgggGTGGggg               |
| V\$SORY  | SOX/SRY-sex/testis determining and relat      | V\$SOX5.01       | Sox-5                                                        | 1968 | 1990 | 1979 | (-) | 0.977 | taagaaCAATcttgcaaggagaa   |
| V\$ZF05  | C2H2 zinc finger transcription factors 5      | V\$ZFP410.01     | Zinc finger protein 410, APA-1                               | 2215 | 2229 | 2222 | (+) | 0.977 | caggatGGATggta            |
| V\$LEFF  | LEF1/TCF                                      | V\$LEF1.02       | TCF/LEF-1, involved in the Wnt signal transduction pathwa    | 2344 | 2360 | 2352 | (-) | 0.977 | ttagttCAAAGctttc          |
| V\$SETSF | Human and murine ETS1 factors                 | V\$SERG.02       | v-ets erythroblastosis virus E26 oncogene homolog            | 474  | 494  | 484  | (+) | 0.976 | aaaaaaAGAAAAaaagag        |
| V\$NKXH  | NKX homeodomain factors                       | V\$NKX25.05      | Homeodomain factor Nkx-2.5/Csx                               | 1867 | 1885 | 1876 | (-) | 0.976 | agctaTGAgtgcaacagc        |
| V\$HOMF  | Homeodomain transcription factors             | V\$HHEX.01       | Hematopoietically expressed homeobox, proline-rich home      | 450  | 468  | 459  | (+) | 0.975 | aacttaagtTAAAtaata        |
| V\$ZFHX  | Two-handed zinc finger homeodomain tra        | V\$AREB6.02      | AREB6 (Atp1a1 regulatory element binding factor 6)           | 2383 | 2395 | 2389 | (+) | 0.975 | gcaacCACctgtcc            |
| O\$INRE  | Core promoter initiator elements              | O\$DINR.01       | Drosophila initiator motifs                                  | 2797 | 2807 | 2802 | (-) | 0.975 | IaTCATttgag               |
| V\$HIF1  | Hypoxia inducible factor, bHLH/PAS prote      | V\$HRE.03        | Hypoxia response elements, binding sites for HIF1alpha/AF    | 422  | 438  | 430  | (-) | 0.974 | gaccacaACGTgcaggt         |
| V\$BCDF  | Bicoid-like homeodomain transcription fac     | V\$SCRX.01       | Cone-rod homeobox-containing transcription factor / otx-lik  | 1907 | 1923 | 1915 | (-) | 0.974 | gaggtTAACTcctaact         |
| V\$CABL  | C-abl DNA binding sites                       | V\$CABL.01       | Multifunctional c-Abl src type tyrosine kinase               | 1254 | 1264 | 1259 | (+) | 0.973 | aaAACAAcaaa               |
| V\$YY1F  | Activator/repressor binding to transcription  | V\$YY2.01        | Transcription factor yin yang 2                              | 2012 | 2034 | 2023 | (-) | 0.973 | ctaaggCCATttttaaccagggg   |
| V\$NKXH  | NKX homeodomain factors                       | V\$NKX25.05      | Homeodomain factor Nkx-2.5/Csx                               | 233  | 251  | 242  | (-) | 0.972 | acctgTGAgtgagaacatg       |
| V\$AP1R  | MAF and AP1 related factors                   | V\$NRLN.02       | Neural retinal basic leucine zipper factor (bZIP)            | 188  | 212  | 200  | (+) | 0.971 | catcattcAGCAaacatccag     |
| V\$GREF  | Glucocorticoid responsive and related ele     | V\$ARE.04        | Androgene receptor binding site, IR3 sites                   | 1763 | 1781 | 1772 | (-) | 0.971 | agagaaacaactGTCCctg       |
| V\$BCDF  | Bicoid-like homeodomain transcription fac     | V\$PTX1.01       | Pituitary Homeobox 1 (Ptx1, Ptx-1)                           | 2133 | 2149 | 2141 | (-) | 0.971 | IctgCTAAaccctatgg         |
| V\$ZTRE  | Zinc transcriptional regulatory element       | V\$ZTRE.03       | 5' half site of ZTRE motif                                   | 2705 | 2721 | 2713 | (-) | 0.971 | caCTCCcalttaact           |



|         |                                                     |                   |                                                                 |      |      |      |     |       |                              |
|---------|-----------------------------------------------------|-------------------|-----------------------------------------------------------------|------|------|------|-----|-------|------------------------------|
| V\$HMTB | Human muscle-specific Mt binding site               | V\$MTBF.01        | Muscle-specific Mt binding site                                 | 217  | 225  | 221  | (-) | 0.97  | tggtATTTt                    |
| V\$LEFF | LEF1/TCF                                            | V\$LEF1.02        | TCF/LEF-1, involved in the Wnt signal transduction pathway      | 524  | 540  | 532  | (+) | 0.97  | ggagaatCAAAGtatta            |
| V\$LHXF | Lim homeodomain factors                             | V\$LMX1A.02       | LIM homeobox transcription factor 1, alpha                      | 575  | 597  | 586  | (-) | 0.969 | aaacacatTTAAAgatgtctac       |
| V\$GATA | GATA binding factors                                | V\$GATA1.06       | Complex of Lmo2 bound to Tal-1, E2A proteins, and GATA          | 725  | 737  | 731  | (+) | 0.969 | accaGATAgact                 |
| V\$YY1F | Activator/repressor binding to transcription factor | V\$YY2.01         | Transcription factor yin yang 2                                 | 924  | 946  | 935  | (+) | 0.969 | ggattCCATctttggctccaac       |
| V\$ZICF | Members of ZIC-family, zinc finger protein          | V\$ZIC2.02        | Zic family member 2 (odd-paired Drosophila homolog) (sec        | 1062 | 1076 | 1069 | (+) | 0.969 | tcaccCAGCatgacc              |
| V\$YY1F | Activator/repressor binding to transcription factor | V\$YY2.01         | Transcription factor yin yang 2                                 | 1161 | 1183 | 1172 | (-) | 0.969 | caacatCCATattccctgtctt       |
| V\$BRNF | Brn POU domain factors                              | V\$BRN2.03        | Brn-2, POU-III protein class                                    | 1489 | 1507 | 1498 | (-) | 0.969 | aggctccaATTTcaact            |
| V\$NFKB | Nuclear factor kappa B/c-rel                        | V\$NFKAPP65.01    | NF-kappaB (p65)                                                 | 2813 | 2827 | 2820 | (+) | 0.969 | ggaggattTTCcagg              |
| V\$OCT1 | Octamer binding protein                             | V\$OCT2.02        | Octamer-binding transcription factor-2, POU class 2 homeo       | 5    | 19   | 12   | (+) | 0.968 | cacaTGCActgtgt               |
| V\$MIZ1 | Myc-interacting Zn finger protein 1                 | V\$MIZ1.01        | Myc-interacting Zn finger protein 1, zinc finger and BTB do     | 1746 | 1756 | 1751 | (-) | 0.968 | aaagcCCTCta                  |
| V\$CDXF | Vertebrate caudal related homeodomain p             | V\$CDX2.03        | Caudal type homeobox transcription factor 2                     | 128  | 146  | 137  | (-) | 0.967 | atccattTTATggctgta           |
| V\$EVSF | Human and murine ETS1 factors                       | V\$SPI1.02        | SPI-1 proto-oncogene; hematopoietic transcription factor P      | 996  | 1016 | 1006 | (+) | 0.967 | aggccaggGGAAGggaggatg        |
| V\$IRFF | Interferon regulatory factors                       | V\$IRF4.01        | Interferon regulatory factor (IRF)-related protein (NF-EM5,     | 1217 | 1241 | 1229 | (-) | 0.967 | agtttagactagaGAAAcataac      |
| V\$GATA | GATA binding factors                                | V\$GATA1.03       | GATA-binding factor 1                                           | 1849 | 1861 | 1855 | (+) | 0.967 | aaaaGATAaagac                |
| V\$YY1F | Activator/repressor binding to transcription factor | V\$YY2.01         | Transcription factor yin yang 2                                 | 2455 | 2477 | 2466 | (+) | 0.967 | ttattCCATTTtaataatta         |
| V\$ZF57 | KRAB domain zinc finger protein 57                  | V\$ZFP57.01       | Krüppel-associated box-containing zinc-finger protein 57 (T     | 23   | 35   | 29   | (-) | 0.966 | tagTGCcycata                 |
| V\$TALE | TALE homeodomain class recognizing TG               | V\$MEIS1.01       | Binding site for monomeric Meis1 homeodomain protein            | 302  | 318  | 310  | (+) | 0.966 | ccggggcTGTCatggg             |
| V\$NFAT | Nuclear factor of activated T-cells                 | V\$NFAT.01        | Nuclear factor of activated T-cells                             | 476  | 494  | 485  | (+) | 0.966 | aaaaaaGGAaaaaaagag           |
| V\$ARID | AT rich interactive domain factor                   | V\$ARID5A.01      | AT rich interactive domain 5A (MRF1-like)                       | 689  | 709  | 699  | (+) | 0.966 | agglataATTTgtgtagtagt        |
| V\$RUSH | SWI/SNF related nucleophosphoproteins               | V\$SMARCA3.01     | SWI/SNF related, matrix associated, actin dependent regul       | 859  | 869  | 864  | (+) | 0.966 | ctCCATgtaat                  |
| V\$BPTF | Bromodomain and PHD domain transcript               | V\$FAC1.01        | Fetal Alz-50 clone 1 (FAC1)                                     | 1214 | 1224 | 1219 | (-) | 0.966 | aacataACAcA                  |
| V\$BRAC | Brachyury gene, mesoderm development                | V\$EOMES.02       | Eomesodermin, TBR-2 (secondary DNA binding preference           | 2372 | 2400 | 2386 | (-) | 0.966 | actcaggacaGGTGtgcctcaagtgagt |
| V\$HESF | Vertebrate homologues of enhancer of spl            | V\$DEC2.01        | Basic helix-loop-helix protein known as Dec2, Sharp1 or BH      | 7    | 21   | 14   | (+) | 0.965 | catgcaCATgtgtgt              |
| V\$RUSH | SWI/SNF related nucleophosphoproteins               | V\$SMARCA3.01     | SWI/SNF related, matrix associated, actin dependent regul       | 821  | 831  | 826  | (+) | 0.965 | ccACATataat                  |
| V\$MYBL | Cellular and viral myb-like transcriptional r       | V\$MYB2.02        | v-Myb                                                           | 934  | 954  | 944  | (+) | 0.965 | ctttgctcAACGgggttc           |
| V\$MYOD | Myoblast determining factors                        | V\$E47.02         | E47 homodimer                                                   | 2382 | 2398 | 2390 | (-) | 0.965 | tcaggacaGGTgtgcc             |
| V\$SATB | Special AT-rich sequence binding protein            | V\$SATB1.01       | Special AT-rich sequence-binding protein 1, predominantly       | 462  | 476  | 469  | (+) | 0.964 | aatAATAgtaaaaaa              |
| V\$SMAD | Vertebrate SMAD family of transcription fa          | V\$SMAD.01        | Sma- and Mad-related proteins                                   | 719  | 729  | 724  | (-) | 0.964 | ctgGTCtgcct                  |
| V\$OCT1 | Octamer binding protein                             | V\$OCT1.02        | Octamer-binding factor 1                                        | 1928 | 1942 | 1935 | (-) | 0.964 | ggtATGCaagagatg              |
| V\$EBOX | E-box binding factors                               | V\$ATF6.01        | Member of b-zip family, induced by ER damage/stress, bin        | 2161 | 2177 | 2169 | (+) | 0.964 | cctgCCACtctgtgta             |
| V\$MYT1 | MYT1 C2HC zinc finger protein                       | V\$MYT1L.01       | Myelin transcription factor 1-like, neuronal C2HC zinc finger   | 2343 | 2355 | 2349 | (+) | 0.964 | tgaaAGCTtgaa                 |
| V\$GREF | Glucocorticoid responsive and related ele           | V\$ARE.03         | Androgene receptor binding site, IR3 sites                      | 224  | 242  | 233  | (+) | 0.963 | caagcaccacatGTTCTca          |
| V\$MEF3 | MEF3 binding sites                                  | V\$SIX2.02        | Sine oculis homeobox homolog 2                                  | 1395 | 1407 | 1401 | (+) | 0.963 | agaTCAGctccc                 |
| V\$NDPK | Nucleoside diphosphate kinase                       | V\$NM23.01        | NME/NM23 nucleoside diphosphate kinase1 and 2                   | 314  | 330  | 322  | (+) | 0.962 | atGGGtgggggggagg             |
| O\$INRE | Core promoter initiator elements                    | O\$DINR.01        | Drosophila initiator motifs                                     | 1041 | 1051 | 1046 | (-) | 0.962 | tgTCATcttg                   |
| V\$MYBL | Cellular and viral myb-like transcriptional r       | V\$CMYB.02        | c-Myb, important in hematopoiesis, cellular equivalent to av    | 1763 | 1783 | 1773 | (-) | 0.962 | ccagagaacAAACtgctcctg        |
| V\$NF1F | Nuclear factor 1                                    | V\$NF1.03         | Non-palindromic nuclear factor I binding sites                  | 1777 | 1797 | 1787 | (-) | 0.962 | agtcggaatGCCAgaga            |
| V\$AP2F | Activator protein 2                                 | V\$AP2.02         | Activator protein 2 alpha                                       | 2025 | 2039 | 2032 | (+) | 0.962 | atgCCTtagggaaa               |
| V\$GATA | GATA binding factors                                | V\$GATA1.06       | Complex of Lmo2 bound to Tal-1, E2A proteins, and GATA          | 2055 | 2067 | 2061 | (-) | 0.962 | ttcaGATAgccat                |
| V\$CEBP | Ccoat/Enhancer Binding Protein                      | V\$CEBPA.01       | CCAAT/enhancer binding protein alpha                            | 909  | 923  | 916  | (-) | 0.961 | tggttgaGAAAgac               |
| V\$LTSM | Localized tandem sequence motif                     | V\$LTSM.03        | LTSM elements with 8 bp spacer                                  | 960  | 974  | 967  | (+) | 0.961 | ATCCgatgatcatct              |
| V\$NFAT | Nuclear factor of activated T-cells                 | V\$NFAT.01        | Nuclear factor of activated T-cells                             | 2122 | 2140 | 2131 | (-) | 0.961 | ccctatGGAaaaaatcaga          |
| V\$HOXF | Paralog hox genes 1-8 from the four hox c           | V\$NANOG.01       | Homeobox transcription factor Nanog                             | 2661 | 2679 | 2670 | (+) | 0.961 | taaaatGAATGtagctgg           |
| V\$AP4R | AP4 and related proteins                            | V\$AP4.03         | Activating enhancer binding protein 4                           | 885  | 901  | 893  | (-) | 0.96  | ctgtgcaGCTGtaaca             |
| V\$LTFM | Lactotransferrin motif                              | V\$LACTOFERRIN.01 | Lactotransferrin and delta-lactoferrin, growth-inhibiting prote | 1585 | 1593 | 1589 | (-) | 0.96  | gGCACtttc                    |
| V\$NF1F | Nuclear factor 1                                    | V\$NF1.03         | Non-palindromic nuclear factor I binding sites                  | 1897 | 1917 | 1907 | (-) | 0.96  | aatcctaattttGCCAagta         |
| V\$HOMF | Homeodomain transcription factors                   | V\$BARX2.01       | Barx2, homeobox transcription factor that preferentially bin    | 821  | 839  | 830  | (+) | 0.959 | ccacataTAATgtgtttaa          |
| V\$SORY | SOX/SRY-sex/testis determining and relat            | V\$SOX3.01        | SRY-box containing gene 3                                       | 1441 | 1463 | 1452 | (+) | 0.959 | ggtaaaaCAAAtgaaacagaaa       |
| V\$BCDF | Bicoid-like homeodomain transcription fac           | V\$CRX.01         | Cone-rod homeobox-containing transcription factor / otx-lik     | 1901 | 1917 | 1909 | (-) | 0.959 | aatcTAActtttgcca             |
| V\$EV11 | EV11-myleoid transforming protein                   | V\$EV11.07        | Evi-1 zinc finger protein, carboxy-terminal zinc finger doma    | 2064 | 2080 | 2072 | (+) | 0.959 | tgaaAGATgaccaca              |
| V\$ZTRE | Zinc transcriptional regulatory element             | V\$ZTRE.04        | 3' half site of ZTRE motif                                      | 2713 | 2729 | 2721 | (+) | 0.959 | tgGGAGtgagaaggtg             |
| V\$STAT | Signal transducer and activator of transcr          | V\$STAT3.02       | Signal transducer and activator of transcription 3              | 2817 | 2835 | 2826 | (+) | 0.959 | gattTTCcaggcctcaacag         |
| V\$MITF | Microphthalmia transcription factor                 | V\$MIT.01         | MIT (Microphthalmia transcription factor) and TFE3              | 227  | 241  | 234  | (-) | 0.958 | gagaaCATGtggtgc              |
| V\$ZF07 | C2H2 zinc finger transcription factors 7            | V\$ZNF263.01      | Zinc finger protein 263, ZKSCAN12 (zinc finger protein with     | 320  | 334  | 327  | (-) | 0.958 | gtcgccCTCCcccca              |
| V\$HOMF | Homeodomain transcription factors                   | V\$BARX2.01       | Barx2, homeobox transcription factor that preferentially bin    | 368  | 386  | 377  | (+) | 0.958 | gacaagtTAATgctgacag          |
| V\$EV11 | EV11-myleoid transforming protein                   | V\$EV11.07        | Evi-1 zinc finger protein, carboxy-terminal zinc finger doma    | 1483 | 1499 | 1491 | (+) | 0.958 | gagcaAAGATgaaat              |
| V\$HOMF | Homeodomain transcription factors                   | V\$BARX2.01       | Barx2, homeobox transcription factor that preferentially bin    | 2443 | 2461 | 2452 | (-) | 0.958 | gaataaTAATgattataa           |
| V\$BCDF | Bicoid-like homeodomain transcription fac           | V\$CRX.01         | Cone-rod homeobox-containing transcription factor / otx-lik     | 2484 | 2500 | 2492 | (-) | 0.958 | ttcctTAATcaacaaa             |
| V\$HOXF | Paralog hox genes 1-8 from the four hox c           | V\$NANOG.01       | Homeobox transcription factor Nanog                             | 369  | 387  | 378  | (+) | 0.957 | acaagtTAATGctgacagc          |
| V\$HOMF | Homeodomain transcription factors                   | V\$HHEX.01        | Hematopoietically expressed homeobox, proline-rich home         | 543  | 561  | 552  | (+) | 0.957 | ggcaagcattTAATatag           |
| V\$NKXH | NKX homeodomain factors                             | V\$NKX25.02       | Homeo domain factor Nkx-2.5/Csx, tinman homolog low aff         | 1487 | 1505 | 1496 | (-) | 0.957 | tgccTAAtttcatctt             |
| V\$NR2F | Nuclear receptor subfamily 2 factors                | V\$COUP.01        | Chicken ovalbumin upstream promoter 1 (COUP-TF1) and            | 1604 | 1628 | 1616 | (+) | 0.957 | gtcgcaaggccaaAGTcccagtcg     |
| V\$YY1F | Activator/repressor binding to transcription factor | V\$YY1.02         | Yin and Yang 1 repressor sites                                  | 855  | 877  | 866  | (+) | 0.956 | tttttCCATgtaataaccacaga      |
| V\$PERO | Peroxisome proliferator-activated recepto           | V\$PPARG.02       | Peroxisome proliferator-activated receptor gamma                | 1603 | 1625 | 1614 | (+) | 0.956 | agctgcaaggccAAAGtcccgca      |
| V\$ARID | AT rich interactive domain factor                   | V\$ARID5A.01      | AT rich interactive domain 5A (MRF1-like)                       | 682  | 702  | 692  | (-) | 0.955 | cacaaATATtaccTTTTTT          |
| V\$CHRF | Cell cycle regulators: Cell cycle homology          | V\$CHR.01         | Cell cycle gene homology region (CDE/CHR tandem eleme           | 1358 | 1370 | 1364 | (+) | 0.955 | ctaTTGAaacat                 |

|          |                                            |                |                                                                |      |      |      |     |       |                         |
|----------|--------------------------------------------|----------------|----------------------------------------------------------------|------|------|------|-----|-------|-------------------------|
| V\$CAAT  | CCAAT binding factors                      | V\$SNFY.04     | Nuclear factor Y (Y-box binding factor)                        | 1820 | 1834 | 1827 | (+) | 0.955 | gcacCCAATgagtga         |
| V\$MYOD  | Myoblast determining factors               | V\$MYOGENIN.03 | Myogenic bHLH protein myogenin (myf4)                          | 885  | 901  | 893  | (+) | 0.954 | tgctcaCAGCtgacaag       |
| V\$AP1R  | MAF and AP1 related factors                | V\$MAFA.01     | Lens-specific Mat/MafA-sites                                   | 1364 | 1388 | 1376 | (-) | 0.954 | cagctgtcgaatTCGAatgttc  |
| V\$STAT  | Signal transducer and activator of transcr | V\$STAT3.02    | Signal transducer and activator of transcription 3             | 1620 | 1638 | 1629 | (-) | 0.954 | galtCTCCcGGAAcaccggga   |
| V\$HAND  | Twist subfamily of class B bHLH transcrip  | V\$TH1E47.01   | Thing1/E47 heterodimer, TH1 bHLH member specific expr          | 2723 | 2743 | 2733 | (-) | 0.954 | ccatgacatCCAGacacccttc  |
| V\$SORY  | SOX/SRY-sex/testis determining and relat   | V\$SOX3.01     | SRY-box containing gene 3                                      | 613  | 635  | 624  | (+) | 0.953 | aacacaAAAATgcgggtgtgtgt |
| V\$SORY  | SOX/SRY-sex/testis determining and relat   | V\$HMGY.01     | HMG(Y) high-mobility-group protein I (Y), architectural tran   | 2037 | 2059 | 2048 | (+) | 0.953 | aaagAAT1Tgcggaagaatggcc |
| V\$GATA  | GATA binding factors                       | V\$GATA3.02    | GATA-binding factor 3                                          | 2850 | 2862 | 2856 | (+) | 0.953 | gggAGATcttacc           |
| V\$HAML  | Human acute myelogenous leukemia fact      | V\$AML2.01     | RUNX3 (Runt-related transcription factor 3), AML2 (Acute       | 429  | 443  | 436  | (+) | 0.952 | cgtGTGTgcctatgta        |
| V\$HOMF  | Homeodomain transcription factors          | V\$HHEX.01     | Hematopoietically expressed homeobox, proline-rich home        | 581  | 599  | 590  | (-) | 0.952 | gaaaacacattAATgaat      |
| V\$STAT  | Signal transducer and activator of transcr | V\$STAT5B.01   | Signal transducer and activator of transcription 5B            | 1405 | 1423 | 1414 | (+) | 0.952 | cccgatcccAGAAagctgt     |
| V\$ZF07  | C2H2 zinc finger transcription factors 7   | V\$ZNF263.02   | Zinc finger protein 263, ZKSCAN12 (zinc finger protein with    | 1527 | 1541 | 1534 | (+) | 0.952 | tgctcCTCCctttg          |
| V\$MYRF  | Myelin regulatory factors                  | V\$MYRF.01     | Myelin regulatory factor                                       | 2692 | 2704 | 2698 | (+) | 0.952 | atgtCCAGctca            |
| V\$CLOX  | CLOX and CLOX homology (CDP) factors       | V\$CDPCR3HD.01 | Cut-like homeodomain protein (Cut Repeat III / homeodoma       | 62   | 84   | 73   | (-) | 0.951 | ctatcatGATGgacatgtgggt  |
| V\$HOXF  | Paralog hox genes 1-8 from the four hox c  | V\$NANOG.01    | Homeobox transcription factor Nanog                            | 572  | 590  | 581  | (-) | 0.951 | ttaaatGATGtctactag      |
| V\$YY1F  | Activator/repressor binding to transcrip   | V\$YY1.02      | Yin and Yang 1 repressor sites                                 | 647  | 669  | 658  | (-) | 0.951 | tccttCCAATgttcaagttagt  |
| V\$SF1F  | Vertebrate steroidogenic factor            | V\$SF1.01      | SF1 steroidogenic factor 1                                     | 1604 | 1618 | 1611 | (+) | 0.951 | gctgCAAGgccaag          |
| V\$CLOX  | CLOX and CLOX homology (CDP) factors       | V\$CDPCR3HD.01 | Cut-like homeodomain protein (Cut Repeat III / homeodoma       | 2277 | 2299 | 2288 | (-) | 0.951 | agtaaatGATGaccaagaagcc  |
| V\$CHRF  | Cell cycle regulators: Cell cycle homology | V\$CHR.01      | Cell cycle gene homology region (CDE/CHR tandem eleme          | 2578 | 2590 | 2584 | (+) | 0.951 | aattTTGAattcc           |
| V\$FKHD  | Fork head domain factors                   | V\$FOXJ1.01    | Forkhead box J1                                                | 14   | 30   | 22   | (-) | 0.95  | ccgcaataAACAcacat       |
| V\$MYT1  | MYT1 C2HC zinc finger protein              | V\$MYT1L.01    | Myelin transcription factor 1-like, neuronal C2HC zinc finger  | 1414 | 1426 | 1420 | (+) | 0.95  | agaaAGCTgtatt           |
| V\$GATA  | GATA binding factors                       | V\$GATA3.02    | GATA-binding factor 3                                          | 1713 | 1725 | 1719 | (+) | 0.95  | aagAGATcagaaa           |
| V\$ZF02  | C2H2 zinc finger transcription factors 2   | V\$ZBP89.01    | Zinc finger transcription factor ZBP-89                        | 2838 | 2860 | 2849 | (-) | 0.95  | taagatcCCCCcacaacacac   |
| V\$ARID  | AT rich interactive domain factor          | V\$ARID5A.01   | AT rich interactive domain 5A (MRF1-like)                      | 1314 | 1334 | 1324 | (-) | 0.949 | tataaATATtatgaataac     |
| O\$VTBP  | Vertebrate TATA binding protein factor     | O\$VTATA.01    | Cellular and viral TATA box elements                           | 1321 | 1337 | 1329 | (-) | 0.949 | gtctATAAatattg          |
| V\$ARID  | AT rich interactive domain factor          | V\$ARID5A.01   | AT rich interactive domain 5A (MRF1-like)                      | 1321 | 1341 | 1331 | (+) | 0.949 | aataaATATtatgactact     |
| V\$LEFF  | LEF1/TCF                                   | V\$LEF1.02     | TCF/LEF-1, involved in the Wnt signal transduction pathwa      | 2696 | 2712 | 2704 | (+) | 0.949 | gccagctCAAGtataa        |
| V\$BRNF  | Brn POU domain factors                     | V\$TST1.01     | POU-factor Tst-1/Oct-6                                         | 85   | 103  | 94   | (+) | 0.948 | actggATTAAAagatgtg      |
| V\$P53F  | p53 tumor suppressor                       | V\$P53.02      | Tumor suppressor p53 (5' half site)                            | 1028 | 1052 | 1040 | (-) | 0.948 | gtgtcattctgagtCATGtccta |
| V\$HAND  | Twist subfamily of class B bHLH transcrip  | V\$TWIST.01    | Twist homolog of drosophila                                    | 223  | 243  | 233  | (-) | 0.947 | gtgagaaCATGTggtgtctgg   |
| V\$SORY  | SOX/SRY-sex/testis determining and relat   | V\$SOX3.01     | SRY-box containing gene 3                                      | 651  | 673  | 662  | (+) | 0.947 | acttgaCAAAtggtaaggataaa |
| V\$GREF  | Glucocorticoid responsive and related ele  | V\$ARE.02      | Androgene receptor binding site, IR3 sites                     | 1981 | 1999 | 1990 | (+) | 0.947 | attgttcttagTGTCcttg     |
| V\$SETSF | Human and murine ETS1 factors              | V\$FLI1.03     | Friend leukemia virus integration 1                            | 975  | 995  | 985  | (+) | 0.946 | aggtagcGGGAagggggataa   |
| V\$BHLH  | bHLH transcription factors expressed in n  | V\$MESP1_2.01  | Mesoderm posterior 1 and 2                                     | 1443 | 1455 | 1449 | (+) | 0.946 | taaaCAAAlgaaa           |
| V\$CEBP  | Ccoat/Enhancer Binding Protein             | V\$CEBPB.01    | CCAAT/enhancer binding protein beta                            | 2584 | 2598 | 2591 | (-) | 0.946 | agtgtttGGAAattc         |
| V\$MYT1  | MYT1 C2HC zinc finger protein              | V\$MYT1L.01    | Myelin transcription factor 1-like, neuronal C2HC zinc finger  | 197  | 209  | 203  | (-) | 0.945 | ggatAGTTTgctg           |
| V\$KLF5  | Kruppelt like transcription factors        | V\$KLF6.01     | Core promoter-binding protein (CPBP) with 3 Kruppelt-type      | 317  | 335  | 326  | (+) | 0.945 | gggtggGGGgagggcgacg     |
| V\$KLF5  | Kruppelt like transcription factors        | V\$BKLf.02     | Kruppelt-like factor 3 (basic)                                 | 319  | 337  | 328  | (+) | 0.945 | gtggggGGAGggcgacggg     |
| V\$SATB  | Special AT-rich sequence binding protein   | V\$SATB1.01    | Special AT-rich sequence-binding protein 1, predominantly      | 459  | 473  | 466  | (+) | 0.945 | tttAAATaatagtaaa        |
| V\$PBXC  | PBX - MEIS complexes                       | V\$PBX3.01     | Pre-B-cell leukemia homeobox 3                                 | 1511 | 1527 | 1519 | (+) | 0.945 | gaaatgagCGACtgggt       |
| V\$AP2F  | Activator protein 2                        | V\$TCFAP2A.01  | Ttranscription factor AP-2, alpha                              | 2025 | 2039 | 2032 | (-) | 0.945 | tttccctaAGGCCat         |
| V\$HAND  | Twist subfamily of class B bHLH transcrip  | V\$TH1E47.01   | Thing1/E47 heterodimer, TH1 bHLH member specific expr          | 2143 | 2163 | 2153 | (-) | 0.945 | aggctgatCCAGatctgcta    |
| V\$CDXF  | Vertebrate caudal related homeodomain p    | V\$CDX1.01     | Intestine specific homeodomain factor CDX-1                    | 2639 | 2657 | 2648 | (-) | 0.945 | gccatgtTTTAggaaggac     |
| V\$LTSM  | Localized tandem sequence motif            | V\$LTSM.02     | LTSM elements with 6 bp spacer                                 | 79   | 93   | 86   | (-) | 0.944 | taatccagctTATCa         |
| V\$AP2F  | Activator protein 2                        | V\$TCFAP2A.02  | Ttranscription factor AP-2, alpha                              | 1857 | 1871 | 1864 | (+) | 0.944 | aagaCCTGaggctgt         |
| V\$ARID  | AT rich interactive domain factor          | V\$ARID5A.01   | AT rich interactive domain 5A (MRF1-like)                      | 2467 | 2487 | 2477 | (+) | 0.944 | tttaATATtagtcaatttg     |
| V\$SORY  | SOX/SRY-sex/testis determining and relat   | V\$SOX3.01     | SRY-box containing gene 3                                      | 472  | 494  | 483  | (+) | 0.943 | aaaaaaaAAAggaaaaaaagag  |
| V\$HAML  | Human acute myelogenous leukemia fact      | V\$AML2.01     | RUNX3 (Runt-related transcription factor 3), AML2 (Acute       | 2069 | 2083 | 2076 | (-) | 0.943 | agaTGTGtcatctt          |
| V\$YY1F  | Activator/repressor binding to transcrip   | V\$YY1.02      | Yin and Yang 1 repressor sites                                 | 2640 | 2662 | 2651 | (-) | 0.943 | tgctgCCATgttttaggaagga  |
| O\$VTBP  | Vertebrate TATA binding protein factor     | O\$VTATA.02    | Mammalian C-type LTR TATA box                                  | 131  | 147  | 139  | (+) | 0.942 | agccaTAAAAatgatg        |
| V\$GATA  | GATA binding factors                       | V\$GATA1.04    | GATA-binding factor 1                                          | 333  | 345  | 339  | (+) | 0.942 | acggGATAcatt            |
| V\$XBBF  | X-box binding factors                      | V\$SRFX.01     | Regulatory factor X, 5 (influences HLA class II expression)    | 747  | 765  | 756  | (-) | 0.942 | agcttttAGCAactta        |
| V\$STAT  | Signal transducer and activator of transcr | V\$STAT5B.01   | Signal transducer and activator of transcription 5B            | 1033 | 1051 | 1042 | (+) | 0.942 | acatgactAGAAatgaca      |
| V\$SIX3  | Sine oculis homeobox homolog 3             | V\$SIX3.02     | SIX3 / SIXdomain (SD) and Homeodomain (HD) transcrip           | 1148 | 1168 | 1158 | (-) | 0.942 | ctgtctTAAAtaagcactc     |
| V\$SORY  | SOX/SRY-sex/testis determining and relat   | V\$HBP1.02     | HMG box-containing protein 1                                   | 1830 | 1852 | 1841 | (+) | 0.942 | agtgatgAATGaacaactaaaa  |
| V\$SF1F  | Vertebrate steroidogenic factor            | V\$FTF.02      | Alpha (1)-fetoprotein transcription factor (FTF), liver recept | 1989 | 2003 | 1996 | (-) | 0.942 | ctaccAAGGacacta         |
| V\$MEF3  | MEF3 binding sites                         | V\$SIX2.02     | Sine oculis homeobox homolog 2                                 | 2566 | 2578 | 2572 | (-) | 0.942 | tttTCAGattttta          |
| V\$IRXF  | Iroquois homeobox transcription factors    | V\$IRX5.01     | Iroquois homeobox 5                                            | 398  | 410  | 404  | (+) | 0.941 | ggcaCATGtatac           |
| V\$XBBF  | X-box binding factors                      | V\$SRFX.01     | Regulatory factor X, 5 (influences HLA class II expression)    | 947  | 965  | 956  | (-) | 0.94  | caggatccaaAGCAacccc     |
| V\$HOXF  | Paralog hox genes 1-8 from the four hox c  | V\$NANOG.01    | Homeobox transcription factor Nanog                            | 2684 | 2702 | 2693 | (+) | 0.94  | tggtgtAATGtaccagct      |
| V\$IRXF  | Iroquois homeobox transcription factors    | V\$IRX5.01     | Iroquois homeobox 5                                            | 397  | 409  | 403  | (-) | 0.939 | tataCATGtgcca           |
| V\$BHLH  | bHLH transcription factors expressed in n  | V\$MESP1_2.01  | Mesoderm posterior 1 and 2                                     | 507  | 519  | 513  | (+) | 0.939 | gactCATAtgtct           |
| V\$SORY  | SOX/SRY-sex/testis determining and relat   | V\$HBP1.02     | HMG box-containing protein 1                                   | 572  | 594  | 583  | (-) | 0.939 | cacattAATGaatgtctactag  |
| V\$E2F   | E2F-myc activator/cell cycle regulator     | V\$E2F.01      | E2F transcription factor 6                                     | 975  | 991  | 983  | (+) | 0.936 | aggtgCGGgaaggggg        |
| V\$SORY  | SOX/SRY-sex/testis determining and relat   | V\$HMGY.01     | HMG(Y) high-mobility-group protein I (Y), architectural tran   | 1004 | 1026 | 1015 | (-) | 0.936 | aagaaAAT1acatctcccttc   |
| V\$SETSF | Human and murine ETS1 factors              | V\$ERG.02      | v-ets erythroblastosis virus E26 oncogene homolog              | 1877 | 1897 | 1887 | (-) | 0.936 | aaagcaaaGAAagcatgtgag   |
| V\$CEBP  | Ccoat/Enhancer Binding Protein             | V\$CEBP.02     | CCAAT/enhancer binding protein                                 | 1245 | 1259 | 1252 | (-) | 0.935 | tgtttttGAAAgccc         |

|        |                                            |                   |                                                               |      |      |      |     |       |                             |
|--------|--------------------------------------------|-------------------|---------------------------------------------------------------|------|------|------|-----|-------|-----------------------------|
| VSEBOX | E-box binding factors                      | VSMYCMAX.02       | c-Myc/Max heterodimer                                         | 226  | 242  | 234  | (+) | 0.934 | agcacaaCACGTgctac           |
| VSCDXF | Vertebrate caudal related homeodomain p    | VSCDX2.03         | Caudal type homeobox transcription factor 2                   | 1322 | 1340 | 1331 | (+) | 0.934 | ataaatATATagactac           |
| VSNDPK | Nucleoside diphosphate kinase              | VSNM23.01         | NME/NM23 nucleoside diphosphate kinase1 and 2                 | 321  | 337  | 329  | (+) | 0.933 | ggGGGGgagggcgaggg           |
| VSLHXF | Lim homeodomain factors                    | VSLMX1A.02        | LIM homeobox transcription factor 1, alpha                    | 452  | 474  | 463  | (+) | 0.933 | cttaaaGTATAaataaglaaaa      |
| VSMEF2 | MEF2, myocyte-specific enhancer binding    | VVSL1.01          | Member of the RSRF (related to serum response factor) pr      | 454  | 476  | 465  | (-) | 0.933 | tttttaCTATtattaaactta       |
| VSETSF | Human and murine ETS1 factors              | VSERG.02          | v-ets erythroblastosis virus E26 oncogene homolog             | 588  | 608  | 598  | (-) | 0.933 | aaagagaaGGAAaacacattt       |
| VSETSF | Human and murine ETS1 factors              | VSERG.02          | v-ets erythroblastosis virus E26 oncogene homolog             | 636  | 656  | 646  | (+) | 0.933 | gggacacaGGAActaacttga       |
| VSNEUR | NeuroD, Beta2, HLH domain                  | VSNEUROG.01       | Neurogenin 1 and 3 (ngn1/3) binding sites                     | 652  | 666  | 659  | (-) | 0.933 | ttacCATtTgtcaag             |
| VSLHXF | Lim homeodomain factors                    | VSLMX1A.02        | LIM homeobox transcription factor 1, alpha                    | 1148 | 1170 | 1159 | (-) | 0.933 | ccctgctTATAaagagcactc       |
| VSHMTB | Human muscle-specific Mt binding site      | VSMTBF.01         | Muscle-specific Mt binding site                               | 1470 | 1478 | 1474 | (-) | 0.933 | tggtATCTa                   |
| VSETSF | Human and murine ETS1 factors              | VSFL1.02          | Friend leukemia virus integration 1                           | 1592 | 1612 | 1602 | (+) | 0.933 | ccctgcacGGAAgctgcaagg       |
| VSGREF | Glucocorticoid responsive and related ele  | VSARE.02          | Androgene receptor binding site, IR3 sites                    | 446  | 464  | 455  | (-) | 0.932 | attaacittaaGTTClag          |
| VSNKXH | NKX homeodomain factors                    | VSNKX31.01        | Prostate-specific homeodomain protein NKX3.1                  | 2288 | 2306 | 2297 | (-) | 0.932 | acagatAAGTaaattgatg         |
| VSPARF | PAR/bZIP family                            | VSTEF.01          | Thyrotrophic embryonic factor                                 | 2532 | 2548 | 2540 | (+) | 0.932 | attataatGTAAttta            |
| VSNFAT | Nuclear factor of activated T-cells        | VSNFAT5.02        | Nuclear factor of activated T-cells 5                         | 2810 | 2828 | 2819 | (-) | 0.932 | gcctGGAAaatcctctac          |
| VFAST  | FAST-1 SMAD interacting proteins           | VFAST1.01         | FAST-1 SMAD interacting protein                               | 14   | 30   | 22   | (+) | 0.931 | atgtgtgtTATTgccc            |
| VSLHXF | Lim homeodomain factors                    | VSLMX1A.02        | LIM homeobox transcription factor 1, alpha                    | 1487 | 1509 | 1498 | (-) | 0.931 | ccattgctTAAAttctcttt        |
| VSMYT1 | MYT1 C2HC zinc finger protein              | VSMYT1L01         | Myelin transcription factor 1-like, neuronal C2HC zinc finger | 1766 | 1778 | 1772 | (+) | 0.931 | ggacAGTTgttc                |
| VSMYT1 | MYT1 C2HC zinc finger protein              | VSMYT1L01         | Myelin transcription factor 1-like, neuronal C2HC zinc finger | 1877 | 1889 | 1883 | (-) | 0.931 | ggaaAGCTatgag               |
| VSGATA | GATA binding factors                       | VSGATA2.01        | GATA-binding factor 2                                         | 664  | 676  | 670  | (+) | 0.93  | taagGATAAaata               |
| VSSORY | SOX/SRY-sex/testis determining and relat   | VSSRY.01          | Sex-determining region Y gene product                         | 674  | 696  | 685  | (+) | 0.93  | ataaaACAaaaaaaaggtaata      |
| VSESRR | Estrogen-related receptors                 | VSESRR.03         | Estrogen-related receptor alpha                               | 1988 | 2010 | 1999 | (-) | 0.93  | cactgggtaccAAGGacacaa       |
| VSNKXH | NKX homeodomain factors                    | VSNKX31.01        | Prostate-specific homeodomain protein NKX3.1                  | 2432 | 2450 | 2441 | (-) | 0.93  | gattaaAGTatgtcaag           |
| VSETSF | Human and murine ETS1 factors              | VSFL1.03          | Friend leukemia virus integration 1                           | 2505 | 2525 | 2515 | (-) | 0.93  | actccccGGAAaggctcatg        |
| OSVTBP | Vertebrate TATA binding protein factor     | OSVTATA.01        | Cellular and viral TATA box elements                          | 2537 | 2553 | 2545 | (-) | 0.93  | cattataAAAttacatta          |
| VSABDB | Abdominal-B type homeodomain transcrip     | VSHOXC13.01       | Homeodomain transcription factor HOXC13                       | 1314 | 1330 | 1322 | (+) | 0.929 | gttattcaaTAAAtatt           |
| VSE2FF | E2F-myc activator/cell cycle regulator     | VSE2F6.01         | E2F transcription factor 6                                    | 1570 | 1586 | 1578 | (+) | 0.929 | gaagaCGCGaagcaga            |
| VSETSF | Human and murine ETS1 factors              | VSELF1.01         | E74-like factor 1                                             | 1649 | 1669 | 1659 | (+) | 0.929 | tgtgacacGGAaggctgggtg       |
| VSCHRF | Cell cycle regulators: Cell cycle homology | VSCHRF.01         | Cell cycle gene homology region (CDE/CHR tandem eleme         | 2183 | 2195 | 2189 | (+) | 0.929 | aagtTTGAagag                |
| VSETSF | Human and murine ETS1 factors              | VSPH1.04          | SPI-1 proto-oncogene, hematopoietic transcription factor P    | 281  | 301  | 291  | (+) | 0.928 | caggaagaGGAacctcacaca       |
| VSTHAP | THAP domain containing protein             | VSTHAP1.01        | THAP domain containing, apoptosis associated protein          | 537  | 547  | 542  | (+) | 0.928 | attacaGGCAa                 |
| VSABDB | Abdominal-B type homeodomain transcrip     | VSHOXD10.01       | Homeobox D10                                                  | 667  | 683  | 675  | (+) | 0.928 | ggataaaTAAAcacaa            |
| VSBRN  | Brn POU domain factors                     | VSBRN2.01         | Brn-2, POU-III protein class                                  | 2284 | 2302 | 2293 | (+) | 0.928 | tggtcatcaATTtacttat         |
| VSNR2F | Nuclear receptor subfamily 2 factors       | VSHNF4A.01        | Hepatic nuclear factor 4alpha, DR1 sites                      | 148  | 172  | 160  | (-) | 0.927 | catgtccctaCAAaggacatgaact   |
| VSMITF | Microphthalmia transcription factor        | VSMIT.01          | MIT (Microphthalmia transcription factor) and TFE3            | 396  | 410  | 403  | (-) | 0.927 | gtataCATgtccat              |
| VSBHLH | bHLH transcription factors expressed in n  | VSMESP1_2.01      | Mesoderm posterior 1 and 2                                    | 508  | 520  | 514  | (-) | 0.927 | tagaCATAlgagt               |
| VSHFAT | Heat shock factors                         | VSHSF1.05         | Heat shock factor 1                                           | 2589 | 2613 | 2601 | (+) | 0.927 | ccaaaacactgggctCAAGaattt    |
| VSKLFS | Kruppel like transcription factors         | VSKKLF.01         | Kidney-enriched kruppel-like factor, KLF15                    | 314  | 332  | 323  | (+) | 0.926 | atgggggtggGGGaggggcg        |
| VSTALE | TALE homeodomain class recognizing TG      | VSTGIF2LX.01      | TGFB-induced factor homeobox 2-like, X-linked, dimeric bli    | 887  | 903  | 895  | (+) | 0.926 | ttcacactGACAAggc            |
| VSCHRF | Cell cycle regulators: Cell cycle homology | VSCHRF.01         | Cell cycle gene homology region (CDE/CHR tandem eleme         | 1108 | 1120 | 1114 | (+) | 0.926 | acactTTGAactgg              |
| VSHNF6 | Onecut homeodomain factor HNF6             | VSHNF6.02         | Liver enriched Cut - Homeodomain transcription factor HNF6    | 67   | 83   | 75   | (+) | 0.925 | catgtccatCAATgata           |
| VSGREF | Glucocorticoid responsive and related ele  | VSGRE.02          | Glucocorticoid receptor, IR3 sites                            | 224  | 242  | 233  | (-) | 0.925 | tgaGAACatgtgtgcttg          |
| VSNEUR | NeuroD, Beta2, HLH domain                  | VSNEUROG.01       | Neurogenin 1 and 3 (ngn1/3) binding sites                     | 266  | 280  | 273  | (-) | 0.925 | tgtCCATgtgtctc              |
| VSCREB | cAMP-responsive element binding protein    | VSCREB1.02        | cAMP-responsive element binding protein 1                     | 492  | 512  | 502  | (-) | 0.925 | tgagtCTGAtgtcatcttctc       |
| VSNFAT | Nuclear factor of activated T-cells        | VSNFAT5.02        | Nuclear factor of activated T-cells 5                         | 1777 | 1795 | 1786 | (-) | 0.925 | tgctGGAaaatccagagaga        |
| VSP53F | p53 tumor suppressor                       | VSP53.02          | Tumor suppressor p53 (5' half site)                           | 137  | 161  | 149  | (+) | 0.924 | aaaaatggatgagttCATGtccttt   |
| VSGATA | GATA binding factors                       | VSGATA3.02        | GATA-binding factor 3                                         | 1486 | 1498 | 1492 | (+) | 0.924 | caaAGATgaaat                |
| VSTEM  | Motif composed of binding sites for plurip | VSOCT3_4.02       | POU domain, class 5, transcription factor 1                   | 1929 | 1947 | 1938 | (+) | 0.924 | atcctttGCATacctctcg         |
| VSNF1F | Nuclear factor 1                           | VSNF1.04          | Nuclear factor 1                                              | 50   | 70   | 60   | (-) | 0.923 | catgtgggtgggtCCAAGtc        |
| VSHOXH | HOX - MEIS1 heterodimers                   | VSMEIS1B_HOXA9.01 | Meis1b and Hoxa9 form heterodimeric binding complexes c       | 367  | 381  | 374  | (+) | 0.923 | TGACaaagttaatgcg            |
| VSP2F  | Activator protein 2                        | VSP2.02           | Activator protein 2 alpha                                     | 1857 | 1871 | 1864 | (-) | 0.923 | acaGCCtcaaggcttt            |
| VSMITF | Microphthalmia transcription factor        | VSMIT.01          | MIT (Microphthalmia transcription factor) and TFE3            | 1    | 15   | 8    | (-) | 0.922 | atgtGCATgtgtct              |
| VSBHLH | bHLH transcription factors expressed in n  | VSMESP1_2.01      | Mesoderm posterior 1 and 2                                    | 615  | 627  | 621  | (+) | 0.922 | cacaCAAAtgccc               |
| VSHOMF | Homeodomain transcription factors          | VSHMX3.02         | Hmx3/Nkx5-1 homeodomain transcription factor                  | 548  | 566  | 557  | (-) | 0.921 | agggaactataTAAatgcc         |
| VSMYOD | Myoblast determining factors               | VSMYOD.02         | Myogenic regulatory factor MyoD (myf3)                        | 886  | 902  | 894  | (-) | 0.921 | ccctgtCAGCtgtgaac           |
| VSP53F | p53 tumor suppressor                       | VSP53.03          | Tumor suppressor p53 (3' half site)                           | 61   | 85   | 73   | (-) | 0.92  | tctatcatgtatggaCATgtgggtt   |
| VSIKXF | Iroquois homeobox transcription factors    | VSIKXF5.01        | Iroquois homeobox 5                                           | 229  | 241  | 235  | (+) | 0.92  | accaCATGtctc                |
| VSLHXF | Lim homeodomain factors                    | VVSL2.01          | ISL LIM homeobox 2                                            | 574  | 596  | 585  | (+) | 0.92  | agtagacattcATTAAatgtgt      |
| VSPERO | Peroxisome proliferator-activated recepto  | VSPARG.02         | Peroxisome proliferator-activated receptor gamma              | 982  | 1004 | 993  | (+) | 0.92  | gggaagggggatAAAGgccagg      |
| VZGLIF | GLI zinc finger family                     | VZIC2.01          | Zinc finger transcription factor, Zic family member 2 (odd-p  | 1534 | 1550 | 1542 | (-) | 0.92  | ctaaccACCcAaaggga           |
| VSBAC  | Brachyury gene, mesoderm development       | VSTBX20.02        | T-box transcription factor TBX20                              | 1857 | 1885 | 1871 | (+) | 0.92  | aagacctgaggtggtGACActatagct |
| VSHOMF | Homeodomain transcription factors          | VSHMX3.02         | Hmx3/Nkx5-1 homeodomain transcription factor                  | 2703 | 2721 | 2712 | (-) | 0.92  | cactcccaTAAActttg           |
| VSIKXF | Iroquois homeobox transcription factors    | VSIKXF5.01        | Iroquois homeobox 5                                           | 228  | 240  | 234  | (-) | 0.919 | agaaCATGtgggt               |
| VSPARF | PAR/bZIP family                            | VSVBP.01          | PAR-type chicken vitellogenin promoter-binding protein        | 406  | 422  | 414  | (+) | 0.919 | tatacctatGTAAcaaa           |
| VSPARF | PAR/bZIP family                            | VSTEF.01          | Thyrotrophic embryonic factor                                 | 2520 | 2536 | 2528 | (+) | 0.919 | gggagttatATAAttta           |
| VSGATA | GATA binding factors                       | VSGATA3.02        | GATA-binding factor 3                                         | 2564 | 2576 | 2570 | (-) | 0.919 | ttcAGATttaag                |
| VSNBRE | NGF1-B response elements, nur subfamily    | VSNUR77.01        | Nuclear hormone receptor NUR77 (NR4A1)                        | 684  | 698  | 691  | (+) | 0.918 | aaaaaagGTAAttatt            |

|           |                                               |               |                                                               |      |      |      |     |       |                           |
|-----------|-----------------------------------------------|---------------|---------------------------------------------------------------|------|------|------|-----|-------|---------------------------|
| VSHNF1    | Hepatic Nuclear Factor 1                      | VSHMBOX.01    | Homeobox containing 1                                         | 2010 | 2026 | 2018 | (+) | 0.918 | gtcccctgGTTAaaaat         |
| VSHOXC    | HOX - PBX complexes                           | VSHOXC9.02    | Member of the vertebrate HOX - cluster of homeobox facto      | 2538 | 2554 | 2546 | (+) | 0.918 | aatgtaaTTTATAatgg         |
| VSHAND    | Twist subfamily of class B bHLH transcrip     | VSPARAXIS.01  | Paraxis (TCF15), member of the Twist subfamily of Class       | 224  | 244  | 234  | (+) | 0.917 | caagcACCACatgttctact      |
| VSFKHD    | Fork head domain factors                      | VSHNF3B.03    | Hepatic nuclear factor 3 beta (FOXA2)                         | 464  | 480  | 472  | (+) | 0.917 | taataagTAAAAAAaaa         |
| VSZF02    | C2H2 zinc finger transcription factors 2      | VSZNF219.01   | Kruppel-like zinc finger protein 219                          | 974  | 996  | 985  | (-) | 0.917 | ttatCCCcctcccgctactca     |
| VSNKX6    | NK6 homeobox transcription factors            | VSNKX61.01    | NK6 homeobox 1                                                | 1491 | 1505 | 1498 | (-) | 0.917 | tgccTTAAAttcat            |
| VSNF1F    | Nuclear factor 1                              | VSNFIB.01     | Nuclear factor I/B                                            | 1546 | 1566 | 1556 | (+) | 0.917 | gtaggggaagtcGCCAggca      |
| V\$ARID   | AT rich interactive domain factor             | V\$JARID2.01  | Jumonji, AT rich interactive domain 2 (JMJ)                   | 1837 | 1857 | 1847 | (-) | 0.917 | ttatcTTTAgttgttcatt       |
| VSHOXC    | HOX - PBX complexes                           | VSHOXC9.02    | Member of the vertebrate HOX - cluster of homeobox facto      | 2526 | 2542 | 2534 | (+) | 0.917 | tataataTTTATAatgt         |
| VSZF03    | C2H2 zinc finger transcription factors 3      | VSZNF217.01   | Zinc finger protein 217                                       | 183  | 195  | 189  | (-) | 0.916 | GAATgatgtgtgc             |
| VSMYRF    | Myelin regulatory factors                     | VSMYRF.01     | Myelin regulatory factor                                      | 561  | 573  | 567  | (-) | 0.916 | aggtaCCAGggagc            |
| V\$FKHD   | Fork head domain factors                      | V\$XFD2.01    | Xenopus fork head domain factor 2 (Foxl1a)                    | 1322 | 1338 | 1330 | (-) | 0.916 | agictaTAAAtatttat         |
| V\$GF11   | Growth factor independence transcription      | V\$GF11.02    | Growth factor independence 1                                  | 1790 | 1804 | 1797 | (-) | 0.916 | tgcaATCagtgctgg           |
| VSNFAT    | Nuclear factor of activated T-cells           | VSNFAT5.01    | Nuclear factor of activated T-cells 5                         | 2120 | 2138 | 2129 | (-) | 0.916 | ctatGGAaaaaatcagaat       |
| V\$ABDB   | Abdominal-B type homeodomain transcrip        | V\$HOXC9.01   | Homeobox C9 / Hox-3beta                                       | 2282 | 2298 | 2290 | (+) | 0.916 | cttggtcaTCAAttac          |
| OSVTPBP   | Vertebrate TATA binding protein factor        | OSVTATA.01    | Cellular and viral TATA box elements                          | 2525 | 2541 | 2533 | (-) | 0.916 | cattaTAAAtataaaa          |
| V\$ABDB   | Abdominal-B type homeodomain transcrip        | V\$HOXC13.01  | Homeodomain transcription factor HOXC13                       | 578  | 594  | 586  | (+) | 0.915 | gacatcattTAAAtgtg         |
| VSNKX6    | NK6 homeobox transcription factors            | VSNKX61.01    | NK6 homeobox 1                                                | 1152 | 1166 | 1159 | (-) | 0.915 | gtctTAAAtaagagc           |
| V\$SETSF  | Human and murine ETS1 factors                 | V\$SPI1.03    | SPI-1 proto-oncogene; hematopoietic transcription factor P    | 1502 | 1522 | 1512 | (+) | 0.915 | ggcaatggGGAAtgagcgac      |
| V\$HESF   | Vertebrate homologues of enhancer of spl      | V\$HELT.01    | Hey-like bHLH-transcriptional repressor                       | 1592 | 1606 | 1599 | (+) | 0.915 | cctgCACGggaagct           |
| V\$FKHD   | Fork head domain factors                      | V\$HNF3B.02   | Hepatic nuclear factor 3beta (FOXA2)                          | 2481 | 2497 | 2489 | (-) | 0.915 | cctaataCAAAcaaatg         |
| V\$BRNF   | Brn POU domain factors                        | V\$BRN3.01    | Brn-3, POU-IV protein class                                   | 2524 | 2542 | 2533 | (-) | 0.915 | acattataaATTAtaac         |
| V\$ZF02   | C2H2 zinc finger transcription factors 2      | V\$ZBTB7.03   | Zinc finger and BTB domain containing 7A, pokemon             | 314  | 336  | 325  | (-) | 0.914 | ccgtgGCCCTcccccccccatt    |
| VSHOXC    | HOX - PBX complexes                           | VSHOXC9.02    | Member of the vertebrate HOX - cluster of homeobox facto      | 2448 | 2464 | 2456 | (+) | 0.914 | atcattaTTTAttccat         |
| VSNKX6    | NK6 homeobox transcription factors            | VSNKX63.01    | NK6 homeobox 3                                                | 579  | 593  | 586  | (-) | 0.913 | acattTAAAtaagt            |
| V\$FKHL16 | Fork head domain factors                      | V\$FOX1.01    | Forkhead box protein M1                                       | 1864 | 1880 | 1872 | (-) | 0.913 | AgaTgGAcT                 |
| VSNKX6    | NK6 homeobox transcription factors            | VSNKX61.01    | NK6 homeobox 1                                                | 456  | 470  | 463  | (+) | 0.912 | aagtTAAAtaagt             |
| V\$CART   | Cart-1 (cartilage homeoprotein 1)             | V\$PHOX2.01   | Phox2a (ARIX) and Phox2b                                      | 508  | 528  | 518  | (-) | 0.912 | tctccTAAAtgacatagat       |
| V\$P53F   | p53 tumor suppressor                          | V\$TP63.02    | Tumor protein p63                                             | 637  | 661  | 649  | (+) | 0.912 | ggcacacggaagctaaCTTGacaat |
| V\$ZF07   | C2H2 zinc finger transcription factors 7      | V\$ZNF263.02  | Zinc finger protein 263, ZKSCAN12 (zinc finger protein with   | 1004 | 1018 | 1011 | (-) | 0.912 | tacatcCTCCctcc            |
| V\$GF11   | Growth factor independence transcription      | V\$GF11.02    | Growth factor independence 1                                  | 1075 | 1089 | 1082 | (+) | 0.912 | ccaAATCcatgctgt           |
| V\$GF11   | Growth factor independence transcription      | V\$GF11.02    | Growth factor independence 1                                  | 2353 | 2367 | 2360 | (-) | 0.912 | aaaAATCtiagtttc           |
| OSPTBP    | Plant TATA binding protein factor             | OSPTATA.02    | Plant TATA box                                                | 2540 | 2554 | 2547 | (-) | 0.912 | ccatTATAattaca            |
| V\$LHXF   | Lim homeodomain factors                       | V\$LIMX1B.01  | LIM-homeodomain transcription factor                          | 448  | 470  | 459  | (+) | 0.911 | agaactaaagTAAAtaagt       |
| V\$KLF5   | Kruppel like transcription factors            | V\$EKL.01     | Erythroid kruppel like factor (EKL)                           | 2506 | 2524 | 2515 | (-) | 0.911 | ctccccgggaGGGTctat        |
| V\$BHLH   | bHLH transcription factors expressed in n     | V\$MESP1_2.01 | Mesoderm posterior 1 and 2                                    | 279  | 279  | 273  | (+) | 0.91  | agaaCACAtggac             |
| V\$MEF2   | MEF2, myocyte-specific enhancer binding       | V\$SL1.01     | Member of the RSRF (related to serum response factor) pr      | 1320 | 1342 | 1331 | (-) | 0.91  | aagtagCTTAAatatttttg      |
| V\$HNF6   | Onecut homeodomain factor HNF6                | V\$HNF6.02    | Liver enriched Cut - Homeodomain transcription factor HNF     | 2282 | 2298 | 2290 | (+) | 0.91  | cttggtcATCAAttac          |
| V\$DLXF   | Distal-less homeodomain transcription fac     | V\$DLX1.01    | DLX-1, -2, and -5 binding sites                               | 2521 | 2539 | 2530 | (+) | 0.91  | ggagtatataATAataa         |
| V\$TEAF   | TEA/ATTS DNA binding domain factors           | V\$TEAD.01    | TEA domain-containing factors, transcriptional enhancer fa    | 1831 | 1843 | 1837 | (-) | 0.908 | gittCAATcatcac            |
| V\$LEFF   | LEF1/TCF                                      | V\$LEF1.01    | TCF/LEF-1, involved in the Wnt signal transduction pathwa     | 1884 | 1900 | 1892 | (-) | 0.908 | agtaaaGCAAAggaag          |
| V\$TALE   | TALE homeodomain class recognizing TG         | V\$TGIF2LX.01 | TGFB-induced factor homeobox 2-like, X-linked, dimeric bi     | 2383 | 2399 | 2391 | (+) | 0.908 | gcaacacctGTCctgag         |
| V\$TALE   | TALE homeodomain class recognizing TG         | V\$TGIF2LX.01 | TGFB-induced factor homeobox 2-like, X-linked, dimeric bi     | 2673 | 2689 | 2681 | (-) | 0.908 | accacaactGCCAgctc         |
| V\$PEG3   | Imprinted transcription factor PEG3           | V\$PEG3.01    | Paternally expressed 3                                        | 780  | 794  | 787  | (-) | 0.907 | cagtaacctTGCCT            |
| VSNF1F    | Nuclear factor 1                              | VSNFIB.01     | Nuclear factor I/B                                            | 985  | 1005 | 995  | (+) | 0.907 | aaggggataaagGCCAgggg      |
| V\$SETSF  | Human and murine ETS1 factors                 | V\$SPI1.03    | SPI-1 proto-oncogene; hematopoietic transcription factor P    | 1543 | 1563 | 1553 | (+) | 0.907 | gtggttagGGAAtgcagccag     |
| V\$AP1F   | AP1, Activating protein 1                     | V\$AP1.02     | Activator protein 1                                           | 1825 | 1837 | 1831 | (+) | 0.907 | caatGAGTgatga             |
| V\$MYBL   | Cellular and viral myb-like transcriptional r | V\$SCMYB.01   | c-Myb, important in hematopoiesis, cellular equivalent to avi | 795  | 815  | 805  | (-) | 0.906 | tcttagttaCAACagctaggc     |
| V\$ZF03   | C2H2 zinc finger transcription factors 3      | V\$ZNF217.01  | Zinc finger protein 217                                       | 26   | 38   | 32   | (-) | 0.905 | GAATAgtgccgca             |
| V\$IRRF   | Interferon regulatory factors                 | V\$ISRE.02    | Interferon-stimulated response element                        | 480  | 504  | 492  | (+) | 0.905 | aaggaaaaaaagaGAAAtgacat   |
| V\$PAX6   | PAX-4/PAX-6 paired domain binding sites       | V\$PAX6.04    | PAX6 paired domain binding site                               | 2034 | 2052 | 2043 | (-) | 0.905 | tttCCGCaatttttccc         |
| V\$OCT1   | Octamer binding protein                       | V\$OCT1.05    | Octamer-binding factor 1                                      | 2430 | 2444 | 2437 | (+) | 0.905 | gaCATGaaactact            |
| V\$EVI1   | EVI1-myleoid transforming protein             | V\$EVI1.07    | Evi-1 zinc finger protein, carboxy-terminal zinc finger doma  | 91   | 107  | 99   | (+) | 0.904 | ttaaaAAGAtggtggcac        |
| V\$MYC    | E-box binding factors                         | V\$MYC.03     | c-Myc                                                         | 960  | 1019 | 967  | (-) | 0.904 | tgccCACGTG                |
| V\$MAZF   | Myc associated zinc fingers                   | V\$MAZR.01    | MYC-associated zinc finger protein related transcription fac  | 315  | 327  | 321  | (+) | 0.904 | tggggtGGGGgga             |
| V\$PARF   | PAR/bZIP family                               | V\$VBP.01     | PAR-type chicken vitellogenin promoter-binding protein        | 353  | 369  | 361  | (+) | 0.904 | acacctaatGTAAatga         |
| V\$ZF03   | C2H2 zinc finger transcription factors 3      | V\$ZNF217.01  | Zinc finger protein 217                                       | 877  | 889  | 883  | (-) | 0.904 | GAAACagtttact             |
| V\$DMRT   | DM domain-containing transcription factor     | V\$DMRT4.01   | Doublesex and mab-3 related transcription factor 4            | 1357 | 1377 | 1367 | (+) | 0.904 | actattgaAACAttgcagat      |
| V\$MYBL   | Cellular and viral myb-like transcriptional r | V\$SCMYB.01   | c-Myb, important in hematopoiesis, cellular equivalent to avi | 2100 | 2120 | 2110 | (+) | 0.904 | tattctgttCAACagctcca      |
| V\$ABDB   | Abdominal-B type homeodomain transcrip        | V\$HOXB9.01   | Abd-B-like homeodomain protein Hoxb-9                         | 2779 | 2795 | 2787 | (+) | 0.904 | tgagatggTAAAtgtg          |
| V\$BRNF   | Brn POU domain factors                        | V\$TST1.01    | POU-factor Tst-1/Oct-6                                        | 365  | 383  | 374  | (-) | 0.903 | tacgcATTAActgttcatt       |
| V\$DMRT   | DM domain-containing transcription factor     | V\$DMRT3.01   | Doublesex and mab-3 related transcription factor 3            | 406  | 426  | 416  | (-) | 0.903 | caggttgtTACAtaggtata      |
| V\$MYT1   | MYT1 C2HC zinc finger protein                 | V\$MYT1.02    | MyT1 zinc finger transcription factor involved in primary ne  | 765  | 777  | 771  | (-) | 0.903 | cagAAGTttttaa             |
| V\$NOLF   | Neuron-specific olfactory factor              | V\$EBF1.01    | Early B-cell factor 1                                         | 2507 | 2529 | 2518 | (-) | 0.903 | tataacTCCCctggagggtcta    |
| OSPTBP    | Plant TATA binding protein factor             | OSPTATA.02    | Plant TATA box                                                | 2528 | 2542 | 2535 | (-) | 0.903 | acattTATAaattata          |
| V\$SORY   | SOX/SRY-sex/testis determining and relat      | V\$SOX7.01    | SRY-related HMG-box gene 7                                    | 34   | 56   | 45   | (+) | 0.902 | tattcACAAtagcaagactgg     |
| V\$BRNF   | Brn POU domain factors                        | V\$TST1.01    | POU-factor Tst-1/Oct-6                                        | 829  | 847  | 838  | (+) | 0.902 | aatggTTTAAaaatgggg        |

|          |                                                   |               |                                                                 |      |      |      |     |       |                              |
|----------|---------------------------------------------------|---------------|-----------------------------------------------------------------|------|------|------|-----|-------|------------------------------|
| OSVTBP   | Vertebrate TATA binding protein factor            | OSVTATA.01    | Cellular and viral TATA box elements                            | 2518 | 2534 | 2526 | (-) | 0.902 | aattaTATAactccct             |
| VSPARF   | PAR/bZIP family                                   | VSVBP.01      | PAR-type chicken vitellogenin promoter-binding protein          | 2521 | 2537 | 2529 | (+) | 0.902 | ataaattATAAactcc             |
| VSABDB   | Abdominal-B type homeodomain transcription factor | VSHOXB9.01    | Abd-B-like homeodomain protein Hoxb-9                           | 2528 | 2574 | 2566 | (+) | 0.902 | atactctTAAActctg             |
| VSLEFF   | LEF1/TCF                                          | VSLEF1.04     | TCF/LEF-1 (secondary DNA binding preference)                    | 69   | 85   | 77   | (+) | 0.901 | tgccaTCAAtgataga             |
| VFAST    | FAST-1 SMAD interacting proteins                  | VFAST1.01     | FAST-1 SMAD interacting protein                                 | 510  | 526  | 518  | (+) | 0.901 | tcattgtcTATTtagga            |
| VSGF1    | Growth factor independence transcription factor   | VSGF11.02     | Growth factor independence 1                                    | 525  | 539  | 532  | (+) | 0.901 | gagAATCaagattg               |
| VSOCT1   | Octamer binding protein                           | VSOCT1.04     | Octamer-binding factor 1                                        | 922  | 936  | 929  | (-) | 0.901 | aaGATGgaatcctg               |
| VSHMTB   | Human muscle-specific Mt binding site             | VSMTBF.01     | Muscle-specific Mt binding site                                 | 1206 | 1214 | 1210 | (-) | 0.901 | aggATGTG                     |
| VSCBEP   | Ccoaat/Enhancer Binding Protein                   | VSCBEP.G0     | CCAAT/enhancer binding protein (C/EBP), gamma                   | 2040 | 2054 | 2047 | (+) | 0.901 | gaatTTGCGgaaag               |
| VSPAX5   | PAX-2/5/8 binding sites                           | VSPAX8.01     | PAX 2/5/8 binding site                                          | 2417 | 2445 | 2431 | (+) | 0.901 | ggaaggaaacTTGAcatgaaactactta |
| VSNR2F   | Nuclear receptor subfamily 2 factors              | VSHNF4A.03    | Hepatic nuclear factor 4alpha homodimer, DR1 sites (spec)       | 2614 | 2638 | 2626 | (-) | 0.901 | agtaatgttcacaGTCCttatcc      |
| VSPLZF   | C2H2 zinc finger protein PLZF                     | VSPLZF.01     | Promyelocytic leukemia zinc finger (TF with nine Krueppel-      | 451  | 465  | 458  | (+) | 0.9   | actTAAAGtttaata              |
| VSEVI1   | EV11-myleoid transforming protein                 | VSEVI1.07     | Evi-1 zinc finger protein, carboxy-terminal zinc finger doma    | 835  | 851  | 843  | (+) | 0.9   | ttaaaAAGAtggaggatt           |
| VSGCMF   | Chorion-specific transcription factors with       | VSGCM1.03     | Glial cells missing homolog 1 (secondary DNA binding pref       | 1698 | 1712 | 1705 | (-) | 0.9   | ctctcCCCTataaac              |
| VBRAC    | Brachyury gene, mesoderm development              | VSEOMES.02    | Eomesodermin, TBR-2 (secondary DNA binding preference)          | 2716 | 2744 | 2730 | (+) | 0.899 | ggagtgagaaGGTgtctgtagtcatgga |
| VSIIRXF  | Iroquois homeobox transcription factors           | VSIIRX5.01    | Iroquois homeobox 5                                             | 63   | 75   | 69   | (+) | 0.898 | cccaCATGtccat                |
| VSLGLI   | GLI zinc finger family                            | VSLGLI53.01   | GLIS family zinc finger 3, Gli-similar 3                        | 314  | 330  | 322  | (-) | 0.898 | ccctCCGCCcaccacct            |
| VSMYT1   | MYT1 C2HC zinc finger protein                     | VSMYT1.01     | MyT1 zinc finger transcription factor involved in primary ne    | 877  | 889  | 883  | (-) | 0.898 | gaaCAGTttact                 |
| VFAST    | FAST-1 SMAD interacting proteins                  | VFAST1.01     | FAST-1 SMAD interacting protein                                 | 2091 | 2107 | 2099 | (+) | 0.898 | ggctttgtcTATTctgt            |
| VSBRN3   | Brn POU domain factors                            | VSBRN3.02     | Brn-3, POU-IV protein class                                     | 2439 | 2457 | 2448 | (+) | 0.898 | ctacttaTAActatttt            |
| VSKLFS   | Kruppel like transcription factors                | VSKLFS.01     | Gut-enriched Krueppel-like factor                               | 471  | 489  | 480  | (+) | 0.897 | aaaaaaaaAAGGaaaaaa           |
| VSOCT1   | Octamer binding protein                           | VSOCT1.04     | Octamer-binding factor 1                                        | 1488 | 1502 | 1495 | (+) | 0.897 | aaGATGaaaattgaag             |
| VSIIRXF  | Iroquois homeobox transcription factors           | VSIIRX5.01    | Iroquois homeobox 5                                             | 8    | 20   | 14   | (-) | 0.896 | cacaCATGtgcac                |
| VSBNCF   | Basonuclin rDNA transcription factor (Po          | VSBNC.01      | Basonuclin, cooperates with UBF1 in rDNA PolI transcriptio      | 209  | 227  | 218  | (-) | 0.896 | cttggtattTTGTCCcttg          |
| V\$XBBF  | X-box binding factors                             | V\$RFX1.01    | X-box binding protein RFX1                                      | 633  | 651  | 642  | (+) | 0.896 | tggtggacacaGGAActaa          |
| VSNOLF   | Neuron-specific olfactory factor                  | VSNOLF.02     | Olfactory neuron-specific factor                                | 2021 | 2043 | 2032 | (-) | 0.896 | attcTTCCtaaggccatttt         |
| VSIIRXF  | Iroquois homeobox transcription factors           | VSIIRX5.01    | Iroquois homeobox 5                                             | 62   | 74   | 68   | (-) | 0.895 | tggaCATGtggtt                |
| V\$AP1R  | MAF and AP1 related factors                       | V\$BACH2.02   | BTB and CNC homology 1, basic leucine zipper transcrip          | 1037 | 1061 | 1049 | (-) | 0.895 | gaatgagcTGTGtctattctgagtc    |
| VSMYT1   | MYT1 C2HC zinc finger protein                     | VSMYT1.02     | MyT1 zinc finger transcription factor involved in primary ne    | 1233 | 1245 | 1239 | (-) | 0.895 | ctgAAGTtttaga                |
| V\$FKHD  | Fork head domain factors                          | V\$FOXJ1.01   | Forkhead box J1                                                 | 1802 | 1818 | 1810 | (+) | 0.895 | gcattgtaCACAAagta            |
| V\$ARID  | AT rich interactive domain factor                 | V\$JARID2.01  | Jumonji, AT rich interactive domain 2 (JMj)                     | 2478 | 2498 | 2488 | (+) | 0.895 | gtgcattTTGtttgattagga        |
| VSPLZF   | C2H2 zinc finger protein PLZF                     | VSPLZF.02     | Promyelocytic leukemia zinc finger (TF with nine Krueppel-      | 118  | 132  | 125  | (-) | 0.894 | ctgTACAggtattcca             |
| V\$HAND  | Twist subfamily of class B bHLH transcrip         | V\$PARAXIS.01 | Paraxis (TCF15), member of the Twist subfamily of Class         | 2624 | 284  | 274  | (+) | 0.894 | atgagtgatAATGaacaaacta       |
| V\$IRFF  | Interferon regulatory factors                     | V\$IRF7.01    | Interferon regulatory factor 7 (IRF-7)                          | 1571 | 1595 | 1583 | (+) | 0.894 | aagagcggAAGcagaaagtcctg      |
| V\$HAND  | Twist subfamily of class B bHLH transcrip         | V\$PARAXIS.01 | Paraxis (TCF15), member of the Twist subfamily of Class         | 2380 | 2400 | 2390 | (+) | 0.894 | gaggcAACAcctgtcctgagt        |
| V\$SORY  | SOX/SRY-sex/testis determining and relat          | V\$HBP1.01    | HMG box-containing protein 1                                    | 2660 | 2682 | 2671 | (+) | 0.894 | ctaaatgAATGTgagcctgacag      |
| V\$GREF  | Glucocorticoid responsive and related ele         | V\$PRE.01     | Progesterone receptor binding site, IR3 sites                   | 265  | 283  | 274  | (-) | 0.893 | ctgtgtccatgTGTtctca          |
| VSKLFS   | Kruppel like transcription factors                | VSEKLF.01     | Erythroid krueppel like factor (EKLF)                           | 1633 | 1651 | 1642 | (+) | 0.893 | aaagcttggaGGGTgtg            |
| VSKLFS   | Kruppel like transcription factors                | VSEKLF.01     | Erythroid krueppel like factor (EKLF)                           | 2764 | 2782 | 2773 | (-) | 0.893 | ctcaccacaaaGGGTgaa           |
| VSOCT1   | Octamer binding protein                           | VSOCT1.06     | Octamer-binding factor 1                                        | 1011 | 1025 | 1018 | (+) | 0.892 | aggatgtaAATTtct              |
| V\$HNF6  | Onecut homeodomain factor HNF6                    | V\$HNF6.02    | Liver enriched Cut - Homeodomain transcription factor HNF       | 1072 | 1088 | 1080 | (+) | 0.892 | tgaccacaatCCATGctg           |
| V\$NKX3  | NKX homeodomain factors                           | V\$NKX3.01    | Prostate-specific homeodomain protein NKX3.1                    | 1330 | 1348 | 1339 | (-) | 0.892 | catagAAGTagtctataa           |
| V\$IRFF  | Interferon regulatory factors                     | V\$ISRE.02    | Interferon-stimulated response element                          | 1446 | 1470 | 1458 | (+) | 0.892 | acaatgaaaaacaGAAcaacagt      |
| V\$SP1F  | GC-Box factors SP1/GC                             | V\$GC.01      | GC box elements                                                 | 1526 | 1542 | 1534 | (-) | 0.892 | ccaaagGGAGgagccac            |
| V\$SORY  | SOX/SRY-sex/testis determining and relat          | V\$HMGA.01    | HMGA family of architectural transcription factors (HMGA1       | 1827 | 1849 | 1838 | (+) | 0.892 | atgagtgatAATGaacaaacta       |
| V\$STAT  | Signal transducer and activator of transcr        | V\$STAT.01    | Signal transducers and activators of transcription              | 2637 | 2655 | 2646 | (-) | 0.892 | catgttttaGAAggagac           |
| VSIIRXF  | Iroquois homeobox transcription factors           | VSIIRX5.01    | Iroquois homeobox 5                                             | 9    | 21   | 15   | (+) | 0.891 | tgcaCATGtgtgt                |
| V\$HOXF  | Paralog hox genes 1-8 from the four hox c         | V\$HOBX8.01   | Homeobox B8 / Hox-2delta                                        | 14   | 32   | 23   | (-) | 0.891 | tgccgcaATAAacacacat          |
| V\$SP1F  | GC-Box factors SP1/GC                             | V\$SP1.01     | Stimulating protein 1, ubiquitous zinc finger transcription fac | 319  | 335  | 327  | (+) | 0.891 | gtggGGAGgagccac              |
| V\$BARB  | Barbiturate-inducible element box from pro        | V\$BARBIE.01  | Barbiturate-inducible element                                   | 835  | 849  | 842  | (+) | 0.891 | ttaaAAAGatgggg               |
| V\$FKHD  | Fork head domain factors                          | V\$FOXO1.01   | Forkhead box protein O1                                         | 880  | 896  | 888  | (-) | 0.891 | cagctgtgAACAgttta            |
| V\$MYOD  | Myoblast determining factors                      | V\$MYOD.01    | Myogenic regulatory factor MyoD (myf3)                          | 2674 | 2690 | 2682 | (+) | 0.891 | agctGGCAGgttggtt             |
| V\$SP1F  | GC-Box factors SP1/GC                             | V\$GC.01      | GC box elements                                                 | 312  | 328  | 320  | (+) | 0.89  | tcattggGTGgggggag            |
| V\$EGRF  | EGR/nerve growth factor induced protein           | V\$EGFR1.04   | EGR1, early growth response 1                                   | 313  | 331  | 322  | (+) | 0.89  | catgggtgGGGGggggc            |
| V\$NOLF  | Neuron-specific olfactory factor                  | V\$EBF1.01    | Early B-cell factor 1                                           | 2005 | 2027 | 2016 | (+) | 0.89  | ccaggtTCCctgttaaaaatg        |
| V\$GREF  | Glucocorticoid responsive and related ele         | V\$ARE.02     | Androgene receptor binding site, IR3 sites                      | 2851 | 2869 | 2860 | (+) | 0.89  | ggagatctacgGTGCTcc           |
| V\$PLAG  | Pleomorphic adenoma gene                          | V\$PLAG1.01   | Pleomorphic adenoma gene (PLAG) 1, a developmentally r          | 302  | 324  | 313  | (+) | 0.889 | ccGGGcctgtcatgggggtggg       |
| V\$HOXC  | HOX - PBX complexes                               | V\$MEIS1.03   | Meis homeobox 1                                                 | 1671 | 1687 | 1679 | (+) | 0.889 | ggctgATTtagtggga             |
| V\$HNF1  | Hepatic Nuclear Factor 1                          | V\$HNF1.04    | Hepatocyte nuclear factor 1 alpha (Tcf-1)                       | 2391 | 2407 | 2399 | (+) | 0.889 | gtctctgaTTAactgt             |
| V\$NKRFB | Nuclear factor-kappaB repressing factor           | V\$NKRFB.01   | NFKB repressing factor (NRF)                                    | 1121 | 1131 | 1126 | (-) | 0.888 | aatTTCctlg                   |
| V\$LEFF  | LEF1/TCF                                          | V\$LEF1.01    | TCF/LEF-1, involved in the Wnt signal transduction pathwa       | 1263 | 1279 | 1271 | (+) | 0.888 | aaaaacaCAAagctaac            |
| V\$SORY  | SOX/SRY-sex/testis determining and relat          | V\$HMGA.01    | HMGA family of architectural transcription factors (HMGA1       | 366  | 388  | 377  | (+) | 0.887 | atgacaagtAATGctctacgca       |
| V\$IRFF  | Interferon regulatory factors                     | V\$IRF2.02    | Interferon regulatory factor 2                                  | 469  | 493  | 481  | (+) | 0.887 | gtaaaaaaaAAAaggaaaaaaaga     |
| V\$MYT1  | MYT1 C2HC zinc finger protein                     | V\$MYT1.02    | MyT1 zinc finger transcription factor involved in primary ne    | 2420 | 2432 | 2426 | (-) | 0.887 | gtcAAGTtttct                 |
| OSVTBP   | Vertebrate TATA binding protein factor            | OSLTATA.01    | Lentivirus LTR TATA box                                         | 2434 | 2450 | 2442 | (-) | 0.887 | gatTATAgtagtttca             |
| V\$CART  | Cart-1 (cartilage homeoprotein 1)                 | V\$CART1.01   | Cart-1 (cartilage homeoprotein 1)                               | 2532 | 2552 | 2542 | (+) | 0.887 | atttaTAAgtatttataat          |
| V\$PLZF  | C2H2 zinc finger protein PLZF                     | V\$PLZF.02    | Promyelocytic leukemia zinc finger (TF with nine Krueppel-      | 2803 | 2817 | 2810 | (+) | 0.887 | tgaTACAgtagggagg             |

|                                                    |                                                                |                  |                                                                        |      |      |      |     |       |                             |
|----------------------------------------------------|----------------------------------------------------------------|------------------|------------------------------------------------------------------------|------|------|------|-----|-------|-----------------------------|
| V\$AP1F                                            | AP1, Activating protein 1                                      | V\$AP1.02        | Activator protein 1                                                    | 237  | 249  | 243  | (-) | 0.886 | ctgtGAGTgagaa               |
| V\$CART                                            | Cart-1 (cartilage homeoprotein 1)                              | V\$PHOX2.01      | Phox2a (ARIX) and Phox2b                                               | 2480 | 2500 | 2490 | (-) | 0.886 | tcctcTAATcaacaaaatgc        |
| V\$NOLF                                            | Neuron-specific olfactory factor                               | V\$EBF1.01       | Early B-cell factor 1                                                  | 990  | 1012 | 1001 | (-) | 0.885 | ctcccTCCCctggcctttatcc      |
| O\$VTBP                                            | Vertebrate TATA binding protein factor                         | O\$LTATA.01      | Lentivirus LTR TATA box                                                | 1290 | 1306 | 1298 | (+) | 0.885 | aaaTATAAagcccaatt           |
| V\$HNF1                                            | Hepatic Nuclear Factor 1                                       | V\$HNF1.03       | Hepatic nuclear factor 1                                               | 1905 | 1921 | 1913 | (-) | 0.885 | ggTTAatcctaattctt           |
| V\$E2FF                                            | E2F-myc activator/cell cycle regulator                         | V\$E2F.02        | E2F, involved in cell cycle regulation, interacts with Rb p10          | 2041 | 2057 | 2049 | (+) | 0.885 | aatttggcgAAAAGatg           |
| V\$IRFF                                            | interferon regulatory factors                                  | V\$IRF7.01       | interferon regulatory factor 7 (IRF-7)                                 | 2573 | 2597 | 2585 | (-) | 0.885 | glttttgGAATtcaaaatttca      |
| V\$OCT1                                            | Octamer binding protein                                        | V\$OCT1.02       | Octamer-binding factor 1                                               | 2753 | 2767 | 2760 | (-) | 0.885 | gaaATGCaagtgttg             |
| V\$GREF                                            | Glucocorticoid responsive and related elements                 | V\$GRE.03        | Glucocorticoid receptor, IR3 sites                                     | 256  | 274  | 265  | (-) | 0.884 | tggttctcatGTTcaat           |
| V\$CART                                            | Cart-1 (cartilage homeoprotein 1)                              | V\$PHOX2.01      | Phox2a (ARIX) and Phox2b                                               | 353  | 373  | 363  | (+) | 0.884 | acaccTAATgtaaatgacaag       |
| V\$PARF                                            | PAR/bZIP family                                                | V\$VBP.01        | PAR-type chicken vitellogenin promoter-binding protein                 | 797  | 813  | 805  | (+) | 0.884 | ctagctgtGTAactaa            |
| V\$SRFF                                            | Serum response element binding factor                          | V\$SRF.02        | Serum response factor                                                  | 925  | 943  | 934  | (-) | 0.884 | ggagcCAAAGatggaaatc         |
| V\$GATA                                            | GATA binding factors                                           | V\$GATA1.07      | GATA-binding factor 1                                                  | 987  | 999  | 993  | (+) | 0.884 | ggggGATAAagcg               |
| V\$NKX6                                            | NK6 homeobox transcription factors                             | V\$NKX63.01      | NK6 homeobox 3                                                         | 2445 | 2459 | 2452 | (-) | 0.884 | ataaTAAAgattat              |
| V\$SETSF                                           | Human and murine ETS1 factors                                  | V\$SPIB.01       | Spi-B transcription factor (Spi-1/PU.1 related)                        | 2450 | 2470 | 2460 | (-) | 0.884 | taaaaaaTGAAATAaataatg       |
| V\$SRFF                                            | Serum response element binding factor                          | V\$SRF.04        | Serum response factor                                                  | 926  | 944  | 935  | (+) | 0.883 | atttcctcTTTGctcca           |
| V\$MYOD                                            | Myoblast determining factors                                   | V\$MYOD.01       | Myogenic regulatory factor MyoD (myf3)                                 | 1722 | 1738 | 1730 | (+) | 0.883 | gaaGGCAGctgggaagc           |
| V\$NKXH                                            | NKX homeodomain factors                                        | V\$NKX25.02      | Homeo domain factor Nkx-2.5/Csx, tinman homolog low affinity           | 2316 | 2334 | 2325 | (+) | 0.883 | aaccaTAActgtcatgac          |
| V\$BRNF                                            | Brn POU domain factors                                         | V\$BRN2.01       | Brn-2, POU-III protein class                                           | 2537 | 2555 | 2546 | (-) | 0.883 | cccATTataaattacatta         |
| V\$GCMF                                            | Chorion-specific transcription factors with GATA binding sites | V\$GCM1.02       | Glial cells missing homolog 1                                          | 58   | 72   | 65   | (+) | 0.882 | accacCCCAcatgc              |
| V\$MYBL                                            | Cellular and viral myb-like transcriptional repressors         | V\$MYB.01        | v-Myb                                                                  | 1446 | 1466 | 1456 | (+) | 0.882 | acaatgaaaAACAgaaacaa        |
| V\$MYBL                                            | Cellular and viral myb-like transcriptional repressors         | V\$VMYB.01       | v-Myb                                                                  | 1455 | 1475 | 1465 | (+) | 0.882 | aaacagaacAACAgtagata        |
| V\$GLIF                                            | GLI zinc finger family                                         | V\$GLI3.02       | GLI-Kruppel family member GLI3                                         | 1517 | 1533 | 1525 | (-) | 0.882 | ggagCCACccagctcgt           |
| V\$MYT1                                            | MYT1 C2HC zinc finger protein                                  | V\$MYT1.02       | MyT1 zinc finger transcription factor involved in primary neurogenesis | 2702 | 2714 | 2708 | (+) | 0.882 | tcaAAGTtaagt                |
| V\$BRNF                                            | Brn POU domain factors                                         | V\$BRN2.02       | Brn-2, POU-III protein class                                           | 140  | 158  | 149  | (+) | 0.881 | aatggatgagTCAgtcc           |
| V\$SORY                                            | SOX/SRY-sex/testis determining and related factors             | V\$HBP1.01       | HMG box-containing protein 1                                           | 569  | 591  | 580  | (-) | 0.881 | attaatGAAAGTctactaggtta     |
| V\$ABDB                                            | Abdominal-B type homeodomain transcription factors             | V\$SHOXB9.01     | Abd-B-like homeodomain protein Hoxb-9                                  | 1021 | 1037 | 1029 | (-) | 0.881 | catgcctTAAAgaa              |
| V\$SHOX                                            | HOX - PBX complexes                                            | V\$SHOXB4.02     | Homeobox B4                                                            | 1828 | 1844 | 1836 | (+) | 0.881 | tgagTGATgaaatgaa            |
| V\$IRFF                                            | Interferon regulatory factors                                  | V\$ISRE.02       | Interferon-stimulated response element                                 | 1878 | 1902 | 1890 | (-) | 0.881 | caagtaagcaagGAAAgctatga     |
| V\$MYT1                                            | MYT1 C2HC zinc finger protein                                  | V\$MYT1.02       | MyT1 zinc finger transcription factor involved in primary neurogenesis | 2180 | 2192 | 2186 | (+) | 0.881 | gttAAGTtgaag                |
| V\$ABDB                                            | Abdominal-B type homeodomain transcription factors             | V\$SHOXB9.01     | Abd-B-like homeodomain protein Hoxb-9                                  | 2639 | 2655 | 2647 | (+) | 0.881 | gtccttccTAAAcagtg           |
| V\$P53F                                            | p53 tumor suppressor                                           | V\$TP63.01       | Tumor protein p63                                                      | 227  | 251  | 239  | (-) | 0.88  | accctgtagtgagaaCATGtggtgc   |
| V\$SP1F                                            | GC-Box factors SP1/GC                                          | V\$TIEG.01       | TGFbeta-inducible early gene (TIEG) / Early growth response factor 1   | 620  | 636  | 628  | (+) | 0.879 | aaatGGGTgtgtgtg             |
| V\$ABDB                                            | Abdominal-B type homeodomain transcription factors             | V\$SHOXC9.01     | Homeobox C9 / Hox-3beta                                                | 2322 | 2338 | 2330 | (-) | 0.879 | tgacgcaTGAACgatt            |
| V\$CREB                                            | cAMP-responsive element binding proteins                       | V\$E4BP4.01      | E4BP4, bZIP domain, transcriptional repressor                          | 2531 | 2551 | 2541 | (+) | 0.879 | aatltaaatGTAAttataa         |
| V\$OCT1                                            | Octamer binding protein                                        | V\$OCT2.01       | Octamer-binding transcription factor-2, POU class 2 homeobox 1         | 2620 | 2606 | 2613 | (-) | 0.879 | tttATCCaaattctt             |
| V\$SORY                                            | SOX/SRY-sex/testis determining and related factors             | V\$HBP1.01       | HMG box-containing protein 1                                           | 1046 | 1068 | 1057 | (-) | 0.878 | tggtgagAATGagctgtgtcat      |
| Signal transducer and activator of transcription 6 | V\$STAT.01                                                     |                  | Signal transducers and activators of transcription 6                   | 1622 | 1640 | 1631 | (+) | 0.878 | ccgatgccGGAAAgatctt         |
| V\$STAT                                            | Signal transducer and activator of transcription 6             | V\$STAT6.01      | STAT6: signal transducer and activator of transcription 6              | 2509 | 2527 | 2518 | (-) | 0.878 | taacTCCCctggaagggtc         |
| V\$LHXF                                            | LIM homeodomain factors                                        | V\$LHX3.02       | LIM-homeodomain transcription factor LHX3                              | 2517 | 2539 | 2528 | (+) | 0.878 | caggggagttataTAAAttataa     |
| V\$OSRF                                            | Odd-skipped related factors                                    | V\$OSR1.01       | Odd-skipped related 1                                                  | 2805 | 2817 | 2811 | (+) | 0.878 | atacaGTAAGgagg              |
| V\$BRAC                                            | Brachyury gene, mesoderm development                           | V\$TBX21.01      | T-box transcription factor TBX21, dimeric binding site                 | 374  | 402  | 388  | (-) | 0.877 | gtgccatgtGGTGtgctgacgcattaa |
| V\$EV11                                            | EV11-myeoid transforming protein                               | V\$EV11.05       | Ecotropic viral integration site 1 encoded factor, amino-terminal      | 722  | 738  | 730  | (+) | 0.877 | cagaccaGATAgagcta           |
| V\$SETSF                                           | Human and murine ETS1 factors                                  | V\$GABP.01       | GABP: GA binding protein                                               | 1561 | 1581 | 1571 | (+) | 0.877 | cagggcaTGAAAgagcggaa        |
| V\$STAT                                            | Signal transducer and activator of transcription 6             | V\$STAT.01       | Signal transducers and activators of transcription                     | 2039 | 2057 | 2048 | (+) | 0.877 | agaatttgcGGAaagatg          |
| V\$CLOX                                            | CLOX and CLOX homology (CDP) factors                           | V\$CLOX.01       | Cut-like homeodomain protein                                           | 2284 | 2306 | 2295 | (+) | 0.877 | tggtcATCAatttacttctgt       |
| V\$CREB                                            | cAMP-responsive element binding proteins                       | V\$E4BP4.01      | E4BP4, bZIP domain, transcriptional repressor                          | 2518 | 2538 | 2528 | (-) | 0.877 | tataaattataAAactccct        |
| V\$AP1F                                            | MAF and AP1 related factors                                    | V\$MAFB.01       | MAFB/Kreisler basic region/leucine zipper transcription factor         | 745  | 769  | 757  | (-) | 0.876 | tttaagcttttTCAGCaacttaga    |
| V\$CART                                            | Cart-1 (cartilage homeoprotein 1)                              | V\$PROP1.02      | Prophet of Pit 1, PROP paired-like homeobox 1, dimeric binding site    | 2532 | 2552 | 2542 | (-) | 0.876 | attataaattacATTAtaaat       |
| V\$EV11                                            | EV11-myeoid transforming protein                               | V\$EV11.06       | Ecotropic viral integration site 1 encoded factor, amino-terminal      | 366  | 382  | 374  | (+) | 0.875 | atgacaAGTtaatgcgt           |
| O\$VTBP                                            | Vertebrate TATA binding protein factor                         | O\$ATATA.01      | Avian C-type LTR TATA box                                              | 758  | 774  | 766  | (-) | 0.875 | aagttttTAAGctttt            |
| V\$OSRF                                            | Odd-skipped related factors                                    | V\$OSR1.01       | Odd-skipped related 1                                                  | 1464 | 1476 | 1470 | (+) | 0.875 | caacaGTAGatag               |
| V\$ZF10                                            | C2H2 zinc finger transcription factors 10                      | V\$PRDM14.01     | PR domain zinc finger protein 14                                       | 1544 | 1558 | 1551 | (+) | 0.875 | tggtTAGggaagtlca            |
| V\$SHOX                                            | HOX - PBX complexes                                            | V\$SHOXB4.02     | Homeobox B4                                                            | 1824 | 1840 | 1832 | (+) | 0.875 | ccaaTGAGTgatgaatg           |
| V\$EV11                                            | EV11-myeoid transforming protein                               | V\$EV11.06       | Ecotropic viral integration site 1 encoded factor, amino-terminal      | 1846 | 1862 | 1854 | (+) | 0.875 | actaaaAGATaaagacc           |
| V\$AP1F                                            | AP1, Activating protein 1                                      | V\$AP1.02        | Activator protein 1                                                    | 2367 | 2379 | 2373 | (-) | 0.875 | aagtGAGTtacta               |
| V\$CREB                                            | cAMP-responsive element binding proteins                       | V\$E4BP4.01      | E4BP4, bZIP domain, transcriptional repressor                          | 2519 | 2539 | 2529 | (+) | 0.875 | ggggagttataTAAAttataa       |
| V\$BZIP                                            | Heterodimers between bZIP family members                       | V\$CEBPE_ATF4.02 | Heterodimer of CEBP epsilon and ATF4                                   | 2535 | 2547 | 2541 | (+) | 0.875 | tataatGTAAtttt              |
| V\$NKXH                                            | NKX homeodomain factors                                        | V\$NKX31.01      | Prostate-specific homeodomain protein NKX3.1                           | 754  | 772  | 763  | (-) | 0.874 | gttttAAGTctttttag           |
| V\$ESRR                                            | Estrogen-related receptors                                     | V\$ERR.01        | Estrogen related receptor                                              | 1597 | 1619 | 1608 | (+) | 0.874 | acgggaagctcAAGGcgaaggg      |
| V\$ARID                                            | AT rich interactive domain factors                             | V\$ARID5A.01     | AT rich interactive domain 5A (MRF1-like)                              | 551  | 571  | 561  | (+) | 0.873 | attaATATagtcctgtgac         |
| V\$HNF6                                            | Onecut homeodomain factor HNF6                                 | V\$HNF6.01       | Liver enriched Cut - Homeodomain transcription factor HNF6             | 1311 | 1327 | 1319 | (+) | 0.873 | ctgtttTCAAaaat              |
| V\$NFAT                                            | Nuclear factor of activated T-cells                            | V\$NFAT5.02      | Nuclear factor of activated T-cells 5                                  | 1875 | 1893 | 1884 | (-) | 0.873 | caaaGGAaagctatgagtg         |
| V\$NFAT                                            | Nuclear factor of activated T-cells                            | V\$NFAT5.01      | Nuclear factor of activated T-cells 5                                  | 2417 | 2435 | 2426 | (+) | 0.873 | ggaaGGAaacttgacatg          |
| V\$HBOX                                            | Homeobox transcription factors                                 | V\$GSH1.01       | Homeobox transcription factor Gsh-1                                    | 2628 | 2646 | 2637 | (-) | 0.873 | ggaaagacagATAAggttc         |
| V\$NBRE                                            | NGFI-B response elements, nur subfamily                        | V\$NBRE.01       | Monomers of the nur subfamily of nuclear receptors (nur77)             | 2236 | 2250 | 2243 | (-) | 0.872 | tctaAAGcccacag              |
| V\$CDXF                                            | Vertebrate caudal related homeodomain proteins                 | V\$CDX1.02       | Caudal type homeo box 1                                                | 2282 | 2300 | 2291 | (-) | 0.872 | aagtaaaTTGAtgaccaag         |

|          |                                             |                  |                                                               |      |      |      |     |       |                               |
|----------|---------------------------------------------|------------------|---------------------------------------------------------------|------|------|------|-----|-------|-------------------------------|
| V\$PAX6  | PAX-4/PAX-6 paired domain binding sites     | V\$PAX6.02       | PAX6 paired domain and homeodomain are required for bin       | 1780 | 1798 | 1789 | (+) | 0.871 | ctggcatttCCAGcactg            |
| V\$CDXF  | Vertebrate caudal related homeodomain p     | V\$CDX2.02       | Caudal type homeobox transcription factor 2                   | 2448 | 2466 | 2457 | (+) | 0.871 | atcattatTTATccattt            |
| V\$NKRIF | Nuclear factor-kappaB repressing factor     | V\$NKRIF.01      | NFKB repressing factor (NRF)                                  | 2516 | 2526 | 2521 | (-) | 0.871 | aacTCCCctgg                   |
| V\$BRNF  | Brn POU domain factors                      | V\$BRN2.01       | Brn-2, POU-III protein class                                  | 87   | 105  | 96   | (+) | 0.87  | tgGATTaaagaatgtggc            |
| V\$BRAC  | Brachyury gene, mesoderm development        | V\$TBR1.01       | T-box brain protein 1                                         | 239  | 267  | 253  | (+) | 0.87  | ctcaactcacagGTGAaattgaacaatga |
| V\$IRFF  | Interferon regulatory factors               | V\$IRF2.02       | Interferon regulatory factor 2                                | 486  | 510  | 498  | (+) | 0.87  | aaaaaagaGAAAtgacatcacagact    |
| V\$IRXF  | Iroquois homeobox transcription factors     | V\$IRX3.01       | Iroquois homeobox 3                                           | 858  | 870  | 864  | (+) | 0.87  | tctcCAATGtaata                |
| V\$NBRE  | NGF1-B response elements, nur subfamily     | V\$NBRE.01       | Monomers of the nur subfamily of nuclear receptors (nur77     | 991  | 1005 | 998  | (+) | 0.87  | gataAAGGccagggg               |
| V\$HNF1  | Hepatic Nuclear Factor 1                    | V\$HNB0X.01      | Homeobox containing 1                                         | 1306 | 1322 | 1314 | (+) | 0.87  | tcttcttGTAttca                |
| V\$IKRS  | Ikaros zinc finger family                   | V\$IK3.01        | Ikaros 3, potential regulator of lymphocyte differentiation   | 1626 | 1638 | 1632 | (+) | 0.87  | tgccgGGAAGatc                 |
| V\$SORY  | SOX/SRY-sex/testis determining and relat    | V\$SOX5.01       | Sox-5                                                         | 1791 | 1813 | 1802 | (-) | 0.87  | tggttaCAATgcaatcagtgctg       |
| V\$HAML  | Human acute myelogenous leukemia fact       | V\$AML3.01       | Runt-related transcription factor 2 / CBFA1 (core-binding fa  | 1539 | 1553 | 1546 | (+) | 0.869 | ttggGTGTgtaggga               |
| V\$EBOX  | E-box binding factors                       | V\$MAX.02        | MYC associated factor X                                       | 225  | 241  | 233  | (-) | 0.868 | gagaaCATGtggtgctt             |
| V\$IKRS  | Ikaros zinc finger family                   | V\$IK3.01        | Ikaros 3, potential regulator of lymphocyte differentiation   | 1164 | 1176 | 1170 | (+) | 0.868 | gacagGGAAtatg                 |
| V\$NBRE  | NGF1-B response elements, nur subfamily     | V\$NBRE.01       | Monomers of the nur subfamily of nuclear receptors (nur77     | 1612 | 1626 | 1619 | (+) | 0.868 | ggcaAAGGtcccgat               |
| V\$LEFF  | LEF1/TCF                                    | V\$LEF1.01       | TCF/LEF-1, involved in the Wnt signal transduction pathwa     | 1748 | 1764 | 1756 | (-) | 0.868 | tggtgataAAAGccctc             |
| V\$LEFF  | LEF1/TCF                                    | V\$LEF1.01       | TCF/LEF-1, involved in the Wnt signal transduction pathwa     | 39   | 55   | 47   | (+) | 0.867 | acaatgCAAGagactg              |
| V\$PARF  | PAR/bZIP family                             | V\$TEF.01        | Thyrotrophic embryonic factor                                 | 495  | 511  | 503  | (-) | 0.867 | gagctgatGTCattt               |
| V\$SIXF  | Sine oculis (SIX) homeodomain factors       | V\$SIX1.01       | Sine oculis homeobox homolog 1                                | 961  | 975  | 968  | (-) | 0.867 | tagatgaTATCagga               |
| V\$PARF  | PAR/bZIP family                             | V\$VBP.01        | PAR-type chicken vitellogenin promoter-binding protein        | 1007 | 1023 | 1015 | (+) | 0.867 | agggagatGTAaatt               |
| V\$PARF  | PAR/bZIP family                             | V\$TEF.01        | Thyrotrophic embryonic factor                                 | 1272 | 1288 | 1280 | (-) | 0.867 | ggagttatGTAgctt               |
| V\$RREB  | Ras-responsive element binding protein      | V\$RREB1.01      | Ras-responsive element binding protein 1                      | 2836 | 2850 | 2843 | (-) | 0.867 | cCCAaaaaaacactc               |
| V\$PAX3  | PAX-3 binding sites                         | V\$PAX3.02       | Pax-3 paired domain protein                                   | 2189 | 2207 | 2198 | (-) | 0.866 | actgTTACactgaccttc            |
| V\$CP2F  | CP2-erythrocyte Factor related to droso     | V\$CP2.02        | LBP-1c (leader-binding protein-1c), LSF (late SV40 factor),   | 2249 | 2267 | 2258 | (-) | 0.866 | tACTCgggagctggcctc            |
| V\$GREF  | Glucocorticoid responsive and related ele   | V\$GREF.01       | Glucocorticoid receptor, C2C2 zinc finger protein binds glu   | 2380 | 2398 | 2389 | (+) | 0.866 | gaggaacaacctGTCTtga           |
| V\$MEF2  | MEF2, myocyte-specific enhancer binding     | V\$SL1.01        | Member of the RSRF (related to serum response factor) pr      | 2432 | 2454 | 2443 | (+) | 0.866 | catgaaCTACTataatcatta         |
| V\$PAXH  | PAX homeodomain binding sites               | V\$PAX6_HD.01    | Paired box 6, homeodomain binding site                        | 2525 | 2539 | 2532 | (-) | 0.866 | ttataAATtataaa                |
| V\$BRN5  | Brn-5 POU domain factors                    | V\$BRN5.01       | POU class 6 homeobox 1 (POU6F1)                               | 1147 | 1169 | 1158 | (+) | 0.865 | ggagctcctATTAAagacagg         |
| V\$STAF  | Selenocysteine tRNA activating factor       | V\$STAF.02       | Se-Cys tRNA gene transcription activating factor              | 2206 | 2236 | 2221 | (-) | 0.864 | ccttcaactaccCCAacctgccactccac |
| V\$AP1R  | MAF and AP1 related factors                 | V\$MAFB.01       | MAFB/Kreisler basic region/leucine zipper transcription fac   | 2275 | 2299 | 2287 | (+) | 0.864 | tagcctcttggTTCaatfact         |
| V\$BRNF  | Brn POU domain factors                      | V\$BRN3.01       | Brn-3, POU-IV protein class                                   | 2446 | 2464 | 2455 | (+) | 0.864 | taatacattaTTAttccat           |
| V\$HNF1  | Hepatic Nuclear Factor 1                    | V\$HNF1.04       | Hepatocyte nuclear factor 1 alpha (Tcf-1)                     | 2699 | 2715 | 2707 | (+) | 0.864 | agctcaaaGTTAaatg              |
| V\$CLOX  | CLOX and CLOX homology (CDP) factors        | V\$CLOX.01       | Cut-like homeodomain protein                                  | 129  | 151  | 140  | (-) | 0.863 | aacatATCCattttatggctgt        |
| V\$LEFF  | LEF1/TCF                                    | V\$LEF1.01       | TCF/LEF-1, involved in the Wnt signal transduction pathwa     | 153  | 169  | 161  | (-) | 0.863 | gtccctaCAAAGgacat             |
| V\$PERO  | Peroxisome proliferator-activated recepto   | V\$PPARG.03      | Peroxisome proliferator-activated receptor gamma, DR1 si      | 151  | 173  | 162  | (-) | 0.863 | ccatgctccatAAAGgacatga        |
| V\$P53F  | p53 tumor suppressor                        | V\$TP63.01       | Tumor protein p63                                             | 154  | 178  | 166  | (+) | 0.863 | tgctcttggaggaCATGgatgaa       |
| V\$CART  | Cart-1 (cartilage homeoprotein 1)           | V\$RH0X6.01      | Reproductive homeobox 6, placenta specific homeobox 1         | 573  | 593  | 583  | (-) | 0.863 | acattAATgaaatgctacta          |
| V\$IRXF  | Iroquois homeobox transcription factors     | V\$IRX6.01       | Iroquois homeobox 6                                           | 857  | 869  | 863  | (-) | 0.863 | attaCATGgagaa                 |
| V\$HOXF  | Paralog hox genes 1-8 from the four hox c   | V\$SHOXB6.01     | Homeobox B6 / Hox2-beta                                       | 861  | 879  | 870  | (+) | 0.863 | ccatgTAATaaccagaag            |
| V\$IRFF  | Interferon regulatory factors               | V\$ISRE.01       | Interferon-stimulated response element                        | 2393 | 2417 | 2405 | (+) | 0.863 | tcctgagtaactGAAActgttg        |
| V\$PBXC  | PBX - MEIS complexes                        | V\$PBX1_MEIS1.02 | Binding site for a Pbx1/Meis1 heterodimer                     | 65   | 81   | 73   | (-) | 0.862 | tcattTGATggacatg              |
| V\$CLOX  | CLOX and CLOX homology (CDP) factors        | V\$CPHX.01       | Cytoplasmic polyadenylated homeobox                           | 954  | 976  | 965  | (-) | 0.862 | ctAGATgatacaggatccaaag        |
| V\$FAST  | FAST-1 SMAD interacting proteins            | V\$FAST1.01      | FAST-1 SMAD interacting protein                               | 1833 | 1849 | 1841 | (-) | 0.862 | tagttgttCATTcactc             |
| V\$OCT1  | Octamer binding protein                     | V\$OCT1.03       | Octamer-binding transcription factor-1, POU class 2 home      | 2446 | 2460 | 2453 | (-) | 0.862 | aataaataATGAtta               |
| V\$BNCF  | Basonuclin rDNA transcription factor (Po    | V\$BNC.01        | Basonuclin, cooperates with UBF1 in rDNA Poll transcriptio    | 144  | 162  | 153  | (+) | 0.861 | gatgagttcaTGTCCttg            |
| V\$XBBF  | X-box binding factors                       | V\$RFX3.02       | Regulatory factor X, 3 (secondary DNA binding preference      | 266  | 284  | 275  | (+) | 0.861 | gagaacacatgGACAcagg           |
| V\$ZF05  | C2H2 zinc finger transcription factors 5    | V\$ZFP410.01     | Zinc finger protein 410, APA-1                                | 310  | 324  | 317  | (+) | 0.861 | tgctatgGGGTgggg               |
| V\$CREB  | cAMP-responsive element binding protein     | V\$E4BP4.01      | E4BP4, bZIP domain, transcriptional repressor                 | 405  | 425  | 415  | (+) | 0.861 | gtatacctatGTAaacaact          |
| V\$HNF6  | Onecut homeodomain factor HNF6              | V\$HNF6.02       | Liver enriched Cut - Homeodomain transcription factor HNF     | 1170 | 1186 | 1178 | (-) | 0.861 | cagcaacatCCATattc             |
| V\$EV11  | EV11-myleoid transforming protein           | V\$EV11.02       | Ecotropic viral integration site 1 encoded factor, amino-term | 666  | 682  | 674  | (+) | 0.86  | aggataAAAataaacaa             |
| V\$SRFF  | Serum response element binding factor       | V\$SRF.04        | Serum response factor                                         | 2140 | 2158 | 2149 | (-) | 0.86  | gatgccagaTCTGtaaac            |
| V\$PRDF  | Positive regulatory domain I binding factor | V\$PRDM1.02      | PRDI (positive regulatory domain I element) binding factor    | 487  | 505  | 496  | (+) | 0.859 | aaaaagaGAAAtgacatc            |
| V\$HBOX  | Homeobox transcription factors              | V\$VAX2.01       | Ventral anterior homeobox 2                                   | 577  | 595  | 586  | (+) | 0.859 | agacattcATTAAatgtgt           |
| V\$FAST  | FAST-1 SMAD interacting proteins            | V\$FAST1.02      | Forkhead box H1 (Foxh1)                                       | 1010 | 1026 | 1018 | (+) | 0.859 | gaggaTGTAAattctt              |
| V\$OCT1  | Octamer binding protein                     | V\$POU3F3.01     | POU class 3 homeobox 3 (POU3F3), OTF8                         | 1931 | 1945 | 1938 | (+) | 0.859 | ccittGCATaccctt               |
| V\$HOXF  | Paralog hox genes 1-8 from the four hox c   | V\$SHOXC6.01     | Homeobox C6 / Hox-3C                                          | 2537 | 2555 | 2546 | (+) | 0.859 | taatgtAATtataatggg            |
| V\$RXRF  | RXR heterodimer binding sites               | V\$THR8.02       | Thyroid hormone receptor, beta (ER5 - everted repeat, spa     | 150  | 174  | 162  | (+) | 0.858 | ttcattgcttggtagGACatgga       |
| V\$HNF1  | Hepatic Nuclear Factor 1                    | V\$HNF1.01       | Hepatic nuclear factor 1                                      | 372  | 388  | 380  | (+) | 0.858 | aGTTAatgctacagca              |
| V\$HOXF  | Paralog hox genes 1-8 from the four hox c   | V\$SHOXC8.01     | Homeobox C8 / Hox-3alpha                                      | 858  | 876  | 867  | (-) | 0.858 | ctgggttAATAcattggaga          |
| V\$ETSF  | Human and murine ETS1 factors               | V\$SSPEF.01      | SAM pointed domain containing ets transcription factor        | 951  | 971  | 961  | (-) | 0.858 | tgatacAGGAtcacaagcaa          |
| V\$BNCF  | Basonuclin rDNA transcription factor (Po    | V\$BNC.01        | Basonuclin, cooperates with UBF1 in rDNA Poll transcriptio    | 1182 | 1200 | 1191 | (-) | 0.858 | gatggtaccTGTCCagca            |
| V\$OCT1  | Octamer binding protein                     | V\$OCT2.01       | Octamer-binding transcription factor-2, POU class 2 home      | 357  | 371  | 364  | (+) | 0.857 | ctaATGTaaatgaca               |
| V\$HOXF  | Paralog hox genes 1-8 from the four hox c   | V\$SHOXC4.01     | Homeobox C4 / Hox-3epsilon                                    | 578  | 596  | 587  | (+) | 0.857 | gacattCATTaatgtgtt            |
| V\$AP1R  | MAF and AP1 related factors                 | V\$VMAF.01       | v-Maf                                                         | 885  | 909  | 897  | (-) | 0.857 | cgagccgcttGTAGctgtgaaaca      |
| V\$LEFF  | LEF1/TCF                                    | V\$LEF1.04       | TCF/LEF-1 (secondary DNA binding preference)                  | 2284 | 2300 | 2292 | (+) | 0.857 | tggttaCAATtattt               |
| V\$YY1F  | Activator/repressor binding to transcrip    | V\$YY1.03        | Transcription factor yin yang 1                               | 383  | 405  | 394  | (-) | 0.856 | catgtgCCATgtgtgtgtgt          |
| V\$MYT1  | MYT1 C2HC zinc finger protein               | V\$MYT1.01       | MyT1 zinc finger transcription factor involved in primary ne  | 1101 | 1113 | 1107 | (+) | 0.856 | gaaAAGTaccatt                 |

|          |                                                     |               |                                                               |      |      |      |     |       |                               |
|----------|-----------------------------------------------------|---------------|---------------------------------------------------------------|------|------|------|-----|-------|-------------------------------|
| VSNKXH   | NKX homeodomain factors                             | VSNKX31.01    | Prostate-specific homeodomain protein NKX3.1                  | 1318 | 1336 | 1327 | (+) | 0.856 | ttcaatAAATAtttataga           |
| V\$RXRF  | RXR heterodimer binding sites                       | V\$VDR_RXR.05 | Bipartite binding site of VDR/RXR heterodimers, DR4 sites     | 1923 | 1947 | 1935 | (-) | 0.856 | cgaGAGGtatgc aaaggatgagtag    |
| V\$HESF  | Vertebrate homologues of enhancer of split          | V\$DEC1.01    | Basic helix-loop-helix protein known as Dec1, Sira13, Shar    | 2370 | 2384 | 2377 | (-) | 0.856 | gccctCAAGtgagtagta            |
| V\$FAST  | FAST-1 SMAD interacting proteins                    | V\$FAST1.03   | Forkhead box H1 (Foxh1)                                       | 2472 | 2488 | 2480 | (+) | 0.856 | atattatgtgCATTTgtt            |
| V\$LHXF  | Lim homeodomain factors                             | V\$LHX3.02    | LIM-homeodomain transcription factor LHX3                     | 2529 | 2551 | 2540 | (+) | 0.856 | ataattataatgTAA1Tataa         |
| OSVTBP   | Vertebrate TATA binding protein factor              | OSMTATA.01    | Muscle TATA box                                               | 826  | 842  | 834  | (-) | 0.855 | cttttTAAAccattata             |
| OSVTBP   | Vertebrate TATA binding protein factor              | OSMTATA.01    | Muscle TATA box                                               | 831  | 847  | 839  | (+) | 0.855 | tggttTAAaagatggg              |
| V\$BRN5  | Brn-5 POU domain factors                            | V\$BRN5.04    | POU class 6 homeobox 1 (POU6F1)                               | 1047 | 1069 | 1058 | (+) | 0.855 | tgacacagctcATT1Ctaccaccag     |
| V\$NF1F  | Nuclear factor 1                                    | V\$NF1.01     | Nuclear factor 1                                              | 1083 | 1103 | 1093 | (-) | 0.855 | ttcTTTGcattttaccagcat         |
| V\$AP1R  | MAF and AP1 related factors                         | V\$BACH1.01   | BTB/POZ-bZIP transcription factor BACH1 forms heterodimer     | 1820 | 1844 | 1832 | (+) | 0.855 | gcacccaatGAGTgatgatgaaca      |
| V\$HOXF  | Paralog hox genes 1-8 from the four hox clusters    | V\$SHOXB.01   | Homeobox B8 / Hox-2delta                                      | 2448 | 2466 | 2457 | (-) | 0.855 | aaatggaATAAataatgat           |
| V\$HBOX  | Homeobox transcription factors                      | V\$GSH1.01    | Homeobox transcription factor Gsh-1                           | 544  | 562  | 553  | (+) | 0.854 | gcaagcgattTAAAtalatg          |
| V\$PAX3  | PAX-3 binding sites                                 | V\$PAX3.02    | Pax-3 paired domain protein                                   | 625  | 643  | 634  | (-) | 0.854 | tgtTCCcacaacacaccg            |
| V\$NR2F  | Nuclear receptor subfamily 2 factors                | V\$HNF4.01    | Hepatic nuclear factor 4, DR1 sites                           | 983  | 1007 | 995  | (+) | 0.854 | ggaagggggaTAAAgggcaggggaa     |
| V\$EREF  | Estrogen response elements                          | V\$ER.01      | Estrogen receptor, ER sites                                   | 1051 | 1069 | 1060 | (-) | 0.854 | ctggGTGAgaaatgagctgt          |
| V\$PARF  | PAR/bZIP family                                     | V\$TEF.01     | Thyrotrophic embryonic factor                                 | 1079 | 1095 | 1087 | (+) | 0.854 | atccatcGTAAagat               |
| V\$NKRF  | Nuclear factor-kappaB repressing factor             | V\$NKRF.01    | NFKB repressing factor (NRF)                                  | 1127 | 1137 | 1132 | (+) | 0.854 | aaaTTCtcagc                   |
| V\$STAT  | Signal transducer and activator of transcription    | V\$STAT6.01   | STAT6: signal transducer and activator of transcription 6     | 438  | 456  | 447  | (+) | 0.853 | catgTACCctagaacttaa           |
| V\$PCP2F | CP2-erythrocyte Factor related to drosopterins      | V\$PCP2.02    | LBP-1c (leader-binding protein-1c), LSF (late SV40 factor),   | 640  | 658  | 649  | (+) | 0.853 | cACAGgaactaacctgcaca          |
| V\$NKXH  | NKX homeodomain factors                             | V\$NKX31.01   | Prostate-specific homeodomain protein NKX3.1                  | 1319 | 1337 | 1328 | (-) | 0.853 | gtclatAAATAtttatga            |
| V\$HOXF  | Paralog hox genes 1-8 from the four hox clusters    | V\$SHOXD3.01  | Homeobox D3 / Hox-4alpha                                      | 1490 | 1508 | 1499 | (+) | 0.853 | gatgaaAAT1taagcaatg           |
| V\$YY1F  | Activator/repressor binding to transcription factor | V\$YY1.01     | Yin and Yang 1 activator sites                                | 2042 | 2064 | 2053 | (-) | 0.853 | agatagCCATctttccgcaaat        |
| V\$HNF6  | Onecut homeodomain factor HNF6                      | V\$OCT2.01    | CUT-homeodomain transcription factor Onecut-2                 | 2118 | 2134 | 2126 | (-) | 0.853 | ggaaaaAATCagaatgg             |
| V\$RXRF  | RXR heterodimer binding sites                       | V\$THRA.01    | Thyroid hormone receptor, alpha (ER4 - everted repeat, sp     | 2254 | 2278 | 2266 | (+) | 0.853 | agactgcccgagtaAGG1Taccatgac   |
| V\$CREB  | cAMP-responsive element binding proteins            | V\$E4BP4.01   | E4BP4, bZIP domain, transcriptional repressor                 | 352  | 372  | 362  | (+) | 0.852 | tacacctaatGTAAatgacaa         |
| V\$CREB  | cAMP-responsive element binding proteins            | V\$CREB2.01   | cAMP-responsive element binding protein 2                     | 493  | 513  | 503  | (+) | 0.852 | agaaaaTGACatcagactcat         |
| V\$ZF10  | C2H2 zinc finger transcription factors 10           | V\$SPRDM14.01 | PR domain zinc finger protein 14                              | 1985 | 1999 | 1992 | (+) | 0.852 | ttcTTAGTgtccttg               |
| V\$HOXC  | HOX - PBX complexes                                 | V\$SHOXB4.02  | Homeobox B4                                                   | 75   | 91   | 83   | (+) | 0.851 | tc aaTGATgactggat             |
| V\$HOXF  | Paralog hox genes 1-8 from the four hox clusters    | V\$SHOXC4.01  | Homeobox C4 / Hox-3epsilon                                    | 575  | 593  | 584  | (-) | 0.851 | acattTAAATgactgtctac          |
| V\$BRNF  | Brn POU domain factors                              | V\$BRN3.03    | POU class 4 homeobox 3 (POU4F3), BRN3C                        | 577  | 595  | 586  | (-) | 0.851 | acacattTAA1Tgaatgtct          |
| V\$OCT1  | Octamer binding protein                             | V\$OCT1.03    | Octamer-binding transcription factor-1, POU class 2 homeo     | 580  | 594  | 587  | (-) | 0.851 | cacatttaATGaatg               |
| V\$NR2F  | Nuclear receptor subfamily 2 factors                | V\$HNF4A.03   | Hepatic nuclear factor 4alpha homodimer, DR1 sites (spec      | 1996 | 2020 | 2008 | (+) | 0.851 | ctggtagcccgagtaAGG1Taccatggtt |
| V\$HOXF  | Paralog hox genes 1-8 from the four hox clusters    | V\$SHOXC6.01  | Homeobox C6 / Hox-3C                                          | 2534 | 2552 | 2543 | (-) | 0.851 | attataAAT1Taatataa            |
| V\$NR2F  | Nuclear receptor subfamily 2 factors                | V\$HNF4.01    | Hepatic nuclear factor 4, DR1 sites                           | 2693 | 2717 | 2705 | (+) | 0.851 | tgtgccagctCAAaggtaatgggg      |
| V\$OCT1  | Octamer binding protein                             | V\$OCT1.03    | Octamer-binding transcription factor-1, POU class 2 homeo     | 577  | 591  | 584  | (+) | 0.85  | agacattcATT1Aaat              |
| V\$SCART | Cart-1 (cartilage homeoprotein 1)                   | V\$SPROP1.01  | Prophet of Pit 1, PROP paired-like homeobox 1                 | 578  | 598  | 588  | (+) | 0.85  | gacattCAT1Taaatgltttt         |
| V\$PAX6  | PAX-4/PAX-6 paired domain binding sites             | V\$PAX6.04    | PAX6 paired domain binding site                               | 1497 | 1515 | 1506 | (-) | 0.85  | attTCCCcattgccctaat           |
| V\$PCP2F | CP2-erythrocyte Factor related to drosopterins      | V\$PCP2.02    | LBP-1c (leader-binding protein-1c), LSF (late SV40 factor),   | 1755 | 1773 | 1764 | (-) | 0.85  | aACTGTcctcggtagca             |
| V\$ZF10  | C2H2 zinc finger transcription factors 10           | V\$SPRDM14.01 | PR domain zinc finger protein 14                              | 2243 | 2257 | 2250 | (+) | 0.85  | ccitTAGagccagac               |
| V\$BRNF  | Brn POU domain factors                              | V\$BRN3.03    | POU class 4 homeobox 3 (POU4F3), BRN3C                        | 2443 | 2461 | 2452 | (-) | 0.85  | gaataaaTAA1Tgattataa          |
| V\$HNF1  | Hepatic Nuclear Factor 1                            | V\$HNF1.04    | Hepatocyte nuclear factor 1 alpha (Tcf-1)                     | 2680 | 2696 | 2688 | (+) | 0.85  | cagttgtGT1Taatgtg             |
| V\$SIXF  | Sine oculis (SIX) homeodomain factors               | V\$SIX1.01    | Sine oculis homeobox homolog 1                                | 2800 | 2814 | 2807 | (-) | 0.85  | cctactGTATCattt               |
| V\$PERO  | Peroxisome proliferator-activated receptor          | V\$PPARG.03   | Peroxisome proliferator-activated receptor gamma, DR1 sites   | 675  | 697  | 686  | (+) | 0.849 | taaaacaaaaAAAGtaatat          |
| V\$E2FF  | E2F-myc activator/cell cycle regulator              | V\$E2F.02     | E2F, involved in cell cycle regulation, interacts with Rb p10 | 931  | 947  | 939  | (-) | 0.849 | cgltggagcCAAAGatg             |
| OSVTBP   | Vertebrate TATA binding protein factor              | OSMTATA.01    | Muscle TATA box                                               | 1230 | 1246 | 1238 | (+) | 0.849 | tagctTAAAccctcagg             |
| V\$HOXF  | Paralog hox genes 1-8 from the four hox clusters    | V\$SHOXB3.01  | Homeobox B3 / Hox-2gamma                                      | 2444 | 2462 | 2453 | (+) | 0.849 | tataTCA1Tattattcc             |
| V\$SP1F  | GC-Box factors SP1/GC                               | V\$TIEG.01    | TGFbeta-inducible early gene (TIEG) / Early growth respon     | 2710 | 2726 | 2718 | (+) | 0.849 | aaatGGGGagtgagaag             |
| V\$HOXC  | HOX - PBX complexes                                 | V\$SHOXB4.02  | Homeobox B4                                                   | 65   | 81   | 73   | (-) | 0.848 | tcattTAA1Tgactgtg             |
| V\$IRFF  | Interferon regulatory factors                       | V\$ISRE.01    | Interferon-stimulated response element                        | 843  | 867  | 855  | (-) | 0.848 | tacatggagaaaaTAAAccctccat     |
| V\$SIXF  | Sine oculis (SIX) homeodomain factors               | V\$SIX1.01    | Sine oculis homeobox homolog 1                                | 960  | 974  | 967  | (+) | 0.848 | atcctgTATCattc                |
| V\$DICE  | Downstream Immunoglobulin Control Element           | V\$DICE.01    | Downstream Immunoglobulin Control Element, interacting fa     | 1085 | 1099 | 1092 | (-) | 0.848 | tggcATCTTaccagc               |
| V\$HEAT  | Heat shock factors                                  | V\$HSF1.01    | Heat shock factor 1                                           | 1402 | 1426 | 1414 | (+) | 0.848 | cttccgatcccAGAAagctgatt       |
| V\$HNF6  | Onecut homeodomain factor HNF6                      | V\$HNF6.01    | Liver enriched Cut - Homeodomain transcription factor HNF     | 1418 | 1434 | 1426 | (+) | 0.848 | agctglatTCAAtaggg             |
| V\$TALE  | TALE homeodomain class recognizing TGAGTAA          | V\$MEIS1.02   | Meis homeobox 1                                               | 173  | 189  | 181  | (+) | 0.847 | gatgaagctGGCAacca             |
| V\$SETSF | Human and murine ETs1 factors                       | V\$ETV6.01    | Ets variant 6                                                 | 867  | 887  | 877  | (+) | 0.847 | ataaaccAGAAgtaactgt           |
| V\$FKHD  | Fork head domain factors                            | V\$FREAC2.01  | Fork head related activator-2 (FOXF2)                         | 1083 | 1099 | 1091 | (+) | 0.847 | atgctGTAAAgatgccca            |
| V\$TEAF  | TEA/ATTS DNA binding domain factors                 | V\$TEF1.01    | TEF-1 related muscle factor                                   | 1205 | 1217 | 1211 | (+) | 0.847 | ccaCAT1Accctgtg               |
| V\$PERO  | Peroxisome proliferator-activated receptor          | V\$PPARG.03   | Peroxisome proliferator-activated receptor gamma, DR1 sites   | 1882 | 1904 | 1893 | (-) | 0.847 | gccaagtaagcAAAGgaaagct        |
| V\$PARF  | PAR/bZIP family                                     | V\$SHLF.01    | Hepatic leukemia factor                                       | 2360 | 2376 | 2368 | (+) | 0.847 | agatttttaGTAActca             |
| V\$SLHXF | Lim homeodomain factors                             | V\$SISL1.01   | Pancreatic and intestinal lim-homeodomain factor              | 2540 | 2562 | 2551 | (+) | 0.847 | tgttaatttaTAA1Tggccatact      |
| V\$HNF1  | Hepatic Nuclear Factor 1                            | V\$HNF1.04    | Hepatocyte nuclear factor 1 alpha (Tcf-1)                     | 365  | 381  | 373  | (+) | 0.846 | aatgacaaGT1Taatgagc           |
| V\$DMRT  | DM domain-containing transcription factor           | V\$DMRT5.01   | Doublesex and mab-3 related transcription factor 5            | 1451 | 1471 | 1461 | (-) | 0.846 | tactgtGT1Tctgttttca           |
| V\$TALE  | TALE homeodomain class recognizing TGAGTAA          | V\$TGIF2LX.01 | TGFB-induced factor homeobox 2-like, X-linked, dimeric bin    | 2227 | 2243 | 2235 | (-) | 0.846 | gccacagcTTC1Tactac            |
| V\$FKHD  | Fork head domain factors                            | V\$FHXB.01    | Fork head homologous X binds DNA with a dual sequence         | 2314 | 2330 | 2322 | (+) | 0.846 | gcaaccATAAtcgttca             |
| V\$HOMF  | Homeodomain transcription factors                   | V\$TLX1.01    | T-cell leukemia homeobox 1                                    | 2315 | 2333 | 2324 | (-) | 0.846 | tcatgaaCGAT1atgtgtg           |
| OSVTBP   | Vertebrate TATA binding protein factor              | OSMTATA.01    | Muscle TATA box                                               | 2464 | 2480 | 2472 | (+) | 0.846 | ttttTAAAtattagtg              |
| V\$HAML  | Human acute myelogenous leukemia factor             | V\$AML3.01    | Runt-related transcription factor 2 / CBFA1 (core-binding fa  | 57   | 71   | 64   | (-) | 0.845 | acaTGTGGgtgtgtt               |



|         |                                             |               |                                                               |      |      |      |     |       |                           |
|---------|---------------------------------------------|---------------|---------------------------------------------------------------|------|------|------|-----|-------|---------------------------|
| VSRP58  | RP58 (ZFP238) zinc finger protein           | VSRP58.01     | Zinc finger protein RP58 (ZNF238), associated preferential    | 228  | 240  | 234  | (-) | 0.845 | agaaCATGtggtg             |
| VSLHXF  | Lim homeodomain factors                     | VSLHX3.02     | LIM-homeodomain transcription factor LHX3                     | 579  | 601  | 590  | (-) | 0.845 | aggaaaacacattTAATgaatgt   |
| VSCDXF  | Vertebrate caudal related homeodomain p     | VSCDX2.01     | Cdx-2 mammalian caudal related intestinal transcr. factor     | 667  | 685  | 676  | (-) | 0.845 | tttttttTTAtttatfcc        |
| VSNFKB  | Nuclear factor kappa B/c-rel                | VSNFKAPPAB.02 | NF-kappaB                                                     | 1780 | 1794 | 1787 | (+) | 0.845 | ctGGCAttccacg             |
| VSLTSM  | Localized tandem sequence motif             | VSLTSM.03     | LTSM elements with 8 bp spacer                                | 2059 | 2073 | 2066 | (-) | 0.845 | ATCTTcttcagatag           |
| VSHBOX  | Homeobox transcription factors              | VSVAX1.01     | Ventral anterior homeobox 1                                   | 576  | 594  | 585  | (-) | 0.844 | cacattTAATgaatgcta        |
| VSMYT1  | MYT1 C2HC zinc finger protein               | VSMYT1.01     | MyT1 zinc finger transcription factor involved in primary ne  | 1104 | 1116 | 1110 | (-) | 0.844 | ttcAAGTgactt              |
| VSLHXF  | Lim homeodomain factors                     | VSLHX6.01     | LIM homeobox 6                                                | 1147 | 1169 | 1158 | (+) | 0.844 | ggagtgcttTATtaagacagg     |
| V\$FAST | FAST-1 SMAD interacting proteins            | V\$FAST1.02   | Forkhead box H1 (Foxh1)                                       | 57   | 73   | 65   | (-) | 0.843 | ggacaTGTGGgttggt          |
| V\$ZF12 | C2H2 zinc finger transcription factors 12   | V\$ZFP652.01  | Zinc finger protein 652 (ZNF652)                              | 2763 | 2777 | 2770 | (-) | 0.843 | ccacaaggTGAAt             |
| V\$CART | Cart-1 (cartilage homeoprotein 1)           | V\$RHOX6.01   | Reproductive homeobox 6, placenta specific homeobox 1         | 1146 | 1166 | 1156 | (-) | 0.842 | gtcttTAATaagagcactct      |
| V\$PARF | PAR/bZIP family                             | V\$DBP.01     | Albumin D-box binding protein                                 | 1213 | 1229 | 1221 | (+) | 0.842 | ctggtTTATgtttctc          |
| V\$RXRF | RXR heterodimer binding sites               | V\$RAR_RXR.01 | Retinoic acid receptor / retinoid X receptor heterodimer, DR  | 1606 | 1630 | 1618 | (+) | 0.842 | tgcaaggcgaaAGGTcccgatgccg |
| V\$BHLH | bHLH transcription factors expressed in n   | V\$BHLHA15.01 | Muscle, intestine and stomach expression 1 (MIST1)            | 2131 | 2143 | 2137 | (-) | 0.842 | aaaccTATGgaa              |
| V\$RXRF | RXR heterodimer binding sites               | V\$RARG.01    | Retinoic acid receptor gamma, homodimer DR2 binding site      | 2236 | 2260 | 2248 | (+) | 0.842 | gctgtggcttTAGagccagactgc  |
| V\$ZF57 | KRAB domain zinc finger protein 57          | V\$ZFP57.01   | Kruppel-associated box-containing zinc-finger protein 57 (23  | 23   | 35   | 29   | (+) | 0.841 | tatTGCgGcacta             |
| V\$BHLH | bHLH transcription factors expressed in n   | V\$BHLHA15.01 | Muscle, intestine and stomach expression 1 (MIST1)            | 227  | 239  | 233  | (+) | 0.841 | ggaccaCATGtcc             |
| V\$EBOX | E-box binding factors                       | V\$MNT.01     | MAX binding protein                                           | 421  | 437  | 429  | (-) | 0.841 | accacAACGtgcaggt          |
| V\$EV11 | EV11-myeloid transforming protein           | V\$EV11.02    | Ecotropic viral integration site 1 encoded factor, amino-term | 1213 | 1229 | 1221 | (-) | 0.841 | gagaaAACAaaacacag         |
| V\$ZF05 | C2H2 zinc finger transcription factors 5    | V\$ZFP410.01  | Zinc finger protein 410, APA-1                                | 1405 | 1419 | 1412 | (-) | 0.841 | ctttctGGATcggg            |
| V\$EV11 | EV11-myeloid transforming protein           | V\$EV11.02    | Ecotropic viral integration site 1 encoded factor, amino-term | 1434 | 1450 | 1442 | (+) | 0.841 | gagagAAGGtaaacaaa         |
| V\$AP1R | MAF and AP1 related factors                 | V\$MAFB.01    | MAFB/Kreisler basic region/leucine zipper transcription fac   | 184  | 208  | 196  | (+) | 0.84  | caaccatattCAGcaactatc     |
| VSLTSM  | Localized tandem sequence motif             | VSLTSM.03     | LTSM elements with 8 bp spacer                                | 503  | 517  | 510  | (+) | 0.84  | ATCAGactatagt             |
| V\$LEFF | LEF1/TCF                                    | V\$LEF1.04    | TCF/LEF-1 (secondary DNA binding preference)                  | 1313 | 1329 | 1321 | (+) | 0.84  | tgttatTCAaataat           |
| V\$HEAT | Heat shock factors                          | V\$HSF1.04    | Heat shock factor 1                                           | 1770 | 1794 | 1782 | (+) | 0.84  | agttgttctctggcattTTCGcgc  |
| V\$HOXF | Paralog hox genes 1-8 from the four hox c   | V\$HOX1-3.01  | Hox-1.3, vertebrate homeobox protein                          | 2623 | 2641 | 2632 | (-) | 0.84  | gacagTAATggtcacagt        |
| V\$RXRF | RXR heterodimer binding sites               | V\$THRB.02    | Thyroid hormone receptor, beta (ER5 - everted repeat, spa     | 150  | 174  | 162  | (-) | 0.839 | tcctgtccctcaaaGGACatgaa   |
| V\$BRNF | Brn POU domain factors                      | V\$BRN3.03    | POU class 4 homeobox 3 (POU4F3), BRN3C                        | 1153 | 1171 | 1162 | (+) | 0.839 | ctcttTAAAGacagggga        |
| V\$SREB | Sterol regulatory element binding proteins  | V\$SREBP.02   | Sterol regulatory element binding protein                     | 316  | 330  | 323  | (-) | 0.838 | cccTCCCccacc              |
| V\$HOMF | Homeodomain transcription factors           | V\$HMX1.01    | H6 family homeobox 1 / NKX5-3                                 | 544  | 562  | 553  | (-) | 0.838 | actataTAAATgcttgc         |
| V\$SORY | SOX/SRY-sex/testis determining and relat    | V\$HBP1.02    | HMG box-containing protein 1                                  | 1314 | 1336 | 1325 | (+) | 0.838 | gittattCAATaatattataga    |
| V\$BRN5 | Brn-5 POU domain factors                    | V\$POU6F2.01  | Retina-derived POU-domain factor-1, dimeric binding site      | 1835 | 1857 | 1846 | (+) | 0.838 | tgatgaacaaACTAaaataaa     |
| V\$DMRT | DM domain-containing transcription factor   | V\$DMRT5.01   | Doublesex and mab-3 related transcription factor 5            | 2191 | 2211 | 2201 | (-) | 0.838 | ctccactGTTAcactgcctct     |
| V\$HNF1 | Hepatic Nuclear Factor 1                    | V\$HMBOX.01   | Homeobox containing 1                                         | 802  | 818  | 810  | (-) | 0.837 | ctttctaGTTAcaaca          |
| VSLHXF  | Lim homeodomain factors                     | V\$SIL1.01    | Pancreatic and intestinal lim-homeodomain factor              | 857  | 879  | 868  | (+) | 0.837 | ttcttcagTAAAtaccagaag     |
| V\$HNF1 | Hepatic Nuclear Factor 1                    | V\$HNF1.01    | Hepatic nuclear factor 1                                      | 1313 | 1329 | 1321 | (+) | 0.837 | tGTTTAtcaataaat           |
| V\$PAX2 | PAX-2 binding sites                         | V\$PAX2.01    | Zebrafish PAX2 paired domain protein                          | 2004 | 2026 | 2015 | (+) | 0.837 | cccagtgctccctgggtAAAAt    |
| V\$P53F | p53 tumor suppressor                        | V\$TP63.01    | Tumor protein p63                                             | 2426 | 2450 | 2438 | (-) | 0.837 | gattataagtagttCATGtcaagt  |
| VSLHXF  | Lim homeodomain factors                     | V\$SIL1.01    | Pancreatic and intestinal lim-homeodomain factor              | 366  | 388  | 377  | (+) | 0.836 | atgacaagTAAAtgctacagca    |
| V\$BRN5 | Brn-5 POU domain factors                    | V\$BRN5.03    | Brn-5, POU-VI protein class (also known as emb and CNS)       | 567  | 589  | 578  | (-) | 0.836 | tTAAAtgagttactactagctacc  |
| V\$EV11 | EV11-myeloid transforming protein           | V\$EV11.06    | Ecotropic viral integration site 1 encoded factor, amino-term | 1302 | 1318 | 1310 | (-) | 0.836 | ataacaAGAAgaaat           |
| VSLHXF  | Lim homeodomain factors                     | V\$SIL1.01    | Pancreatic and intestinal lim-homeodomain factor              | 2623 | 2645 | 2634 | (-) | 0.836 | gaaggacagTAAAtggtcacagt   |
| VSLHXF  | Lim homeodomain factors                     | V\$SIL1.01    | Pancreatic and intestinal lim-homeodomain factor              | 2681 | 2703 | 2692 | (-) | 0.836 | agttgggtTAAAtgcccagctc    |
| V\$CLOX | CLOX and CLOX homology (CDP) factors        | V\$CLOX.01    | Cut-like homeodomain protein                                  | 158  | 180  | 169  | (+) | 0.835 | gcttcATCCatgcccctacaag    |
| V\$CEBP | Ccoaat/Enhancer Binding Protein             | V\$CEBPE.01   | CCAAT/enhancer binding protein (C/EBP), epsilon               | 254  | 268  | 261  | (-) | 0.835 | ctcattgTCAAttc            |
| V\$NR2F | Nuclear receptor subfamily 2 factors        | V\$HNF4.01    | Hepatic nuclear factor 4, DR1 sites                           | 1476 | 1500 | 1488 | (+) | 0.835 | ccagtaagagCAAAGatgaaata   |
| V\$CREB | cAMP-responsive element binding protein     | V\$BATF3.01   | Basic leucine zipper transcription factor, ATF-like 3         | 2066 | 2086 | 2076 | (-) | 0.835 | aggagATGttgctatcttt       |
| V\$PERO | Peroxisome proliferator-activated recepto   | V\$PPARG.03   | Peroxisome proliferator-activated receptor gamma, DR1 site    | 2237 | 2259 | 2248 | (-) | 0.835 | cagctgctctTAAAGgccacag    |
| V\$CAAT | CCAAT binding factors                       | V\$ACAAT.01   | Avian C-type LTR CCAAT box                                    | 71   | 85   | 78   | (+) | 0.834 | tccaTCAAAtgataga          |
| V\$ABDB | Abdominal-B type homeodomain transcrip      | V\$SHOX9.01   | Homeobox C9 / Hox-3beta                                       | 145  | 161  | 153  | (-) | 0.834 | aaaggacATGAActat          |
| V\$CART | Cart-1 (cartilage homeoprotein 1)           | V\$XVENT2.01  | Xenopus homeodomain factor Xvent-2; early BMP signaling       | 505  | 525  | 515  | (+) | 0.834 | cagacTCATatgtctattagg     |
| V\$BRN5 | Brn-5 POU domain factors                    | V\$BRN5.04    | POU class 6 homeobox 1 (POU6F1)                               | 2440 | 2462 | 2451 | (+) | 0.834 | tacttaaatATTAtttatcc      |
| V\$CEBP | Ccoaat/Enhancer Binding Protein             | V\$CEBPE.01   | CCAAT/enhancer binding protein (C/EBP), epsilon               | 253  | 267  | 260  | (+) | 0.833 | agaatgaACAAlga            |
| V\$EV11 | EV11-myeloid transforming protein           | V\$EV11.02    | Ecotropic viral integration site 1 encoded factor, amino-term | 1708 | 1724 | 1716 | (+) | 0.833 | gagagAAGatcagaa           |
| V\$SORY | SOX/SRY-sex/testis determining and relat    | V\$HBP1.02    | HMG box-containing protein 1                                  | 70   | 92   | 81   | (+) | 0.832 | gtccatCAATGatagactgatt    |
| V\$AP1R | MAF and AP1 related factors                 | V\$MAFF.01    | Transcription factor MafF                                     | 747  | 771  | 759  | (+) | 0.832 | taagtGCTGaaaagacttaaaaa   |
| V\$BRNF | Brn POU domain factors                      | V\$BRN3.03    | POU class 4 homeobox 3 (POU4F3), BRN3C                        | 1150 | 1168 | 1159 | (-) | 0.832 | ctgcttTAAAtaagcac         |
| V\$PRDF | Positive regulatory domain I binding factor | V\$PRDM1.02   | PRDI (positive regulatory domain I element) binding factor    | 1578 | 1596 | 1587 | (+) | 0.832 | ggagcagAAAGtgcctgc        |
| V\$PRDF | Positive regulatory domain I binding factor | V\$PRDM1.02   | PRDI (positive regulatory domain I element) binding factor    | 2029 | 2047 | 2038 | (+) | 0.832 | ccttaggGAAAGaattgctc      |
| V\$HZIP | Homeodomain-leucine zipper transcription    | V\$HOMEZ.01   | Homeobox and leucine zipper encoding transcription factor     | 2318 | 2332 | 2325 | (+) | 0.832 | ccaatATCGtctcatg          |
| V\$ABDB | Abdominal-B type homeodomain transcrip      | V\$SHOX10.01  | Homeobox C10/ Hox-3iota                                       | 1154 | 1170 | 1162 | (-) | 0.831 | ccctgcttTAAAtaga          |
| VSLHXF  | Lim homeodomain factors                     | VSLHX3.02     | LIM-homeodomain transcription factor LHX3                     | 2388 | 2410 | 2399 | (+) | 0.83  | acctgctcagTAAAtctgaaa     |
| V\$HNF6 | Onecut homeodomain factor HNF6              | V\$OC2.01     | CUT-homeodomain transcription factor Onecut-2                 | 2441 | 2457 | 2449 | (+) | 0.83  | acttatAATCAatttt          |
| V\$HOMF | Homeodomain transcription factors           | V\$HMX2.01    | Hmx2/Nkx5-2 homeodomain transcription factor                  | 2848 | 2866 | 2857 | (+) | 0.83  | ggggagagCTTAcggtgc        |
| V\$HOXC | HOX - PBX complexes                         | V\$HOX_PBX.01 | HOX/PBX binding sites                                         | 180  | 196  | 188  | (-) | 0.829 | agaaTGAgtggtccag          |
| V\$PAX2 | PAX-2 binding sites                         | V\$PAX2.01    | Zebrafish PAX2 paired domain protein                          | 2391 | 2413 | 2402 | (+) | 0.829 | tgtctcagttaatctgAAACtg    |
| V\$ZBED | Zinc finger BED domain-containing protein   | V\$ZBED1.02   | Zinc finger, BED-type containing 1                            | 160  | 172  | 166  | (+) | 0.828 | tTGTAggacatg              |

|          |                                                          |                    |                                                                |      |      |      |     |       |                               |
|----------|----------------------------------------------------------|--------------------|----------------------------------------------------------------|------|------|------|-----|-------|-------------------------------|
| V\$LEFF  | LEF1/TCF                                                 | V\$LEF1.03         | TCF/LEF-1                                                      | 1479 | 1495 | 1487 | (+) | 0.828 | gtaagaGCAAagatgaa             |
| V\$PAX7  | Paired box 7                                             | V\$PAX7.01         | Paired box 7 homeodomain-binding motif                         | 2284 | 2298 | 2291 | (-) | 0.828 | gtaaatGATGacca                |
| V\$BRAC  | Brachyury gene, mesoderm development                     | V\$MGA.01          | MAX gene associated, dimeric binding site                      | 276  | 304  | 290  | (+) | 0.827 | ggcacaggaagaggaaacctcACACaccg |
| V\$BHLH  | bHLH transcription factors expressed in muscle           | V\$BHLHA15.01      | Muscle, intestine and stomach expression 1 (MIST1)             | 654  | 666  | 660  | (-) | 0.827 | ttaccaTTTGica                 |
| V\$FAST  | FAST-1 SMAD interacting proteins                         | V\$FAST1.02        | Forkhead box H1 (Foxh1)                                        | 586  | 602  | 594  | (+) | 0.826 | ttaaTGtGttttcct               |
| V\$ZF12  | C2H2 zinc finger transcription factors 12                | V\$ZFP652.01       | Zinc finger protein 652 (ZNF652)                               | 826  | 840  | 833  | (+) | 0.826 | tataatggtTTAAaa               |
| V\$PRDF  | Positive regulatory domain 1 binding factor              | V\$BLIMP1.01       | Transcriptional repressor B lymphocyte-induced maturation      | 1959 | 1977 | 1968 | (-) | 0.826 | gcaaggaGAAAgagggtt            |
| V\$BHLH  | bHLH transcription factors expressed in muscle           | V\$BHLHA15.01      | Muscle, intestine and stomach expression 1 (MIST1)             | 2130 | 2142 | 2136 | (+) | 0.826 | ttccaTAGGgtt                  |
| V\$MYBL  | Cellular and viral myb-like transcriptional repressors   | V\$MYBL1.01        | V-myb avian myeloblastosis viral oncogene homolog-like 1       | 2399 | 2419 | 2409 | (+) | 0.826 | gttaactctgaaACTGtttgga        |
| V\$HOXF  | Paralog hox genes 1-8 from the four hox clusters         | V\$SHOX1-3.01      | Hox-1.3, vertebrate homeobox protein                           | 2441 | 2459 | 2450 | (-) | 0.826 | ataaaTAATgattataagt           |
| V\$HUB1  | HTLV-1 U5 repressive element-binding protein             | V\$ZNF282.01       | Zinc finger protein 282 (HTLV-1 U5 repressive element-binding) | 912  | 926  | 919  | (+) | 0.825 | TTTTccaacacagaa               |
| V\$OCT1  | Octamer binding protein                                  | V\$OCT.01          | Octamer binding site (OCT1/OCT2)                               | 2125 | 2139 | 2132 | (-) | 0.825 | cctATG Gaaaaaac               |
| V\$BHLH  | bHLH transcription factors expressed in muscle           | V\$BHLHA15.01      | Muscle, intestine and stomach expression 1 (MIST1)             | 228  | 240  | 234  | (-) | 0.824 | agaacaTGtGgtg                 |
| V\$STEM  | Motif composed of binding sites for pluripotency factors | V\$OCT3_4.01       | POU domain, class 5, transcription factor 1                    | 352  | 370  | 361  | (-) | 0.824 | gtcattACATtaggtgta            |
| V\$GABF  | GA-boxes                                                 | V\$GAGA.01         | GAGA-Box                                                       | 1682 | 1706 | 1694 | (+) | 0.824 | gtgggAGAGgggagaaggtataagg     |
| V\$E2F   | E2F-myc activator/cell cycle regulator                   | V\$RB_E2F1_DP1.01  | RBE2F-1/DP-1 heterotrimeric complex                            | 2038 | 2054 | 2046 | (-) | 0.824 | ctttCCG Caattctt              |
| V\$DMRT  | DM domain-containing transcription factor                | V\$DMRT5.01        | Doublesex and mab-3 related transcription factor 5             | 2193 | 2213 | 2203 | (+) | 0.824 | aggcagGTAAcagtgagtg           |
| V\$PRDF  | Positive regulatory domain 1 binding factor              | V\$BLIMP1.01       | Transcriptional repressor B lymphocyte-induced maturation      | 2337 | 2355 | 2346 | (+) | 0.824 | caaatGAAAgctttgaa             |
| V\$HOXF  | Paralog hox genes 1-8 from the four hox clusters         | V\$SHOXA4.01       | Homeobox A4                                                    | 2525 | 2543 | 2534 | (+) | 0.824 | ttataAATtataatgta             |
| V\$MYBL  | Cellular and viral myb-like transcriptional repressors   | V\$MYBL1.01        | V-myb avian myeloblastosis viral oncogene homolog-like 1       | 878  | 898  | 888  | (-) | 0.823 | gtcagctgtgaaACAGtttact        |
| V\$HOXH  | HOX - MEIS1 heterodimers                                 | V\$MEIS1B_HOXA9.01 | Meis1b and Hoxa9 form heterodimeric binding complexes d        | 1085 | 1099 | 1092 | (-) | 0.823 | TGGCactttacagc                |
| V\$OCT1  | Octamer binding protein                                  | V\$OCT.01          | Octamer binding site (OCT1/OCT2)                               | 1447 | 1461 | 1454 | (+) | 0.823 | caaATG Aaaaacaga              |
| OSVTBP   | Vertebrate TATA binding protein factor                   | OSLTATA.01         | Lentivirus LTR TATA box                                        | 1690 | 1706 | 1698 | (-) | 0.823 | cctTAT Aaccttccc              |
| V\$HOMF  | Homeodomain transcription factors                        | V\$HMX3.03         | H6 homeodomain HMX3/Nkx5.1 transcription factor                | 2285 | 2303 | 2294 | (-) | 0.823 | gataagTAATtgatgacc            |
| V\$SORY  | SOX/SRY-sex/testis determining and related factors       | V\$SOX21.02        | SRY (sex determining region Y)-box 21, dimeric binding site    | 734  | 756  | 745  | (-) | 0.822 | cagCAACTagaggttttagct         |
| V\$SETSF | Human and murine ETS1 factors                            | V\$ETV6.01         | Ets variant 6                                                  | 1232 | 1252 | 1242 | (-) | 0.822 | tgaagccTGAAGttttagac          |
| V\$OCT1  | Octamer binding protein                                  | V\$OCT1.06         | Octamer-binding factor 1                                       | 2289 | 2303 | 2296 | (-) | 0.822 | gataagtaAATTgat               |
| V\$NF1F  | Nuclear factor 1                                         | V\$NF1.01          | Nuclear factor 1                                               | 50   | 70   | 60   | (+) | 0.821 | gacTTGGaaccaccacatg           |
| V\$HOMF  | Homeodomain transcription factors                        | V\$HMX2.03         | Hmx2/Nkx5-2 homeodomain transcription factor                   | 580  | 598  | 589  | (+) | 0.821 | actcaTAAatgtttgt              |
| V\$RXRF  | RXR heterodimer binding sites                            | V\$RAR_RXR.01      | Retinoic acid receptor / retinoid X receptor heterodimer, DNA  | 985  | 1009 | 997  | (+) | 0.821 | aagggggtaaAGGCcaggggaagg      |
| V\$GATA  | GATA binding factors                                     | V\$GATA3.03        | GATA-binding protein 3                                         | 1904 | 1916 | 1910 | (+) | 0.821 | cacaGATAAcaggat               |
| V\$DMRT  | DM domain-containing transcription factor                | V\$DMRT4.01        | Doublesex and mab-3 related transcription factor 4             | 2797 | 2817 | 2807 | (+) | 0.821 | ctcaaatgATACagtaggagg         |
| V\$DMRT  | DM domain-containing transcription factor                | V\$DMRT7.01        | Doublesex and mab-3 related transcription factor 7             | 667  | 687  | 677  | (-) | 0.82  | ttttTTGttttattacc             |
| V\$HESF  | Vertebrate homologues of enhancer of split               | V\$BHLHB2.02       | Basic helix-loop-helix domain containing, class B, 2 (second)  | 1591 | 1605 | 1598 | (-) | 0.82  | gctccCGTgacagc                |
| V\$TALE  | TALE homeodomain class recognizing TGAGTCA               | V\$MRG1.02         | TALE homeobox protein Meis 2, dimeric binding site             | 884  | 900  | 892  | (-) | 0.819 | ttgtCAGCtgtgaacag             |
| V\$MYBL  | Cellular and viral myb-like transcriptional repressors   | V\$MYBL1.01        | V-myb avian myeloblastosis viral oncogene homolog-like 1       | 2405 | 2425 | 2415 | (-) | 0.819 | tttcttccaaACAGtttcaag         |
| V\$MYBL  | Cellular and viral myb-like transcriptional repressors   | V\$MYBL1.01        | V-myb avian myeloblastosis viral oncogene homolog-like 1       | 872  | 892  | 882  | (+) | 0.818 | cccagaagtaaACTGttcaca         |
| V\$CAAT  | CCAAT binding factors                                    | V\$SNFY.03         | Nuclear factor Y (Y-box binding factor)                        | 1793 | 1807 | 1800 | (-) | 0.818 | caatGCAAtcagtc                |
| V\$BRN5  | Brn-5 POU domain factors                                 | V\$BRN5.01         | Brn-5, POU-VI protein class (also known as emb and CNS)        | 2522 | 2544 | 2533 | (+) | 0.818 | gagttATATaattaaatgtaa         |
| V\$BRN5  | Brn-5 POU domain factors                                 | V\$BRN5.03         | Brn-5, POU-VI protein class (also known as emb and CNS)        | 363  | 385  | 374  | (+) | 0.817 | tAAATgacaagtaagcgtaca         |
| V\$HNF1  | Hepatic Nuclear Factor 1                                 | V\$HNF1.03         | Hepatic nuclear factor 1                                       | 2017 | 2033 | 2025 | (+) | 0.817 | gGT TAAAAagtcctta             |
| V\$ZF12  | C2H2 zinc finger transcription factors 12                | V\$ZFP652.01       | Zinc finger protein 652 (ZNF652)                               | 2172 | 2186 | 2179 | (+) | 0.816 | tggttagggTTAAgt               |
| V\$MYOD  | Myoblast determining factors                             | V\$TCF21.01        | Podocyte-expressed 1 (POD1)                                    | 2381 | 2397 | 2389 | (-) | 0.816 | agggcaacaCCTGtctgt            |
| V\$FKHD  | Fork head domain factors                                 | V\$FREAC4.01       | Fork head related activator-4 (FOX D1)                         | 399  | 415  | 407  | (-) | 0.815 | cataggtAACATgtgc              |
| V\$CLOX  | CLOX and CLOX homology (CDP) factors                     | V\$CLOX.01         | Cut-like homeodomain protein                                   | 2318 | 2340 | 2329 | (+) | 0.815 | ccataATCGTcatgactgcaat        |
| V\$ATBF  | AT-binding transcription factor                          | V\$ATBF1.01        | AT-binding transcription factor 1                              | 2528 | 2544 | 2536 | (-) | 0.815 | ttacattataAATTata             |
| V\$OCT1  | Octamer binding protein                                  | V\$POU3F3.01       | POU class 3 homeobox 3 (POU3F3), OTF8                          | 1340 | 1354 | 1347 | (-) | 0.814 | ctagtGCATagtaag               |
| V\$PRDF  | Positive regulatory domain 1 binding factor              | V\$BLIMP1.01       | Transcriptional repressor B lymphocyte-induced maturation      | 1877 | 1895 | 1886 | (-) | 0.814 | agcaaaGAAAgctatgag            |
| V\$BRN5  | Brn-5 POU domain factors                                 | V\$BRN5.01         | Brn-5, POU-VI protein class (also known as emb and CNS)        | 2444 | 2466 | 2455 | (-) | 0.814 | aaatggAATAAaataatgattata      |
| V\$AIRE  | Autoimmune regulatory element binding factors            | V\$AIRE.02         | Autoimmune regulator                                           | 687  | 701  | 694  | (+) | 0.813 | aaaggtataTTTgt                |
| V\$ZF12  | C2H2 zinc finger transcription factors 12                | V\$ZNF652.02       | Zinc finger protein 652 (ZNF652)                               | 1914 | 1928 | 1921 | (-) | 0.813 | gagtagAGGTaatc                |
| V\$PAX2  | PAX-2 binding sites                                      | V\$PAX2.01         | Zebrafish PAX2 paired domain protein                           | 2485 | 2507 | 2496 | (-) | 0.813 | atgacgtctcctaatacAAACaa       |
| V\$ZF12  | C2H2 zinc finger transcription factors 12                | V\$ZFP652.01       | Zinc finger protein 652 (ZNF652)                               | 756  | 770  | 763  | (+) | 0.812 | gaaaaagctTTAAaa               |
| V\$BRN5  | Brn-5 POU domain factors                                 | V\$BRN5.01         | Brn-5, POU-VI protein class (also known as emb and CNS)        | 2444 | 2466 | 2455 | (+) | 0.812 | tataaCATTattattccatt          |
| V\$TALE  | TALE homeodomain class recognizing TGAGTCA               | V\$TGIF2.01        | TGFB-induced factor homeobox 2, TALE homeobox TG-in            | 650  | 666  | 658  | (-) | 0.811 | ttaccattGTCAagtt              |
| V\$PAX2  | PAX-2 binding sites                                      | V\$PAX2.01         | Zebrafish PAX2 paired domain protein                           | 722  | 744  | 733  | (+) | 0.811 | cagaccagatagactaAAACac        |
| V\$RREB  | Ras-responsive element binding protein                   | V\$RREB1.01        | Ras-responsive element binding protein 1                       | 1539 | 1553 | 1546 | (-) | 0.811 | ICCCtAaccaccacaa              |
| V\$HNF1  | Hepatic Nuclear Factor 1                                 | V\$HNF1.01         | Hepatic nuclear factor 1                                       | 2398 | 2414 | 2406 | (+) | 0.811 | agTTAatctgaaactgt             |
| V\$PIT1  | GHF-1 pituitary specific pou domain transcription factor | V\$PIT1.02         | POU domain, class 1, transcription factor 1 (POU1F1) / Pit     | 2446 | 2460 | 2453 | (-) | 0.811 | ataaaTAATgattata              |
| V\$PIT1  | GHF-1 pituitary specific pou domain transcription factor | V\$PIT1.02         | POU domain, class 1, transcription factor 1 (POU1F1) / Pit     | 2447 | 2461 | 2454 | (+) | 0.811 | aatcaTTATttattc               |
| V\$OVOL  | OVO homolog-like transcription factors                   | V\$OVOL1.01        | Zinc finger transcription factor OVO homolog-like 1            | 2853 | 2867 | 2860 | (-) | 0.811 | agcaccGTAAgatct               |
| V\$XBBF  | X-box binding factors                                    | V\$RFX4.03         | Regulatory factor X 4                                          | 947  | 965  | 956  | (+) | 0.81  | gggGTGctttggatcctg            |
| V\$DMRT  | DM domain-containing transcription factor                | V\$DMRT1.01        | Doublesex and mab-3 related transcription factor 1             | 1969 | 1989 | 1979 | (+) | 0.81  | ttctctgcaagaTTGTtctt          |
| V\$DMRT  | DM domain-containing transcription factor                | V\$DMRT3.01        | Doublesex and mab-3 related transcription factor 3             | 797  | 817  | 807  | (-) | 0.808 | tttctagTACAcagctag            |
| V\$BRNF  | Brn POU domain factors                                   | V\$BRN3.01         | Brn-3, POU-IV protein class                                    | 69   | 87   | 78   | (+) | 0.807 | tgcttcaCATgtagact             |
| V\$OVOL  | OVO homolog-like transcription factors                   | V\$OVOL1.01        | Zinc finger transcription factor OVO homolog-like 1            | 823  | 837  | 830  | (-) | 0.807 | taaacATTAtatgt                |
| V\$BCL6  | POZ domain zinc finger expressed in B-cells              | V\$BCL6.03         | B-cell CLL/lymphoma 6, member B (BCL6B)                        | 1178 | 1194 | 1186 | (+) | 0.807 | atgttcTG GAcaggtta            |

|         |                                               |                    |                                                               |      |      |      |     |       |                                |
|---------|-----------------------------------------------|--------------------|---------------------------------------------------------------|------|------|------|-----|-------|--------------------------------|
| V\$BRN5 | Brn-5 POU domain factors                      | V\$BRN5.01         | Brn-5, POU-VI protein class (also known as emb and CNS        | 2522 | 2544 | 2533 | (-) | 0.807 | ttacatTATAaattataaact          |
| V\$PBXC | PBX - MEIS complexes                          | V\$PBX1_MEIS1.03   | Binding site for a Pbx1/Meis1 heterodimer                     | 75   | 91   | 83   | (+) | 0.806 | tcfaatgatAGACttgat             |
| V\$HNF1 | Hepatic Nuclear Factor 1                      | V\$HNF1.03         | Hepatic nuclear factor 1                                      | 458  | 474  | 466  | (+) | 0.806 | gTTTAAatagtagaaa               |
| V\$SRFF | Serum response element binding factor         | V\$SRFF.05         | Serum response factor                                         | 2257 | 2275 | 2266 | (+) | 0.806 | ctgcccgagAAGGtacct             |
| V\$PDX1 | Pancreatic and intestinal homeodomain tra     | V\$PDX1.01         | Pdx1 (IDX1/1PF1) pancreatic and intestinal homeodomain T      | 2283 | 2301 | 2292 | (-) | 0.806 | taagttaatTGATgaccaa            |
| V\$PAX2 | PAX-2 binding sites                           | V\$PAX2.01         | Zebrafish PAX2 paired domain protein                          | 2407 | 2429 | 2418 | (+) | 0.806 | gaaactgttgggaaggaAAACtt        |
| OSVTBP  | Vertebrate TATA binding protein factor        | OSATATA.01         | Avian C-type LTR TATA box                                     | 804  | 820  | 812  | (+) | 0.805 | ttgtaacTAAGaaagcc              |
| V\$CREB | cAMP-responsive element binding protein       | V\$E4BP4.01        | E4BP4, bZIP domain, transcriptional repressor                 | 2288 | 2308 | 2298 | (-) | 0.805 | tcacagataaGTAaattgatg          |
| V\$XBBF | X-box binding factors                         | V\$MIF1.01         | MIBP1 / RFX1 complex                                          | 2396 | 2414 | 2405 | (+) | 0.805 | tgagttaactGAAActgt             |
| V\$ZF16 | C2H2 zinc finger transcription factors 16     | V\$SPRDM15.01      | PR/SET domain 15                                              | 2116 | 2130 | 2123 | (-) | 0.804 | aaaatcagaatGGGA                |
| V\$CREB | cAMP-responsive element binding protein       | V\$BATF3.01        | Basic leucine zipper transcription factor, ATF-like 3         | 426  | 446  | 436  | (+) | 0.803 | gcacGTTGtggtcattgacc           |
| V\$MYBL | Cellular and viral myb-like transcriptional r | V\$MYBL2.01        | v-myb myeloblastosis viral oncogene homolog (avian)-like      | 798  | 818  | 808  | (+) | 0.803 | tagctgttGTAACtaagaag           |
| V\$PAX7 | Paired box 7                                  | V\$PAX7.01         | Paired box 7 homeodomain-binding motif                        | 826  | 840  | 833  | (+) | 0.803 | tataatGTTTaaaa                 |
| V\$BRN5 | Brn-5 POU domain factors                      | V\$BRN5.02         | Brn-5, POU-VI protein class (also known as emb and CNS        | 519  | 541  | 530  | (-) | 0.802 | gtaactattgATTCTcctaata         |
| V\$NR2F | Nuclear receptor subfamily 2 factors          | V\$TR2_TR4.01      | DR1 binding sites for TR2 homodimers or TR2/TR4 hetero        | 1040 | 1064 | 1052 | (+) | 0.802 | tcagaatagacacaGTCattctca       |
| V\$HOXH | HOX - MEIS1 heterodimers                      | V\$MEIS1B_HOXA9.01 | Meis1b and Hoxa9 form heterodimeric binding complexes c       | 171  | 185  | 178  | (-) | 0.801 | TGCCagctcatocca                |
| V\$SORY | SOX/SRY-sex/testis determining and relat      | V\$SOX9.03         | SRY (sex determining region Y)-box 9 homodimer                | 1140 | 1162 | 1151 | (+) | 0.801 | aaACACagagagctcttataa          |
| V\$NR2F | Nuclear receptor subfamily 2 factors          | V\$TR2.01          | Nuclear hormone receptor TR2, DR5 binding sites               | 2621 | 2645 | 2633 | (-) | 0.801 | gaaggacagtatGTTcagactc         |
| V\$STAF | Selenocysteine tRNA activating factor         | V\$STAF.01         | Se-Cys tRNA gene transcription activating factor              | 621  | 651  | 636  | (-) | 0.8   | ttagttctgtgtCCCACAcaaccaccgatt |
| V\$FXRE | Farnesoid X - activated receptor response     | V\$FXRE.01         | Farnesoid X - activated receptor (RXR/FXR dimer), IR1 sit     | 786  | 798  | 792  | (+) | 0.8   | AGGgtactgcctc                  |
| V\$FKHD | Fork head domain factors                      | V\$FREAC4.01       | Fork head related activator-4 (FOX D1)                        | 874  | 890  | 882  | (+) | 0.8   | cagaagtaAACgttca               |
| V\$SORY | SOX/SRY-sex/testis determining and relat      | V\$SOX1.04         | SRY (sex determining region Y)-box 1, dimeric binding sites   | 1312 | 1334 | 1323 | (-) | 0.8   | tataAATatttttagtaatacaa        |
| V\$ATBF | AT-binding transcription factor               | V\$ATBF1.01        | AT-binding transcription factor 1                             | 2444 | 2460 | 2452 | (+) | 0.8   | tataactattATTtatt              |
| V\$SORY | SOX/SRY-sex/testis determining and relat      | V\$SOX1.04         | SRY (sex determining region Y)-box 1, dimeric binding sites   | 1317 | 1339 | 1328 | (+) | 0.799 | attCAATaaattatitagacta         |
| V\$HOXH | HOX - MEIS1 heterodimers                      | V\$MEIS1B_HOXA9.01 | Meis1b and Hoxa9 form heterodimeric binding complexes c       | 2685 | 2699 | 2692 | (-) | 0.799 | TGGCacattaaccc                 |
| V\$PARF | PAR/bZIP family                               | V\$TEF_HLF.01      | Thyrotrophic embryonic factor / hepatic leukemia factor       | 1543 | 1559 | 1551 | (-) | 0.798 | ctgacTTCcctaaccac              |
| V\$CREB | cAMP-responsive element binding protein       | V\$BATF3.01        | Basic leucine zipper transcription factor, ATF-like 3         | 1945 | 1965 | 1955 | (-) | 0.798 | aggtGTTGaggtctgacgca           |
| V\$PAX2 | PAX-2 binding sites                           | V\$PAX2.01         | Zebrafish PAX2 paired domain protein                          | 853  | 853  | 842  | (-) | 0.796 | taaacgcccatcttttAAACca         |
| V\$PAX2 | PAX-2 binding sites                           | V\$PAX2.01         | Zebrafish PAX2 paired domain protein                          | 121  | 143  | 132  | (+) | 0.795 | aatactgtcacgccataAAAAgt        |
| V\$EV11 | EV11-myeoid transforming protein              | V\$EV11.03         | Ecotropic viral integration site 1 encoded factor, amino-term | 1272 | 1288 | 1280 | (+) | 0.795 | aagctAACAtaacctc               |
| V\$RXRF | RXR heterodimer binding sites                 | V\$VDR_RXR.05      | Bipartite binding site of VDR/RXR heterodimers, DR4 sites     | 1691 | 1715 | 1703 | (+) | 0.795 | ggaGAAGgttataaggggagagaag      |
| V\$BRN5 | Brn-5 POU domain factors                      | V\$BRN5.03         | Brn-5, POU-VI protein class (also known as emb and CNS        | 1824 | 1846 | 1835 | (+) | 0.795 | cCAATgagtgatgaatgaacaaa        |
| V\$SORY | SOX/SRY-sex/testis determining and relat      | V\$SOX9.03         | SRY (sex determining region Y)-box 9 homodimer                | 1874 | 1896 | 1885 | (-) | 0.795 | aaGCAaaggaagctatgaggt          |
| V\$SNAP | snRNA-activating protein complex              | V\$PSE.02          | Proximal sequence element (PSE) of RNA polymerase III-t       | 2166 | 2184 | 2175 | (-) | 0.795 | ttaacCCTAaccaagagtg            |
| V\$EV11 | EV11-myeoid transforming protein              | V\$EV11.03         | Ecotropic viral integration site 1 encoded factor, amino-term | 2289 | 2305 | 2297 | (-) | 0.795 | cagatAAGTaatgatg               |
| V\$DMRT | DM domain-containing transcription factor     | V\$DMRT4.01        | Doublesex and mab-3 related transcription factor 4            | 2685 | 2705 | 2695 | (-) | 0.795 | ttgagctggCACAttaaccac          |
| V\$CLOX | CLOX and CLOX homology (CDP) factors          | V\$CUX1.01         | Cut-like homeobox 1, dimeric binding site                     | 69   | 91   | 80   | (+) | 0.794 | tgctcatCAATgatagactggat        |
| V\$HOXC | HOX - PBX complexes                           | V\$PBX_HOXA9.01    | PBX - HOXA9 binding site                                      | 2641 | 2657 | 2649 | (-) | 0.794 | gccatGTTttaggaag               |
| V\$SORY | SOX/SRY-sex/testis determining and relat      | V\$SOX1.04         | SRY (sex determining region Y)-box 1, dimeric binding sites   | 2581 | 2603 | 2592 | (+) | 0.793 | tttGAATtccaaaactgggct          |
| V\$DMRT | DM domain-containing transcription factor     | V\$DMRT1.01        | Doublesex and mab-3 related transcription factor 1            | 2778 | 2798 | 2788 | (+) | 0.793 | gtgagatggtaaaATGtgct           |
| V\$PARF | PAR/bZIP family                               | V\$TEF_HLF.01      | Thyrotrophic embryonic factor / hepatic leukemia factor       | 455  | 471  | 463  | (-) | 0.792 | tactatTATAaacctt               |
| V\$MOKF | Mouse Krueppel like factor                    | V\$MOK2.01         | Ribonucleoprotein associated zinc finger protein MOK-2 (m     | 744  | 764  | 754  | (-) | 0.792 | gtcttttcagcaACTTtag            |
| V\$AIRE | Autoimmune regulatory element binding fa      | V\$AIRE.01         | Autoimmune regulator                                          | 859  | 873  | 866  | (-) | 0.792 | ggTtTAcattggag                 |
| V\$NR2F | Nuclear receptor subfamily 2 factors          | V\$HFP1.01         | HepG2-specific P450 2C factor-1, DR1 sites                    | 1879 | 1903 | 1891 | (-) | 0.792 | ccaagtaaacAAAGaaagctatg        |
| V\$HBOX | Homeobox transcription factors                | V\$EN1.01          | Homeobox protein engrailed (en-1)                             | 1106 | 1124 | 1115 | (-) | 0.791 | ctggccagTTCaagtgtag            |
| V\$ZF14 | C2H2 zinc finger transcription factors 14     | V\$ZNF232.01       | Zinc finger protein 232 (ZSCAN11)                             | 2705 | 2723 | 2714 | (+) | 0.791 | aaGTTAAatggggagtag             |
| V\$STAF | Selenocysteine tRNA activating factor         | V\$ZNF76_143.01    | ZNF143 is the human ortholog of Xenopus Staf, ZNF76 is a      | 1718 | 1748 | 1733 | (-) | 0.79  | ctacaagctcctCCAGctgccttctgat   |
| V\$NFAT | Nuclear factor of activated T-cells           | V\$NFATC1.01       | Nuclear factor of activated T-cells, cytoplasmic, calcineurin | 1894 | 1912 | 1903 | (+) | 0.79  | ctttacTTGCaagattaa             |
| V\$XBBF | X-box binding factors                         | V\$RFX2.01         | Regulatory factor X 2                                         | 1989 | 2007 | 1998 | (+) | 0.79  | tagtgcCTTggtagccca             |
| V\$NFAT | Nuclear factor of activated T-cells           | V\$NFATC1.01       | Nuclear factor of activated T-cells, cytoplasmic, calcineurin | 106  | 124  | 115  | (-) | 0.788 | tattccATGGtgatattgt            |
| V\$ZBED | Zinc finger BED domain-containing protein     | V\$ZBED1.02        | Zinc finger, BED-type containing 1                            | 159  | 171  | 165  | (-) | 0.787 | aTGTcctcaaaa                   |
| V\$OCT1 | Octamer binding protein                       | V\$OCT.01          | Octamer binding site (OCT1/OCT2)                              | 1091 | 1105 | 1098 | (+) | 0.787 | aagATGCcaagaaaa                |
| V\$GZF1 | GDNF-inducible zinc finger gene 1             | V\$GZF1.01         | GDNF-inducible zinc finger protein 1 (ZNF336)                 | 1290 | 1302 | 1296 | (-) | 0.787 | TGGGcttatatt                   |
| V\$PARF | PAR/bZIP family                               | V\$TEF_HLF.01      | Thyrotrophic embryonic factor / hepatic leukemia factor       | 2582 | 2598 | 2590 | (+) | 0.787 | ttgaaTTCaaaactc                |
| V\$PAX2 | PAX-2 binding sites                           | V\$PAX2.01         | Zebrafish PAX2 paired domain protein                          | 740  | 762  | 751  | (+) | 0.786 | aacacttaagttgctgAAAag          |
| V\$PBXC | PBX - MEIS complexes                          | V\$PBX1_MEIS1.02   | Binding site for a Pbx1/Meis1 heterodimer                     | 1178 | 1194 | 1186 | (+) | 0.786 | atgTTCCTggacagtagta            |
| V\$HEAT | Heat shock factors                            | V\$HSF1.04         | Heat shock factor 1                                           | 1581 | 1605 | 1593 | (-) | 0.786 | gcttccgtgagggcactTTCTgct       |
| V\$BRN5 | Brn-5 POU domain factors                      | V\$POU6F2.01       | Retina-derived POU-domain factor-1, dimeric binding site      | 2526 | 2548 | 2537 | (-) | 0.786 | taaataactattATAAattatata       |
| V\$PAX9 | PAX-9 binding sites                           | V\$PAX9.01         | Zebrafish PAX9 binding sites                                  | 235  | 255  | 245  | (+) | 0.785 | tgttctcactcacaGGTGaga          |
| V\$PARF | PAR/bZIP family                               | V\$TEF_HLF.01      | Thyrotrophic embryonic factor / hepatic leukemia factor       | 2533 | 2549 | 2541 | (-) | 0.785 | ataaaTTACattataa               |
| V\$BRNF | Brn POU domain factors                        | V\$BRN3.01         | Brn-3, POU-IV protein class                                   | 133  | 151  | 142  | (-) | 0.784 | aactcatcATTTtatgg              |
| V\$DUXF | Double homeobox factors                       | V\$DUX4.01         | Double homeobox protein 4                                     | 1795 | 1809 | 1802 | (+) | 0.784 | actGATTgcattgta                |
| V\$EV11 | EV11-myeoid transforming protein              | V\$EV11.03         | Ecotropic viral integration site 1 encoded factor, amino-term | 2095 | 2111 | 2103 | (-) | 0.784 | ttgaaCAGAatagacaa              |
| V\$PAX2 | PAX-2 binding sites                           | V\$PAX2.01         | Zebrafish PAX2 paired domain protein                          | 456  | 478  | 467  | (-) | 0.783 | ttttttactattataAAACtt          |
| V\$HEAT | Heat shock factors                            | V\$HSF1.03         | Heat shock factor 1                                           | 1466 | 1490 | 1478 | (+) | 0.782 | acagtagataccAGTAagagcaag       |
| V\$PROX | Prospero-related homeobox                     | V\$PROX1.01        | Prospero homeobox protein 1, dimeric binding site             | 2722 | 2734 | 2728 | (-) | 0.782 | ccaGACAcctct                   |
| OSVTBP  | Vertebrate TATA binding protein factor        | OSATATA.01         | Avian C-type LTR TATA box                                     | 2523 | 2539 | 2531 | (+) | 0.781 | agtataTAATtataa                |

|         |                                               |                  |                                                               |      |      |      |     |       |                                |
|---------|-----------------------------------------------|------------------|---------------------------------------------------------------|------|------|------|-----|-------|--------------------------------|
| V\$PROX | Prospero-related homeobox                     | V\$PROX1.01      | Prospero homeobox protein 1, dimeric binding site             | 897  | 909  | 903  | (-) | 0.78  | cgaGCCGcctgt                   |
| V\$DUXF | Double homeobox factors                       | V\$DUX4.01       | Double homeobox protein 4                                     | 2488 | 2502 | 2495 | (+) | 0.78  | tttGATTaggagaca                |
| V\$BCL6 | POZ domain zinc finger expressed in B-C       | V\$BCL6.02       | POZ/zinc finger protein, transcriptional repressor, transloc  | 1244 | 1260 | 1252 | (-) | 0.779 | ttgttttTTGAagacct              |
| V\$MYT1 | MYT1 C2HC zinc finger protein                 | V\$MYT1.01       | MyT1 zinc finger transcription factor involved in primary ne  | 1269 | 1281 | 1275 | (+) | 0.777 | acaAAGCaaacat                  |
| V\$HEAT | Heat shock factors                            | V\$HSF1.02       | Heat shock factor 1                                           | 701  | 725  | 713  | (-) | 0.776 | tctgcttgCCAGaaactactaca        |
| V\$ZTRE | Zinc transcriptional regulatory element       | V\$ZTRE.02       | ZTRE motifs (2 bp spacer), ZNF658 binding site                | 2510 | 2526 | 2518 | (-) | 0.776 | aaCTCCccttgaaggggt             |
| V\$PBXC | PBX - MEIS complexes                          | V\$PBX1_MEIS1.02 | Binding site for a Pbx1/Meis1 heterodimer                     | 177  | 193  | 185  | (-) | 0.775 | atgaTGGTgccagctt               |
| V\$MEF2 | MEF2, myocyte-specific enhancer binding       | V\$MEF2.01       | Myocyte-specific enhancer factor 2                            | 2012 | 2034 | 2023 | (+) | 0.775 | cccctgtTAAaAatggccttag         |
| V\$BRN5 | Brn-5 POU domain factors                      | V\$BRN5.02       | Brn-5, POU-VI protein class (also known as emb and CNS        | 509  | 531  | 520  | (+) | 0.774 | ctcatatgctATTAggagaaac         |
| V\$HUB1 | HTLV-I U5 repressive element-binding pro      | V\$ZNF282.01     | Zinc finger protein 282 (HTLV-I U5 repressive element-binc    | 2038 | 2052 | 2045 | (-) | 0.774 | TTTTcgcgaattct                 |
| V\$CLOX | CLOX and CLOX homology (CDP) factors          | V\$CUX2.01       | Cut-like homeobox 2, dimeric binding site                     | 74   | 96   | 85   | (-) | 0.773 | tttaacccagctatcaTTGAT          |
| V\$SORY | SOX/SRY-sex/testis determining and relat      | V\$SOX9.06       | SRY (sex-determining region Y) box 9, dimeric binding sites   | 492  | 514  | 503  | (-) | 0.773 | tatgagctgATGCTAttctc           |
| V\$STAT | Signal transducer and activator of transcr    | V\$STAT1.01      | Signal transducer and activator of transcription 1            | 974  | 992  | 983  | (+) | 0.773 | taggtagcGGAGggggga             |
| V\$ZF12 | C2H2 zinc finger transcription factors 12     | V\$ZFP652.01     | Zinc finger protein 652 (ZNF652)                              | 329  | 343  | 336  | (+) | 0.772 | ggcgcagggATAAca                |
| V\$SNAP | snRNA-activating protein complex              | V\$PSE.02        | Proximal sequence element (PSE) of RNA polymerase III-t       | 1018 | 1036 | 1027 | (-) | 0.772 | atgctCTTAAaagaattt             |
| V\$EV11 | EV11-myeoid transforming protein              | V\$EV11.01       | Ecotropic viral integration site 1 encoded factor, amino-term | 1710 | 1726 | 1718 | (+) | 0.772 | gagaaGAGAlcagaag               |
| V\$ZF01 | C2H2 zinc finger transcription factors 1      | V\$ZBRK1.01      | Transcription factor with 8 central zinc fingers and an N-ter | 2611 | 2635 | 2623 | (-) | 0.772 | aatggcttACAGtcctttatcaaa       |
| V\$ZF14 | C2H2 zinc finger transcription factors 14     | V\$ZNF232.01     | Zinc finger protein 232 (ZSCAN11)                             | 2784 | 2802 | 2793 | (+) | 0.772 | tgTAAaagtggctcaaa              |
| V\$PAX6 | PAX-4/PAX-6 paired domain binding sites       | V\$PAX6.03       | Pax-6 paired domain binding site                              | 1920 | 1938 | 1929 | (+) | 0.771 | ccctACTCatccttgca              |
| V\$RXRF | RXR heterodimer binding sites                 | V\$LXRE.02       | Highly conserved DR1 element selected by LXRbeta/RXR          | 2695 | 2719 | 2707 | (+) | 0.77  | tgccaGCTCaaagttaaaggagg        |
| V\$HEAT | Heat shock factors                            | V\$HSF1.03       | Heat shock factor 1                                           | 2812 | 2836 | 2824 | (-) | 0.769 | cctgtgagcctGGAAaatcctct        |
| V\$PAX6 | PAX-4/PAX-6 paired domain binding sites       | V\$PAX6.01       | Pax-6 paired domain binding site                              | 369  | 387  | 378  | (-) | 0.768 | gctgACGCalttaactgt             |
| V\$AIRE | Autoimmune regulatory element binding fa      | V\$AIRE.02       | Autoimmune regulator                                          | 2176 | 2190 | 2183 | (+) | 0.767 | tagggtaagTTTGA                 |
| V\$PRDM | PR (PRDI-BF1-RIZ1 homologous) domain          | V\$PRDM4.01      | PR domain zinc finger protein 4 (PFM1)                        | 2815 | 2843 | 2829 | (+) | 0.766 | aggatTTTCcagcctccacaggagttt    |
| V\$XBBF | X-box binding factors                         | V\$MIF1.01       | MIBP1 / RFX1 complex                                          | 2358 | 2376 | 2367 | (+) | 0.763 | taagattttaGTAActca             |
| V\$ZTRE | Zinc transcriptional regulatory element       | V\$ZTRE.01       | ZTRE motifs (1 bp spacer), ZNF658 binding site                | 2512 | 2528 | 2520 | (+) | 0.763 | cctccagGGGAgttat               |
| V\$SORY | SOX/SRY-sex/testis determining and relat      | V\$SOX8.02       | SRY (sex determining region Y)-box 8, dimeric binding sites   | 144  | 166  | 155  | (+) | 0.762 | gatGAGTtcatgctctttagg          |
| V\$BRN5 | Brn-5 POU domain factors                      | V\$BRN5.03       | Brn-5, POU-VI protein class (also known as emb and CNS        | 663  | 685  | 674  | (+) | 0.762 | gTAAAgataaaataaaacaaaaa        |
| V\$AP1R | MAF and AP1 related factors                   | V\$MARE_ARE.01   | Antioxidant response elements                                 | 1052 | 1076 | 1064 | (-) | 0.762 | ggctatgctggGTGAgaatgagctg      |
| V\$HEAT | Heat shock factors                            | V\$HSF1.04       | Heat shock factor 1                                           | 1597 | 1621 | 1609 | (-) | 0.762 | gaccttgccttgcagcTTCCcgt        |
| V\$HEAT | Heat shock factors                            | V\$HSF1.04       | Heat shock factor 1                                           | 1967 | 1991 | 1979 | (+) | 0.762 | tttctccttgaagattTCTtag         |
| V\$NR2F | Nuclear receptor subfamily 2 factors          | V\$HNF4.02       | Hepatic nuclear factor 4, DR2 sites                           | 2234 | 2258 | 2246 | (-) | 0.762 | agctggccttAAAGgccacagcct       |
| V\$STAF | Selenocysteine tRNA activating factor         | V\$ZNF76_143.01  | ZNF143 is the human ortholog of Xenopus Staf, ZNF76 is a      | 2002 | 2032 | 2017 | (-) | 0.761 | aaggccattttaACCAGgggacactggcct |
| V\$PERO | Peroxisome proliferator-activated recepto     | V\$PPAR_RXR.01   | PPAR/RXR heterodimers, DR1 sites                              | 2692 | 2714 | 2703 | (+) | 0.76  | atlgccagctcaaAGTTaatg          |
| V\$ZTRE | Zinc transcriptional regulatory element       | V\$ZTRE.02       | ZTRE motifs (2 bp spacer), ZNF658 binding site                | 2766 | 2782 | 2774 | (-) | 0.759 | ctCACcacaaggggtga              |
| V\$SNAP | snRNA-activating protein complex              | V\$PSE.02        | Proximal sequence element (PSE) of RNA polymerase III-t       | 2126 | 2144 | 2135 | (-) | 0.758 | taaacCCTAtggaaaaaat            |
| V\$BRAC | Brachyury gene, mesoderm development          | V\$MGA.01        | MAX gene associated, dimeric binding site                     | 623  | 651  | 637  | (-) | 0.757 | ttagttcctgtgtcccacaacACACcgca  |
| V\$MYT1 | MYT1 C2HC zinc finger protein                 | V\$MYT1.01       | MyT1 zinc finger transcription factor involved in primary ne  | 2422 | 2434 | 2428 | (+) | 0.756 | gaaAACTgacat                   |
| V\$E2FF | E2F-myc activator/cell cycle regulator        | V\$E2F.01        | E2F, involved in cell cycle regulation, interacts with Rb p10 | 1783 | 1799 | 1791 | (-) | 0.755 | tcagtgctgGAAAtgc               |
| V\$CART | Cart-1 (cartilage homeoprotein 1)             | V\$HESX1.01      | HESX homeobox 1, dimeric binding site                         | 1892 | 1912 | 1902 | (+) | 0.755 | tgctTACTTggcaagatta            |
| V\$MYBL | Cellular and viral myb-like transcriptional r | V\$MYBL2.01      | v-myb myeloblastosis viral oncogene homolog (avian)-like      | 1267 | 1287 | 1277 | (+) | 0.752 | caacaagcTAAcataaactc           |
| V\$PRDM | PR (PRDI-BF1-RIZ1 homologous) domain          | V\$PRDM5.01      | PR domain containing 5                                        | 1694 | 1722 | 1708 | (+) | 0.751 | gaagttatAAGGggagagaagatcag     |

Supplementary Table 4. siRNA sets used in this study relate to Figs. 1, 3; Extended Data Figs. 2, 3, 5, 9

| Product Description                       | Catalog Number   | Clonelds    | ishRNA sequences         | Reference                                                    |
|-------------------------------------------|------------------|-------------|--------------------------|--------------------------------------------------------------|
| ON-TARGETplus Human NAPRT siRNA #1        | L-016912-01-0005 | L-016912-09 | GCAACAACAUUGACGAGGA      | Dharmacon                                                    |
| ON-TARGETplus Human NAPRT siRNA #2        |                  | L-016912-10 | CUGGAAACAACACGAAUCA      | Dharmacon                                                    |
| ON-TARGETplus Human NAPRT siRNA #3        |                  | L-016912-11 | GGUAGAGCCCUGACUGGGA      | Dharmacon                                                    |
| ON-TARGETplus Human NAPRT siRNA #4        |                  | L-016912-12 | GGACAGUGGUGACCUGCUA      | Dharmacon                                                    |
| Silencer® Select Human NAPRT siRNA #5     |                  | s195572     | GAAUGAAGCUGACCGAGGAtt    | Ambion-ThermoFischer Scientific                              |
| ON-TARGETplus Human NAMPT siRNA #1        | L-004581-00-0005 | J-004581-05 | GGUAAGAAGUUUCCUGUUA      | Dharmacon                                                    |
| ON-TARGETplus Human NAMPT siRNA #2        |                  | J-004581-06 | CAAUUUGGAUUGAGACUAU      | Dharmacon                                                    |
| ON-TARGETplus Human NAMPT siRNA #3        |                  | J-004581-07 | UAACUUAGAUGGUCUGGAA      | Dharmacon                                                    |
| ON-TARGETplus Human NAMPT siRNA #4        |                  | J-004581-08 | CAAGCAAAGUUUUAUCCUA      | Dharmacon                                                    |
| Silencer® Select Human NAMPT siRNA #5     |                  | s19725      | CAAUUUGGAUUGAGACUAUtt    | Ambion-ThermoFischer Scientific                              |
| ON-TARGETplus Human NADSYN1 siRNA #1      | L-007723-01-0005 | J-007723-09 | GGAAUAUGCGGCUACGGA       | Dharmacon                                                    |
| ON-TARGETplus Human NADSYN1 siRNA #2      |                  | J-007723-10 | CAUUUUACGAGUCGGACA       | Dharmacon                                                    |
| ON-TARGETplus Human NADSYN1 siRNA #3      |                  | J-007723-11 | UCUGCAAACUCCUCGGCAU      | Dharmacon                                                    |
| ON-TARGETplus Human NADSYN1 siRNA #4      |                  | J-007723-12 | CUGACAAAGUGAAGCGGUU      | Dharmacon                                                    |
| Silencer® Select Human NADSYN1siRNA #5    |                  | s30396      | GGGUGGAUCUCUGACUAUtt     | Ambion-ThermoFischer Scientific                              |
| ON-TARGETplus Human NMRK1 siRNA #1        | L-006722-01-0005 | J-006722-09 | CUCCAGACUCUCCGGGAUA      | Dharmacon                                                    |
| ON-TARGETplus Human NMRK1 siRNA #2        |                  | J-006722-10 | GGACUGUACCUUAGCAAGU      | Dharmacon                                                    |
| ON-TARGETplus Human NMRK1 siRNA #3        |                  | J-006722-11 | CUUUCUGAACAUAGCUCUA      | Dharmacon                                                    |
| ON-TARGETplus Human NMRK1 siRNA #4        |                  | J-006722-12 | CUUGACACUAUAUUGGAAUA     | Dharmacon                                                    |
| Silencer® Select Human NMRK1 siRNA #5     |                  | S29916      | GACACUAUAUGGAAUAGAAtt    | Ambion-ThermoFischer Scientific                              |
| ON-TARGETplus Human NMRK2 siRNA #1        | L-006747-01-0005 | J-006747-10 | UGGUCUACCUUGACGGCAU      | Dharmacon                                                    |
| ON-TARGETplus Human NMRK2 siRNA #2        |                  | J-006747-11 | GGACAGCAUGUGAGCGUUU      | Dharmacon                                                    |
| ON-TARGETplus Human NMRK2 siRNA #3        |                  | J-006747-12 | GGGACGUGCUGGAGUCUCU      | Dharmacon                                                    |
| ON-TARGETplus Human NMRK2 siRNA #4        |                  | J-006747-13 | CAGAAGUAUAGGCAGGAGA      | Dharmacon                                                    |
| Silencer® Select Human NMRK2 siRNA #5     |                  | S25996      | ACUGCUGCGUGAUCCAUCAtt    | Ambion-ThermoFischer Scientific                              |
| Silencer® Select Human STAT3 siRNA #1     |                  | S744        | GGCUGGACAAUAUCAUUGAtt    | Ambion-ThermoFischer Scientific                              |
| Silencer® Select Human STAT3 siRNA #2     |                  | S745        | GCACCUUCCUGCUAAGAUUtt    | Ambion-ThermoFischer Scientific                              |
| Human GATA3 siRNA #1                      |                  |             | GCAGGGCAGUAUCAUGAAGCCUAA | Song H. JBC. 2009                                            |
| Human GATA3 siRNA #2                      |                  |             | GGCAUGAAGGAUGCCAAGAAGUUU | Song H. JBC. 2009                                            |
| Human MAX siRNA                           |                  |             | CAAAGACAGCUUUCACAGU      | Babic. Cell Metabolism. 2013                                 |
| Silencer® Select Human MYC siRNA          |                  | 103828      | GAGCUAAAACGGAGCUUUUtt    | Ambion-ThermoFischer Scientific                              |
| Human FOXM1 siRNA                         |                  |             | GGACCACUUUCCCUACUUU      | Wu. Acta Pharmacologica Sinica. 2010                         |
| Silencer Select Human Negative Control #2 |                  | 4390846     |                          | Ambion-ThermoFischer Scientific Babic. Cell Metabolism. 2013 |

Supplementary Table 4. shRNA sets used in this study relate to Fig. 4 Extended Data Figs. 4, 8, 9

| Product Description                                                             | Catalog Number | Clonids               | shRNA sequences (target sequence)                                                                                                                                                                                            | Reference                |
|---------------------------------------------------------------------------------|----------------|-----------------------|------------------------------------------------------------------------------------------------------------------------------------------------------------------------------------------------------------------------------|--------------------------|
| shLuciferase-Control<br>MISSION® pLKO.1-puro Non-Mammalian shRNA Control SHC002 |                |                       | CTTACGCTGAGTACTTCGA<br>TRC1 and TRC1.5 pLKO.1-puro Non-Mammalian shRNA Control Plasmid DNA (SHC002), is a negative control containing a sequence that should not target any known mammalian genes, but will engage with RISC | Li. F. Cancer Cell. 2015 |
| NAMPT MISSION shRNA #1                                                          | TRCN0000116177 | NM_182790.1-1070s1c1  | CCGGCCACCTTATCTTAGAGTTATTCTCGAGAATAACTCTAAGATAAGGTGGTTTTTG                                                                                                                                                                   |                          |
| NAMPT MISSION shRNA #2                                                          | TRCN0000116180 | NM_182790.1-579s1c1   | CCGGGTAACCTTAGATGGTCTGGAATCTCGAGATCCAGACCATCTAAGTTACTTTTTG                                                                                                                                                                   |                          |
| NAPRT1 MISSION shRNA #1                                                         | TRCN0000242730 | NM_145201.4-94s21c1   | CCGGCACCATGGCGTTGGGCTATTGCTCGAGCAATAGCCCAACGCCATGGTGTTTTTG                                                                                                                                                                   |                          |
| NAPRT1 MISSION shRNA #2                                                         | TRCN0000242731 | NM_145201.4-1192s21c1 | CCGGTTCCTGGGTGGGTCTATAACTCGAGTTATAGACGCCACCCAGGGAATTTTTG                                                                                                                                                                     |                          |
| NAPRT1 MISSION shRNA #3                                                         | TRCN0000242729 | NM_145201.4-1069s21c1 | CCGGGTCAGTCCTCATCGTAGTCAGCTCGAGCTGACTACGATGAGGACTGACTTTTTG                                                                                                                                                                   |                          |
| NMRK1 MISSION shRNA #1                                                          | TRCN0000160349 | NM_017881.1-382s1c1   | CCGGCTTGAAGCACTTAACATGGAACCTCGAGTTCCATGTTAAGTGCTTCAAGTTTTTG                                                                                                                                                                  |                          |
| NMRK1 MISSION shRNA #2                                                          | TRCN0000360129 | NM_017881.2-782s21c1  | CCGGGCAAGTATATGAAGATCTAATCTCGAGATTAGATCTTCATATACTTGCTTTTTG                                                                                                                                                                   |                          |
| NMRK2 MISSION shRNA #1                                                          | TRCN0000359472 | NM_170678.2-679s21c1  | CCGGGAGAGAAGTACCCGCAACTACACTCGAGTGTAGTTGCGGGTACTTCTCCTTTTTG                                                                                                                                                                  |                          |
| NMRK2 MISSION shRNA #2                                                          | TRCN0000359397 | NM_170678.2-645s21c1  | CCGGTTCCTGACCGTCCCGTATGAACTCGAGTTCATACGGGACGGTCAGGAATTTTTG                                                                                                                                                                   |                          |
| NADSYN1 MISSION shRNA #1                                                        | TRCN0000045508 | NM_018161.4-1446s1c1  | CCGGCCACCACATCAGTCTCAACATCTCGAGATGTTGAGACTGATGTGGTGGTTTTTG                                                                                                                                                                   |                          |
| NADSYN1 MISSION shRNA #2                                                        | TRCN0000232702 | NM_018161.4-276s21c1  | CCGGCTACGGATGTTGGGATCATTACTCGAGTAATGATCCCAACATCCGTAGTTTTTG                                                                                                                                                                   |                          |

Supplementary Table 4. Inducible shRNA sets used in this study, relate to Figs. 1, 4 and Extended Data Figs. 6, 7

| Product Description                                               | Catalog Number      | Clonelds            | ishRNA sequences     |
|-------------------------------------------------------------------|---------------------|---------------------|----------------------|
| SMARTvector Inducible Nontargeting mEF1a-TurboRFP shRNA           | VSC11658            | VSH11660            |                      |
| SMARTvector Inducible Human NAPRT mEF1a - TurboRFP shRNA #1 (UTR) | V3SH11255-10EG93100 | V3SH11252-226366844 | TTTGAGATCACCTAAACAC  |
| SMARTvector Inducible Human NAPRT mEF1a - TurboRFP shRNA #2       |                     | V3SH11252-225421625 | GAGACCACTCCTCCACACG  |
| SMARTvector Inducible Human NAPRT mEF1a - TurboRFP shRNA #3       |                     | V3SH11252-225577913 | CCTGCGATCAAGCGAAGCC  |
| SMARTvector Inducible Human NMRK1 mEF1a-TurboRFP shRNA #1 (UTR)   | V3SH11255-10EG54981 | V3SH11252-226740701 | GAGCTCTGCTGTATCTATG  |
| SMARTvector Inducible Human NMRK1 mEF1a-TurboRFP shRNA #2         |                     | V3SH11252-226475183 | CTGATTCCAATGATAAATG  |
| SMARTvector Inducible Human NMRK1 mEF1a-TurboRFP shRNA #3         |                     | V3SH11252-226699253 | TCCGTCTTTATGCTGTAC   |
| SMARTvector Inducible Human NMRK2 mEF1a - TurboRFP shRNA #1       | V3SH11255-10EG27231 | V3SH11252-224727305 | TGGGCACGGGCAAACCTTCT |
| SMARTvector Inducible Human NMRK2 mEF1a - TurboRFP shRNA #2       |                     | V3SH11252-225138617 | GCTGTAGAGCAGGAAGCCT  |
| SMARTvector Inducible Human NMRK2 mEF1a - TurboRFP shRNA #3       |                     | V3SH11252-227090666 | TTACAGAGGCGTCTTGGGG  |
| SMARTvector Inducible Human NAMPT mEF1a - TurboRFP shRNA #1 (UTR) | V3SH11255-10EG10135 | V3SH11252-229940249 | GGAAAAGTGAGTGATTCGT  |
| SMARTvector Inducible Human NAMPT mEF1a - TurboRFP shRNA #2       |                     | V3SH11252-226167755 | CAAACCTCCACCAGAACCG  |
| SMARTvector Inducible Human NAMPT mEF1a - TurboRFP shRNA #3       |                     | V3SH11252-226214912 | TTCACCCCATATTTTCTCA  |
| SMARTvector Inducible Human NADSYN1 mEF1a - TurboRFP shRNA #1     | V3SH11255-08EG55191 | V3SH11252-224734628 | CTGAGTTTCCCATAGACCG  |
| SMARTvector Inducible Human NADSYN1 mEF1a - TurboRFP shRNA #2     |                     | V3SH11252-224850260 | GGCAGGTCCAAGGCTTATC  |
| SMARTvector Inducible Human NADSYN1 mEF1a - TurboRFP shRNA #3     |                     | V3SH11252-225184913 | CCGAGACCAGAGGCTCAAC  |

Supplementary Table 4. RT-PCR primer sets used in this study, relate to Fig. 3 and Extended Data Figs. 1, 5, 8

| Description | Primer ID  | 5' --> 3'                 | 3' --> 5'               |
|-------------|------------|---------------------------|-------------------------|
| TBP         | TBP        | GAGCTGTGATGTGAAGTTTCC     | TCTGGGTTTGATCATTCTGTAG  |
| B2M         | B2M        | ATGAGTATGCCTGCCGTGTGA     | GGCATCTTCAAACCTCCATG    |
| YWHAZ       | YWHAZ      | TGATCCCCAATGCTTCACAAG     | GCCAAGTAACGGTAGTAATCTCC |
| RPL13A      | RPL13A     | GGACCGTGCGAGGTATGCT       | ATGCCGTCAAACACCTTGAGA   |
| NAMPT       | NAMPT #1   | AGTGGTGCCTGTGTACTTCT      | TGCCTGTATCTGTGGTCAGC    |
| NAMPT       | NAMPT #2   | AATGTTCTCTTCACGGTGGAAA    | ACTGTGATTGGATACCAGGAC   |
| NAMPT       | NAMPT #3   | ATCCTGTTCCAGGCTATTCTGT    | CCCCATATTTTCTCACACGCAT  |
| NMRK1       | NMRK1 #1   | TCCTCAGCACTTTCCTGGTC      | CAGCCATTTCTGCTGGATG     |
| NMRK1       | NMRK1 #2   | TCATCCTGAGATATGACACTGCAA  | GTGGCAAACAACACTGGCT     |
| NMRK1       | NMRK1 #3   | ACACTTTTGCTTTGCTAGTTCTTGT | TGGAACAAAATCTGAAGAGGACC |
| NMRK2       | NMRK2 #1   | ATGACCAACGGCGGCAAG        | ATCCTGATGGATCACGCAGC    |
| NMRK2       | NMRK2 #2   | TCTCTGGACATGGAGGCCA       | AGCTGTAGAGCAGGAAGCCT    |
| NMRK2       | NMRK2 #3   | CATGAAGTCCCGAGAGGAGC      | GATTCCTGGGAGCGGTTTCAG   |
| NAPRT       | NAPRT #1   | GTGAGGTGAATGTCATTGG       | GGCCACCAGCTTATAGAC      |
| NAPRT       | NAPRT #2   | GCCAATGACATTCACCTCACT     | AGGTCTTCCGAGCTGCT       |
| NAPRT       | NAPRT #3   | TGGACATGCTGCAGTTAGCA      | GCAGTAGTGGCTCCACCTG     |
| NADSYN1     | NADSYN1 #1 | CGCATACTGACCACCTGCTA      | CAATCTGCTGGGCCAACTCT    |
| NADSYN1     | NADSYN1 #2 | CTCAACATCGATCCAGCCGT      | CAAACAGAGGGCTCTTCCCC    |
| NADSYN1     | NADSYN1 #3 | ACAAGATGACCACGCTCACA      | ATGGTCGCAGATCAAACCTGT   |



Supplementary Table 4. qPCR primer sets used in this study, relate to Extended Data Fig. 1

| Description | Primer ID  | 5' --> 3'                       | 3' --> 5'                       |
|-------------|------------|---------------------------------|---------------------------------|
| RPPH1       | RPPH1 #1   | CGG AGG GAA GCT CAT CAG TG      | TGG CCC TAG TCT CAG ACC TT      |
| HBB         | HBB #1     | CAG GTA CGG CTG TCA TCA CTT AGA | CAT GGT GTC TGT TTG AGG TTG CTA |
| NAMPT       | NAMPT #1   | AAGTGAATTTTGAGTCTGGGAAGA        | ATCAGAGTTGGCAAGAGGAAGC          |
| NAMPT       | NAMPT #2   | AGGCAGTTTGGAAGAGGTAGTG          | TATGAGGCGTCCGGAATAGA            |
| NAMPT       | NAMPT #3   | TTAAGTCACTGCTCGGTCCG            | CCAGAGCTCCCAGACTGC              |
| NMRK1       | NMRK1 #1   | ACAACTCACAAAGATGGCTTCA          | GGCCCCTTGACACTATATGGAAT         |
| NMRK1       | NMRK1 #2   | CAGGTCTGCAATGCCTTCACTTT         | ATAGAACAGCTATGGAGGGGGC          |
| NMRK1       | NMRK1 #3   | TGCTGTATCTATGCGCTCCC            | ACTGTGGTACAATGACAGCCA           |
| NMRK2       | NMRK2 #1   | GGCGCCAGGTTTTCTCAATG            | GGACGACTTCCAAGGCAGC             |
| NMRK2       | NMRK2 #2   | TTCCTTGACGCCACGAGAAC            | TCAGCAGCCCCACACTTTTC            |
| NMRK2       | NMRK2 #3   | CCATAGGACACAGAGAGCGG            | TCCTGGCCAGAGAGCTCAGAT           |
| NAPRT       | NAPRT #1   | GGT GCT TTG AAG GTG GAC AG      | CAC GAA TGA AGC TGA CCG AG      |
| NAPRT       | NAPRT #2   | TCC CAG GGT GAG GAT CAC TA      | CTT CAG GGT GTA AGG AGG GG      |
| NAPRT       | NAPRT #3   | CCCAGGTAGCTGTAGGTGGA            | AGAGAAGCGGCTGCTAGAGA            |
| NADSYN1     | NADSYN1 #1 | GCCCTGCTTTCCACATGACAG           | CCAGCTCTGTCGCGGTTAATG           |
| NADSYN1     | NADSYN1 #2 | ACATGACAGTGTCCCCAGAGG           | TTCTCTTCAAAGCCCTTCCAGC          |
| NADSYN1     | NADSYN1 #3 | TCTGATATCACAAAGCTTCGATCC        | CAGGCTCACGAGACGATCAG            |

Supplementary Table 4. Primer sets used in this study, relate to Figs. 2, 3 and Extended Data Fig. 5

Primers for cloning NAMPT enhancer [backbone vector: pGL3-Basic (Promega)]

| Description                            | Primer ID               | 5' --> 3'                                     | 3' --> 5'                                      |
|----------------------------------------|-------------------------|-----------------------------------------------|------------------------------------------------|
| NAMPT-Enhancer-4.6 Kb clone upstream   | PGL3Enh-MLUI/XHOI4.6K   | CG ACGCGT AGGATTATAAATCATGCTGCTATAAAGACACATGC | CG CTCGAG GTCATTACTTACCTGTTGGTTGCATGCCTCTTAAG  |
| NAMPT-Enhancer-4.6 Kb clone downstream | PGL3Enh-XBAI/XBAI4.6K   | CGTCTAGAAGGATTATAAATCATGCTGCTATAAAGACACATGC   | CGTCTAGAGTCATTACTTACCTGTTGGTTGCATGCCTCTTAAG    |
| NAMPT-Promotor                         | PGL3proFW-BGLII/HINDIII | GC AGATCT GTGAGCCGAGATCCAGCCACTGCACTCCAGCCTG  | AAGCTT GCGGGGCGCGCAGCGCGCTGCCAGTGCGCGGA        |
| NAMPT-Enhancer-4.6 Kb clone upstream-A | PGL3Enh-MLUI/XHOI-A     | CG ACGCGT AGGATTATAAATCATGCTGCTATAAAGACACATGC | CTCGAGACCATTATATGTGGGGCTTCTTAGTTACAACAGCTAGGCC |
| NAMPT-Enhancer-4.6 Kb clone upstream-B | PGL3Enh-MLUI/XHOI-B     | CG ACGCGT GATGGGAGTTTATTTTCTCCATGTAATAACCCAG  | CTCGAGTAGTTTGTTTCATTCACACTCATTGGGTGCC          |
| NAMPT-Enhancer-4.6 Kb clone upstream-C | PGL3Enh-MLUI/XHOI-C     | CG ACGCGT GACCTGAGGCTGTTGACACTCATAGCTTTCC     | CTCGAGGTATCATTGAGCCACATTTTACCATCTCACCC         |
| NAMPT-Enhancer-4.6 Kb clone upstream-D | PGL3Enh-MLUI/XHOI-D     | CG ACGCGT AGTAGGAGGATTTCCAGGCCTCACAGGAGTG     | CTCGAGACTGGGGAGGTGAAACACTTCAACCATCC            |
| NAMPT-Enhancer-4.6 Kb clone upstream-E | PGL3Enh-MLUI/XHOI-E     | CG ACGCGT CTATCAGTGACAGGCTGTGCCTGG            | CG CTCGAG GTCATTACTTACCTGTTGGTTGCATGCCTCTTAAG  |

Supplementary Table 4. Primer sets used in this study, relate to Fig. 2

Primers used for site-directed mutagenesis [backbone vector: pGL3-Basic (Promega)]

| Description          | Primer ID | 5' --> 3'                                              | 3' --> 5'                                               | DNA coordinates (GRCh37/hg19) |
|----------------------|-----------|--------------------------------------------------------|---------------------------------------------------------|-------------------------------|
| NAMPT-Enh $\Delta$ A | BCDE      | AGGATTATAAATCATGCTGCGCATAGGGTACTGGCCTAGCTGTTGTA        | TACAACAGCTAGGCCAGTACCCTATGCGCAGCATGATTTATAATCCT         | 105856198-105856822           |
| NAMPT-Enh $\Delta$ B | ACDE      | GCATAGGGTACTGGCCTAGCTGTTGTACCTTTGCTTTACTTGGCAAAGATTAGG | CTGTGAGGCCTGGAAAAATCCTCCTACTCCTAATCTTTGCCAAGTAAAGCAAAGG | 105856850-105857928           |
| NAMPT-Enh $\Delta$ C | ABDE      | CCTTTGCTTTACTTGGCAAAGATTAGGAGTAGGAGGATTTCCAGGCCTCACAG  | CTGTGAGGCCTGGAAAAATCCTCCTACTCCTAATCTTTGCCAAGTAAAGCAAAGG | 105857929-105858849           |
| NAMPT-Enh $\Delta$ D | ABCE      | AGTAGGAGGATTTCCAGGCCTCACAGCTATCAGTGCACAGGCTGTGCCTGG    | CCAGGCACAGCCTGTGCACTGATAGCTGTGAGGCCTGGAAAAATCCTCCTACT   | 105858850-105859749           |
| NAMPT-Enh $\Delta$ E | ABCD      | CTATCAGTGCACAGGCTGTGCCTGGGCTGTGTGTGCAGTTGGGTAAGATC     | GATCTTACCCAACTGCACACAGCCCAGGCACAGCCTGTGCACTGATAG        | 105859750-105860665           |

Supplementary Table 4. Primer sets used in this study, relate to Fig. 3

Primers used for CHIP-qPCR

| Description                       | Primer ID | 5' --> 3'             | 3' --> 5'             | DNA coordinates (GRCh37/hg19) |
|-----------------------------------|-----------|-----------------------|-----------------------|-------------------------------|
| NAMPT-Enhancer Negative Contr Neg |           | ACTCCAGTCTCAAAGCCTCAT | ACCCAGAGACAGCATCTGTAA | 105843605-105843795           |
| NAMPT-Enhancer H3K27ac            | p1        | CAGCTCATTCTCACCCAGCA  | ATGGCTACCTGTCCAGCAAC  | 105857093-105857240           |
| NAMPT-Enhancer H3K27ac            | p2        | ACAGGTAGCCATCTCAGCCA  | AGCTTTCTGGGATCGGGAAG  | 105857229-105857462           |

Supplementary Table 4. sgRNA primer sets used in this study, relate to Fig. 3 and Extended Data Fig. 5

CRISPRi sgRNA KRAB-dCas9 primer sequences (sgRNA sequence is underlined)

| Description   | Primer ID                         | DNA coordinates         |
|---------------|-----------------------------------|-------------------------|
| Dummy_sgRNA   | Target = none predicted           | N/A                     |
| Dummy_sgRNA_F | <u>CACCGATCGTTTCCGCTTAACGGCG</u>  |                         |
| Dummy_sgRNA_R | <u>AAACCGCCGTTAAGCGGAAACGATC</u>  |                         |
| g1-sgRNA      | Target = CTGCATTGGATGGTCCGTGT CGG | chr7:hg19               |
| g1-sgRNA-F    | <u>CACCCCTGCATTGGATGGTCCGTGT</u>  | 105791320-105791342     |
| g1-sgRNA-R    | <u>AAACACACGGACCATCCAATGCAG</u>   |                         |
| g2-sgRNA      | Target = CATGTCCATCAATGATAGAC TGG | chr7:hg19               |
| g2-sgRNA-F    | <u>CACCCATGTCCATCAATGATAGAC</u>   | 105,856,108-105,856,127 |
| g2-sgRNA-R    | <u>AAACGTCTATCATTGATGGACATG</u>   |                         |
| g3-sgRNA      | Target = AGGATCCAAAGCAACCCCGT TGG | chr7:hg19               |
| g3-sgRNA-F    | <u>CACCGAGGATCCAAAGCAACCCCGT</u>  | 105856983-105857005     |
| g3-sgRNA-R    | <u>AAACACGGGGTTGCTTTGGATCCTC</u>  |                         |
| g4-sgRNA      | Target = TCCAAGATCTTCCCGGCATC GGG | chr7:hg19               |
| g4-sgRNA-F    | <u>CACCGTCCAAGATCTTCCCGGCATC</u>  | 105857662-105857684     |
| g4-sgRNA-R    | <u>AAACGATGCCGGGAAGATCTTGGAC</u>  |                         |

Supplementary Table 4. Primer sets used in this study, relate to Extended Data Figs. 7, 10

Primers for cloning NAMPT; NMRK1 and NAPRT cDNA [backbone vector: pLV cs2.0 N-Flag]

| Description | Primer ID        | 5' --> 3'                                       | 3' --> 5'                               |
|-------------|------------------|-------------------------------------------------|-----------------------------------------|
| nampt-FLAG  | NAMPT-BamHI/XmaI | AGAGAATTCGGATCC ATGAATCCTGCGGCAGAAG             | TGGCTCGAGCCCGGG CTAATGATGTGCTGCTTCCAG   |
| nmrk1-FLAG  | NMRK1-BamHI/XmaI | AGAGAATTCGGATCC ATGAAAACATTTATCATTGGAATCAGTGGTG | TGGCTCGAGCCCGGG TTATGCTGTCATTGCAAACAC   |
| naprt-FLAG  | NAPRT-BamHI/XmaI | AGAGAATTCGGATCC ATGGCGGCGGAGCAGGAC              | TGGCTCGAGCCCGGG TCAGGGGGACTGCCCGCACACAG |
